# Supplementary material for: Genome-Wide Gene Expression Analyses of the AtfA/AtfB-Mediated Menadione Stress Response in Aspergillus nidulans
Source: MDPI journal article supplement (doi:10.3390/cells12030463), 2023-01-31
Supplement: s1 [file s1]

## Supplementary materials

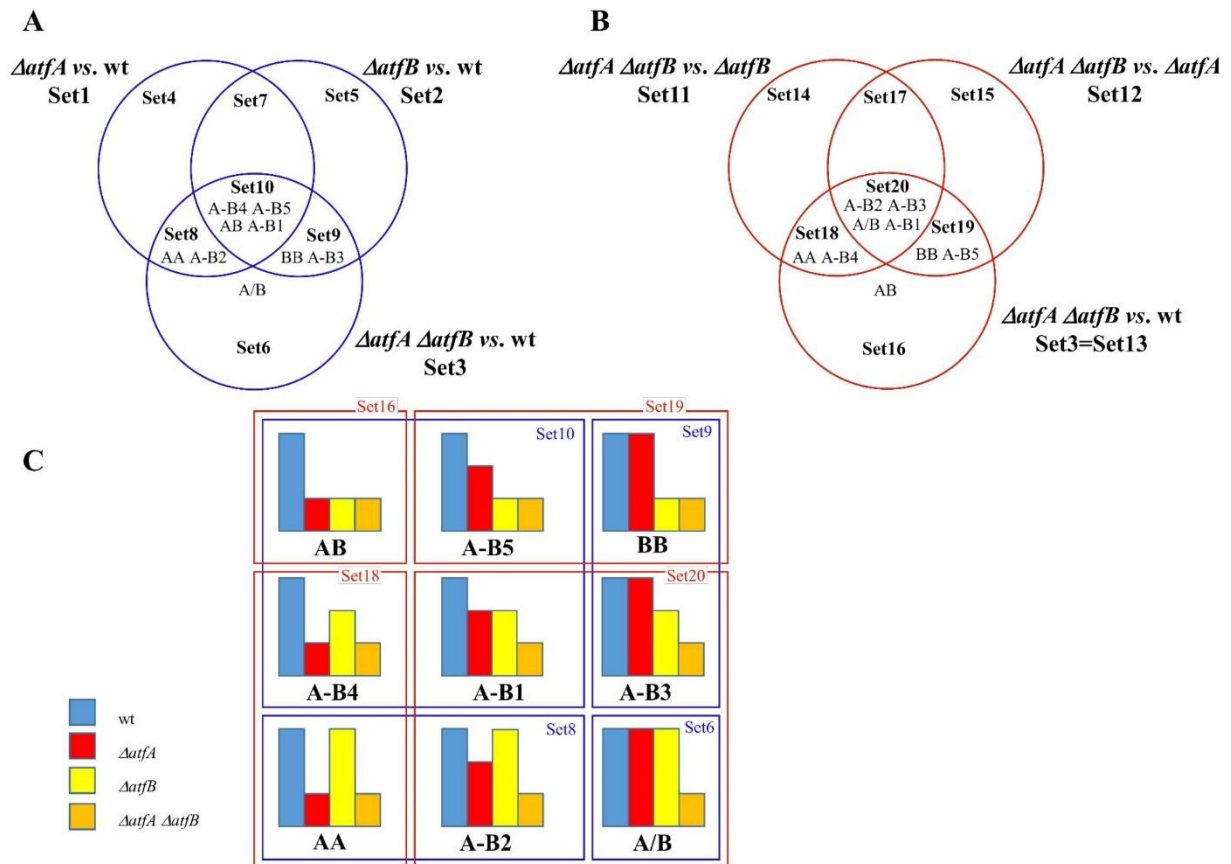

**Figure S1.** Identification of potentially AtfA and AtfB dependent genes. (A,B): Comparisons and gene sets used to identify potentially AtfA and AtfB dependent genes. (C): Expected transcriptional behaviour of genes in the marked subsets. Blue (control), red (*ΔatfA*), yellow (*ΔatfB*) and orange (*ΔatfA ΔatfB*) rectangles with different length represent significantly different transcriptional activity of genes in different strains.

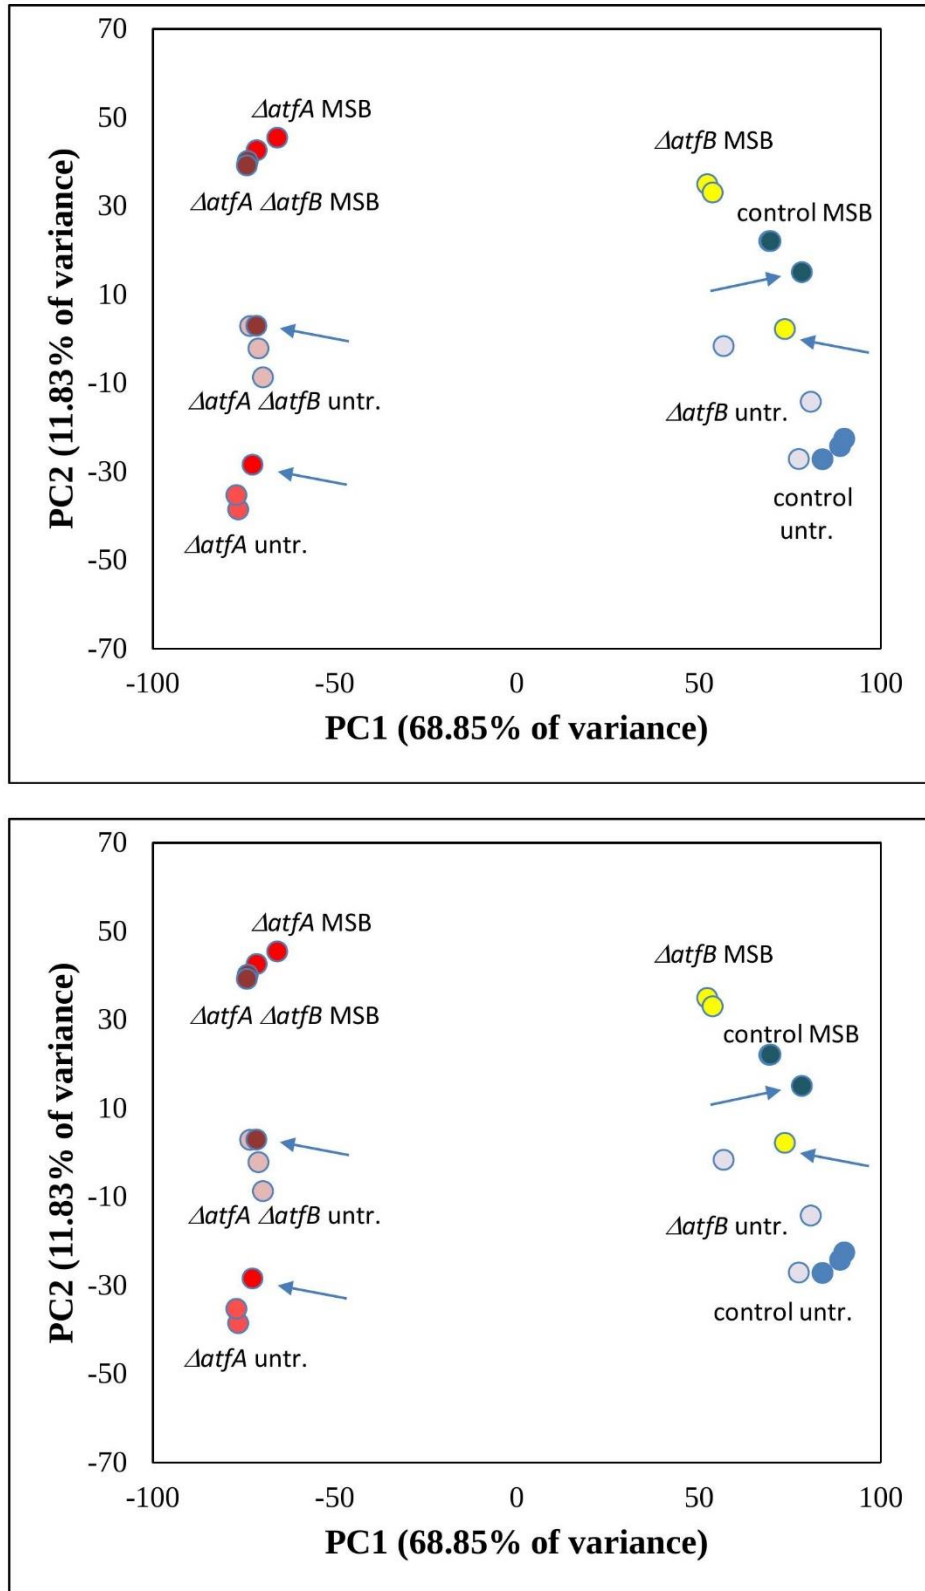

**Figure S2** Principal component (PC) analysis of the transcriptomes. PC analysis was carried out using the rlog data generated with the DeSeq2 software. (A) mycelial samples; (B) conidial samples; Arrows indicate the conidial samples obtained in separate experiments.

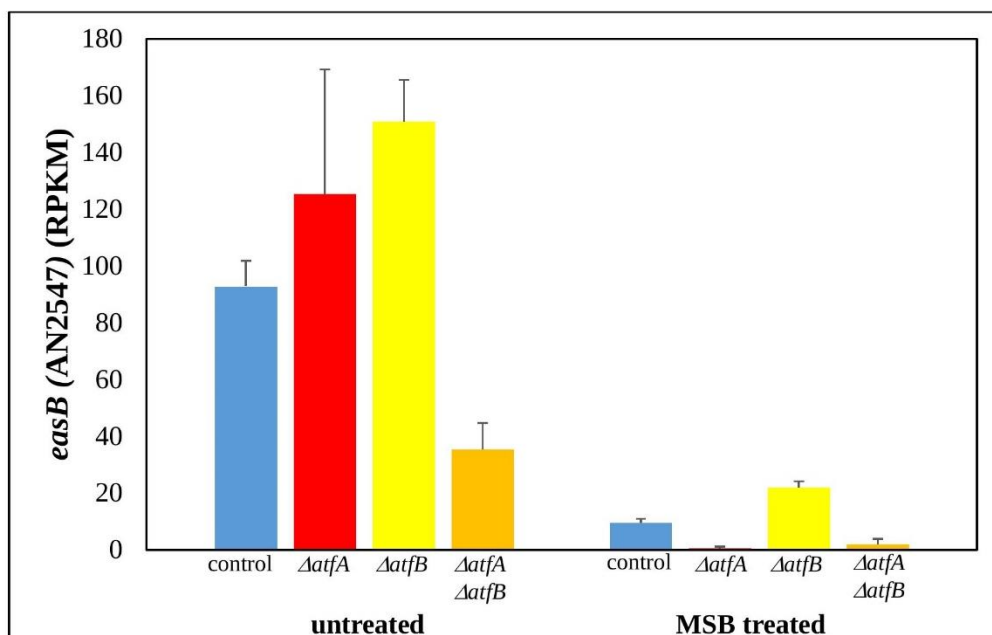

**Figure S3** Transcriptional profile of *easB* encoding the polyketide synthase of the Emericellamide secondary metabolite cluster in mycelial samples. Mean  $\pm$  SD RPKM values calculated from the three biological replicates are presented.

**Table S1** Lists and characteristics of AtfA- and AtfB-dependent genes.

down - downregulated by MSB stress treatment

up - upregulated by MSB stress treatment

AA - regulated by AtfA but not by AtfB

BB - regulated by AtfB but not by AtfA

AB - Regulated by both AtfA and AtfB; deletion of either *atfA* or *atfB* reduces the gene activity at least to the level of the double mutant.

A/B - Regulated by both AtfA and AtfB; deletion of only *atfA* or only *atfB* does not reduce the gene activity.

A-B - Regulated by both AtfA and AtfB; deletion of *atfA* or *atfB* reduces only partially the gene activity. (See also Fig. S1)

**Table S2** List, characteristics and RPKM values of genes that showed both AtfA- and AtfB-dependence in mycelial and conidial samples.

**Table S3** Results of the gene set enrichment analyses for AtfA- and AtfB-dependent genes.

Sheet 1 AtfA-dependent genes (Set26), untreated cultures, mycelium

Sheet 2 AtfA-dependent genes (Set26), MSB-treated cultures, mycelium

Sheet 3 AtfA-dependent genes (Set26), untreated cultures, conidium

Sheet 4 AtfA-dependent genes (Set26), MSB-treated cultures, conidium

Sheet 5 AtfB-dependent genes (Set27), untreated cultures, mycelium  
Sheet 6 AtfB-dependent genes (Set27), MSB-treated cultures, mycelium  
Sheet 7 AtfB-dependent genes (Set27), untreated cultures, conidium  
Sheet 8 AtfB-dependent genes (Set27), MSB-treated cultures, conidium

**Table S4** Characterization of AtfA- and AtfB-dependent genes by their known or putative functions.

Sheet 1 Secondary metabolite cluster genes  
Sheet 2 Selected carbohydrate metabolism gene groups  
Sheet 3 Antioxidative enzyme, Fe-S cluster assembly, phosphorelay response regulator and transcription factor genes  
Sheet 4 TCA cycle and respiration genes
