# Supplementary material for: Genome-Wide Gene Expression Analyses of the AtfA/AtfB-Mediated Menadione Stress Response in Aspergillus nidulans
Source: Cells. 2023 Jan 31;12(3):463. doi: 10.3390/cells12030463 (PMC9913763; doi:10.3390/cells12030463)
Supplement: Supplementary file 1 [file cells-12-00463-s001.zip]

Archive with 5 entries (5 files):
- Supplementary Materials.pdf
- Table S1 (AtfA and or AtfB dependent genes)new.xlsx
- Table S2 both AtfA-AtfB genes.xlsx
- Table S3 Enrichment.xlsx
- Table S4 gene groups.xlsx
