# Supplementary material for: Genome-Wide Gene Expression Analyses of the AtfA/AtfB-Mediated Menadione Stress Response in Aspergillus nidulans
Source: Cells. 2023 Jan 31;12(3):463. doi: 10.3390/cells12030463 (PMC9913763; doi:10.3390/cells12030463)
Supplement: Supplementary file 1 [file cells-12-00463-s001.zip › Table S1 (AtfA and or AtfB dependent genes)new.xlsx]

## Sheet: Munka1
Table S1 List and characteristics of AtfA- and AtfB-dependent genes.
down - downregulated by MSB stress treatment
up - upregulated by MSB stress treatment
AA - regulated by AtfA but not by AtfB
BB - regulated by AtfB but not by AtfA
AB - Regulated by both AtfA and AtfB; deletion of either atfA or atfB reduces the gene activity at least to the level of the double mutant.
A/B - Regulated by both AtfA and AtfB; deletion of only atfA or only atfB does not reduce the gene activity.
A-B - Regulated by both AtfA and AtfB; deletion of atfA or atfB reduces only partially the gene activity. (See also Fig. S1)
GENE ID	Description (AspGD)	Gene name	MSB stress responsiveness in mycelial samples	AtfA-dependent in untreated mycelial samples	AtfB-dependent in untreated mycelial samples	AtfA-dependent in MSB-treated mycelial samples	AtfB-dependent in MSB-treated mycelial samples	MSB stress responsiveness in conidial samples	AtfA-dependent in untreated conidial samples	AtfB-dependent in untreated conidial samples	AtfA-dependent in MSB-treated conidial samples	AtfB-dependent in MSB-treated conidial samples
AN2541	Putative alpha-L-arabinofuranosidase with a predicted role in arabinose polymer metabolism; the feature AN9520 has been merged into AN2541	abfA							AA		AA
AN8007	Protein with arabinan endo-1,5-alpha-L-arabinosidase activity, involved in degradation of pectin	abnC	down			AA
AN6525	Putative formate dehydrogenase with a predicted role in oxalic acid metabolism; intracellular; protein abundance decreased by menadione stress; inducible by acetate; expression reduced after exposure to farnesol	aciA									AA
AN4914	Putative acetate kinase with a predicted role in acetate, acetaldehyde, and ethanol (two-carbon) metabolism	ack	down						AA		AA
AN5525	Putative aconitate hydratase with a predicted role in the TCA cycle; intracellular; protein abundance decreased by menadione stress; protein expressed at increased levels in a hapX mutant versus wild-type	acoA							AA		AA
AN5226	Acetate permease, involved in acetate uptake; has similarity to GPR1/FUN34/YaaH family members; transcript induced by ethanol	acpA							AA
AN5634	Isocitrate lyase, required for utilization of acetate and fatty acids as carbon sources; transcriptional induction in response to acetate is mediated by FacB; transcriptional induction in response to long-chain fatty acids mediated by FarA	acuD							A-B	A-B	AA
AN6653	Malate synthase, required for utilization of acetate as carbon source; transcription induction by acetate mediated by FacB; carbon catabolite repression mediated by CreA; transcription induction by long-chain fatty acids mediated by FarA	acuE							AA		AA
AN1918	Putative phosphoenolpyruvate carboxykinase with a predicted role in gluconeogenesis and glycolysis; transcriptionally induced by acetate and after exposure to farnesol	acuF							A-B	A-B	A-B	A-B
AN5604	Putative fructose-bisphosphatase with a predicted role in gluconeogenesis and glycolysis; intracellular; protein abundance decreased by menadione stress; expression upregulated after exposure to farnesol	acuG							A-B	A-B	AA
AN6279	Carnitine acetyltransferase, required for utilization of acetate and fatty acids; transcription induction in response to acetate mediated by FacB; transcription induction in response to long-chain fatty acids mediated by FarA	acuJ	up						AA		AA
AN7287	Mitochondrial succinate/fumarate antiporter involved in utilization of acetate and other carbon sources	acuL	up						A-B	A-B	A-B	A-B
AN6673	Putative alpha-fucosidase	afcB	up					down	AB	AB
AN10376	Putative alpha-fucosidase	afcC							AA
AN8953	Putative alpha-glucosidase with a predicted role in maltose metabolism; transcriptionally induced by isomaltose; induced by rapamycin-induced autophagy	agdB	down	AA		AA		down		BB
AN10420	Putative alpha-glucosidase with a predicted role in starch metabolism; transcriptionally induced by isomaltose in an amyR-dependent manner	agdF	down	AA
AN4843	Putative alpha-glucosidase with a predicted role in maltose metabolism	agdG	down	AA
AN7624	Putative alpha-galactosidase with a predicted role in galactose and galactitol metabolism and in degradation of mannans	aglB	down	AA				down
AN8138	Alpha-galactosidase, involved in degradation of mannans; predicted role in galactose and galactitol metabolism; glycoside hydrolase family 36 (GH36); transcriptionally induced by growth on xylose	aglC	down	A-B	A-B	AA		down	A-B	A-B	AA
AN9035	Putative alpha-galactosidase with a predicted role in galactose and galactitol metabolism and in degradation of mannans	aglG							AA		A-B	A-B
AN3790	Putative alpha-1,3-glucanase	agnB	down					down	AB	AB
AN9042	Putative alpha-1,3-glucanase	agnC	up					down	AB	AB
AN1604	Putative alpha-1,3-glucanase; predicted glycosyl phosphatidylinositol (GPI)-anchor	agnE	down			AA			AA
AN5885	Catalytic subunit of alpha-1,3 glucan synthase complex; plays a minor role in alpha-1,3 glucan synthesis compared to AgsB; locus contains the conserved upstream open reading frame (uORF) AN5885-uORF	agsA	down			AA		down
AN3307	Catalytic subunit of the major alpha-1,3 glucan synthase complex; mutants grow as dispersed hyphae in liquid culture	agsB				AA		down	A-B	A-B
AN9103	Putative apoptosis-inducing factor (AIF)-like mitochondrial oxidoreductase; mutants display decreased survival in the presence of farnesol or menadione, decreased electron transport; expression upregulated after exposure to farnesol	aifA	down						AA		AA
AN3741	Alcohol dehydrogenase II, has a predicted role in two-carbon compound metabolism	alcB							AA
AN2286	Alcohol dehydrogenase III with a predicted role in two-carbon compound metabolism; required for long-term survival under anaerobic conditions; regulated at both the transcriptional and translational levels	alcC				AB	AB
AN8982	Predicted protein of unknown function; member of the alc gene cluster	alcU							A/B	A/B
AN0554	Aldehyde dehydrogenase; possible roles in beta-alanine, acetate, acetaldehyde and ethanol metabolism, methylglyoxal bypass, penicillin biosynthesis; menadione stress-decreased; carbon starvation autophagy-induced; hypoxia upregulated	aldA							A/B	A/B
AN3402	Putative alpha-amylase with a predicted role in starch metabolism; transcriptionally induced by isomaltose in an amyR-dependent manner	amyB	down					down		BB
AN3308	Putative alpha-amylase with a predicted role in starch metabolism; predicted glycosyl phosphatidylinositol (GPI)-anchor	amyD						down	AA		AA
AN3388	Putative alpha-amylase with a predicted role in starch metabolism; transcriptionally induced by isomaltose in an amyR-dependent manner	amyF	down	A/B	A/B
AN1089	Ortholog(s) have ubiquitin protein ligase binding activity, role in endocytosis, positive regulation of ubiquitin-dependent endocytosis, regulation of intracellular transport and early endosome, late endosome localization	artB							AA		AA
AN9105	Arrestin-like protein	artD							AA		AA
AN20017	Mitochondrially encoded protein with similarity to subunit 9 of F1-F0 ATP synthase; apparently does not encode the functional subunit 9, which is encoded by the nuclear oliC gene	atp9		AA
AN8383	Polyketide synthase (PKS); produces 3,5- dimethyl orsellinic acid, the first intermediate in the biosynthesis of austinol and dehydroaustinol; aus secondary metabolism gene cluster member	ausA	down			AA		up
AN8534	Purine transporter with high affinity for hypoxanthine and adenine; takes up purines for nucleotide salvage and as nitrogen sources; induced by uric acid; regulated by UaY and AreA	azgA	up						A-B	A-B	AA
AN7915	Putative glucosidase; member of the F9775 secondary metabolite gene cluster	bglD	up						AB	AB
AN6652	Putative beta-glucosidase	bglE									AA
AN2612	Putative beta-glucosidase with a predicted role in degradation of glucans	bglK	up					down	AA		AA
AN9183	Putative beta-glucosidase with a predicted role in polysaccharide degradation	bglR	down	A/B	A/B			down
AN7635	Transcript induced by exposure of A. nidulans to bafilomycin B1	binA		AA				down
AN0973	C2H2 zinc finger transcription factor, fphA- and lreB-dependent light induced regulator of conidiophore development; locus has 2 overlapping transcriptional units called brlA alpha and brlA beta; see 5' brlA micro-ORF, AN0974	brlA	down			AA		up
AN4508	Bax Inhibitor family protein; accumulates in germinating conidia in either low-or high-Pi media at both acidic and alkaline pH	bxiA							A/B	A/B
AN7619	Secreted thaumatin-like protein; role in early conidial germination; localized to the cell wall of germinating conidia but not to germ tubes; null appears wild-type, shows severe conidial germination defects with cetA calA double mutant	calA	down					down		BB
AN8793	Putative succinate dehydrogenase (ubiquinone) with a predicted role in the TCA cycle; palA-dependent expression independent of pH	carC									AA
AN8637	Conidia-specific catalase; predicted role in gluconic acid and gluconate metabolism	catA	down	AA		AA			AA		AA
AN9285	Ortholog of A. fumigatus grg1; homologous to ccg-1 from N. crassa; transcript induced by light in developmentally competent mycelia	ccgA	down	AA		AA			AA		A-B	A-B
AN3079	Secreted thaumatin-like protein; role in early conidial germination; localized to the cell wall of germinating conidia but not to germ tubes; cetA transcript is repressed by glucose	cetA						down	AB	AB	AB	AB
AN8638	Transcript enriched in dormant conidia; induced by light in in developmentally competent mycelia	cetJ	down	AA		AA			AA		AA
AN9194	Transcript enriched in dormant conidia	cetL							A-B	A-B	A-B	A-B
AN6445	Putative aryl-alcohol oxidase-related protein; coregulated with the NRPS/AN6444; encoded within the cichorine gene cluster	cicC							AA
AN8275	Mitochondrial citrate synthase with a predicted role in the TCA cycle	citA							AA		AA
AN4483	Predicted protein serine/threonine kinase, part of HogA mitogen-activated protein kinase (MAPK) signaling pathway, involved in regulation of stress response and development	cmkD							AA		AA
AN1547	Acyl-CoA:carboxylate CoA-transferase involved in detoxification of propionyl-CoA ; predicted role in acetate, acetaldehyde, and ethanol (two-carbon) metabolism; expression upregulated after exposure to farnesol	coaT	up						AA		AA
AN8640	Ortholog of N. crassa conF, light-induced transcript expressed during conidiation in N. crassa; double conF conJ deletion results in increased cellular glycerol or erythritol leading to delayed germination and desiccation resistance	conF	down	A-B	A-B				AA		AA
AN5015	Putative conidiation gene; transcript induced by light in in developmentally competent mycelia; double conF and conJ deletion results in increased cellular glycerol or erythritol leading to delayed germination and desiccation resistance	conJ		AA					A-B	A-B	A-B	A-B
AN0387	Cryptochrome, nuclearly-localized protein that senses UVA and blue light and represses sexual development by regulating other regulators such as VeA, NsdD, and RosA; member of the class I cyclobutane pyrimidine dimer (CPD) photolyase family	cryA		AA		AA			AA		AA
AN6246	Cytochrome C	cycA							AA		AA
AN6835	Putative cytochrome P450; expression upregulated after exposure to farnesol	CYP505A8	up						AA		AA
AN5553	Putative cytochrome P450	CYP5080D1							AA		AA
AN8358	Putative cytochrome P450	CYP530A3	up						A-B	A-B	AA
AN5665	Putative cytochrome P450	CYP531D2	down			AA
AN9296	Putative cytochrome P450	CYP535D1	down	AA
AN10617	Putative cytochrome P450	CYP539B2									AB	AB
AN8919	Putative cytochrome P450 monooxygenase	CYP540A2	up						AA		AA
AN7881	Putative cytochrome P450; predicted secondary metabolism gene cluster member	CYP548C1	up			AA
AN9007	Putative cytochrome P450; predicted secondary metabolism gene cluster member	CYP548D1	up						A-B	A-B
AN1300	Putative cytochrome P450; possibly a pseudogene	CYP548G2P							A/B	A/B	AA
AN1737	Putative cytochrome P450; transcript is induced by nitrate	CYP567C1	down			AA		down	A/B	A/B
AN0459	Putative cytochrome P450	CYP578C1							AA		AA
AN9384	Putative cytochrome P450 alkane hydroxylase	CYP584E1	up								AA
AN10613	Putative cytochrome P450	CYP619B1	down						A-B	A-B	AA
AN3394	Putative cytochrome P450; putative O-methylsterigmatocystin oxidoreductase; coregulated (with micA/AN3396 and AN3395) secondary metabolism cluster member	CYP620D1	down	AA				down
AN3349	Putative cytochrome P450	CYP659A1	down	AA
AN11192	Putative cytochrome P450	CYP664A1							AB	AB
AN8338	Putative cytochrome P450	CYP671A1							A-B	A-B	A-B	A-B
AN6434	Putative cytochrome P450	CYP672A1						down		BB
AN7932	Putative cytochrome P450	CYP682A1		AA
AN1794	Putative cytochrome P450; expression reduced after exposure to farnesol	CYP682D1	up						AA
AN10028	Putative cytochrome P450	CYP684A1	down					up			AA
AN7898	Major facilitator superfamily (MFS) transporter with a role in secondary metabolism; member of the dba gene cluster; dba cluster expression is coregulated	dbaD		AA				down	A-B	A-B	AA
AN10456	NEDD8-specific protease; required for light-dependent development	denA							AA		AA
AN6254	Putative mitochondrial dicarboxylate:inorganic phosphate antiporter	dicA							AA		AA
AN5324	Dehydrin-like protein; protein induced by farnesol	dlpA		AA		AA		down	A-B	A-B	A-B	A-B
AN2545	Putative nonribosomal peptide synthetase; emericellamide synthetase; required for emericellamide biosynthesis; emericellamide (eas) biosynthetic gene cluster member	easA	down			AA
AN2547	Putative polyketide synthase; required for emericellamide biosynthesis	easB	down	A/B	A/B	AA
AN2548	Putative acyltransferase; required for emericellamide biosynthesis; emericellamide (eas) biosynthetic gene cluster member	easC	down	A/B	A/B	AA
AN2549	Putative acyl-CoA ligase; required for emericellamide biosynthesis; emericellamide (eas) biosynthetic gene cluster member	easD	down	A/B	A/B	AA		up
AN6642	Putative potassium-transporting ATPase with a predicted role in energy metabolism; locus contains the conserved upstream open reading frames (uORFs) AN6642-uORF and AN6642-uORF.2	enaA	down	AA					A/B	A/B	AA
AN8947	Putative exo-1,3-beta-glucanase with a predicted role in glucan processing	exgE							AA		AA
AN5626	Acetyl-CoA synthase, required for utilization of acetate as a carbon source; transcriptional induction by acetate is mediated by FacB; carbon catabolite repression is mediated by CreA	facA							AA
AN1059	Carnitine acetyltransferase, required for utilization of acetate as carbon source; transcriptional induction by acetate is mediated by FacB; carbon catabolite repression is mediated by CreA; predicted role in the carnitine shuttle	facC							AA		A-B	A-B
AN1896	Fumarylacetoacetate hydrolase, catalyzes the last step in the phenylalanine catabolic pathway; intracellular; protein abundance decreased by menadione stress; mutation in human ortholog causes type I hereditary tyrosinaemia	fahA	up						A/B	A/B
AN8123	Putative fructosyl amino acid oxidase, catalyzes oxidative deglycation of glycated amines (Amadori compounds); induction of expression by fructosyl amines depends in veA gene	faoA							AA		AA
AN1425	Putative transcription factor containing a Zn2-Cys6 binuclear cluster domain; required for transcriptional activation of genes involved in utilization of short-chain fatty acids; highly conserved in filamentous ascomycetes	farB	up								AA
AN5877	Putative fatty acyl-CoA synthetase	fatB							AA		AA
AN2875	Putative fructose-bisphosphate aldolase with a predicted role in gluconeogenesis and glycolysis; intracellular, menadione stress-induced protein; palA-dependent expression independent of pH	fbaA							AA		AA
AN4510	F-box protein; mutant shows increased resistance to 2-deoxyglucose; BLAST indicates no apparent homologs in higher eukaryotes	fbxA							AA		AA
AN7169	NirA-dependent flavohemoprotein; required for nitrate and nitrite reductase enzyme activity, regulates sexual development; menadione stress-induced protein; induced by nitrate; palA-dependent, pH-independent expression	fhbA	up					down	AB	AB
AN3522	Flavohemoprotein, involved (with FhbA) in sterigmatocystin production	fhbB	down						AA		AA
AN5803	Predicted fimbrin protein; a highly conserved protein that contains two actin-binding domains (ABD) and a predicted EF hand calcium-binding domain; involved in hyphal polarity and conidiophore development; menadione-induced protein	fimA							AA
AN4577	Putative kynurenine formamidase with a predicted role in aromatic amino acid biosynthesis; transcript induced under low nitrogen conditions	fmdS							AA		AA
AN4979	Predicted dihydroneopterin aldolase; predicted role in folic acid-containing compound metabolism; extragenic suppressor of a crzA null mutation; role in nuclear division cycle	folA							AA		AA
AN7662	Putative metalloreductase with a predicted role in iron homeostasis; regulated by iron independently of SreA	freA	up						AB	AB	AA
AN0660	Putative allantoin transporter; transcript is induced by allantoin and by uric acid and is repressed by ammonium	furA							A/B	A/B	AA
AN7955	Protein with homology to the Saccharomyces cerevisiae uracil transporter Fur4p; mutant is unaffected in uracil transport in A. nidulans	furG				AA		down
AN6182	Putative hexose-1-phosphate uridylyltransferase with a predicted role in galactose and galactitol metabolism; expression upregulated after exposure to farnesol	galD							AA
AN9148	Putative UTP-glucose-1-phosphate uridylyltransferase with a predicted role in galactose and galactitol metabolism; protein expressed at decreased levels in a hapX mutant versus wild-type	galF							AA		AA
AN6792	Putative NAD+ dependent glycerol 3-phosphate dehydrogenase with a predicted role in glycerol metabolism	gfdB	down						AA		AA
AN5563	Putative dehydrogenase with a predicted role in carbohydrate metabolism; NADP+-dependent glycerol dehydrogenase; required for osmotolerance; transcript downregulated by growth in glycerol; expression upregulated after exposure to farnesol	gldB							AA		AA
AN8689	Putative glucokinase; ORF that was absent from the original release of version 4 of the A. nidulans annotation, but present in a previous version; reinstated into version 4 in AspGD as of July 2009	glkA							AA		AA
AN4159	Putative glutamate-ammonia ligase with a predicted role in glutamate and glutamine metabolism; intracellular; transcript upregulated by nitrate limitation; protein abundance decreased by menadione stress and induced by farnesol	glnA						down	AA		AA
AN8041	Glyceraldehyde-3-phosphate dehydrogenase with a predicted role in gluconeogenesis and glycolysis; the gpdA promoter is a commonly used regulatory sequence for driving constitutive heterologous gene expression	gpdA							AA		AA
AN2583	Putative glyceraldehyde-3-phosphate dehydrogenase with a predicted role in gluconeogenesis and glycolysis	gpdC						down	AB	AB
AN5720	Putative G-protein coupled receptor; has a PQ loop repeat	gprJ							AA		AA
AN10273	Putative glutathione S-transferase; intracellular, menadione stress-induced protein	gst3							AA
AN6024	Protein with glutathione S-transferase and glutathione peroxidase activities; intracellular, menadione stress-induced protein	gstB		AA
AN3641	Ortholog(s) have glucokinase activity, gluconokinase activity and role in D-gluconate catabolic process, glycolytic process via Entner-Doudoroff Pathway	gukA							AB	AB
AN7008	Putative mitochondrial hydroxyacyl-CoA dehydrogenase involved in short-chain fatty acid beta-oxidation	hadA							AA		AA
AN2284	Putative 5-aminolevulinic acid synthase; catalyzes the first committed step in the synthesis of heme; protein expressed at increased levels in a hapX mutant compared to wild-type	hemA	up						AA
AN7945	Putative histidine-containing phosphotransfer protein	hk2		AA		AA			AA		AA
AN2581	Putative histidine-containing phosphotransfer protein	hk-8-1		AA		AA			AA		AA
AN4113	Histidine kinase, histidine-containing phosphotransfer protein; expression upregulated after exposure to farnesol; palA-dependent expression independent of pH	hk-8-2				AA			AA		AA
AN6820	Putative histidine-containing phosphotransfer protein	hk-8-3							AA		AA
AN5273	Bifunctional enzyme with 3-methylglutaconyl-CoA hydratase and 3 hydroxy-3-methylglutaryl-CoA lyase activity; involved in conversion of leucine to acetyl-CoA and acetoacetate	hlyA	up					down	A-B	A-B
AN1017	Putative mitogen-activated protein kinase (MAPK) involved in osmotic stress response; highly up-regulated under osmotic stress conditions; required for sexual development and sporulation; mutant sensitive to NaCl	hogA							AA		AA
AN7321	Ortholog(s) have eukaryotic translation initiation factor 2alpha kinase activity and role in G1 cell cycle arrest in response to nitrogen starvation, negative regulation of cytoplasmic translational initiation in response to stress	hriA							A/B	A/B
AN0858	Putative chaperone	hsp104							AA		AA
AN10507	Ortholog(s) have identical protein binding, mRNA binding, unfolded protein binding activity and role in cellular response to heat, cellular response to misfolded protein, cellular response to unfolded protein, protein folding	hsp20						down	AA		AA
AN2530	Heat shock protein 30; expression and protein levels upregulated after exposure to farnesol	hsp30						down	A-B	A-B
AN5129	70 kilodalton heat shock protein; protein abundance decreased by menadione stress; physically associates with importin-alpha, KapA; palA-dependent expression independent of pH; protein induced by farnesol	hsp70							A/B	A/B	A/B	A/B
AN11067	Putative histone deacetylase	hstA							AA		AA
AN2638	Putative hexokinase with a predicted role in carbohydrate metabolism	hxkB							A-B	A-B	A-B	A-B
AN2999	Putative isocitrate dehydrogenase (NADP+) with a predicted role in the TCA cycle; regulated by carbon source; alternative transcription start sites specify mitochondrial or cytoplasmic and peroxisomal protein localization	idpA									AA
AN10576	One module nonribosomal peptide synthetase (NRPS); N-acetyl-6-hydroxytryptophan (AHT) biosynthesis; mutant conidiophores, stalks, metulae, phialides lack pigmentation; secondary metabolism gene cluster member	ivoA							AB	AB
AN0231	Conidiophore-specific phenol oxidase; mutant conidiophores, metulae and phialides lack pigmentation; ivoB mutants accumulate the substrate N-acetyl-6-hydroxytryptophan (AHT); repressed by light in developmentally competent mycelia	ivoB	down			AA		up
AN10573	Putative cytochrome P450; transcrip/tionally coregulated with ivoA/AN10576	ivoC	down			AA		up
AN7731	Karyopherin; nuclear receptor; non-essential	kapN							AA		AA
AN5571	Putative oxoglutarate dehydrogenase (lipoamide) with a predicted role in the TCA cycle	kgdA							AA		AA
AN2463	Putative beta-galactosidase with a predicted role in lactose metabolism	lacF							AA		AA
AN3199	MFS sugar transporter; induced by lactose and galactose	lacpA							AA		AA
AN0887	Putative urea amidolyase with a predicted role in nitrogen metabolism; required for the utilization of lactams such as 2-pyrrolidinone	lamA							A-B	A-B	AA
AN0886	Protein with a predicted role in nitrogen metabolism; involved in the utilization of 2-pyrrolidinone as a nitrogen source	lamB							AA		AA
AN7193	Putative NADPH-dependent glycerol dehydrogenase with a predicted role in carbohydrate metabolism; transcript upregulated by growth in glycerol, by growth on xylose and after exposure to farnesol	larA							AA		AA
AN2793	Putative beta-isopropylmalate dehydrogenase with a predicted role in valine, leucine, and isoleucine metabolism; transcript is induced by nitrate	leu2B						down	AA		AA
AN7933	Putative LaeA-like methyltransferase	llmC		AA
AN5091	Putative LaeA-like methyltransferase	llmE									AA
AN5874	Putative LaeA-like methyltransferase	llmG						down	AA
AN3435	Putative zinc-finger transcription factor involved in blue-light responsive differentiation; interacts with LreB; similar to N. crassa blue-light-sensing component WC-1	lreA									AA
AN3607	Putative zinc-finger transcription factor involved in blue-light responsive differentiation; interacts with VeA, FphA, and LreA; similar to N. crassa blue-light-sensing component WC-2	lreB							AA		AA
AN6933	Putative malate dehydrogenase with a predicted role in oxidation of malate to pyruvate; transcript is induced by nitrate	maeB							AA		AA
AN10021	Regulatory protein; member of the monodictyphenone secondary metabolite biosynthesis gene cluster; similar to aflatoxin coactivator aflJ and O-methyltransferases; required for biosynthesis of monodictyphenone, a prenyl xanthone precursor	mdpA									AA
AN4900	Putative bZIP DNA-binding protein involved in regulating nitrogen metabolite repression	meaB							A/B	A/B
AN1181	Putative transporter with a predicted role in small molecule transport; ammonium permease	mepA				AA
AN4361	Putative basic region and leucine zipper (bZIP) transcriptional activator with a role in regulating sulfur metabolism; upregulated in A. oryzae and A. nidulans under hypoxic growth conditions	metR							AB	AB
AN10311	Putative hyphal cell wall mannoprotein; expression is transcriptionally upregulated during sexual development; expression is flbA-, fadA- and veA-dependent; present in the hyphal cell wall, absent from the conidial cell wall	mnpA	down			AA
AN3566	Putative alpha-mannosidase with a predicted role in mannose polymer metabolism	mns1C							AA		AA
AN1932	Putative methionine sulfoxide reductase with a predicted role in the reduction of methionine sulfoxide to methionine	msrB							AA		AA
AN2475	Putative sugar transporter	mstB							A-B	A-B	AA
AN7683	Eisosomal protein involved in eisosome stability; negatively regulates sphingolipid biosynthesis; ortholog of S. cerevisiae Nce102p	nce102	down	AA		AA			AA		AA
AN7500	Putative NADH dehydrogenase (ubiquinone) with a predicted role in energy metabolism; expression upregulated after exposure to farnesol	ndeA							AA		AA
AN20007	Mitochondrially encoded subunit 1 of NADH dehydrogenase	ndhA						up			AA
AN20002	Mitochondrially encoded subunit 2 of NADH dehydrogenase; note that the sequence represented in AspGD is N-terminally truncated relative to orthologous genes in other species	ndhB	up					up			AA
AN20008	Mitochondrially encoded subunit 4 of NADH dehydrogenase; sequence in AspGD is truncated at the 3' end	ndhD	up					up			AA
AN20001	Mitochondrially-encoded subunit 5 of NADH dehydrogenase	ndhE	up					up			AA
AN10660	Putative NADH dehydrogenase; pyridine nucleotide-disulfide oxidoreductase domain	ndiA							A-B	A-B	AA
AN6015	Has domain(s) with predicted DNA binding activity	ndtA	down	AA
AN8373	Putative GNAT-type acetyltransferase	ngn11							AA		AA
AN2479	Putative GNAT-type acetyltransferase	ngn16							AA		AA
AN3344	Putative GNAT-type acetyltransferase	ngn27	down	AA
AN4552	Ortholog of Ku80; 80 kDa subunit of Ku70/Ku80 complex involved in non-homologous double-stranded break repair	nkuB							AA		AA
AN1097	Ortholog(s) have role in proteolysis and cytoplasm localization	nnk1						down	AA
AN3361	Bacterial rhodopsin family G-protein coupled receptor-like protein	nopA	down	AA		AA		down	AA		AA
AN6044	Putative serine/threonine protein kinase of the PITSLRE superfamily involved in cell cycle progression during S phase and in DNA damage response; camptothecin induced	npkA							AA
AN0399	High-affinity nitrate transporter; transcription is induced by nitrate and repressed by ammonium; predicted NirA binding site in promoter	nrtB				AA
AN4917	p62 subunit of dynactin, component of the dynactin complex involved in nuclear distribution	nudR							AA		AA
AN20010	Mitochondrially encoded subunit 6 of the F0 sector of mitochondrial F1F0 ATP synthase; can mutate to confer oligomycin resistance	oliA	up					up			AA
AN1624	Subunit 9 of the mitochondrial inner membrane F1F0-ATPase complex; mutation confers oligomycin resistance; palA-dependent expression independent of pH	oliC							AA		AA
AN3441	Trehalose 6-phosphate phosphatase, predicted subunit of the trehalose-6-phosphate synthase/phosphatase complex; involved in chitin synthesis at elevated temperatures	orlA							AA		AA
AN20014	Subunit I of cytochrome c oxidase, which is the terminal member of the mitochondrial inner membrane electron transport chain; one of three mitochondrially-encoded subunits; 2nd and 3rd introns contain maturase-related open reading frames	oxiA	up					up			AA
AN20012	Subunit III of cytochrome c oxidase, which is the terminal member of the mitochondrial inner membrane electron transport chain; one of three mitochondrially-encoded subunits	oxiC	up					up			AA
AN10991	Ortholog(s) have 4-amino-4-deoxychorismate lyase activity and role in folic acid biosynthetic process	pabaB							AA		AA
AN4351	Protein involved in a signaling pathway that activates PacC transcription factor in response to alkaline ambient pH	palA									AA
AN1778	Putative ketopentoate hydroxymethyl transferase with a predicted role in Coenzyme A and pantothenate biosynthesis	pantoB							AA		AA
AN1599	Zn(II)(2)Cys(6)-type transcription factor; responsible for the production of the diterpene compound, ent-pimara-8(14),15-diene; member of the PbcR-activated diterpene cluster	pbcR	down			AA
AN0931	Mitogen activated protein kinase kinase (MAPKK) of the HOG signaling pathway that regulates osmotic stress response; mutants are sensitive to NaCl and 1.5 M sucrose	pbsA							AA		AA
AN4888	Putative pyruvate decarboxylase with a predicted role in pyruvate metabolism or penicillin biosynthesis; intracellular; protein abundance decreased by menadione stress	pdcA	down	AA		AA			AA		AA
AN2740	High-affinity cAMP phosphodiesterase	pdeB							AA
AN1901	Putative sterol 14 alpha-demethylase with a predicted role in sterol metabolism	pdmA	up	AA
AN0741	Pectate lyase involved in degradation of pectin; regulated by the carbon catabolite repression system	pelA						down	AA		AA
AN4416	Syntaxin; ortholog(s) have SNAP receptor activity, role in Golgi to vacuole transport, vacuole inheritance and Golgi apparatus, endosome localization	pepA							AA
AN3223	Putative 6-phosphofructokinase with a predicted role in gluconeogenesis and glycolysis; upregulated under hypoxic growth conditions	pfkA							AA		AA
AN5144	Putative 6-phosphofructo-2-kinase with a predicted role in mannose/mannitol, fructose, and sorbose/sorbitol metabolism	pfkZ							AA		AA
AN8327	Protein with polygalacturonase activity, involved in degradation of pectin	pgaC	down			AA
AN1246	Putative phosphoglycerate kinase with a predicted role in gluconeogenesis and glycolysis; intracellular, menadione stress-induced protein; promoter activity is greater on gluconeogenic than on glycolytic carbon sources	pgkA							AA		AA
AN3059	Putative phosphoglycerate mutase with a predicted role in gluconeogenesis and glycolysis; expression upregulated after exposure to farnesol	pgmA							AA		AA
AN2867	Putative phosphoglucomutase with a predicted role in carbohydrate metabolism; intracellular; protein abundance decreased by menadione stress; transcript levels increase during asexual development	pgmB							AA		AA
AN8761	Protein with polygalacturonase activity, involved in degradation of pectin	pgxA							AA		AA
AN6861	DUF1275 domain protein; possible prohibitin homolog	phbB							AA
AN8333	Protein required for normal phialide development; expression increased in the presence of bafilomycin B1 and concanamycin A; PhiA localizes to conidia and phialides	phiA	up			AA
AN4913	Putative phosphoketolase with a predicted role in the phosphoketolase pathway	phk		AA					AA		AA
AN3101	Putative histidine-containing phosphotransfer protein	phkB							AA		AA
AN5217	Protein with similarity to sphingolipid long chain base-responsive protein Pil1; putative conserved eiosome component; expression upregulated after farnesol exposure; present at the conidial periphery and in punctate structures in mycelia	pilA							A-B	A-B	AA
AN3931	Putative conserved eisosome protein	pilB							AA		AA
AN6305	cAMP-dependent protein kinase catalytic subunit; cAMP signaling during conidial germination; overlapping functions with SchA; induced by osmotic stress; mutant growth defect remediated by sucrose and NaCl; reduced growth on AVICEL medium	pkaA							AA		AA
AN4717	Cyclic AMP-dependent protein kinase A (PKA) catalytic subunit; deletion mutant has no phenotype; synthetically lethal with pkaA deletion	pkaB							AA		AA
AN4987	Putative protein kinase A (PKA) regulatory subunit	pkaR							AA		AA
AN3230	Polyketide synthase; predicted backbone enzyme of the aspernidine A secondary metabolism gene cluster	pkfA							AA		AA
AN3229	Putative aryl-alcohol oxidase-related protein; choline dehydrogenase; aspernidine A secondary metabolism gene cluster member	pkfF						down	AA		AA
AN6211	Putative phospholipase with a predicted role in phospholipid metabolism; calcium-dependent phospholipase A2 activity	plaA							AA		AA
AN0664	Putative 1-phosphatidylinositol-4,5-bisphosphate phosphodiesterase with a predicted role in phospholipid metabolism; directly linked to high-molecular-weight carbon source sensing	plcA	up								AA
AN6712	Putative phospholipase D; expression upregulated after exposure to farnesol	pldA	down	AB	AB				AA		AA
AN5333	Putative pectate lyase, involved in degradation of pectin	plyC				AA		down	AA		AA
AN5791	Predicted pheromone precursor; encodes two copies of a peptide similar to S. cerevisiae alpha-factor, which is subject to proteolytic processing	ppgA							AA
AN5028	Fatty acid oxygenase that plays a role in oxylipin biosynthesis; responsible for the formation of the psi-factor component psiB-beta; expression reduced after exposure to farnesol	ppoC	down			AA		down
AN0240	Putative transaldolase with a predicted role in the pentose-phosphate shunt; intracellular, menadione stress-induced protein; protein induced by farnesol	pppA							AA		AA
AN7743	Predicted G-protein coupled pheromone receptor; similar to S. cerevisiae Ste3; induced by growth on 1% glucose	preA							AA		AA
AN0914	Putative serine/threonine phosphatase	ptcD							AA
AN2943	Putative regulator of secondary metabolism	rfeA	down	AA		AA		down
AN6395	Protein with rhamnogalacturonan lyase activity, involved in degradation of pectin	rglB							AA		AA
AN8803	Hydrophobin; protein involved in conidium development; required for the formation of outer hydrophobic layer (rodlet layer) of the conidium wall; transcriptionally regulated by BrlA; predicted glycosylphosphatidylinositol (GPI)-anchor	rodA	down			AA		up
AN4790	Putative RNA-directed RNA polymerase	rrpB						down	AA
AN4770	Adenosine 3-phosphate 5-phosphosulfate (PAPS) reductase involved in sulfate assimilation	sA						up	AA		AA
AN2350	L-amino acid oxidase enzyme with broad substrate specificity	sarA	down			AA		down
AN3417	Putative malonyl CoA synthetase; required for conidial germination	sgdD							AA		AA
AN10080	Ferricrocin (FC) biosynthetic transacetylase; siderophore biosynthetic enzyme	sidL							AA		AA
AN5577	Manganese-superoxide dismutase	sodB							AA		AA
AN10628	Conidium-specific RNA of unknown function; member of the SpoC1 gene cluster	SpoC1-C1C	down	AA					AA		AA
AN5086	Conidium-specific RNA of unknown function; member of the SpoC1 gene cluster	SpoC1-C1D	down						A-B	A-B	AA
AN0069	Putative protein transport protein	srgL							AA		AA
AN7185	Putative protein serine/threonine kinase; mutants are sensitive to NaCl and have a moderate growth defect	srpkA							AA
AN10325	Has domain(s) with predicted ATP binding, protein kinase activity, protein tyrosine kinase activity, transferase activity, transferring phosphorus-containing groups activity and role in protein phosphorylation	srpkD	down			AA
AN10937	Has domain(s) with predicted ATP binding, protein kinase activity, transferase activity, transferring phosphorus-containing groups activity and role in protein phosphorylation	srpkE		AA
AN20048	Mitochondrial 15S rRNA of the small ribosomal subunit	S-rRNA	up								AA
AN12027	Non-essential protein of unknown function, similar to MvlA	ssmA	down					down	AA
AN6347	Has domain(s) with predicted ATP binding, protein kinase activity, protein tyrosine kinase activity and role in protein phosphorylation	stk26							AA		AA
AN1665	Has domain(s) with predicted ATP binding, protein kinase activity, protein tyrosine kinase activity and role in protein phosphorylation	stk51							AA
AN3034	Suppressor of prgA1 mutation; involved in regulation of penicillin biosynthesis; null mutation results in decreased expression of ipnA and acvA, and reduced penicillin production	suAprgA1							AA		AA
AN4615	Transmembrane domain-containing protein with homology to S. cerevisiae Sur7p; SurG-GFP localizes perinuclearly and to patches in the periphery of spores and to the vacuole and endosomes of hyphae	surG	down						AA		AA
tA(AGC)5	tRNA-Ala, predicted by tRNAscan-SE; AGC anticodon	tA(AGC)5	down					down	A-B	A-B	AA
tA(AGC)6	tRNA-Ala, predicted by tRNAscan-SE; AGC anticodon	tA(AGC)6							AB	AB
AN6900	Putative triose-phosphate isomerase with a predicted role in gluconeogenesis and glycolysis; protein induced by farnesol	tpiA							AA		AA
AN5523	Putative alpha,alpha-trehalose-phosphate synthase (UDP-forming) with a role in trehalose biosynthesis; transcriptionally induced during spore germination and exponential growth; required for viability of conidia during prolonged storage	tpsA							A-B	A-B	AA
tR(ACG)2	tRNA-Arg, predicted by tRNAscan-SE; ACG anticodon	tR(ACG)2							AA		AA
AN5635	Putative alpha, alpha-trehalase with a predicted role in trehalose hydrolysis	treB							AA		AA
AN5636	Has domain(s) with predicted cation transmembrane transporter activity, potassium ion transmembrane transporter activity and role in cation transport, potassium ion transmembrane transport, transmembrane transport	trkA							AA		AA
AN6932	High-capacity, high-affinity uric acid-xanthine permease; induced by purine; positively regulated by uaY; under ammonium repression by AreA; localized to plasma membrane and strongly expressed in periphery of metulae	uapA				AA
AN0418	Putative high-affinity urea/H+ symporter; regulated by nitrogen catabolite repression; transcript upregulated by nitrate limitation	ureA				AA
AN4578	Transcript that overlaps the 5' coding sequence of the fmdS gene; expression interferes with fmdS transcription; putative transmembrane-domain protein	usgS							AA		AA
AN0471	Putative vacuolar H+/Ca2+ exchanger	vcxA							AA
AN1959	Nuclear protein involved in spore formation and trehalose accumulation; potential transcription-activating domain; mutants have low spore viability; two overlapping transcripts; VosA-VelB form a dimeric complex in hyphae grown in the dark	vosA							AA
AN7037	Putative ESCRT II complex required for trafficking from the membrane to the vacuoles; essential for pH signaling	vps36							AA		AA
AN8209	Polyketide synthase involved in biosynthesis of the dark green pigment in the conidium wall that contributes to UV resistance; mutants produce white colonies due to colorless conidia; member of secondary metabolite gene cluster with AN8210	wA							AA		AA
AN1937	Regulatory protein involved in conidial development; activates conidium-specific gene expression; mutant conidia lack pigment and autolyze before maturation	wetA							AA
AN1542	Protein with oligoxyloglucan reducing end-specific cellobiohydrolase activity, involved in degradation of xyloglucans	xgcA	up					down	AA		AA
AN5061	Putative xyloglucanase	xgeB							AA		AA
AN9365	Protein with endo-1,4-beta-xylanase activity, involved in degradation of xylans	xlnB						down	AA
AN2359	Beta-xylosidase, involved in degradation of xylans; transcriptionally induced by growth on xylose	xlnD						down	AB	AB
AN6412	Putative xylose transporter	xtrA				A/B	A/B
AN2005	Histidine-containing phosphotransfer protein, part of a two-component signal transducer involved in the HOG signaling pathway that regulates osmotic stress response	ypdA							AA		AA
AN6398	Ortholog(s) have intracellular localization		down	AA		AA			AA		AA
AN8480	Putative glucan 1,3-beta-glucosidase with a predicted role in glucan metabolism		down	AA
AN3255	Predicted glutathione peroxidase; predicted secondary metabolism gene cluster member		down	AA					AA		AA
AN7590	Putative reductase with a predicted role in carbohydrate metabolism; mannitol 2-dehydrogenase; intracellular, menadione stress-induced protein; HapX-regulated; protein induced by farnesol		down	AA					AA		AA
AN9180	Putative transketolase; intracellular; protein abundance decreased by menadione stress		down	AA		AA			AA		AA
AN0337	Ortholog of A. fumigatus Af293 : Afu1g07195, A. niger CBS 513.88 : An07g09780, A. oryzae RIB40 : AO090012000973, Aspergillus wentii : Aspwe1_0028307 and Aspergillus sydowii : Aspsy1_0047732		down	AA		AA			AA		AA
AN0467	Ortholog of A. nidulans FGSC A4 : AN0468, A. fumigatus Af293 : Afu1g01350, Afu1g04310, A. niger CBS 513.88 : An12g10460 and Aspergillus wentii : Aspwe1_0169394		down	AA		AA		down	A-B	A-B	AA
AN0468	Ortholog of A. nidulans FGSC A4 : AN0467, A. fumigatus Af293 : Afu1g01350, Afu1g04310, A. niger CBS 513.88 : An12g10460 and Aspergillus wentii : Aspwe1_0169394		down	AA		AA		down	A-B	A-B	AA
AN0482	Putative ubiquitin-conjugating enzyme; transcript repressed by nitrate		down	AA		AA		down	A/B	A/B
AN0540	Ortholog of Neosartorya fischeri NRRL 181 : NFIA_056010, Aspergillus versicolor : Aspve1_0065547 and Aspergillus sydowii : Aspsy1_0048566, Aspsy1_0081349		down	AA
AN0693	Transcript induced by light in in developmentally competent mycelia		down	AA		AA			AA		AA
AN0860	Ortholog of A. fumigatus Af293 : Afu1g15260, A. niger CBS 513.88 : An01g13370, A. oryzae RIB40 : AO090103000449, AO090005001207 and Aspergillus wentii : Aspwe1_0111296		down	AA		AA
AN10060	Putative alpha-amylase; glycogen debranching enzyme		down	AA		AA			AA		AA
AN10368	Has domain(s) with predicted carbon-sulfur lyase activity and role in metabolic process		down	AA		AA			A-B	A-B	AA
AN10392	Has domain(s) with predicted FAD binding, UDP-N-acetylmuramate dehydrogenase activity, flavin adenine dinucleotide binding, oxidoreductase activity, acting on CH-OH group of donors activity and role in oxidation-reduction process		down	AA
AN10398	Has domain(s) with predicted ADP binding activity and role in defense response		down	AA					A/B	A/B
AN10399	Has domain(s) with predicted oxidoreductase activity and role in metabolic process		down	AA
AN10421	Has domain(s) with predicted hydrolase activity		down	AA					A-B	A-B	AA
AN10422	Protein of unknown function		down	AA		AA		down	AA		AA
AN10626	Ortholog(s) have intracellular localization		down	AA					AA		AA
AN10629	Has domain(s) with predicted role in lipid metabolic process		down	AA					AA		AA
AN10631	Protein of unknown function		down	AA					AA		AA
AN10782	Putative mitochondrial phosphate carrier protein; expression upregulated after exposure to farnesol		down	AA		AA			A-B	A-B	AA
AN10812	Protein of unknown function; transcript repressed by nitrate		down	AA
AN10974	Has domain(s) with predicted methyltransferase activity		down	AA					AA		AA
AN10996	Ortholog(s) have hercynylcysteine sulfoxide synthase, hercynylselenocysteine synthase, histidine N-methyltransferase activity		down	AA					AA		AA
AN11079	Protein of unknown function		down	AA				down
AN11161	Has domain(s) with predicted phosphatidylserine decarboxylase activity and role in phospholipid biosynthetic process		down	AA		AA			A-B	A-B	AA
AN11280	Protein of unknown function		down	AA				down
AN11766	Ortholog of A. fumigatus Af293 : Afu3g07660, A. oryzae RIB40 : AO090020000405, Neosartorya fischeri NRRL 181 : NFIA_069490 and Aspergillus wentii : Aspwe1_0173499		down	AA		AA			AA		AA
AN11985	Ortholog of A. fumigatus Af293 : Afu3g01210, A. niger CBS 513.88 : An01g10950, A. oryzae RIB40 : AO090026000081, Aspergillus wentii : Aspwe1_0103451 and Aspergillus terreus NIH2624 : ATET_07760		down	AA					AA		AA
AN12102	Has domain(s) with predicted identical protein binding, serine-type endopeptidase activity and role in negative regulation of catalytic activity		down	AA				down	A-B	A-B	A-B	A-B
AN12130	Ortholog of Aspergillus glaucus : Aspgl1_0163193, Neosartorya fischeri NRRL 181 : NFIA_061920 and Aspergillus versicolor : Aspve1_0089422		down	AA					A-B	A-B	AA
AN12375	Protein of unknown function		down	AA				down
AN12424	Protein of unknown function		down	AA				down
AN1322	Has domain(s) with predicted GTP binding, GTPase activity		down	AA
AN1852	Putative chitin deacetylase		down	AA
AN20052	Protein of unknown function		down	AA				up
AN20054	Protein of unknown function		down	AA
AN2314	Putative 1,4-alpha-glucan branching enzyme with a predicted role in starch metabolism		down	AA					AA
AN2470	Ortholog(s) have role in cellular detoxification of nitrogen compound, cellular response to nitrosative stress		down	AA		AA			AA		AA
AN2535	Ortholog of A. fumigatus Af293 : Afu3g14660, A. niger CBS 513.88 : An09g01230, Aspergillus wentii : Aspwe1_0107397, Aspwe1_0171355 and Aspergillus sydowii : Aspsy1_0087029		down	AA		AA			AA		AA
AN2557	Ortholog of Aspergillus versicolor : Aspve1_0171321		down	AA				down
AN2594	Ortholog of A. nidulans FGSC A4 : AN7988, A. fumigatus Af293 : Afu6g03330, A. oryzae RIB40 : AO090020000705, Aspergillus flavus NRRL 3357 : AFL2T_10650 and Neosartorya fischeri NRRL 181 : NFIA_049690		down	AA					AA		AA
AN2604	Ortholog of Aspergillus sydowii : Aspsy1_0439518		down	AA				down
AN2640	Ortholog of A. fumigatus Af293 : Afu5g14080, A. niger CBS 513.88 : An12g05640, Neosartorya fischeri NRRL 181 : NFIA_072900 and Aspergillus versicolor : Aspve1_0040725		down	AA					AA		A-B	A-B
AN2662	Has domain(s) with predicted amidase activity, carbon-nitrogen ligase activity, with glutamine as amido-N-donor activity		down	AA					AA		AA
AN2726	Protein of unknown function		down	AA
AN2779	Has domain(s) with predicted catalytic activity, hydrolase activity, iron-sulfur cluster binding activity		down	AA
AN2823	Has domain(s) with predicted mechanosensitive ion channel activity, role in ion transmembrane transport and integral component of membrane localization		down	AA					AA		AA
AN2894	Ortholog of A. fumigatus Af293 : Afu3g11550, A. niger CBS 513.88 : An02g07350, A. oryzae RIB40 : AO090003000710, Aspergillus wentii : Aspwe1_0025131 and Aspergillus sydowii : Aspsy1_0775782		down	AA		AA			AA		AA
AN2921	Ortholog of A. nidulans FGSC A4 : AN4177, AN12488, A. fumigatus Af293 : Afu8g00600, A. niger CBS 513.88 : An03g00920, An02g01430, A. oryzae RIB40 : AO090010000696 and Aspergillus wentii : Aspwe1_0029035		down	AA				down
AN3021	Ortholog of A. fumigatus Af293 : Afu3g08920, A. niger CBS 513.88 : An16g02420, A. oryzae RIB40 : AO090005001345, Aspergillus wentii : Aspwe1_0052288 and Aspergillus sydowii : Aspsy1_0147269		down	AA
AN3200	Putative beta-glucuronidase with a predicted role in polysaccharide degradation; the predicted pseudogene AN10383 and predicted ORF AN3200 occupy overlapping chromosomal locations in version 4 of the A. nidulans annotation		down	AA		AA			AA		AA
AN3305	Has domain(s) with predicted oxidoreductase activity and role in metabolic process		down	AA					A-B	A-B	A-B	A-B
AN3314	Has domain(s) with predicted carbon-sulfur lyase activity and role in metabolic process		down	AA				down	A-B	A-B	AA
AN3316	Protein of unknown function		down	AA
AN3334	Protein of unknown function		down	AA		AA			A-B	A-B	AA
AN3342	Ortholog of A. nidulans FGSC A4 : AN10302, AN4609, A. fumigatus Af293 : Afu7g06670, A. niger CBS 513.88 : An04g04320, An16g05670, An04g03250 and A. oryzae RIB40 : AO090011000012		down	AA
AN3356	Has domain(s) with predicted DNA binding, DNA-binding transcription factor activity, RNA polymerase II-specific, zinc ion binding activity and role in regulation of transcription, DNA-templated, transcription, DNA-templated		down	AA				down
AN3395	Protein of unknown function; coregulated (with micA/AN3396 and AN3394) secondary metabolism cluster member		down	AA
AN3480	Ortholog of A. niger CBS 513.88 : An11g08860, Neosartorya fischeri NRRL 181 : NFIA_008010, Aspergillus niger ATCC 1015 : 48080-mRNA and Aspergillus sydowii : Aspsy1_0166071		down	AA					A-B	A-B	A-B	A-B
AN3517	Ortholog of Aspergillus sydowii : Aspsy1_0162744		down	AA
AN3518	Ortholog of A. fumigatus Af293 : Afu3g03810, Neosartorya fischeri NRRL 181 : NFIA_006070, Aspergillus versicolor : Aspve1_0034466 and Aspergillus niger ATCC 1015 : 43711-mRNA		down	AA				down
AN3519	Ortholog of A. nidulans FGSC A4 : AN2646, AN0587, AN0866, AN7370 and A. fumigatus Af293 : Afu1g15200, Afu3g03790, Afu4g14040, Afu5g06900, Afu7g08575		down	AA				down
AN3558	Has domain(s) with predicted carbon-sulfur lyase activity and role in metabolic process		down	AA					AA		AA
AN3627	Ortholog(s) have intracellular localization		down	AA					AA		AA
AN3703	Ortholog of A. fumigatus Af293 : Afu3g02990, Neosartorya fischeri NRRL 181 : NFIA_004810, Aspergillus wentii : Aspwe1_0643479 and Aspergillus versicolor : Aspve1_0042072		down	AA		AA			AA		AA
AN3883	Putative glucanase with a predicted role beta-glucan hydrolysis		down	AA					AA		AA
AN3952	Has domain(s) with predicted ATP binding, ATPase activity, ATPase-coupled transmembrane transporter activity, nucleoside-triphosphatase activity, nucleotide binding activity and role in transmembrane transport		down	AA					AA		AA
AN3979	Ortholog of A. nidulans FGSC A4 : AN12192, Aspergillus flavus NRRL 3357 : AFL2T_09411, Aspergillus versicolor : Aspve1_0043435 and Aspergillus sydowii : Aspsy1_0051867		down	AA
AN3983	Ortholog of Aspergillus wentii : Aspwe1_0168245, Aspergillus clavatus NRRL 1 : ACLA_062140 and Aspergillus aculeatus ATCC16872 : Aacu16872_043723		down	AA
AN3988	Has domain(s) with predicted metal ion transmembrane transporter activity, role in metal ion transport, transmembrane transport and membrane localization		down	AA
AN3996	Has domain(s) with predicted methyltransferase activity and role in metabolic process		down	AA		AA		down	AA
AN4119	Putative major facilitator superfamily protein; transcript upregulated in response to camptothecin		down	AA
AN4256	Ortholog of A. fumigatus Af293 : Afu7g04030, A. oryzae RIB40 : AO090012000139, Neosartorya fischeri NRRL 181 : NFIA_099750 and Aspergillus versicolor : Aspve1_0055292		down	AA					A-B	A-B	AA
AN5017	Has domain(s) with predicted oxidoreductase activity and role in metabolic process		down	AA		AA		down	A-B	A-B	A-B	A-B
AN5332	Ortholog(s) have intracellular localization		down	AA					AA		AA
AN5408	Has domain(s) with predicted RNA binding, ribonuclease III activity and role in RNA processing		down	AA
AN6005	Ortholog of A. fumigatus Af293 : Afu2g10020, A. niger CBS 513.88 : An16g05030, Neosartorya fischeri NRRL 181 : NFIA_085440, Aspergillus wentii : Aspwe1_0176252 and Aspergillus versicolor : Aspve1_0040814		down	AA					AA		AA
AN6135	Putative phosphogluconate dehydrogenase; predicted role in the pentose-phosphate shunt		down	AA
AN6382	Has domain(s) with predicted phosphoric diester hydrolase activity and role in lipid metabolic process		down	AA
AN6399	Putative bleomycin hydrolase		down	AA
AN6658	Has domain(s) with predicted oxidoreductase activity and role in oxidation-reduction process		down	AA							AB	AB
AN6763	Ortholog of A. fumigatus Af293 : Afu3g11800, Neosartorya fischeri NRRL 181 : NFIA_065520, Aspergillus fumigatus A1163 : AFUB_037380 and Aspergillus clavatus NRRL 1 : ACLA_039690		down	AA
AN6770	Predicted amino acid transmembrane transporter		down	AA				down
AN6839	Protein of unknown function		down	AA				up
AN6849	Ortholog(s) have role in cellular response to heat, cellular response to hydrogen peroxide		down	AA		AA		down
AN6881	Ortholog of A. fumigatus Af293 : Afu8g07160, A. niger CBS 513.88 : An03g01630, Neosartorya fischeri NRRL 181 : NFIA_099950 and Aspergillus versicolor : Aspve1_0035247		down	AA		AA		down	A-B	A-B	AA
AN6952	Has domain(s) with predicted O-methyltransferase activity		down	AA				down
AN7033	Ortholog of A. fumigatus Af293 : Afu4g04190, A. niger CBS 513.88 : An14g00640, A. oryzae RIB40 : AO090206000078, Aspergillus wentii : Aspwe1_0174608 and Aspergillus sydowii : Aspsy1_0427823		down	AA					AA
AN7087	Ortholog of A. fumigatus Af293 : Afu8g07170, A. oryzae RIB40 : AO090005000253, Neosartorya fischeri NRRL 181 : NFIA_099960, Aspergillus wentii : Aspwe1_0038547 and Aspergillus versicolor : Aspve1_0046531		down	AA
AN7217	Protein of unknown function		down	AA				down	AB	AB
AN7251	Has domain(s) with predicted FAD binding, oxidoreductase activity and role in metabolic process		down	AA				up
AN7263	Ortholog of A. oryzae RIB40 : AO090012000392, AO090009000463, Aspergillus tubingensis : Asptu1_0036805, Aspergillus flavus NRRL 3357 : AFL2T_03298 and Aspergillus kawachii : Aspka1_0181434		down	AA
AN7580	Ortholog of A. fumigatus Af293 : Afu2g15110, A. niger CBS 513.88 : An15g02960, A. oryzae RIB40 : AO090012000329, Aspergillus wentii : Aspwe1_0044605 and Aspergillus sydowii : Aspsy1_0046014		down	AA
AN7592	Has domain(s) with predicted DNA-binding transcription factor activity, DNA-binding transcription factor activity, RNA polymerase II-specific, zinc ion binding activity and role in regulation of transcription, DNA-templated		down	AA				down
AN7799	Protein expressed at increased levels during osmoadaptation; short-chain alcohol dehydrogenase domain		down	AA		AA			AA		AA
AN7822	Ortholog of A. fumigatus Af293 : Afu5g00770, Aspergillus brasiliensis : Aspbr1_0058805, N. fischeri NRRL 181 : NFIA_041410, Aspergillus flavus NRRL 3357 : AFL2T_07218 and A. clavatus NRRL 1 : ACLA_004530		down	AA				down
AN7826	Ortholog of Aspergillus glaucus : Aspgl1_0116635, Aspergillus versicolor : Aspve1_0045384 and Aspergillus sydowii : Aspsy1_0165058		down	AA		AA			AA		AA
AN7836	Ortholog of A. fumigatus Af293 : Afu7g01060, A. oryzae RIB40 : AO090003000833, Neosartorya fischeri NRRL 181 : NFIA_113770 and Aspergillus terreus NIH2624 : ATET_02590		down	AA		AA
AN7850	Ortholog of A. fumigatus Af293 : Afu4g14030, A. oryzae RIB40 : AO090001000391, Neosartorya fischeri NRRL 181 : NFIA_102290, Aspergillus wentii : Aspwe1_0046564 and Aspergillus terreus NIH2624 : ATET_02187		down	AA					AA		AA
AN7939	Ortholog(s) have intracellular localization		down	AA		AA
AN7959	Ortholog of A. fumigatus Af293 : Afu5g12830, A. oryzae RIB40 : AO090120000409, Neosartorya fischeri NRRL 181 : NFIA_074340, Aspergillus wentii : Aspwe1_0449236 and Aspergillus versicolor : Aspve1_0175438		down	AA					AA		AA
AN7999	Has domain(s) with predicted oxidoreductase activity and role in metabolic process		down	AA				down
AN8086	Putative protein of unknown function; expression upregulated after exposure to farnesol		down	AA		AA			AA		A-B	A-B
AN8145	Ortholog of S. cerevisiae : YML079W, Aspergillus versicolor : Aspve1_0040086, Aspergillus zonatus : Aspzo1_0075542 and Aspergillus sydowii : Aspsy1_0043162		down	AA
AN8146	Protein of unknown function		down	AA				down
AN8195	Protein of unknown function		down	AA		AA			AA		AA
AN8330	Has domain(s) with predicted oxidoreductase activity, transferase activity, transferring acyl groups other than amino-acyl groups, zinc ion binding activity and role in oxidation-reduction process		down	AA		AA			AA		AA
AN8339	Transcript induced by light in in developmentally competent mycelia		down	AA		AA			AA		AA
AN8368	Ortholog of A. nidulans FGSC A4 : AN2952, A. fumigatus Af293 : Afu3g07900, Afu4g14080, Afu8g00900, A. niger CBS 513.88 : An02g11330, An03g05560 and A. oryzae RIB40 : AO090120000471		down	AA				down
AN8369	Has domain(s) with predicted role in biosynthetic process		down	AA		AA		down
AN8370	Has domain(s) with predicted FAD binding, oxidoreductase activity and role in metabolic process		down	AA				down
AN8433	Has domain(s) with predicted catalytic activity and role in metabolic process		down	AA
AN8524	Has domain(s) with predicted catalytic activity and role in nucleoside metabolic process		down	AA
AN8561	Has domain(s) with predicted oxidoreductase activity and role in metabolic process		down	AA					AA
AN8592	Has domain(s) with predicted FAD binding, oxidoreductase activity and role in metabolic process		down	AA					AA		AA
AN8612	Ortholog of Aspergillus versicolor : Aspve1_0136952 and Aspergillus sydowii : Aspsy1_0157571		down	AA				down
AN8639	Putative alpha,alpha-trehalose-phosphate synthase (UDP-forming) with a predicted role in trehalose biosynthesis		down	AA		AA			A-B	A-B	A-B	A-B
AN8642	Has domain(s) with predicted oxidoreductase activity		down	AA					A-B	A-B	AA
AN8714	Protein of unknown function		down	AA					AA		AA
AN8727	Ortholog of A. nidulans FGSC A4 : AN3303, AN3346, AN3348, AN2044 and A. fumigatus Af293 : Afu4g10080, Afu7g00420, Afu8g06100, Afu4g01242		down	AA				down
AN8931	Ortholog of A. fumigatus Af293 : Afu1g10120, A. niger CBS 513.88 : An08g01940, A. oryzae RIB40 : AO090038000421, Aspergillus wentii : Aspwe1_0048983 and Aspergillus sydowii : Aspsy1_0044402		down	AA
AN8974	Protein of unknown function		down	AA					AA		AA
AN9002	Predicted monooxygenase; predicted secondary metabolism gene cluster member		down	AA					A-B	A-B	AA
AN9037	Has domain(s) with predicted molybdenum ion binding, molybdopterin cofactor binding, oxidoreductase activity and role in oxidation-reduction process		down	AA					AA		AA
AN9123	Ortholog of Aspergillus brasiliensis : Aspbr1_0040215, Aspbr1_0678615, Aspergillus wentii : Aspwe1_0041389, Aspergillus versicolor : Aspve1_0140141 and Aspergillus niger ATCC 1015 : 183284-mRNA		down	AA		AA			AA		AA
AN9162	Putative acyl-coA dehydrogenase		down	AA		AA
AN9178	Has domain(s) with predicted UDP-N-acetylmuramate dehydrogenase activity, electron transfer activity, flavin adenine dinucleotide binding, iron-sulfur cluster binding, metal ion binding, oxidoreductase activity		down	AA
AN9314	Protein with homology to entkaurene synthases; prediction backbone enzyme of a secondary metabolite biosynthesis gene cluster		down	AA				down
AN9441	Ortholog(s) have (R)-carnitine transmembrane transporter activity, choline transmembrane transporter activity, ethanolamine transmembrane transporter activity		down	AA
AN9456	Has domain(s) with predicted role in transmembrane transport and integral component of membrane localization		down	AA
AN9513	Has domain(s) with predicted transferase activity, transferring acyl groups other than amino-acyl groups activity		down	AA
AN0457	Protein of unknown function		down	A/B	A/B
AN0525	Has domain(s) with predicted oxidoreductase activity		down	A/B	A/B
AN0759	Ortholog of A. nidulans FGSC A4 : AN10907, A. fumigatus Af293 : Afu1g14190, Afu5g00975, A. niger CBS 513.88 : An01g12200 and A. oryzae RIB40 : AO090005000951		down	A/B	A/B			down	A-B	A-B	A-B	A-B
AN10242	Protein of unknown function		down	A/B	A/B			up
AN10297	Protein with similarity to nonribosomal peptide synthases (NRPS-like); putative acyl CoA synthetase with an NAD-binding domain		down	A/B	A/B	AA		down	A-B	A-B
AN1088	Ortholog of A. fumigatus Af293 : Afu4g14470/tpcK, Afu8g00430, A. niger CBS 513.88 : An07g00070, An07g00010, An02g08300, An11g06450 and A. oryzae RIB40 : AO090001000323		down	A/B	A/B			up
AN11210	Protein of unknown function; transcript repressed by nitrate		down	A/B	A/B			down
AN11374	Protein of unknown function		down	A/B	A/B			down
AN2043	Has domain(s) with predicted amino acid transmembrane transporter activity, role in amino acid transmembrane transport and membrane localization		down	A/B	A/B			up
AN2044	Ortholog of A. nidulans FGSC A4 : AN3303, AN3346, AN3348, AN8727 and A. fumigatus Af293 : Afu4g10080, Afu7g00420, Afu8g06100, Afu4g01242		down	A/B	A/B			up
AN2407	Has domain(s) with predicted role in isoprenoid biosynthetic process		down	A/B	A/B
AN2546	Predicted glycosylphosphatidylinositol (GPI)-anchored protein; embedded within the emericellamide (eas) biosynthetic gene cluster		down	A/B	A/B	AA
AN2832	Ortholog of Aspergillus sydowii : Aspsy1_0060442		down	A/B	A/B			down
AN3384	Ortholog(s) have trichothecene 3-O-acetyltransferase activity and role in mycotoxin catabolic process		down	A/B	A/B			down
AN3385	Putative transcription factor; predicted role in secondary metabolite production		down	A/B	A/B			down
AN3557	Has domain(s) with predicted catalytic activity and role in nucleoside metabolic process		down	A/B	A/B				AA		AA
AN3567	Ortholog of Aspergillus wentii : Aspwe1_0105538, Aspergillus versicolor : Aspve1_0195944 and Aspergillus sydowii : Aspsy1_0057674		down	A/B	A/B	AA
AN4198	Has domain(s) with predicted oxidoreductase activity and role in oxidation-reduction process		down	A/B	A/B			down
AN6809	Ortholog of A. fumigatus Af293 : Afu5g00680, A. niger CBS 513.88 : An16g00250, A. oryzae RIB40 : AO090010000081, Neosartorya fischeri NRRL 181 : NFIA_041480 and Aspergillus wentii : Aspwe1_0041410		down	A/B	A/B				AA		AA
AN7058	Protein of unknown function		down	A/B	A/B			down
AN7222	NACHT domain-containing protein; transcript is induced by nitrate		down	A/B	A/B	AA		down
AN7264	Ortholog of A. fumigatus Af293 : Afu4g14460/tpcM, A. niger CBS 513.88 : An06g02170, A. oryzae RIB40 : AO090001000622, Aspergillus wentii : Aspwe1_0233835 and Aspergillus sydowii : Aspsy1_0090692		down	A/B	A/B
AN9300	Ortholog of Aspergillus wentii : Aspwe1_0049669		down	A/B	A/B
AN10847	Protein of unknown function		down	AB	AB			down	A-B	A-B	AA
AN3024	Ortholog of A. fumigatus Af293 : Afu3g08880, A. oryzae RIB40 : AO090005001351, Neosartorya fischeri NRRL 181 : NFIA_068240, Aspergillus wentii : Aspwe1_0173345 and Aspergillus versicolor : Aspve1_0039444		down	AB	AB				AA		AA
AN3085	Ortholog(s) have role in cellular response to biotic stimulus, cellular response to starvation and filamentous growth of a population of unicellular organisms in response to biotic stimulus, more		down	AB	AB
AN5480	Putative RNA binding protein; menadione stress-induced protein		down	AB	AB				A-B	A-B	AA
AN5994	Ortholog(s) have ATP-dependent NAD(P)H-hydrate dehydratase activity and role in nicotinamide nucleotide metabolic process		down	AB	AB				AA		AA
AN7797	Has domain(s) with predicted role in transmembrane transport and integral component of membrane localization		down	AB	AB				A-B	A-B	A-B	A-B
AN8636	Has domain(s) with predicted DNA binding, DNA-binding transcription factor activity, RNA polymerase II-specific, zinc ion binding activity and role in regulation of transcription, DNA-templated, transcription, DNA-templated		down	AB	AB			down	A-B	A-B	AA
AN8956	Has domain(s) with predicted inorganic phosphate transmembrane transporter activity, role in phosphate ion transport and membrane localization		down	AB	AB				AA		AA
AN0045	Transcript induced by light in in developmentally competent mycelia		down	A-B	A-B	AA			AA		AA
AN10678	Ortholog of A. fumigatus Af293 : Afu4g11810, A. oryzae RIB40 : AO090003001035, Aspergillus wentii : Aspwe1_0033965, Aspergillus sydowii : Aspsy1_0043963 and Aspergillus terreus NIH2624 : ATET_03902		down	A-B	A-B	AA		down	A-B	A-B	A-B	A-B
AN11016	Has domain(s) with predicted role in transmembrane transport and integral component of membrane localization		down	A-B	A-B			down	A-B	A-B	A-B	A-B
AN11314	Ortholog of Aspergillus glaucus : Aspgl1_0053511, Aspergillus versicolor : Aspve1_0037663 and Aspergillus sydowii : Aspsy1_0038825		down	A-B	A-B	AA			AA		AA
AN12198	Ortholog of A. fumigatus Af293 : Afu2g15810, A. niger CBS 513.88 : An15g06100, Aspergillus wentii : Aspwe1_0026874 and Aspergillus sydowii : Aspsy1_0026968		down	A-B	A-B	AA			A-B	A-B	AA
AN1625	Ortholog of A. nidulans FGSC A4 : AN8147, A. fumigatus Af293 : Afu3g01080, Afu3g12760, A. niger CBS 513.88 : An02g08740 and A. oryzae RIB40 : AO090012000846, AO090023000643		down	A-B	A-B				AA		AA
AN1814	Protein of unknown function		down	A-B	A-B			down	A-B	A-B
AN2404	Ortholog of A. fumigatus Af293 : Afu8g05810, A. niger CBS 513.88 : An15g04670, A. oryzae RIB40 : AO090005000570, Aspergillus wentii : Aspwe1_0118486 and Aspergillus sydowii : Aspsy1_0039439		down	A-B	A-B	AA			A-B	A-B	AA
AN2554	Ortholog of A. fumigatus Af293 : Afu1g06730, A. niger CBS 513.88 : An18g05780, A. oryzae RIB40 : AO090001000761, Aspergillus wentii : Aspwe1_0067057 and Aspergillus sydowii : Aspsy1_0086988		down	A-B	A-B	AA			AA		AA
AN2565	Has domain(s) with predicted role in polyketide metabolic process		down	A-B	A-B
AN4299	Putative clock-controlled and temperature-regulated gene; transcript induced by light in in developmentally competent mycelia		down	A-B	A-B	AA			AA		AA
AN5004	Transcript induced by light in in developmentally competent mycelia		down	A-B	A-B	AA			A-B	A-B	AA
AN5056	Homologous to ccg-1 from N. crassa; transcript induced by light in in developmentally competent mycelia		down	A-B	A-B	AA			AA		AA
AN5624	Ortholog of A. fumigatus Af293 : Afu4g11110, A. oryzae RIB40 : AO090003001108, Aspergillus wentii : Aspwe1_0055997, Aspergillus sydowii : Aspsy1_0043834 and Aspergillus terreus NIH2624 : ATET_03968		down	A-B	A-B	AA			AA		AA
AN6274	Has domain(s) with predicted oxidoreductase activity and role in metabolic process		down	A-B	A-B	AA			AA		AA
AN6301	Protein of unknown function		down	A-B	A-B	AA			AA		AA
AN6404	Has domain(s) with predicted zinc ion binding activity		down	A-B	A-B	AA		down	A-B	A-B
AN6856	Ortholog of A. fumigatus Af293 : Afu5g13100, A. niger CBS 513.88 : An14g06050, A. oryzae RIB40 : AO090120000435, Aspergillus wentii : Aspwe1_0107169 and Aspergillus sydowii : Aspsy1_0040420		down	A-B	A-B	AA			AA		AA
AN7558	Transcript induced by light in in developmentally competent mycelia		down	A-B	A-B			down	AA		AA
AN7960	Ortholog of A. niger CBS 513.88 : An18g04120, A. oryzae RIB40 : AO090009000418, Aspergillus wentii : Aspwe1_0180879 and Aspergillus sydowii : Aspsy1_0156233		down	A-B	A-B				AA		AA
AN7989	Putative phosphatidylserine decarboxylase with a predicted role in phospholipid metabolism		down	A-B	A-B				A-B	A-B	AA
AN7992	Ortholog of A. niger CBS 513.88 : An02g10280, Aspergillus wentii : Aspwe1_0042861, Aspergillus sydowii : Aspsy1_0047959 and Aspergillus carbonarius ITEM 5010 : Acar5010_203951		down	A-B	A-B	AA			AA		AA
AN8018	Transcript induced by light in in developmentally competent mycelia		down	A-B	A-B				AA		A-B	A-B
AN8641	Transcript induced by light in in developmentally competent mycelia		down	A-B	A-B	AA			A-B	A-B	AA
AN8930	Has domain(s) with predicted DNA binding, DNA-binding transcription factor activity, RNA polymerase II-specific, zinc ion binding activity and role in regulation of transcription, DNA-templated, transcription, DNA-templated		down	A-B	A-B	AA			AA		AA
AN8975	Ortholog of Aspergillus versicolor : Aspve1_0045995 and Aspergillus sydowii : Aspsy1_0060497		down	A-B	A-B	AA			AA		AA
AN9163	Ortholog of A. fumigatus Af293 : Afu8g07190, A. niger CBS 513.88 : An14g07150, A. oryzae RIB40 : AO090138000059, Aspergillus wentii : Aspwe1_0078799 and Aspergillus sydowii : Aspsy1_0061494		down	A-B	A-B	AA			AA		AA
AN2538	Ortholog of Aspergillus versicolor : Aspve1_0026536 and Aspergillus sydowii : Aspsy1_0028980		down		BB
AN7798	Ortholog of A. nidulans FGSC A4 : AN6764, AN2660, A. fumigatus Af293 : Afu8g01960 and A. niger CBS 513.88 : An15g04120, An11g05430, An01g12050, An11g03480, An01g01140		down		BB				A-B	A-B	A-B	A-B
AN2951	Putative UDP-glucose 4-epimerase with a predicted role in galactose and galactitol metabolism		down			AA		down
AN9380	Putative chitin deacetylase; catalyzes the conversion of chitin to chitosan by the deacetylation of N-acetyl-D-glucosamine residues		down			AA
AN0230	Ortholog of Neosartorya fischeri NRRL 181 : NFIA_102580, Aspergillus wentii : Aspwe1_0182725, Aspergillus versicolor : Aspve1_0035599 and Aspergillus zonatus : Aspzo1_0019331		down			AA		up
AN0501	Ortholog(s) have role in fumiquinazoline C biosynthetic process		down			AA		down
AN0585	Has domain(s) with predicted DNA-binding transcription factor activity, RNA polymerase II-specific, zinc ion binding activity, role in regulation of transcription, DNA-templated and nucleus localization		down			AA
AN0798	Protein of unknown function		down			AA
AN0974	Small uORF encoded in the 5'UTR of the brlA beta transcript; plays a role in the translational repression of brlA beta		down			AA		up
AN10318	Predicted glycosylphosphatidylinositol (GPI)-anchored protein		down			AA			A-B	A-B
AN10391	Protein of unknown function		down			AA
AN11999	Ortholog of Aspergillus versicolor : Aspve1_0043679, Aspergillus clavatus NRRL 1 : ACLA_093220, Aspergillus zonatus : Aspzo1_0014878 and Aspergillus sydowii : Aspsy1_0046207		down			AA		down
AN12032	Ortholog of Aspergillus versicolor : Aspve1_0087631 and Aspergillus sydowii : Aspsy1_1136647		down			AA		up
AN12487	Protein of unknown function		down			AA		down
AN12492	Has domain(s) with predicted GTP binding, GTPase activity		down			AA
AN1338	Predicted glycosylphosphatidylinositol (GPI)-anchored protein		down			AA		down
AN1611	Has domain(s) with predicted FAD binding activity		down			AA		up
AN1622	Protein of unknown function		down			AA
AN1837	Putative hydrophobin; predicted glycosyl phosphatidylinositol (GPI)-anchor		down			AA		up
AN1941	Predicted glycosylphosphatidylinositol (GPI)-anchored protein		down			AA		down
AN2425	Ortholog of A. fumigatus Af293 : Afu2g13850, A. niger CBS 513.88 : An02g05260, A. oryzae RIB40 : AO090026000188, Aspergillus wentii : Aspwe1_0054675 and Aspergillus sydowii : Aspsy1_0075212		down			AA
AN2646	Ortholog of A. nidulans FGSC A4 : AN3519, AN0587, AN0866, AN7370 and A. fumigatus Af293 : Afu1g15200, Afu3g03790, Afu4g14040, Afu5g06900, Afu7g08575		down			AA		down
AN2647	Ortholog of A. fumigatus Af293 : Afu4g14050, Afu8g06260, A. niger CBS 513.88 : An02g00700, An02g06510, An05g01900, An05g01910, An09g02660 and A. oryzae RIB40 : AO090103000117		down			AA		down
AN2922	Ortholog of A. nidulans FGSC A4 : AN1515, AN7536, A. niger CBS 513.88 : An12g10030, A. oryzae RIB40 : AO090701000305, AO090102000038, AO090124000043 and Aspergillus wentii : Aspwe1_0030521		down			AA
AN2923	Ortholog of A. nidulans FGSC A4 : AN10601, A. fumigatus Af293 : Afu2g17770, Afu8g00650, A. niger CBS 513.88 : An11g02090, An01g01000 and A. oryzae RIB40 : AO090020000174, AO090103000301		down			AA		down
AN2941	Ortholog of A. nidulans FGSC A4 : AN5437, A. fumigatus Af293 : Afu3g08250, Afu6g13630, A. niger CBS 513.88 : An02g11860 and A. oryzae RIB40 : AO090005001453, AO090103000325		down			AA
AN2954	Ortholog of A. fumigatus Af293 : Afu3g07870, A. niger CBS 513.88 : An02g11390, A. oryzae RIB40 : AO090005001484, Aspergillus wentii : Aspwe1_0029219 and Aspergillus sydowii : Aspsy1_0042610		down			AA		down
AN3276	Putative Type II fatty acid synthase with a predicted role in mitochondrial fatty acid formation		down			AA
AN3280	Has domain(s) with predicted DNA-binding transcription factor activity, RNA polymerase II-specific, zinc ion binding activity, role in regulation of transcription, DNA-templated and nucleus localization		down			AA		down
AN3303	Ortholog of A. nidulans FGSC A4 : AN3346, AN3348, AN2044, AN8727 and A. fumigatus Af293 : Afu4g10080, Afu7g00420, Afu8g06100, Afu4g01242		down			AA		up
AN3304	Putative GABA transporter; transcript repressed by light in developmentally competent mycelia		down			AA		up
AN3379	Ortholog of A. fumigatus Af293 : Afu7g01170, A. niger CBS 513.88 : An01g01580, An12g01970, An01g00420, A. oryzae RIB40 : AO090010000104, AO090038000140 and Aspergillus wentii : Aspwe1_0112566		down			AA		down
AN3820	Protein of unknown function		down			AA
AN3961	Ortholog of Aspergillus versicolor : Aspve1_0054191		down			AA
AN4575	Ortholog of A. oryzae RIB40 : AO090011000461, Aspergillus flavus NRRL 3357 : AFL2T_05228, Aspergillus versicolor : Aspve1_0042983 and Aspergillus sydowii : Aspsy1_0091136		down			AA		down
AN4855	Ortholog of A. fumigatus Af293 : Afu3g07550, A. niger CBS 513.88 : An02g13140, A. oryzae RIB40 : AO090020000137, Aspergillus wentii : Aspwe1_0029251 and Aspergillus sydowii : Aspsy1_0087744		down			AA		down
AN4879	Protein of unknown function		down			AA		down	AB	AB
AN5046	Anisin-1; secreted defensin-like peptide with a predicted role in defense response; high homology to the mosquito defensin AaDefA1		down			AA		up
AN5312	Ortholog of A. nidulans FGSC A4 : AN6413, AN6419, AN6946, AN5664, AN8328, AN3241, AN10369, AN1930, AN2386, AN1738, AN11159, AN8984, AN8951, AN1540, AN8971, AN9387, AN9266, AN9306, AN1317, AN10886, AN7232, AN7774, AN12202		down			AA		up
AN5664	Ortholog of A. nidulans FGSC A4 : AN6413, AN6419, AN6946, AN5312, AN8328, AN3241, AN10369, AN1930, AN2386, AN1738, AN11159, AN8984, AN8951, AN1540, AN8971, AN9387, AN9266, AN9306, AN1317, AN10886, AN7232, AN7774, AN12202		down			AA
AN6401	Putative hydrophobin		down			AA
AN6470	Protein with lysozyme activity, involved in carbohydrate catabolism		down			AA		up
AN6620	Has domain(s) with predicted hydrolase activity, hydrolyzing O-glycosyl compounds activity and role in carbohydrate metabolic process		down			AA		down
AN6624	Ortholog of A. niger CBS 513.88 : An15g01640, A. oryzae RIB40 : AO090701000161, Aspergillus wentii : Aspwe1_0048634, Aspergillus versicolor : Aspve1_0086150 and Aspergillus zonatus : Aspzo1_0135880		down			AA
AN7280	Has domain(s) with predicted ATP binding activity		down			AA			A-B	A-B	A-B	A-B
AN8116	Ortholog of A. fumigatus Af293 : Afu5g02770, A. niger CBS 513.88 : An02g09830, A. oryzae RIB40 : AO090102000396, Aspergillus wentii : Aspwe1_0029998 and Aspergillus sydowii : Aspsy1_0050460		down			AA		up
AN8311	Ortholog of A. nidulans FGSC A4 : AN3529, AN4144, AN9211, AN4846 and A. fumigatus Af293 : Afu1g17260, Afu4g07950, Afu4g09380, Afu6g00560, Afu6g12140, Afu8g01900		down			AA
AN8326	Ortholog of Aspergillus flavus NRRL 3357 : AFL2T_09730, AFL2T_11380 and Aspergillus clavatus NRRL 1 : ACLA_060960		down			AA
AN8609	Predicted glycosylphosphatidylinositol (GPI)-anchored protein		down			AA
AN8624	Protein of unknown function		down			AA		down
AN8802	Ortholog of Aspergillus versicolor : Aspve1_0088238 and Aspergillus sydowii : Aspsy1_0035041		down			AA		up
AN8890	Has domain(s) with predicted carbohydrate binding, catalytic activity and role in carbohydrate catabolic process		down			AA
AN8972	Has domain(s) with predicted transmembrane transporter activity, role in transmembrane transport and integral component of membrane, membrane localization		down			AA
AN9001	Protein of unknown function		down			AA
AN2669	Has domain(s) with predicted role in response to stress and integral component of membrane localization		down			A/B	A/B
AN6075	Has domain(s) with predicted ammonia-lyase activity, role in L-phenylalanine catabolic process, biosynthetic process and cytoplasm localization		down			A/B	A/B	down
AN9373	Has domain(s) with predicted DNA-binding transcription factor activity, RNA polymerase II-specific, zinc ion binding activity, role in regulation of transcription, DNA-templated and nucleus localization		down			A-B	A-B
AN6487	Putative aspartyl protease; ortholog of S. cerevisiae BAR1; expression reduced after exposure to farnesol		down						AA		AA
AN1320	Has domain(s) with predicted serine-type peptidase activity and role in proteolysis		down						AA
AN10379	Has domain(s) with predicted glutathione transferase activity		down						AA
AN0441	Has domain(s) with predicted zinc ion binding activity		down						AA		AA
AN0775	Has domain(s) with predicted NAD binding, oxidoreductase activity, acting on the CH-OH group of donors, NAD or NADP as acceptor activity and role in oxidation-reduction process		down						AA		AA
AN0898	Has domain(s) with predicted carbon-sulfur lyase activity and role in metabolic process		down						AA		AA
AN0950	Ortholog of Aspergillus versicolor : Aspve1_0036555 and Aspergillus sydowii : Aspsy1_0038433		down						AA		AA
AN10025	Ortholog of A. fumigatus Af293 : Afu5g11280, A. niger CBS 513.88 : An01g02420, A. oryzae RIB40 : AO090026000715, Neosartorya fischeri NRRL 181 : NFIA_075990 and Aspergillus clavatus NRRL 1 : ACLA_014360		down						AA		AA
AN10260	Intracellular, menadione stress-induced protein		down						AA		AA
AN10288	Protein of unknown function		down						AA		A/B	A/B
AN10343	Ortholog(s) have sodium:inorganic phosphate symporter activity, sodium:phosphate symporter activity, role in phosphate ion transmembrane transport, phosphate ion transport, transmembrane transport and plasma membrane localization		down						AA		AA
AN10494	Has domain(s) with predicted oxidoreductase activity and role in metabolic process		down						AA		AA
AN11039	Has domain(s) with predicted carbon-sulfur lyase activity and role in metabolic process		down						AA		A-B	A-B
AN11151	Ortholog of A. oryzae RIB40 : AO090010000656, Aspergillus glaucus : Aspgl1_0164878, Aspergillus wentii : Aspwe1_0165833, Aspergillus versicolor : Aspve1_0047516 and Aspergillus zonatus : Aspzo1_0025875		down						AA
AN11492	Protein of unknown function		down					down	AA		AA
AN11984	Has domain(s) with predicted role in isoprenoid biosynthetic process		down						AA		AA
AN12022	Has domain(s) with predicted FAD binding, oxidoreductase activity and role in metabolic process		down						AA		AA
AN1278	Ortholog of A. oryzae RIB40 : AO090038000459		down						AA		AA
AN1509	Ortholog of A. fumigatus Af293 : Afu8g05120, A. niger CBS 513.88 : An16g07630, A. oryzae RIB40 : AO090005000631, Aspergillus wentii : Aspwe1_0044080 and Aspergillus sydowii : Aspsy1_0028718		down						AA		AA
AN1596	Putative short-chain dehydrogenase; member of the PbcR-activated diterpene cluster		down					down	AA		AA
AN1597	Protein of unknown function; member of the PbcR-activated diterpene cluster		down						AA		AA
AN1607	Has domain(s) with predicted transferase activity, transferring hexosyl groups activity and role in carbohydrate metabolic process, lipid glycosylation, metabolic process		down						AA		AA
AN1608	Ortholog of A. fumigatus Af293 : Afu4g09250, A. niger CBS 513.88 : An04g04280, A. oryzae RIB40 : AO090023000611 and Aspergillus wentii : Aspwe1_0025307, Aspwe1_0043468, Aspwe1_0045458		down						AA		AA
AN1714	Ortholog of A. nidulans FGSC A4 : AN1718, A. fumigatus Af293 : Afu4g08380, Afu4g08420, A. niger CBS 513.88 : An04g03190, An04g03210 and A. oryzae RIB40 : AO090023000718		down					down	AA		AA
AN1715	Putative mannose-6-phosphate isomerase with a predicted role in mannose/mannitol, fructose, and sorbose/sorbitol metabolism		down						AA		AA
AN1738	Ortholog of A. nidulans FGSC A4 : AN6413, AN6419, AN6946, AN5312, AN5664, AN8328, AN3241, AN10369, AN1930, AN2386, AN11159, AN8984, AN8951, AN1540, AN8971, AN9387, AN9266, AN9306, AN1317, AN10886, AN7232, AN7774, AN12202		down						AA
AN1754	Putative protein of unknown function; expression upregulated after exposure to farnesol		down						AA		AA
AN1808	Has domain(s) with predicted oxidoreductase activity and role in oxidation-reduction process		down						AA		AA
AN2555	Ortholog(s) have carboxypeptidase activity, serine-type carboxypeptidase activity		down					down	AA
AN2593	Has domain(s) with predicted FAD binding, oxidoreductase activity and role in metabolic process		down						AA
AN3161	Short-chain dehydrogenase/reductase family oxidoreductase; Protein expressed at decreased levels in a hapX mutant versus wild-type		down						AA		AA
AN3310	Predicted glycosylphosphatidylinositol (GPI)-anchored protein		down					down	AA
AN3330	Protein of unknown function		down						AA		AA
AN3605	Has domain(s) with predicted oxidoreductase activity and role in oxidation-reduction process		down						AA		AA
AN3776	Has domain(s) with predicted role in transmembrane transport and integral component of membrane localization		down						AA		A-B	A-B
AN4621	Has domain(s) with predicted transmembrane transporter activity, role in transmembrane transport and integral component of membrane, membrane localization		down						AA		AA
AN4812	Predicted glycosylphosphatidylinositol (GPI)-anchored protein		down						AA
AN4940	Ortholog(s) have role in reciprocal meiotic recombination and mitochondrion, nuclear envelope, plasma membrane localization		down						AA		AA
AN5087	Ortholog of Aspergillus tubingensis : Asptu1_0123225, Aspergillus brasiliensis : Aspbr1_0049601 and Aspergillus fumigatus A1163 : AFUB_080030		down						AA
AN5088	Putative potassium-transporting ATPase with a predicted role in energy metabolism		down						AA		AA
AN5400	Ortholog of A. nidulans FGSC A4 : AN9282, AN0025, AN7063, AN7804/stcW, AN8757, A. fumigatus Af293 : Afu6g03020, Afu6g13790 and A. niger CBS 513.88 : An08g09190, An03g06480, An11g08030, An13g01810, An12g07380		down						AA		AA
AN5401	Ortholog of A. fumigatus Af293 : Afu6g13860, A. niger CBS 513.88 : An08g08500, A. oryzae RIB40 : AO090103000362, Aspergillus sydowii : Aspsy1_0046494 and Aspergillus terreus NIH2624 : ATET_03448		down						AA		AA
AN5556	Has domain(s) with predicted oxidoreductase activity and role in metabolic process		down						AA		AA
AN5847	Ortholog of A. fumigatus Af293 : Afu2g08000, A. niger CBS 513.88 : An05g00550, Neosartorya fischeri NRRL 181 : NFIA_083670 and Aspergillus wentii : Aspwe1_0175059, Aspwe1_0670697		down						AA		AA
AN6169	Ortholog of A. fumigatus Af293 : Afu2g08290, A. niger CBS 513.88 : An05g00900, A. oryzae RIB40 : AO090011000875, Aspergillus wentii : Aspwe1_0674836 and Aspergillus sydowii : Aspsy1_0058068		down						AA		AA
AN6183	Putative F-box protein		down						AA
AN6963	Ortholog(s) have flavin-linked sulfhydryl oxidase activity and role in oxidation-reduction process		down						AA		AA
AN7507	Has domain(s) with predicted DNA binding, DNA-binding transcription factor activity, RNA polymerase II-specific, zinc ion binding activity and role in regulation of transcription, DNA-templated, transcription, DNA-templated		down					down	AA
AN7712	Has domain(s) with predicted hydrolase activity		down						AA
AN7776	Has domain(s) with predicted DNA-binding transcription factor activity, RNA polymerase II-specific, zinc ion binding activity, role in regulation of transcription, DNA-templated and nucleus localization		down						AA
AN7847	Has domain(s) with predicted role in cell wall macromolecule catabolic process		down						AA		AA
AN7970	Has domain(s) with predicted phosphoric diester hydrolase activity and role in lipid metabolic process		down						AA		AA
AN7990	Ortholog of A. niger CBS 513.88 : An11g06780, Aspergillus wentii : Aspwe1_0176973, Aspergillus sydowii : Aspsy1_0047960 and Aspergillus terreus NIH2624 : ATET_06661		down						AA		AA
AN8032	Putative C-3 sterol dehydrogenase; expression upregulated after exposure to farnesol		down						AA		AA
AN8646	Protein of unknown function		down					down	AA
AN9310	Transcript induced by light in in developmentally competent mycelia		down						AA		AA
AN9351	Ortholog of Aspergillus versicolor : Aspve1_0048024 and Aspergillus sydowii : Aspsy1_0163543		down						AA		AA
AN1072	Ortholog of Aspergillus versicolor : Aspve1_0285801 and Aspergillus sydowii : Aspsy1_0025703		down					down	A/B	A/B
AN3210	Has domain(s) with predicted transmembrane transporter activity, role in transmembrane transport and integral component of membrane, membrane localization		down						A/B	A/B	A/B	A/B
AN8483	Ortholog of A. niger CBS 513.88 : An13g02730, Neosartorya fischeri NRRL 181 : NFIA_001870, Aspergillus wentii : Aspwe1_0175506 and Aspergillus versicolor : Aspve1_0088786		down					down	A/B	A/B
AN9028	Ortholog of A. niger CBS 513.88 : An12g07320, A. oryzae RIB40 : AO090102000193, Neosartorya fischeri NRRL 181 : NFIA_043870 and Aspergillus wentii : Aspwe1_0436420, Aspwe1_0732323		down						A/B	A/B
AN10305	Has domain(s) with predicted proton transmembrane transporter activity and role in proton transmembrane transport		down					down	AB	AB
AN10371	Ortholog of A. fumigatus Af293 : Afu3g07945, A. oryzae RIB40 : AO090005001494, Neosartorya fischeri NRRL 181 : NFIA_069220, Aspergillus wentii : Aspwe1_0029211 and Aspergillus versicolor : Aspve1_0127963		down					down	AB	AB
AN3077	Has domain(s) with predicted catalytic activity and role in nucleoside metabolic process		down					down	AB	AB
AN3529	Ortholog of A. nidulans FGSC A4 : AN4144, AN8311, AN9211, AN4846 and A. fumigatus Af293 : Afu1g17260, Afu4g07950, Afu4g09380, Afu6g00560, Afu6g12140, Afu8g01900		down					down	AB	AB
AN3791	Ortholog of A. fumigatus Af293 : Afu2g03990, A. niger CBS 513.88 : An07g08650, A. oryzae RIB40 : AO090005001527, Aspergillus wentii : Aspwe1_0183621 and Aspergillus sydowii : Aspsy1_0150415		down					down	AB	AB
AN4115	Ortholog of Aspergillus versicolor : Aspve1_0037421, Aspergillus sydowii : Aspsy1_0060570 and Aspergillus aculeatus ATCC16872 : Aacu16872_055617		down						AB	AB
AN6972	Protein of unknown function		down						AB	AB	AB	AB
AN9311	Ortholog of A. nidulans FGSC A4 : AN9208, A. fumigatus Af293 : Afu5g14850, A. niger CBS 513.88 : An12g05170, An03g01320, An12g07240 and A. oryzae RIB40 : AO090023000071, AO090026000100		down					down	AB	AB
AN0033	Ortholog of A. nidulans FGSC A4 : AN10483, AN2809, AN2115, AN12460, A. fumigatus Af293 : Afu2g00940, Afu2g16560, Afu3g15340, Afu7g00460, Afu7g06360 and A. niger CBS 513.88 : An14g02830, An16g00830		down						A-B	A-B
AN0948	Has domain(s) with predicted ATP binding, ATPase activity, nucleoside-triphosphatase activity, nucleotide binding activity		down					down	A-B	A-B	AA
AN11337	Ortholog of A. niger CBS 513.88 : An18g01250, Aspergillus tubingensis : Asptu1_0114551, Aspergillus brasiliensis : Aspbr1_0322983 and Aspergillus kawachii : Aspka1_0173401		down						A-B	A-B	A-B	A-B
AN12149	Ortholog of Aspergillus glaucus : Aspgl1_0039633, Aspergillus wentii : Aspwe1_0187295, Aspergillus versicolor : Aspve1_0046062 and Aspergillus sydowii : Aspsy1_0048834		down					down	A-B	A-B
AN12195	Protein of unknown function		down						A-B	A-B	AA
AN2838	Ortholog of Aspergillus glaucus : Aspgl1_0163409, Neosartorya fischeri NRRL 181 : NFIA_097910, Aspergillus clavatus NRRL 1 : ACLA_058550 and Aspergillus zonatus : Aspzo1_0133076		down						A-B	A-B	A-B	A-B
AN3512	Ortholog of Aspergillus brasiliensis : Aspbr1_0049104, Aspergillus glaucus : Aspgl1_0060098, Aspergillus flavus NRRL 3357 : AFL2T_08754 and Neosartorya fischeri NRRL 181 : NFIA_073230		down						A-B	A-B	A-B	A-B
AN3524	Putative galactose 1-dehydrogenase with a predicted role in galactonic acid and galactonate metabolism		down						A-B	A-B
AN4177	Has domain(s) with predicted catalytic activity, coenzyme binding activity and role in cellular metabolic process		down						A-B	A-B	A-B	A-B
AN5207	Ortholog of A. fumigatus Af293 : Afu6g07400, A. niger CBS 513.88 : An09g01160, A. oryzae RIB40 : AO090005001560, Aspergillus wentii : Aspwe1_0111955 and Aspergillus sydowii : Aspsy1_1140414		down						A-B	A-B	AB	AB
AN5654	Protein of unknown function		down						A-B	A-B	A-B	A-B
AN6633	Protein of unknown function; transcript is induced by nitrate		down					down	A-B	A-B	A-B	A-B
AN7618	Has domain(s) with predicted channel activity, role in transmembrane transport and membrane localization		down						A-B	A-B	AA
AN9038	Has domain(s) with predicted role in Mo-molybdopterin cofactor biosynthetic process, molybdopterin cofactor biosynthetic process		down						A-B	A-B	AA
AN7148	Ortholog of A. nidulans FGSC A4 : AN11171, A. fumigatus Af293 : Afu4g03595, A. niger CBS 513.88 : An02g01320, An14g01685, An03g06340 and A. oryzae RIB40 : AO090026000213, AO090026000142, AO090023000130		down					down		BB
AN12449	Has domain(s) with predicted NAD(P)+ transhydrogenase (AB-specific) activity, NAD(P)+ transhydrogenase activity, NADP binding activity and role in oxidation-reduction process, proton transmembrane transport		down								AA
AN3482	Protein of unknown function		down								AA
AN3537	Has domain(s) with predicted O-methyltransferase activity		down								AA
AN9177	Has domain(s) with predicted FMN binding, catalytic activity, oxidoreductase activity and role in oxidation-reduction process		down								AA
AN4807	Ortholog of A. niger CBS 513.88 : An02g13800, A. oryzae RIB40 : AO090020000293, Aspergillus wentii : Aspwe1_0052428, Aspergillus sydowii : Aspsy1_0087808 and Aspergillus terreus NIH2624 : ATET_08721		down								AB	AB
AN1792	Has domain(s) with predicted hydrolase activity, hydrolase activity, acting on ester bonds activity and role in lipid metabolic process		down					up			A-B	A-B
AN5409	Has domain(s) with predicted catalytic activity, coenzyme binding activity and role in cellular metabolic process		up	AA					A-B	A-B	A-B	A-B
AN2652	Ortholog of A. nidulans FGSC A4 : AN6790, AN1599/pbcR, AN1028, AN9293, AN0680 and A. fumigatus Af293 : Afu3g02700, Afu8g00950, Afu1g03775		up	AA
AN3872	Transcript induced by light in in developmentally competent mycelia		up	AA				down	A-B	A-B	AA
AN6761	Putative acyl-coA dehydrogenase		up	AA
AN8441	Has domain(s) with predicted DNA binding, DNA-binding transcription factor activity, RNA polymerase II-specific, zinc ion binding activity and role in regulation of transcription, DNA-templated, transcription, DNA-templated		up	AA
AN8962	Has domain(s) with predicted solute:proton antiporter activity, role in cation transport, transmembrane transport and integral component of membrane localization		up	AA		AA			AA		AA
AN8988	Has domain(s) with predicted NAD binding, oxidoreductase activity, acting on the aldehyde or oxo group of donors, NAD or NADP as acceptor activity and role in cellular amino acid metabolic process, oxidation-reduction process		up	AA		AA			A-B	A-B	AA
AN9179	Ortholog(s) have extracellular region localization		up	AA					AA		AA
AN6796	Ortholog(s) have intracellular localization		up	AB	AB				A-B	A-B	AA
AN2653	Has domain(s) with predicted FAD binding, oxidoreductase activity and role in metabolic process		up		BB
AN11028	Predicted nucleotide binding protein with oxidoreductase activity and a role in oxidation-reduction; predicted secondary metabolism gene cluster member		up			AA
AN4122	Ortholog of A. nidulans FGSC A4 : AN2881, AN10123, AN0867, A. fumigatus Af293 : Afu1g13860, Afu1g15180, Afu3g11650 and A. niger CBS 513.88 : An08g07010, An02g07440, An01g13480		up			AA
AN5540	Has domain(s) with predicted role in transmembrane transport and integral component of membrane localization		up			AA
AN6273	Ortholog(s) have intracellular localization		up			AA		down
AN6869	Has domain(s) with predicted hydrolase activity, acting on carbon-nitrogen (but not peptide) bonds, in linear amidines, metal ion binding activity		up			AA			AA		AA
AN6870	Has domain(s) with predicted antiporter activity, xenobiotic transmembrane transporter activity, role in drug transmembrane transport and membrane localization		up			AA
AN6871	Has domain(s) with predicted role in transmembrane transport and integral component of membrane localization		up			AA
AN7876	Putative branched chain amino acid aminotransferase with a predicted role in branched chain amino acid biosynthesis; predicted secondary metabolism gene cluster member		up			AA
AN7880	Putative fatty-acyl-CoA synthase with a predicted role in cytosolic fatty acid formation; predicted secondary metabolism gene cluster member		up			AA
AN7884	Putative nonribosomal peptide synthase (NRPS) similar to ferrichrome peptide synthetases involved in siderophore biosynthesis; predicted backbone enzyme of a secondary metabolism gene cluster member		up			AA		up
AN8449	Has domain(s) with predicted electron transfer activity, heme binding, metal ion binding, molybdenum ion binding, oxidoreductase activity and role in nitrate assimilation, oxidation-reduction process		up			AA			A-B	A-B	A-B	A-B
AN8653	Has domain(s) with predicted amidase activity, carbon-nitrogen ligase activity, with glutamine as amido-N-donor activity		up			AA
AN8990	Ortholog of A. fumigatus Af293 : Afu8g00840, A. oryzae RIB40 : AO090023000465, Neosartorya fischeri NRRL 181 : NFIA_094290 and Aspergillus wentii : Aspwe1_0046447, Aspwe1_0100493		up			AA			A-B	A-B	AA
AN0402	Ortholog of Aspergillus versicolor : Aspve1_0048646 and Aspergillus sydowii : Aspsy1_0055229		up				BB	down	AA
AN0169	Protein of unknown function		up						AA
AN0174	Ortholog(s) have D-amino-acid oxidase activity and role in D-alanine metabolic process, D-amino acid metabolic process, D-valine metabolic process		up					down	AA		AA
AN0483	Ortholog of Neosartorya fischeri NRRL 181 : NFIA_058180, Aspergillus versicolor : Aspve1_0158177, Aspergillus clavatus NRRL 1 : ACLA_085420 and Aspergillus zonatus : Aspzo1_0018005		up					down	AA		AA
AN10040	Ortholog of A. fumigatus Af293 : Afu5g09180, A. niger CBS 513.88 : An07g03930, A. oryzae RIB40 : AO090020000514, Aspergillus wentii : Aspwe1_0035291 and Aspergillus terreus NIH2624 : ATET_06551		up						AA		AA
AN10369	Ortholog of A. nidulans FGSC A4 : AN6413, AN6419, AN6946, AN5312, AN5664, AN8328, AN3241, AN1930, AN2386, AN1738, AN11159, AN8984, AN8951, AN1540, AN8971, AN9387, AN9266, AN9306, AN1317, AN10886, AN7232, AN7774, AN12202		up						AA		AA
AN10630	Has domain(s) with predicted integral component of membrane localization		up						AA		AA
AN10748	Protein of unknown function		up					down	AA
AN10915	Ortholog of A. niger CBS 513.88 : An04g09630, An03g01920, Aspergillus wentii : Aspwe1_0160312, Aspwe1_0167997, Aspergillus versicolor : Aspve1_0513563 and Aspergillus niger ATCC 1015 : 195107-mRNA, 45712-mRNA		up						AA		AA
AN11120	Has domain(s) with predicted role in transmembrane transport and integral component of membrane localization		up						AA		AA
AN11160	Ortholog of A. niger CBS 513.88 : An09g02040, A. oryzae RIB40 : AO090003001445, Aspergillus niger ATCC 1015 : 43435-mRNA and Aspergillus tubingensis : Asptu1_0136910		up						AA
AN11376	Possible pseudogene		up						AA		AA
AN11633	Protein of unknown function		up						AA
AN11725	Protein of unknown function		up						AA
AN11846	Protein of unknown function		up						AA		AA
AN11879	Protein of unknown function		up						AA		AA
AN12047	Ortholog of Aspergillus versicolor : Aspve1_0137144		up						AA		AA
AN12457	Ortholog(s) have phosphatidylcholine flippase activity, phosphatidylethanolamine flippase activity, phosphatidylserine flippase activity		up					down	AA		AA
AN1314	Ortholog of A. niger CBS 513.88 : An11g08070, An09g03760, Neosartorya fischeri NRRL 181 : NFIA_030520, Aspergillus versicolor : Aspve1_0031176 and Aspergillus niger ATCC 1015 : 39297-mRNA, 43311-mRNA		up						AA		AA
AN1557	Protein of unknown function		up						AA		AA
AN1614	Has domain(s) with predicted methyltransferase activity and role in metabolic process		up						AA		AA
AN1616	Ortholog of A. nidulans FGSC A4 : AN5887, AN4831, A. fumigatus Af293 : Afu2g11250, A. niger CBS 513.88 : An08g09700 and A. oryzae RIB40 : AO090026000525, AO090005000474, AO090113000193		up						AA		AA
AN1631	Ortholog(s) have L-methionine secondary active transmembrane transporter activity, role in methionine import across plasma membrane, sulfur amino acid transport and plasma membrane localization		up						AA		AA
AN1734	Ortholog of A. fumigatus Af293 : Afu6g08740, A. niger CBS 513.88 : An11g06130, A. oryzae RIB40 : AO090001000548, Aspergillus wentii : Aspwe1_0120879 and Aspergillus sydowii : Aspsy1_0289054		up						AA		AA
AN1882	Ortholog(s) have role in cell redox homeostasis and intracellular localization		up						AA		AA
AN2393	Has domain(s) with predicted oxidoreductase activity and role in metabolic process		up						AA		AA
AN2411	Ortholog of A. fumigatus Af293 : Afu2g13660, A. niger CBS 513.88 : An02g05520, A. oryzae RIB40 : AO090026000242, Aspergillus wentii : Aspwe1_0045469 and Aspergillus sydowii : Aspsy1_0341196		up						AA		AA
AN2471	Ortholog of A. niger CBS 513.88 : An02g07790, Neosartorya fischeri NRRL 181 : NFIA_065240, Aspergillus clavatus NRRL 1 : ACLA_039940, ACLA_078340 and Aspergillus niger ATCC 1015 : 144091-mRNA		up						AA		AA
AN2558	Ortholog of A. fumigatus Af293 : Afu3g15050, A. niger CBS 513.88 : An14g03430, A. oryzae RIB40 : AO090701000428, Aspergillus wentii : Aspwe1_0175480 and Aspergillus sydowii : Aspsy1_0055978		up						AA		AA
AN2694	Has domain(s) with predicted oxidoreductase activity and role in metabolic process		up						AA		AA
AN2729	Has domain(s) with predicted role in transmembrane transport and integral component of membrane localization		up						AA		AA
AN2799	Has domain(s) with predicted oxidoreductase activity and role in metabolic process		up						AA
AN2844	Ortholog of A. fumigatus Af293 : Afu3g12255, A. niger CBS 513.88 : An02g08130, A. oryzae RIB40 : AO090003000790, Neosartorya fischeri NRRL 181 : NFIA_065040 and Aspergillus versicolor : Aspve1_0080524		up						AA		AA
AN3009	Has domain(s) with predicted catalytic activity		up					down	AA
AN3041	Has domain(s) with predicted role in transmembrane transport and integral component of membrane localization		up					down	AA
AN3358	Protein with endo-beta-(1,4)-mannanase activity, involved in degradation of mannans		up						AA		AA
AN3479	Ortholog of A. nidulans FGSC A4 : AN8495, AN3143, A. fumigatus Af293 : Afu3g01440, Afu3g13940, Afu4g03340, Afu5g07620 and A. niger CBS 513.88 : An13g02880, An09g04780		up						AA
AN3663	Ortholog(s) have glycine transmembrane transporter activity, role in glycine import into mitochondrion, heme biosynthetic process and mitochondrion localization		up						AA		AA
AN3681	Ortholog(s) have role in cellular iron ion homeostasis and fungal-type vacuole membrane localization		up						AA
AN3780	Putative alpha-L-rhamnosidase		up						AA		AA
AN3783	Protein of unknown function		up						AA		AA
AN3873	Putative zinc-binding oxidoreductase; expression upregulated after exposure to farnesol; palA-dependent expression independent of pH		up						AA		AA
AN4328	Ortholog(s) have role in positive regulation of (R)-carnitine transmembrane transport, positive regulation of polyamine transmembrane transport		up						AA
AN5019	Has domain(s) with predicted 5-methyltetrahydropteroyltriglutamate-homocysteine S-methyltransferase activity, zinc ion binding activity and role in methionine biosynthetic process		up						AA
AN5089	Ortholog of A. oryzae RIB40 : AO090103000089, Aspergillus flavus NRRL 3357 : AFL2T_12280, Aspergillus terreus NIH2624 : ATET_03032 and Aspergillus aculeatus ATCC16872 : Aacu16872_034601		up						AA		AA
AN5354	Has domain(s) with predicted oxidoreductase activity, transferase activity, transferring acyl groups other than amino-acyl groups activity and role in oxidation-reduction process		up						AA		AA
AN5355	Has domain(s) with predicted oxidoreductase activity, transferase activity, transferring acyl groups other than amino-acyl groups, zinc ion binding activity and role in oxidation-reduction process		up					down	AA		AA
AN5435	Has domain(s) with predicted oxidoreductase activity, oxidoreductase activity, acting on the aldehyde or oxo group of donors, NAD or NADP as acceptor activity and role in oxidation-reduction process		up						AA		AA
AN5513	Ortholog of A. fumigatus Af293 : Afu6g13090, A. niger CBS 513.88 : An08g10380, A. oryzae RIB40 : AO090003000434, Aspergillus wentii : Aspwe1_0033610 and Aspergillus sydowii : Aspsy1_0175593		up					down	AA		AA
AN5841	Ortholog of A. nidulans FGSC A4 : AN8634, A. fumigatus Af293 : Afu8g07320, Aspergillus wentii : Aspwe1_0062778, Aspergillus sydowii : Aspsy1_0048400 and Aspergillus terreus NIH2624 : ATET_08649		up						AA
AN5878	Has domain(s) with predicted catalytic activity, transferase activity, transferring acyl groups other than amino-acyl groups activity and role in metabolic process		up					down	AA
AN6421	Ortholog(s) have cyanamide hydratase activity and role in cyanamide metabolic process		up					down	AA
AN6460	Ortholog of A. nidulans FGSC A4 : AN12398, A. oryzae RIB40 : AO090023000067, AO090010000683, Aspergillus wentii : Aspwe1_0075588 and Aspergillus versicolor : Aspve1_0086685		up						AA		AA
AN6581	Has domain(s) with predicted ATP binding, ATPase activity, ATPase-coupled transmembrane transporter activity, nucleoside-triphosphatase activity, nucleotide binding activity and role in transmembrane transport		up						AA		AA
AN6672	Ortholog of A. fumigatus Af293 : Afu4g00380, A. niger CBS 513.88 : An02g13650, Neosartorya fischeri NRRL 181 : NFIA_045260, Aspergillus wentii : Aspwe1_0119957 and Aspergillus versicolor : Aspve1_0052258		up						AA		AA
AN6751	Has domain(s) with predicted hydrolase activity, hydrolyzing O-glycosyl compounds activity and role in carbohydrate metabolic process		up					down	AA
AN6791	Putative polyketide synthase		up						AA		AA
AN7373	Has domain(s) with predicted transmembrane transporter activity, role in transmembrane transport, transport and membrane localization		up						AA
AN7452	Protein of unknown function		up					down	AA
AN7466	Has domain(s) with predicted role in transmembrane transport and integral component of membrane localization		up						AA		AA
AN7488	Has domain(s) with predicted hydrolase activity, acting on carbon-nitrogen (but not peptide) bonds, in linear amidines, metal ion binding activity		up						AA
AN7600	Ortholog(s) have role in hydrogen sulfide biosynthetic process, sulfate assimilation, sulfur amino acid biosynthetic process		up						AA		AA
AN7607	Ortholog of A. fumigatus Af293 : Afu2g15480, A. niger CBS 513.88 : An15g05550, An12g07620, A. oryzae RIB40 : AO090012000281, AO090020000707 and Aspergillus wentii : Aspwe1_0025841, Aspwe1_0037842, Aspwe1_0044672		up						AA		AA
AN7919	Has domain(s) with predicted DNA binding, DNA-binding transcription factor activity, RNA polymerase II-specific, zinc ion binding activity and role in regulation of transcription, DNA-templated, transcription, DNA-templated		up					down	AA
AN7920	Has domain(s) with predicted hydrolase activity, acting on carbon-nitrogen (but not peptide) bonds activity and role in nitrogen compound metabolic process		up					down	AA
AN8026	Ortholog of A. nidulans FGSC A4 : AN1101, AN0010, A. fumigatus Af293 : Afu3g00120, Afu5g09120 and A. niger CBS 513.88 : An12g05610, An07g03970		up					up	AA		A-B	A-B
AN8083	Has domain(s) with predicted role in transmembrane transport and integral component of membrane localization		up						AA
AN8340	Has domain(s) with predicted role in transmembrane transport and integral component of membrane localization		up						AA
AN8341	Has domain(s) with predicted catalytic activity, sulfuric ester hydrolase activity and role in metabolic process		up						AA		AA
AN8593	Ortholog of A. fumigatus Af293 : Afu3g02790, Afu4g00460, A. niger CBS 513.88 : An11g01410, A. oryzae RIB40 : AO090009000455, AO090138000169 and Neosartorya fischeri NRRL 181 : NFIA_045160		up						AA		AA
AN8607	Ortholog of A. nidulans FGSC A4 : AN1754, A. fumigatus Af293 : Afu3g02050, A. niger CBS 513.88 : An11g06690, An18g01930 and A. oryzae RIB40 : AO090001000144		up						AA		AA
AN8648	Has domain(s) with predicted RNA binding, RNA-DNA hybrid ribonuclease activity, RNA-directed DNA polymerase activity, nucleic acid binding activity and role in RNA-dependent DNA biosynthetic process		up					down	AA
AN8665	Protein of unknown function		up						AA
AN8776	Ortholog of A. niger CBS 513.88 : An08g03560, A. oryzae RIB40 : AO090038000281, Aspergillus wentii : Aspwe1_0508022, Aspergillus sydowii : Aspsy1_0035009 and Aspergillus terreus NIH2624 : ATET_00334		up						AA		AA
AN9131	Has domain(s) with predicted catalytic activity		up						AA		AA
AN9203	Ortholog of A. fumigatus Af293 : Afu4g03470, Afu7g06720, A. niger CBS 513.88 : An10g00950, An04g04430, An02g00350, An08g09800 and A. oryzae RIB40 : AO090103000074, AO090023000047		up					up	AA		AA
AN9242	Protein of unknown function; transcript is induced by nitrate		up						AA		AA
AN9366	Ortholog(s) have intracellular localization		up						AA		AA
AN9483	Ortholog of A. nidulans FGSC A4 : AN6861/phbB, A. fumigatus Af293 : Afu3g00670, Afu5g13060, Afu8g01120 and A. niger CBS 513.88 : An03g01130, An07g06330, An07g00905		up						AA		AA
AN11094	Putative zinc-binding oxidoreductase; intracellular, menadione stress-induced protein; expression upregulated after exposure to farnesol		up						A/B	A/B	A-B	A-B
AN11212	Has domain(s) with predicted DNA binding, nucleic acid binding, zinc ion binding activity, role in transcription, DNA-templated and nucleus localization		up						A/B	A/B
AN1641	Ortholog(s) have role in sporocarp development involved in sexual reproduction		up						A/B	A/B	AA
AN2784	Ortholog of A. nidulans FGSC A4 : AN9281, AN1020, AN2199, A. fumigatus Af293 : Afu1g12970, A. niger CBS 513.88 : An15g05320 and A. oryzae RIB40 : AO090012000596, AO090038000022		up						A/B	A/B
AN3203	Putative F-box protein		up						A/B	A/B
AN4608	Ortholog of A. nidulans FGSC A4 : AN9531, AN1600, AN9354 and A. fumigatus Af293 : Afu4g03520, Afu5g14130, Afu7g06920		up						A/B	A/B
AN5449	Has domain(s) with predicted catalytic activity, sulfuric ester hydrolase activity and role in metabolic process		up						A/B	A/B	AA
AN6747	Has domain(s) with predicted DNA binding, DNA-binding transcription factor activity, RNA polymerase II-specific, zinc ion binding activity and role in regulation of transcription, DNA-templated, transcription, DNA-templated		up					down	A/B	A/B
AN7199	Has domain(s) with predicted oxidoreductase activity, transferase activity, transferring acyl groups other than amino-acyl groups, zinc ion binding activity and role in oxidation-reduction process		up						A/B	A/B
AN7215	Protein of unknown function		up						A/B	A/B
AN7613	Putative chitinase; glycoside hydrolase family 18 (GH18) protein with a predicted role in chitin hydrolysis		up						A/B	A/B
AN8356	Has domain(s) with predicted oxidoreductase activity, transferase activity, transferring acyl groups other than amino-acyl groups, zinc ion binding activity and role in oxidation-reduction process		up						A/B	A/B
AN8471	Ortholog of A. nidulans FGSC A4 : AN7227, A. niger CBS 513.88 : An11g03790, Aspergillus wentii : Aspwe1_0113279 and Aspergillus versicolor : Aspve1_0088776, Aspve1_0123469		up						A/B	A/B
AN8958	Ortholog of A. niger CBS 513.88 : An12g09520, Neosartorya fischeri NRRL 181 : NFIA_093480, Aspergillus versicolor : Aspve1_0047500 and Aspergillus clavatus NRRL 1 : ACLA_030210		up						A/B	A/B	AA
AN8966	Has domain(s) with predicted neurotransmitter:sodium symporter activity, role in neurotransmitter transport and integral component of membrane localization		up						A/B	A/B
AN3377	Ortholog(s) have endopeptidase activity, role in proteolysis, zymogen activation and extracellular region localization		up						AB	AB
AN0771	Putative ABC multidrug transporter; confers resistance to azole antifungal drugs		up					down	AB	AB
AN10401	Ortholog of A. nidulans FGSC A4 : AN6780, A. fumigatus Af293 : Afu7g01210, Aspergillus sydowii : Aspsy1_0029236, Aspsy1_0043488 and Aspergillus terreus NIH2624 : ATET_08673		up						AB	AB	AB	AB
AN3475	Protein of unknown function		up						AB	AB
AN3600	Ortholog of A. fumigatus Af293 : Afu4g12760, A. niger CBS 513.88 : An01g08280, A. oryzae RIB40 : AO090009000304, Aspergillus wentii : Aspwe1_0099611 and Aspergillus sydowii : Aspsy1_0032683		up						AB	AB
AN7295	Putative transmembrane transporter; upregulated in A. oryzae and A. nidulans under hypoxic growth conditions		up						AB	AB
AN8943	Ortholog of A. fumigatus Af293 : Afu2g00900, Afu6g11560, A. niger CBS 513.88 : An01g11690, An03g01300, A. oryzae RIB40 : AO090113000175, AO090023000422 and Aspergillus wentii : Aspwe1_0024673, Aspwe1_0108934		up					down	AB	AB
AN9282	Has domain(s) with predicted role in oxidation-reduction process		up					down	AB	AB
AN0020	Ortholog of A. fumigatus Af293 : Afu2g00190, A. niger CBS 513.88 : An15g07480, Aspergillus versicolor : Aspve1_0365574, Aspergillus niger ATCC 1015 : 40853-mRNA and Aspergillus zonatus : Aspzo1_0077270		up						A-B	A-B	A-B	A-B
AN0283	Protein of unknown function		up					down	A-B	A-B
AN0390	Ortholog of A. fumigatus Af293 : Afu2g15450, A. niger CBS 513.88 : An07g02450, Neosartorya fischeri NRRL 181 : NFIA_090690, Aspergillus wentii : Aspwe1_0669328 and Aspergillus versicolor : Aspve1_0122514		up						A-B	A-B	AA
AN0518	Ortholog of A. nidulans FGSC A4 : AN6482, A. fumigatus Af293 : Afu1g15540, A. niger CBS 513.88 : An12g09790, A. oryzae RIB40 : AO090011000265 and Neosartorya fischeri NRRL 181 : NFIA_009780		up						A-B	A-B	AA
AN10332	Has domain(s) with predicted role in transmembrane transport and integral component of membrane localization		up					down	A-B	A-B	A-B	A-B
AN10683	Ortholog(s) have nucleoside:proton symporter activity and role in nucleoside transport		up					down	A-B	A-B	A-B	A-B
AN10761	Predicted PIN domain-containing RNA-binding protein; expression upregulated after exposure to farnesol		up					down	A-B	A-B
AN10995	Protein of unknown function		up						A-B	A-B
AN11105	Has domain(s) with predicted oxidoreductase activity and role in metabolic process		up						A-B	A-B	AA
AN11276	Protein of unknown function		up					down	A-B	A-B
AN11907	Protein of unknown function		up					down	A-B	A-B	AA
AN12116	Has domain(s) with predicted role in transmembrane transport and integral component of membrane localization		up						A-B	A-B	AA
AN12189	Protein of unknown function		up						A-B	A-B	AA
AN2472	Has domain(s) with predicted catalytic activity		up						A-B	A-B	A-B	A-B
AN2570	Ortholog of Aspergillus versicolor : Aspve1_0039071 and Aspergillus sydowii : Aspsy1_0146617		up					down	A-B	A-B	AA
AN2639	Has domain(s) with predicted hydrolase activity		up						A-B	A-B	AA
AN2720	Has domain(s) with predicted catalytic activity		up						A-B	A-B	A-B	A-B
AN2728	Has domain(s) with predicted catalytic activity, lyase activity and role in metabolic process		up						A-B	A-B	AA
AN3433	Has domain(s) with predicted DNA-binding transcription factor activity, RNA polymerase II-specific, zinc ion binding activity, role in regulation of transcription, DNA-templated and nucleus localization		up						A-B	A-B	A-B	A-B
AN3573	Has domain(s) with predicted oxidoreductase activity, oxidoreductase activity, acting on the aldehyde or oxo group of donors, NAD or NADP as acceptor activity and role in oxidation-reduction process		up					down	A-B	A-B
AN3970	Kinesin-family protein		up					down	A-B	A-B
AN4711	Has domain(s) with predicted hydrolase activity		up					down	A-B	A-B	AA
AN5018	Protein of unknown function		up						A-B	A-B
AN5081	Protein of unknown function		up					down	A-B	A-B	AA
AN5768	Ortholog(s) have role in actin cytoskeleton organization, inositol lipid-mediated signaling, negative regulation of phospholipid translocation, vacuole organization and plasma membrane localization		up						A-B	A-B	AA
AN5943	Ortholog of A. nidulans FGSC A4 : AN6924, AN8512, AN8548, AN0857, AN8661, AN4642 and A. fumigatus Af293 : Afu1g15290, Afu3g00850, Afu4g08850, Afu7g00920		up					down	A-B	A-B
AN6437	Ortholog of Aspergillus versicolor : Aspve1_0052718 and Aspergillus sydowii : Aspsy1_0031878		up						A-B	A-B	AA
AN6834	Has domain(s) with predicted transmembrane transporter activity, role in transmembrane transport and integral component of membrane, membrane localization		up					down	A-B	A-B
AN7011	Ortholog of A. fumigatus Af293 : Afu4g04318, A. niger CBS 513.88 : An14g00530, Aspergillus wentii : Aspwe1_0053203, Aspergillus sydowii : Aspsy1_0184132 and Aspergillus terreus NIH2624 : ATET_02726		up						A-B	A-B	AA
AN7640	Ortholog of A. nidulans FGSC A4 : AN5292, A. fumigatus Af293 : Afu5g12490, Afu5g13780, A. niger CBS 513.88 : An14g06730 and A. oryzae RIB40 : AO090120000374, AO090020000661		up						A-B	A-B	AA
AN7907	Putative glyoxylate-bleomycin resistance protein; member of the F9775 secondary metabolite gene cluster		up						A-B	A-B	A-B	A-B
AN8357	Has domain(s) with predicted DNA binding, DNA-binding transcription factor activity, RNA polymerase II-specific, nucleic acid binding, zinc ion binding activity		up						A-B	A-B	AA
AN8359	Has domain(s) with predicted oxidoreductase activity and role in oxidation-reduction process		up						A-B	A-B	AA
AN8652	Protein of unknown function		up					down	A-B	A-B	AA
AN8912	Ortholog(s) have role in myo-inositol import across plasma membrane		up						A-B	A-B
AN9036	Protein of unknown function		up						A-B	A-B	AA
AN9130	Has domain(s) with predicted cholinesterase activity		up						A-B	A-B	AA
AN9189	Protein of unknown function		up						A-B	A-B	AA
AN9370	Has domain(s) with predicted role in transmembrane transport and integral component of membrane localization		up					down	A-B	A-B	A-B	A-B
AN0732	Putative transporter of the major facilitator superfamily (MFS); expression upregulated after exposure to farnesol		up							BB
AN1799	Ortholog(s) have lipase activity, role in lipid catabolic process and extracellular region localization		up							BB
AN1952	Ortholog of A. fumigatus Af293 : Afu4g13380, A. niger CBS 513.88 : An01g09090, Aspergillus wentii : Aspwe1_0022581, Aspergillus sydowii : Aspsy1_0142528 and Aspergillus terreus NIH2624 : ATET_03221		up					down		BB
AN2099	Putative alternative oxidase		up					down		BB
AN2571	Protein of unknown function		up					down		BB
AN10321	Has domain(s) with predicted role in transmembrane transport and integral component of membrane localization		up								AA
AN11321	Protein of unknown function		up								AA
AN12277	Has domain(s) with predicted iron ion binding, oxidoreductase activity and role in fatty acid biosynthetic process, oxidation-reduction process		up								AA
AN3357	Has domain(s) with predicted transmembrane transporter activity, role in transmembrane transport and integral component of membrane, membrane localization		up								AA
AN4106	Ortholog(s) have sulfate transmembrane transporter activity, sulfur compound transmembrane transporter activity and role in sulfate transport, sulfite transport, sulfur compound transport		up								AA
AN7634	Has domain(s) with predicted catalytic activity, sulfuric ester hydrolase activity and role in metabolic process		up								AA
AN11081	Has domain(s) with predicted 3-beta-hydroxy-delta5-steroid dehydrogenase activity and role in oxidation-reduction process, steroid biosynthetic process			AA				down
AN0493	PalA-dependent expression independent of pH			AA
AN10233	Has domain(s) with predicted NADP binding, coenzyme binding, oxidoreductase activity, acting on the CH-OH group of donors, NAD or NADP as acceptor, phosphogluconate dehydrogenase (decarboxylating) activity			AA					AA		AA
AN10250	Putative protein of unknown function; expression upregulated after exposure to farnesol			AA		AA			AA		AA
AN11095	Has domain(s) with predicted methyltransferase activity			AA					AA		AA
AN11159	Has domain(s) with predicted phosphatidylserine decarboxylase activity and role in phospholipid biosynthetic process			AA		AA			AA		AA
AN11456	Protein of unknown function			AA		AA		down	A-B	A-B	AA
AN11461	Possible pseudogene			AA					AA		AA
AN11477	Ortholog of Aspergillus sydowii : Aspsy1_0137382 and Aspergillus aculeatus ATCC16872 : Aacu16872_040719			AA		AA			A-B	A-B	A-B	A-B
AN1184	Has domain(s) with predicted hydrolase activity			AA
AN11931	Protein of unknown function			AA		AA		down	AB	AB
AN12291	Ortholog of A. nidulans FGSC A4 : AN8528, A. fumigatus Af293 : Afu5g09790, A. niger CBS 513.88 : An15g05030, A. oryzae RIB40 : AO090010000330 and Aspergillus wentii : Aspwe1_0054537, Aspwe1_0170434			AA				down
AN1312	Has domain(s) with predicted oxidoreductase activity, transferase activity, transferring acyl groups other than amino-acyl groups, zinc ion binding activity and role in oxidation-reduction process			AA				down
AN1356	Ortholog of A. fumigatus Af293 : Afu1g09300, A. niger CBS 513.88 : An08g00850, A. oryzae RIB40 : AO090005001593, Aspergillus wentii : Aspwe1_0127273 and Aspergillus sydowii : Aspsy1_0025389			AA		AA		down	AA		AA
AN1654	Ortholog of A. fumigatus Af293 : Afu4g08750, A. niger CBS 513.88 : An04g03610, Aspergillus wentii : Aspwe1_0034423 and Aspergillus sydowii : Aspsy1_0084030			AA					AA		AA
AN2025	Putative transcription factor; predicted role in secondary metabolite production			AA				down	A-B	A-B
AN2199	Possible pseudogene			AA					A-B	A-B	AA
AN2792	Ortholog of A. fumigatus Af293 : Afu8g02480, A. niger CBS 513.88 : An12g05730, Neosartorya fischeri NRRL 181 : NFIA_096170 and Aspergillus versicolor : Aspve1_0038333			AA		AA		down	A-B	A-B	AA
AN2835	Has domain(s) with predicted D-arabinono-1,4-lactone oxidase activity, FAD binding, UDP-N-acetylmuramate dehydrogenase activity, flavin adenine dinucleotide binding, oxidoreductase activity, acting on CH-OH group of donors activity			AA		AA			A-B	A-B	AA
AN2977	Putative transporter with a predicted role in small molecule transport; putative mitochondrial phosphate carrier protein; expression upregulated after exposure to farnesol			AA					AA		AA
AN3143	Ortholog of A. nidulans FGSC A4 : AN3479, AN8495, A. fumigatus Af293 : Afu3g01440, Afu3g13940, Afu4g03340, Afu5g07620 and A. niger CBS 513.88 : An13g02880, An09g04780			AA					AA		AA
AN3525	Protein of unknown function			AA				down
AN3877	Ortholog of A. fumigatus Af293 : Afu8g01510, A. niger CBS 513.88 : An09g00650, A. oryzae RIB40 : AO090020000665, Aspergillus sydowii : Aspsy1_0044348 and Aspergillus terreus NIH2624 : ATET_03801			AA
AN4474	Ortholog of A. niger CBS 513.88 : An04g02110, A. oryzae RIB40 : AO090023000799, Neosartorya fischeri NRRL 181 : NFIA_108450 and Aspergillus versicolor : Aspve1_0133959			AA				down	AA
AN4636	Ortholog(s) have role in ascospore wall assembly and ascospore wall, prospore membrane localization			AA		AA			AA		AA
AN5083	Has domain(s) with predicted proton transmembrane transporter activity, role in proton transmembrane transport and proton-transporting V-type ATPase, V0 domain, vacuolar proton-transporting V-type ATPase, V0 domain localization			AA					AA		AA
AN5259	Has domain(s) with predicted DNA-binding transcription factor activity, RNA polymerase II-specific, zinc ion binding activity, role in regulation of transcription, DNA-templated and nucleus localization			AA					AA		AA
AN5338	Has domain(s) with predicted oxidoreductase activity and role in oxidation-reduction process			AA		AA			AA		AA
AN5461	Ortholog of A. fumigatus Af293 : Afu5g00130, A. niger CBS 513.88 : An01g00570, Aspergillus wentii : Aspwe1_0022994, Aspergillus versicolor : Aspve1_0039792 and Aspergillus clavatus NRRL 1 : ACLA_024300			AA				down
AN5550	Has domain(s) with predicted UDP-N-acetylmuramate dehydrogenase activity, flavin adenine dinucleotide binding activity and role in oxidation-reduction process			AA		AA			A-B	A-B
AN5938	Ortholog of A. fumigatus Af293 : Afu5g01380, A. niger CBS 513.88 : An16g00850, A. oryzae RIB40 : AO090701000476, Aspergillus wentii : Aspwe1_0588663 and Aspergillus sydowii : Aspsy1_0085137			AA		AA			AA		AA
AN5942	Ortholog of Aspergillus versicolor : Aspve1_0148858 and Aspergillus sydowii : Aspsy1_0029071			AA
AN5987	Ortholog of Aspergillus versicolor : Aspve1_0061699 and Aspergillus sydowii : Aspsy1_0057891			AA
AN6455	Predicted glycosylphosphatidylinositol (GPI)-anchored protein			AA		AA			AA		AA
AN6468	Has domain(s) with predicted metal ion transmembrane transporter activity, role in metal ion transport, transmembrane transport and membrane localization			AA		AA		down	AA		AA
AN6704	Protein of unknown function			AA		AA			AA		AA
AN6812	Has domain(s) with predicted hydrolase activity, acting on carbon-nitrogen (but not peptide) bonds activity and role in nitrogen compound metabolic process			AA
AN7018	Ortholog of Neosartorya fischeri NRRL 181 : NFIA_029090, Aspergillus wentii : Aspwe1_0115404, Aspergillus versicolor : Aspve1_0339168 and Aspergillus clavatus NRRL 1 : ACLA_054100			AA		AA			AA		AA
AN7139	Ortholog of A. fumigatus Af293 : Afu4g03730, A. niger CBS 513.88 : An14g01430, A. oryzae RIB40 : AO090011000309, Aspergillus wentii : Aspwe1_0030342 and Aspergillus sydowii : Aspsy1_0034590			AA		AA		down	A-B	A-B	AA
AN7211	Putative C-8,7 sterol isomerase with a predicted role in ergosterol biosynthesis			AA
AN7267	Has domain(s) with predicted flavin adenine dinucleotide binding, oxidoreductase activity, acting on CH-OH group of donors activity and role in oxidation-reduction process			AA				down
AN7378	Ortholog of A. niger CBS 513.88 : An15g07560, A. oryzae RIB40 : AO090103000092, Neosartorya fischeri NRRL 181 : NFIA_102090 and Aspergillus versicolor : Aspve1_0187655			AA
AN7893	Has domain(s) with predicted 2-oxoglutarate-dependent dioxygenase activity and role in oxidation-reduction process			AA
AN7904	Has domain(s) with predicted methyltransferase activity and role in metabolic process			AA					AA		AA
AN7946	Has domain(s) with predicted catalytic activity, ferric iron binding, iron ion binding, oxidoreductase activity, acting on single donors with incorporation of molecular oxygen, incorporation of two atoms of oxygen activity			AA					AA		AA
AN7961	Ortholog of A. fumigatus Af293 : Afu4g13760, A. oryzae RIB40 : AO090010000492, Neosartorya fischeri NRRL 181 : NFIA_102620 and Aspergillus versicolor : Aspve1_0045462			AA
AN8058	Has domain(s) with predicted electron transfer activity, metal ion binding, molybdenum ion binding, oxidoreductase activity and role in nitrate assimilation, oxidation-reduction process			AA		AA			AA		AA
AN8077	Has domain(s) with predicted role in transmembrane transport and integral component of membrane localization			AA		AA		down	AA		AA
AN8308	Ortholog of A. oryzae RIB40 : AO090001000393, Aspergillus flavus NRRL 3357 : AFL2T_09046 and Aspergillus wentii : Aspwe1_0166216			AA				down
AN8621	Has domain(s) with predicted role in transmembrane transport and integral component of membrane localization			AA		AA			AA		AA
AN8917	Has domain(s) with predicted carbon-sulfur lyase activity and role in metabolic process			AA
AN8955	Has domain(s) with predicted role in transmembrane transport and integral component of membrane localization			AA
AN8959	Ortholog(s) have role in lipid droplet disassembly			AA		AA			AA		AA
AN8961	Protein of unknown function			AA		AA			AA		AA
AN8964	Has domain(s) with predicted flavin adenine dinucleotide binding activity			AA
AN9005	Putative polyketide synthase (PKS); predicted backbone enzyme of a secondary metabolism gene cluster			AA		AA			AB	AB	AB	AB
AN9174	Has domain(s) with predicted role in transmembrane transport and membrane localization			AA				up
AN9184	Ortholog(s) have plasma membrane localization			AA		AA			AA
AN9185	Protein of unknown function; transcript is induced by nitrate			AA
AN9284	Ortholog of Aspergillus tubingensis : Asptu1_0059406, Aspergillus versicolor : Aspve1_0129968 and Aspergillus sydowii : Aspsy1_0068838			AA					AA		AA
AN9369	Has domain(s) with predicted catalytic activity			AA					AA		AA
AN9377	Ortholog of A. fumigatus Af293 : Afu3g02940, A. niger CBS 513.88 : An01g00550, A. oryzae RIB40 : AO090120000006, Aspergillus wentii : Aspwe1_0112345 and Aspergillus sydowii : Aspsy1_0163833			AA				down	AA
AN10505	Putative unsaturated rhamnogalacturonan hydrolase			A/B	A/B
AN10815	Has domain(s) with predicted oxidoreductase activity and role in metabolic process			A/B	A/B
AN11093	Has domain(s) with predicted DNA binding, DNA-binding transcription factor activity, DNA-binding transcription factor activity, RNA polymerase II-specific, zinc ion binding activity			A/B	A/B				AA		AA
AN2657	Protein of unknown function			A/B	A/B				AA
AN2924	Putative nonribosomal peptide synthetase (NRPS)-like enzyme			A/B	A/B
AN5984	Has domain(s) with predicted oxidoreductase activity and role in oxidation-reduction process			A/B	A/B
AN6478	Protein of unknown function			A/B	A/B
AN7115	Has domain(s) with predicted role in guanosine tetraphosphate metabolic process			A/B	A/B
AN7868	Ortholog of A. nidulans FGSC A4 : AN1866, A. fumigatus Af293 : Afu2g04540, A. niger CBS 513.88 : An04g07800, A. oryzae RIB40 : AO090003000256 and Neosartorya fischeri NRRL 181 : NFIA_057620, NFIA_081290			A/B	A/B
AN7943	Has domain(s) with predicted hydrolase activity and role in metabolic process			A/B	A/B				AA		AA
AN8147	Ortholog of A. nidulans FGSC A4 : AN1625, A. fumigatus Af293 : Afu3g01080, Afu3g12760, A. niger CBS 513.88 : An02g08740 and A. oryzae RIB40 : AO090012000846, AO090023000643			A/B	A/B
AN8400	Sugar transporter; transcriptionally induced by growth on xylose			A/B	A/B
AN1020	Ortholog of A. nidulans FGSC A4 : AN2784, AN9281, AN2199, A. fumigatus Af293 : Afu1g12970, A. niger CBS 513.88 : An15g05320 and A. oryzae RIB40 : AO090012000596, AO090038000022			AB	AB				A-B	A-B	AA
AN10333	Has domain(s) with predicted hydrolase activity and role in metabolic process			AB	AB	AB	AB	down
AN11495	Protein of unknown function			AB	AB				AA		AA
AN6441	Protein of unknown function			AB	AB			down	A-B	A-B	AA
AN8591	Has domain(s) with predicted calcium ion binding activity			AB	AB			down	AA		AA
AN9032	Ortholog of A. nidulans FGSC A4 : AN10883, A. fumigatus Af293 : Afu7g06950, Afu8g02470, A. niger CBS 513.88 : An03g06330, An03g00350, An05g02580 and A. oryzae RIB40 : AO090010000660			AB	AB				A-B	A-B	A-B	A-B
AN0694	Ortholog(s) have intracellular localization			A-B	A-B				AA		AA
AN10699	Has domain(s) with predicted catalytic activity and role in metabolic process			A-B	A-B	AA			A-B	A-B	AA
AN10977	Ortholog(s) have extracellular region localization			A-B	A-B	AA		down	A-B	A-B	AA
AN12085	Ortholog of Aspergillus versicolor : Aspve1_0150796 and Aspergillus sydowii : Aspsy1_0090491			A-B	A-B	AA		down	A-B	A-B	AA
AN1269	Ortholog of A. fumigatus Af293 : Afu1g09980, Afu8g01400, A. niger CBS 513.88 : An08g01800, A. oryzae RIB40 : AO090038000434, AO090011000869 and Aspergillus wentii : Aspwe1_0048977			A-B	A-B	AA			AA		AA
AN2822	Has domain(s) with predicted channel activity, transporter activity, role in transmembrane transport, transport and membrane localization			A-B	A-B	AA			A-B	A-B	A-B	A-B
AN3976	Ortholog of A. fumigatus Af293 : Afu2g05290, A. niger CBS 513.88 : An02g11140, Neosartorya fischeri NRRL 181 : NFIA_082050, Aspergillus wentii : Aspwe1_0592927 and Aspergillus versicolor : Aspve1_0080485			A-B	A-B	A/B	A/B		AA		AA
AN5339	Ortholog of A. oryzae RIB40 : AO090103000416, Aspergillus wentii : Aspwe1_0022264, Aspergillus sydowii : Aspsy1_0050291 and Aspergillus terreus NIH2624 : ATET_00936			A-B	A-B	AA		down	A-B	A-B	AA
AN0600	Ortholog of A. fumigatus Af293 : Afu6g10940, A. niger CBS 513.88 : An06g01260, A. oryzae RIB40 : AO090023000524, Aspergillus wentii : Aspwe1_0107964 and Aspergillus sydowii : Aspsy1_0041257					AA			AA		AA
AN11069	Ortholog of A. fumigatus Af293 : Afu5g03860, A. niger CBS 513.88 : An09g06330, Neosartorya fischeri NRRL 181 : NFIA_038250 and Aspergillus wentii : Aspwe1_0115239					AA			AA		AA
AN11880	Protein of unknown function					AA			AB	AB
AN1330	Predicted glycosylphosphatidylinositol (GPI)-anchored protein					AA			AA		AA
AN1567	Ortholog of A. fumigatus Af293 : Afu5g00910, Neosartorya fischeri NRRL 181 : NFIA_041260, Aspergillus wentii : Aspwe1_0149298 and Aspergillus versicolor : Aspve1_0045271, Aspve1_0151961					AA
AN2020	Has domain(s) with predicted DNA binding, DNA-binding transcription factor activity, sequence-specific DNA binding activity and role in regulation of transcription, DNA-templated					AA
AN2287	Ortholog of A. fumigatus Af293 : Afu5g06230, A. niger CBS 513.88 : An17g01540, A. oryzae RIB40 : AO090009000635, Aspergillus wentii : Aspwe1_0101971 and Aspergillus sydowii : Aspsy1_0039639					AA
AN2392	Has domain(s) with predicted protein dimerization activity					AA
AN2578	Has domain(s) with predicted peroxidase activity					AA
AN2659	Predicted glycosylphosphatidylinositol (GPI)-anchored protein					AA
AN2685	Ortholog of Aspergillus wentii : Aspwe1_0039128, Aspergillus versicolor : Aspve1_0134218, Aspergillus clavatus NRRL 1 : ACLA_017060 and Aspergillus niger ATCC 1015 : 184563-mRNA					AA		down
AN2836	Ortholog of A. niger CBS 513.88 : An03g01740, An16g00290, Neosartorya fischeri NRRL 181 : NFIA_004380 and Aspergillus wentii : Aspwe1_0170556					AA			A-B	A-B	AA
AN3042	Ortholog of A. fumigatus Af293 : Afu7g00320, A. niger CBS 513.88 : An13g02670, A. oryzae RIB40 : AO090005001314 and Neosartorya fischeri NRRL 181 : NFIA_112860					AA
AN3181	Protein kinase domain-containing protein; transcript is induced by nitrate; predicted NirA binding site in promoter					AA
AN3341	Ortholog(s) have role in chromate transport					AA
AN4482	Has domain(s) with predicted transmembrane transporter activity, role in transmembrane transport and integral component of membrane localization					AA			AA		AA
AN4650	Ortholog of A. fumigatus Af293 : Afu2g01790, A. niger CBS 513.88 : An07g05410, A. oryzae RIB40 : AO090011000436, Aspergillus wentii : Aspwe1_0112486 and Aspergillus sydowii : Aspsy1_0059416					AA
AN5035	Has domain(s) with predicted solute:proton antiporter activity, role in cation transport, transmembrane transport and integral component of membrane localization					AA
AN5090	Predicted ADP ribosylation factor (Arf) GTPase					AA		down	AA		AA
AN5315	Ortholog of A. nidulans FGSC A4 : AN7859, A. niger CBS 513.88 : An01g01450, A. oryzae RIB40 : AO090001000269, Neosartorya fischeri NRRL 181 : NFIA_044920 and Aspergillus wentii : Aspwe1_0166871					AA
AN5410	Predicted glycosylphosphatidylinositol (GPI)-anchored protein					AA
AN5968	Ortholog of A. fumigatus Af293 : Afu2g10560, A. niger CBS 513.88 : An02g05920, A. oryzae RIB40 : AO090011000581, Aspergillus sydowii : Aspsy1_0031261 and Aspergillus terreus NIH2624 : ATET_01516					AA		up
AN6099	Protein of unknown function					AA
AN6286	Has domain(s) with predicted mannosyl-oligosaccharide glucosidase activity and role in oligosaccharide metabolic process					AA			AA		AA
AN6960	Has domain(s) with predicted metal ion transmembrane transporter activity, role in metal ion transport, transmembrane transport and membrane localization					AA
AN7126	Ortholog of A. nidulans FGSC A4 : AN9262, A. fumigatus Af293 : Afu3g03140, Neosartorya fischeri NRRL 181 : NFIA_006010 and Aspergillus versicolor : Aspve1_0136655					AA
AN7390	Has domain(s) with predicted role in transmembrane transport and integral component of membrane localization					AA			AA		AA
AN7391	Ortholog of A. niger CBS 513.88 : An01g00210, A. oryzae RIB40 : AO090124000067, Aspergillus versicolor : Aspve1_0133217, Aspergillus niger ATCC 1015 : 46876-mRNA and Aspergillus sydowii : Aspsy1_1048564					AA			AA		AA
AN7641	Putative copper amine oxidase					AA
AN8544	Ortholog of Aspergillus versicolor : Aspve1_0033877 and Aspergillus sydowii : Aspsy1_0466900					AA		up
AN8627	Has domain(s) with predicted transferase activity, transferring glycosyl groups activity and membrane localization					AA			AA		AA
AN8774	Transcript induced in response to calcium dichloride in a CrzA-dependent manner					AA			AA		AA
AN9129	Ortholog(s) have role in pathogenesis					AA		up
AN9320	Ortholog of Aspergillus flavus NRRL 3357 : AFL2T_11783, Aspergillus wentii : Aspwe1_0104603, Aspergillus versicolor : Aspve1_0047986 and Aspergillus sydowii : Aspsy1_0051540					A-B	A-B
AN1577	Has domain(s) with predicted transmembrane transporter activity, role in transmembrane transport and integral component of membrane, membrane localization							down	AA		AA
AN1760	Ortholog(s) have role in autophagy, macroautophagy								AA
AN4832	Ortholog of A. fumigatus Af293 : Afu3g07240, A. niger CBS 513.88 : An02g13480/atg29, A. oryzae RIB40 : AO090020000200, Aspergillus wentii : Aspwe1_0042020 and Aspergillus sydowii : Aspsy1_0148063								AA		AB	AB
AN6360	Has domain(s) with predicted role in autophagy								AA
AN7591	Ortholog of A. nidulans FGSC A4 : AN7437, A. fumigatus Af293 : Afu2g06170, Afu2g15370, A. niger CBS 513.88 : An09g03630, An02g14810/atg22 and A. oryzae RIB40 : AO090012000289, AO090001000734								AA		AA
AN4215	Ortholog(s) have disulfide oxidoreductase activity, glutathione disulfide oxidoreductase activity, glutathione peroxidase activity, glutathione transferase activity								AA		AA
AN7567	Ortholog(s) have 2 iron, 2 sulfur cluster binding, RNA polymerase II activating transcription factor binding, disulfide oxidoreductase activity, glutathione disulfide oxidoreductase activity, iron-sulfur cluster binding activity								AA
AN3973	Putative peroxiredoxin								AA		AA
AN0758	Ortholog(s) have role in cellular response to iron ion starvation, siderophore biosynthetic process and cytoplasm localization								AA		A-B	A-B
AN0447	Has domain(s) with predicted iron ion binding, iron-sulfur cluster binding activity and role in iron-sulfur cluster assembly								AA		AA
AN10012	Ortholog(s) have role in protein maturation by [2Fe-2S] cluster transfer, protein maturation by [4Fe-4S] cluster transfer and mitochondrial matrix, mitochondrion localization								AA		AA
AN10237	Has domain(s) with predicted iron-sulfur cluster binding, structural molecule activity and role in iron-sulfur cluster assembly, protein maturation by iron-sulfur cluster transfer								AA		AA
AN1986	Ortholog(s) have ferrous iron binding, ferroxidase activity, iron chaperone activity and role in cellular iron ion homeostasis, cellular response to oxidative stress, glutathione metabolic process, iron-sulfur cluster assembly								AA		AA
AN2508	Ortholog(s) have cysteine desulfurase activity								AA		AA
AN4655	Ortholog(s) have 2 iron, 2 sulfur cluster binding, ATPase activator activity, ferrous iron binding, iron ion binding, iron-sulfur cluster binding, iron-sulfur cluster carrier activity, zinc ion binding activity								AA		AA
AN5953	Ortholog(s) have iron ion binding activity and role in biotin biosynthetic process, iron-sulfur cluster assembly, protein maturation by [4Fe-4S] cluster transfer, protein maturation by iron-sulfur cluster transfer								AA
AN3747	Ortholog(s) have Rab geranylgeranyltransferase activity and role in endoplasmic reticulum to Golgi vesicle-mediated transport, protein geranylgeranylation, protein targeting to membrane								AA		AA
AN7588	Putative ribulose-phosphate 3-epimerase with a predicted role in the pentose-phosphate shunt								AA		AA
AN0285	Putative 6-phosphogluconolactonase with a predicted role in gluconic acid and gluconate metabolism; expression upregulated after exposure to farnesol								AA		AA
AN3954	Putative phosphogluconate dehydrogenase (decarboxylating) with a predicted role in the pentose-phosphate shunt								AA		AA
AN8792	Has domain(s) with predicted catalytic activity and role in carbohydrate metabolic process								AA		AA
AN5718	Putative fumarate hydratase								AA		AA
AN9053	Putative malate dehydrogenase							down	AA		AA
AN0018	Possible pseudogene								AA		AA
AN0061	Ortholog of S. cerevisiae : YLR326W, A. fumigatus Af293 : Afu5g12410, A. oryzae RIB40 : AO090120000361, Aspergillus wentii : Aspwe1_0026696 and Aspergillus sydowii : Aspsy1_0103462								AA		AA
AN0117	Ortholog(s) have role in cellular response to oxidative stress								AA		AA
AN0128	Ortholog(s) have tRNA methyltransferase activity and role in tRNA methylation, wybutosine biosynthetic process							down	AA
AN0168	Ortholog of A. fumigatus Af293 : Afu5g11330, A. niger CBS 513.88 : An01g02510, A. oryzae RIB40 : AO090026000707, Aspergillus wentii : Aspwe1_0075145 and Aspergillus sydowii : Aspsy1_0027709								AA		AA
AN0178	Protein of unknown function								AA		AA
AN0183	Putative molybdopterin binding domain protein								AA		AA
AN0201	Has domain(s) with predicted role in transmembrane transport and integral component of membrane localization							down	AA
AN0212	Ortholog(s) have extracellular region localization								AA		AA
AN0246	Ortholog of A. fumigatus Af293 : Afu1g05300, A. niger CBS 513.88 : An01g04570, A. oryzae RIB40 : AO090003000826, Aspergillus wentii : Aspwe1_0049630 and Aspergillus sydowii : Aspsy1_0142918								AA
AN0293	Ortholog(s) have carboxylic ester hydrolase activity, structural constituent of ribosome activity, role in C-terminal protein demethylation and mitochondrial small ribosomal subunit localization								AA
AN0303	Ortholog(s) have mitochondrial outer membrane localization								AA
AN0319	Ortholog of A. fumigatus Af293 : Afu1g02490, A. niger CBS 513.88 : An01g05680, A. oryzae RIB40 : AO090005000843, Aspergillus wentii : Aspwe1_0049702 and Aspergillus sydowii : Aspsy1_0144752								AA		AA
AN0325	Ortholog(s) have intracellular, mitochondrion localization								AA		AA
AN0326	Ortholog of A. fumigatus Af293 : Afu1g02400, A. niger CBS 513.88 : An01g05790, A. oryzae RIB40 : AO090005000857, Aspergillus wentii : Aspwe1_0025630 and Aspergillus terreus NIH2624 : ATET_04850								AA		AA
AN0329	Ortholog(s) have SUMO binding, polyubiquitin modification-dependent protein binding, ubiquitin binding activity								AA
AN0336	Ortholog of A. fumigatus Af293 : Afu1g02310, A. niger CBS 513.88 : An01g05880, Aspergillus wentii : Aspwe1_0736723, Aspergillus sydowii : Aspsy1_1167337 and Aspergillus terreus NIH2624 : ATET_04862								AA		AA
AN0353	Putative F-box protein								AA		AA
AN0362	Ortholog of A. fumigatus Af293 : Afu6g00430, Afu6g03560, A. niger CBS 513.88 : An10g01040, An01g06280, A. oryzae RIB40 : AO090005000897 and Aspergillus wentii : Aspwe1_0035953, Aspwe1_0058160								AA
AN0391	Ortholog of A. nidulans FGSC A4 : AN7222, A. fumigatus Af293 : Afu1g01490, Afu2g01760, A. niger CBS 513.88 : An03g06670, An15g07300 and A. oryzae RIB40 : AO090010000045/aoiD, AO090102000259								AA		AA
AN0396	Has domain(s) with predicted protein dimerization activity								AA		AA
AN0397	Protein of unknown function							down	AA		AA
AN0408	Ortholog(s) have triglyceride lipase activity, role in cellular detoxification, triglyceride mobilization and lipid droplet localization								AA
AN0413	Protein of unknown function								AA
AN0436	Has domain(s) with predicted zinc ion binding activity								AA
AN0445	Ortholog(s) have RNA binding, structural constituent of ribosome activity, role in cytoplasmic translation, macroautophagy and cytosolic large ribosomal subunit localization								AA
AN0460	Putative F-box protein								AA		AB	AB
AN0532	Predicted DDE1 transposon-related ORF								AA		AA
AN0571	Ortholog(s) have cell septum, fungal-type vacuole, late endosome, plasma membrane localization								AA
AN0573	Has domain(s) with predicted intracellular localization								AA		AA
AN0599	Has domain(s) with predicted oxidoreductase activity, zinc ion binding activity and role in oxidation-reduction process								AA		A-B	A-B
AN0604	Ortholog(s) have role in nucleotide-excision repair, pyrimidine dimer repair by nucleotide-excision repair, response to UV								AA		AA
AN0610	Ortholog of A. nidulans FGSC A4 : AN8597, A. fumigatus Af293 : Afu1g17140, A. niger CBS 513.88 : An01g09590, A. oryzae RIB40 : AO090010000592 and Aspergillus wentii : Aspwe1_0068178								AA
AN0635	Ortholog(s) have intracellular localization								AA		AA
AN0691	Ortholog of A. fumigatus Af293 : Afu1g13530, A. niger CBS 513.88 : An08g06600, A. oryzae RIB40 : AO090012000522, Neosartorya fischeri NRRL 181 : NFIA_011970 and Aspergillus wentii : Aspwe1_0027806								AA		AA
AN0768	Ortholog of A. fumigatus Af293 : Afu1g14300, A. oryzae RIB40 : AO090011000381, Neosartorya fischeri NRRL 181 : NFIA_011110 and Aspergillus versicolor : Aspve1_0067752								AA		AA
AN0817	Ortholog(s) have DNA-binding transcription factor activity, RNA polymerase II-specific activity								AA
AN0819	Ortholog(s) have endoplasmic reticulum, plasma membrane localization								AA
AN0831	Ortholog of A. fumigatus Af293 : Afu1g14910, A. niger CBS 513.88 : An01g13030, A. oryzae RIB40 : AO090005001241, Aspergillus wentii : Aspwe1_0171775 and Aspergillus sydowii : Aspsy1_0139300								AA		AA
AN0832	Has domain(s) with predicted aminopeptidase activity, manganese ion binding activity and role in cellular process								AA
AN0856	Putative amino acid transporter; expression reduced after exposure to farnesol								AA
AN0870	Putative transporter with a predicted role in small molecule transport								AA		AA
AN0889	Ortholog(s) have ribosome binding activity, role in cytoplasmic translation and extrinsic component of membrane, mitochondrial inner membrane localization								AA
AN0916	Ortholog of Aspergillus glaucus : Aspgl1_0142420 and Aspergillus versicolor : Aspve1_0078861							down	AA
AN0930	Has domain(s) with predicted role in transmembrane transport and integral component of membrane localization								AA		AA
AN0952	Has domain(s) with predicted acid phosphatase activity								AA		AA
AN0998	Ortholog(s) have role in interspecies interaction between organisms								AA
AN1001	Ortholog of A. fumigatus Af293 : Afu1g12770, A. niger CBS 513.88 : An08g05540, A. oryzae RIB40 : AO090012000633, Aspergillus wentii : Aspwe1_0027882 and Aspergillus sydowii : Aspsy1_0191418								AA		AA
AN10013	Has domain(s) with predicted role in transmembrane transport and integral component of membrane localization								AA		AA
AN10034	Ortholog(s) have nuclear import signal receptor activity, role in inositol metabolic process, protein import into nucleus and nuclear envelope localization								AA		AA
AN10039	Putative histidine acid phosphatase								AA		AA
AN10056	Has domain(s) with predicted membrane localization								AA		AA
AN10073	Putative F-box protein								AA		AA
AN10098	Putative zinc-binding oxidoreductase; intracellular, menadione stress-induced protein							down	AA
AN10110	Has domain(s) with predicted racemase activity, acting on amino acids and derivatives activity and role in nitrogen compound metabolic process								AA
AN10146	Has domain(s) with predicted arylformamidase activity and role in tryptophan catabolic process to kynurenine								AA		AA
AN10149	Ortholog of A. fumigatus Af293 : Afu1g11510, A. niger CBS 513.88 : An08g03630, A. oryzae RIB40 : AO090038000273, Neosartorya fischeri NRRL 181 : NFIA_014060 and Aspergillus wentii : Aspwe1_0028047								AA		AA
AN10174	Ortholog of A. fumigatus Af293 : Afu1g10090, A. oryzae RIB40 : AO090038000427, Neosartorya fischeri NRRL 181 : NFIA_015560 and Aspergillus wentii : Aspwe1_0168735								AA		AA
AN10196	Ortholog of A. fumigatus Af293 : Afu8g04830, A. niger CBS 513.88 : An16g07980, A. oryzae RIB40 : AO090005000663, Neosartorya fischeri NRRL 181 : NFIA_097650 and Aspergillus wentii : Aspwe1_0645289								AA		AA
AN10209	Ortholog of A. oryzae RIB40 : AO090005000644, Neosartorya fischeri NRRL 181 : NFIA_097790, Aspergillus kawachii : Aspka1_0179507 and Aspergillus clavatus NRRL 1 : ACLA_058380								AA
AN10214	Has domain(s) with predicted catalytic activity, magnesium ion binding, thiamine pyrophosphate binding activity								AA		AA
AN1022	Ortholog(s) have role in potassium ion transport, proton transmembrane transport and integral component of mitochondrial inner membrane localization								AA		AA
AN10222	Ortholog(s) have glucose-6-phosphate 1-epimerase activity and fungal biofilm matrix localization								AA		AA
AN10251	Ortholog(s) have nuclear localization sequence binding, ubiquitin binding activity and role in response to ethanol								AA		AA
AN10264	Ortholog of A. oryzae RIB40 : AO090003000305, Aspergillus wentii : Aspwe1_0046218, Aspergillus versicolor : Aspve1_0080260 and Aspergillus clavatus NRRL 1 : ACLA_089630								AA		AA
AN1027	Ortholog of A. fumigatus Af293 : Afu1g12660, A. niger CBS 513.88 : An08g05410, A. oryzae RIB40 : AO090012000716, Aspergillus wentii : Aspwe1_0040406 and Aspergillus sydowii : Aspsy1_0038316								AA		AA
AN10272	Ortholog of A. fumigatus Af293 : Afu2g15690, Aspergillus wentii : Aspwe1_0170945, Aspergillus clavatus NRRL 1 : ACLA_074640 and Aspergillus zonatus : Aspzo1_0138260								AA
AN10283	Has domain(s) with predicted FMN binding, iron ion binding, oxidoreductase activity and role in oxidation-reduction process								AA		AA
AN10287	Has domain(s) with predicted FAD binding, oleate hydratase activity and role in fatty acid metabolic process								AA		AA
AN10289	Putative dimethyl-allyl-tryptophan synthase (DMATS)-type aromatic prenyltransferase; transcript is induced by nitrate							down	AA
AN10292	Ortholog of A. fumigatus Af293 : Afu5g10455, A. niger CBS 513.88 : An14g04320, A. oryzae RIB40 : AO090010000491, Aspergillus wentii : Aspwe1_0038732 and Aspergillus sydowii : Aspsy1_0054224								AA		AA
AN10293	Ortholog of A. fumigatus Af293 : Afu5g09950, Aspergillus glaucus : Aspgl1_0181943, Aspergillus flavus NRRL 3357 : AFL2T_11694 and Neosartorya fischeri NRRL 181 : NFIA_077320								AA		A-B	A-B
AN10294	Has domain(s) with predicted DNA-binding transcription factor activity, RNA polymerase II-specific, zinc ion binding activity, role in regulation of transcription, DNA-templated and nucleus localization								AA		AA
AN10300	Has domain(s) with predicted DNA-binding transcription factor activity, RNA polymerase II-specific, zinc ion binding activity, role in regulation of transcription, DNA-templated and nucleus localization							down	AA
AN10303	Ortholog of A. fumigatus Af293 : Afu2g13870, A. niger CBS 513.88 : An02g05230, A. oryzae RIB40 : AO090026000190, Neosartorya fischeri NRRL 181 : NFIA_089040 and Aspergillus wentii : Aspwe1_0032169								AA		AA
AN10348	Ortholog(s) have 3'-5'-exoribonuclease activity								AA
AN10358	Has domain(s) with predicted oxidoreductase activity, zinc ion binding activity and role in oxidation-reduction process								AA
AN10370	Has domain(s) with predicted oxidoreductase activity								AA
AN1040	Ortholog of A. oryzae RIB40 : AO090038000523, Aspergillus flavus NRRL 3357 : AFL2T_07855 and Aspergillus sydowii : Aspsy1_0160459, Aspsy1_0165518								AA		AA
AN10472	Has domain(s) with predicted catalytic activity, hydroxyethylthiazole kinase activity, thiamine-phosphate diphosphorylase activity and role in thiamine biosynthetic process								AA
AN10486	Putative nonribosomal peptide synthetase (NRPS)-like enzyme								AA
AN10499	Ortholog(s) have intracellular localization								AA		AA
AN10506	Ortholog of A. fumigatus Af293 : Afu5g14780, A. niger CBS 513.88 : An18g01640, A. oryzae RIB40 : AO090103000417, Aspergillus versicolor : Aspve1_0173600 and Aspergillus niger ATCC 1015 : 42671-mRNA							down	AA
AN10510	Ortholog of A. fumigatus Af293 : Afu4g13140, A. niger CBS 513.88 : An01g08830, A. oryzae RIB40 : AO090009000267, Aspergillus wentii : Aspwe1_0100948 and Aspergillus sydowii : Aspsy1_0059125								AA		AA
AN10511	Ortholog(s) have role in phospholipid biosynthetic process, phospholipid metabolic process, postreplication repair and endoplasmic reticulum localization								AA
AN10520	Putative alpha/beta hydrolase								AA		AA
AN10537	Has domain(s) with predicted RNA binding, nucleic acid binding, nucleotide binding activity								AA		AA
AN10539	Ortholog of S. cerevisiae : EFM6, A. fumigatus Af293 : Afu4g05890, A. niger CBS 513.88 : An04g00080, A. oryzae RIB40 : AO090672000009 and Aspergillus wentii : Aspwe1_0167304								AA		AA
AN10548	Has domain(s) with predicted DNA binding, DNA-binding transcription factor activity, RNA polymerase II-specific, zinc ion binding activity and role in regulation of transcription, DNA-templated, transcription, DNA-templated								AA		AA
AN10557	Putative ATP-dependent RNA helicase; protein levels decrease in response to farnesol								AA		AA
AN10559	Has domain(s) with predicted oxidoreductase activity, acting on the CH-CH group of donors activity, role in lipid metabolic process and cytoplasm, integral component of membrane localization								AA		AA
AN10569	Ortholog of A. fumigatus Af293 : Afu2g03100, A. niger CBS 513.88 : An07g07510, A. oryzae RIB40 : AO090120000281, Aspergillus wentii : Aspwe1_0040642 and Aspergillus terreus NIH2624 : ATET_09584								AA		AA
AN1057	Has domain(s) with predicted catalytic activity								AA		AA
AN10609	Ortholog(s) have role in mitochondrial respiratory chain complex III assembly and integral component of mitochondrial inner membrane, mitochondrial membrane localization								AA
AN10614	Ortholog(s) have DNA binding, G-quadruplex DNA binding, ribosome binding, telomeric DNA binding, triplex DNA binding activity								AA
AN10619	Has domain(s) with predicted carboxy-lyase activity, catalytic activity, pyridoxal phosphate binding activity and role in carboxylic acid metabolic process								AA		AA
AN10634	Putative ortholog of S. cerevisiae Yme2p which has role in mitochondrial genome maintenance; expression upregulated after exposure to farnesol								AA		AA
AN10637	Ortholog(s) have calmodulin binding activity and role in lysosomal microautophagy, polyphosphate metabolic process, protein localization, vacuolar transport, vacuole fusion, non-autophagic								AA		AA
AN10645	Ortholog of A. fumigatus Af293 : Afu1g07310, A. niger CBS 513.88 : An07g09850, A. oryzae RIB40 : AO090012000984, Aspergillus wentii : Aspwe1_0040933 and Aspergillus sydowii : Aspsy1_0155965								AA		AA
AN10665	Has domain(s) with predicted ligase activity								AA		AA
AN10669	Has domain(s) with predicted transmembrane transporter activity, role in transmembrane transport and integral component of membrane localization								AA
AN10671	Has domain(s) with predicted oxidoreductase activity, zinc ion binding activity and role in oxidation-reduction process								AA		AA
AN10675	Ortholog(s) have hydrolase activity, acting on carbon-nitrogen (but not peptide) bonds, in linear amides activity and role in cellular amide catabolic process								AA
AN1068	Has domain(s) with predicted hydrolase activity, acting on ester bonds activity and role in GPI anchor metabolic process, intracellular protein transport								AA		AA
AN10685	Ortholog of A. fumigatus Af293 : Afu6g12880, Neosartorya fischeri NRRL 181 : NFIA_058820, Aspergillus wentii : Aspwe1_0166371 and Aspergillus versicolor : Aspve1_0042181								AA
AN10692	Has domain(s) with predicted transmembrane transporter activity, role in transmembrane transport and integral component of membrane localization							down	AA		AA
AN10697	Has domain(s) with predicted DNA binding, DNA-binding transcription factor activity, RNA polymerase II-specific, zinc ion binding activity and role in regulation of transcription, DNA-templated, transcription, DNA-templated								AA		AA
AN10700	Ortholog(s) have 4-hydroxy-4-methyl-2-oxoglutarate aldolase activity, oxaloacetate decarboxylase activity and role in 3,4-dihydroxybenzoate catabolic process								AA
AN10706	Ortholog of A. fumigatus Af293 : Afu6g06590, A. niger CBS 513.88 : An18g06490, A. oryzae RIB40 : AO090003000031, Neosartorya fischeri NRRL 181 : NFIA_052240 and Aspergillus clavatus NRRL 1 : ACLA_088370								AA		AA
AN10717	Ortholog(s) have role in mitochondrial respiratory chain complex II assembly								AA
AN10742	Protein of unknown function							down	AA		AA
AN1075	Ortholog(s) have ubiquitin protein ligase activity, ubiquitin-protein transferase activity								AA		AA
AN10758	Ortholog of A. fumigatus Af293 : Afu2g10430, A. niger CBS 513.88 : An02g06140, A. oryzae RIB40 : AO090011000597, Aspergillus wentii : Aspwe1_0044124 and Aspergillus sydowii : Aspsy1_0202045								AA		AA
AN10771	Has domain(s) with predicted double-stranded RNA binding activity								AA		AA
AN10780	Has domain(s) with predicted protein tyrosine phosphatase activity, protein tyrosine/serine/threonine phosphatase activity and role in dephosphorylation, protein dephosphorylation								AA		AA
AN10792	Has domain(s) with predicted zinc ion binding activity								AA		AA
AN10806	Ortholog of S. cerevisiae : RMD1, A. fumigatus Af293 : Afu2g12110, A. niger CBS 513.88 : An02g04180, A. oryzae RIB40 : AO090026000435 and Aspergillus wentii : Aspwe1_0175625								AA		AA
AN10813	Ortholog(s) have role in alkaloid biosynthetic process, ergot alkaloid biosynthetic process, secondary metabolite biosynthetic process								AA		AA
AN10820	Has domain(s) with predicted carbohydrate binding, catalytic activity and role in carbohydrate catabolic process								AA		AA
AN10830	Protein of unknown function								AA
AN10837	Ortholog(s) have amidophosphoribosyltransferase activity and role in 'de novo' IMP biosynthetic process, adenine metabolic process								AA		AA
AN10838	Has domain(s) with predicted catalytic activity, chitin binding, chitinase activity, hydrolase activity, hydrolyzing O-glycosyl compounds activity								AA		AA
AN10839	Ortholog(s) have role in retrograde transport, endosome to Golgi and cytoplasm, late endosome localization								AA		AA
AN10857	Ortholog of A. fumigatus Af293 : Afu5g13110, A. niger CBS 513.88 : An14g06040, A. oryzae RIB40 : AO090120000436, Aspergillus wentii : Aspwe1_0039047 and Aspergillus sydowii : Aspsy1_0040418								AA
AN10888	Has domain(s) with predicted FAD binding activity								AA		AA
AN10892	Has domain(s) with predicted mediator complex localization								AA		AA
AN10902	Ortholog(s) have water channel activity and role in ascospore formation, cellular response to freezing, cellular response to osmotic stress, single-species biofilm formation on inanimate substrate, transmembrane transport, water transport							down	AA		AA
AN10906	Has domain(s) with predicted DNA binding, zinc ion binding activity, role in transcription, DNA-templated and nucleus localization							down	AA		AA
AN10921	Has domain(s) with predicted hydrolase activity, acting on ester bonds activity and role in GPI anchor metabolic process, intracellular protein transport								AA		AA
AN10932	Has domain(s) with predicted hydrolase activity, hydrolase activity, acting on carbon-nitrogen (but not peptide) bonds, in linear amidines activity and role in metabolic process								AA
AN10940	Ortholog(s) have rRNA (uridine-2'-O-)-methyltransferase activity, role in rRNA methylation and mitochondrion localization								AA		AA
AN10967	Ortholog of Aspergillus versicolor : Aspve1_0096649								AA		AA
AN10969	Ortholog of A. nidulans FGSC A4 : AN10998, A. fumigatus Af293 : Afu2g01150, Afu3g01930, A. niger CBS 513.88 : An09g03620, An05g01520 and A. oryzae RIB40 : AO090012000323, AO090701000385							down	AA
AN10983	Ortholog of A. fumigatus Af293 : Afu2g01630, A. niger CBS 513.88 : An03g04810, A. oryzae RIB40 : AO090701000784, Aspergillus wentii : Aspwe1_0135351 and Aspergillus sydowii : Aspsy1_0046214								AA		AA
AN11011	Has domain(s) with predicted inorganic phosphate transmembrane transporter activity, role in phosphate ion transport and membrane localization								AA		AA
AN11023	Ortholog(s) have phosphatidylinositol-4,5-bisphosphate 5-phosphatase activity, role in phosphatidylinositol dephosphorylation and endoplasmic reticulum localization								AA		AA
AN11072	Ortholog(s) have diacylglycerol O-acyltransferase activity and role in cellular triglyceride homeostasis, ceramide metabolic process, lipid droplet formation, lipid storage, triglyceride biosynthetic process								AA
AN11087	Has domain(s) with predicted role in transmembrane transport and integral component of membrane localization								AA		AA
AN11089	Ortholog of Aspergillus carbonarius ITEM 5010 : Acar5010_505081							down	AA		AA
AN1109	Has domain(s) with predicted transmembrane transporter activity, role in transmembrane transport and integral component of membrane, membrane localization							down	AA
AN11100	Protein of unknown function							down	AA		AA
AN1112	Ortholog of A. niger CBS 513.88 : An08g04015, Aspergillus wentii : Aspwe1_0740153, Aspergillus versicolor : Aspve1_0121244 and Aspergillus clavatus NRRL 1 : ACLA_023820								AA		AA
AN11122	Has domain(s) with predicted oxidoreductase activity and role in metabolic process							down	AA		AA
AN1113	Protein of unknown function								AA		AA
AN11157	Ortholog of A. oryzae RIB40 : AO090026000764, Aspergillus flavus NRRL 3357 : AFL2T_06550, Aspergillus wentii : Aspwe1_0062270 and Aspergillus clavatus NRRL 1 : ACLA_043160							down	AA		AA
AN11180	Ortholog of A. fumigatus Af293 : Afu3g01760, A. niger CBS 513.88 : An05g01480, A. oryzae RIB40 : AO090023000156, Aspergillus wentii : Aspwe1_0120430 and Aspergillus sydowii : Aspsy1_0061462								AA		AA
AN11182	Ortholog of Aspergillus sydowii : Aspsy1_0061393								AA
AN11207	Has domain(s) with predicted oxidoreductase activity and role in metabolic process							down	AA
AN1123	Ortholog(s) have role in hyphal growth								AA		AA
AN11244	Has domain(s) with predicted membrane localization								AA
AN11274	Protein of unknown function							down	AA
AN11301	Protein of unknown function							down	AA
AN11306	Protein of unknown function							down	AA		AA
AN11471	Protein of unknown function; transcript is induced by nitrate							down	AA
AN11551	Protein of unknown function							down	AA
AN11574	Protein of unknown function								AA		AA
AN11575	Protein of unknown function								AA
AN1158	Ortholog(s) have mRNA 3'-UTR binding, mRNA 5'-UTR binding, mRNA binding, translation repressor activity, mRNA regulatory element binding activity								AA
AN11595	Protein of unknown function								AA		AA
AN11624	Protein of unknown function; transcript repressed by nitrate							down	AA		AA
AN11647	Protein of unknown function								AA
AN11697	Has domain(s) with predicted transferase activity, transferring glycosyl groups activity and membrane localization								AA		AA
AN11710	Protein of unknown function								AA		AA
AN11729	Ortholog of A. fumigatus Af293 : Afu6g12440, A. niger CBS 513.88 : An06g01600, A. oryzae RIB40 : AO090009000168, Aspergillus wentii : Aspwe1_0033695 and Aspergillus terreus NIH2624 : ATET_03273								AA		AA
AN11752	Protein of unknown function								AA		AA
AN11767	Protein of unknown function								AA
AN11798	Has domain(s) with predicted hydrolase activity							down	AA		AA
AN11799	Has domain(s) with predicted oxidoreductase activity and role in oxidation-reduction process							down	AA		AA
AN11800	Protein of unknown function								AA		AA
AN11803	Ortholog of A. fumigatus Af293 : Afu4g10840, A. niger CBS 513.88 : An04g05800, A. oryzae RIB40 : AO090003001127, Neosartorya fischeri NRRL 181 : NFIA_104840 and Aspergillus wentii : Aspwe1_0102752								AA
AN11849	Ortholog of A. fumigatus Af293 : Afu5g11355, Neosartorya fischeri NRRL 181 : NFIA_075910, Aspergillus wentii : Aspwe1_0442664 and Aspergillus versicolor : Aspve1_0035503								AA		AA
AN11858	Ortholog of A. fumigatus Af293 : Afu2g13970, A. oryzae RIB40 : AO090026000164, Neosartorya fischeri NRRL 181 : NFIA_089160 and Aspergillus wentii : Aspwe1_0119587								AA
AN11862	Ortholog(s) have role in posttranslational protein targeting to endoplasmic reticulum membrane and TRC complex, cytoplasm localization								AA		AA
AN11866	Protein of unknown function								AA		AA
AN11903	Has domain(s) with predicted aminopeptidase activity, dipeptidyl-peptidase activity, hydrolase activity and role in metabolic process, proteolysis								AA
AN11904	Ortholog of A. nidulans FGSC A4 : AN7635/binA, A. fumigatus Af293 : Afu3g02216, Afu7g00610, Afu2g00967 and A. niger CBS 513.88 : An10g00560								AA
AN11908	Has domain(s) with predicted nucleus localization								AA		AA
AN11916	Has domain(s) with predicted ATP binding activity								AA		AA
AN11917	Has domain(s) with predicted O-methyltransferase activity								AA		AA
AN1192	Ortholog of A. fumigatus Af293 : Afu1g10840, A. oryzae RIB40 : AO090038000328, Aspergillus sydowii : Aspsy1_0236946 and Aspergillus terreus NIH2624 : ATET_00276								AA		AA
AN11938	Protein of unknown function								AA		AA
AN11945	Ortholog of A. oryzae RIB40 : AO090001000155								AA		AA
AN11946	Protein of unknown function								AA		AA
AN11963	Protein of unknown function							down	AA
AN11965	Protein of unknown function								AA		AA
AN11986	Has domain(s) with predicted catalytic activity, sulfuric ester hydrolase activity and role in metabolic process								AA		AA
AN12010	Protein of unknown function							down	AA
AN12023	Protein of unknown function								AA		AA
AN12042	Ortholog(s) have mitochondrion localization								AA		AA
AN12050	Has domain(s) with predicted cofactor binding activity								AA
AN12056	Ortholog of A. fumigatus Af293 : Afu8g04230, A. oryzae RIB40 : AO090103000038, Aspergillus wentii : Aspwe1_0175151, Aspergillus sydowii : Aspsy1_0086843 and Aspergillus terreus NIH2624 : ATET_00036								AA		AA
AN12057	Ortholog(s) have mitochondrial membrane, mitochondrial outer membrane localization								AA		AA
AN12064	Protein of unknown function								AA		AA
AN12086	Has domain(s) with predicted carbon-sulfur lyase activity and role in metabolic process								AA		AA
AN12093	Ortholog of A. fumigatus Af293 : Afu6g11670, A. niger CBS 513.88 : An01g11550, Neosartorya fischeri NRRL 181 : NFIA_057330 and Aspergillus wentii : Aspwe1_0039637								AA		AA
AN12100	Has domain(s) with predicted oxidoreductase activity and role in metabolic process								AA		AA
AN12115	Protein of unknown function								AA		AA
AN12120	Has domain(s) with predicted DNA-binding transcription factor activity, RNA polymerase II-specific, zinc ion binding activity, role in regulation of transcription, DNA-templated and nucleus localization								AA		AA
AN12123	Protein of unknown function							down	AA
AN12140	Protein of unknown function								AA
AN12162	Protein of unknown function								AA		AA
AN12165	Protein of unknown function								AA		AA
AN12169	Ortholog of S. cerevisiae : AIM9, A. nidulans FGSC A4 : AN7282 and A. fumigatus Af293 : Afu1g00750, Afu3g15220, Afu5g14880, Afu6g11540, Afu8g05975								AA
AN12172	Ortholog of A. fumigatus Af293 : Afu5g02970, A. niger CBS 513.88 : An09g02540, A. oryzae RIB40 : AO090102000497, Aspergillus wentii : Aspwe1_0114955 and Aspergillus sydowii : Aspsy1_0161769								AA		AA
AN12206	Ortholog(s) have basic amino acid transmembrane transporter activity and role in basic amino acid transmembrane export from vacuole, induction of conjugation upon nitrogen starvation, negative regulation of cAMP-mediated signaling								AA		AA
AN12222	Has domain(s) with predicted role in transmembrane transport and integral component of membrane localization							down	AA
AN12241	Ortholog of A. niger CBS 513.88 : An12g08040, Aspergillus wentii : Aspwe1_0314624, Aspergillus versicolor : Aspve1_0153222 and Aspergillus niger ATCC 1015 : 42139-mRNA								AA
AN12285	Protein of unknown function								AA
AN12287	Protein of unknown function							down	AA
AN12305	Has domain(s) with predicted role in intracellular protein transport and intracellular localization								AA		AA
AN12326	Ortholog of A. nidulans FGSC A4 : AN10820, AN8890, A. fumigatus Af293 : Afu3g13650, Afu8g05805 and A. niger CBS 513.88 : An02g06090, An14g02900								AA		AA
AN12372	Protein of unknown function								AA		AA
AN12378	Protein of unknown function							down	AA
AN12379	Protein of unknown function							down	AA		AA
AN12429	Ortholog(s) have triglyceride lipase activity and role in triglyceride mobilization								AA		AA
AN1243	Has domain(s) with predicted role in transmembrane transport and integral component of membrane localization								AA		AA
AN1247	Has domain(s) with predicted integral component of membrane localization								AA		AA
AN1257	Has domain(s) with predicted transferase activity, transferring glycosyl groups activity								AA		AA
AN1290	Has domain(s) with predicted solute:proton antiporter activity, role in cation transport, transmembrane transport and integral component of membrane localization							down	AA
AN1291	Has domain(s) with predicted carbon-sulfur lyase activity and role in metabolic process								AA
AN1292	Putative diacylglycerol pyrophosphate phosphatase with a predicted role in phospholipid metabolism							down	AA
AN1331	Has domain(s) with predicted plasma membrane localization								AA		AA
AN1364	Ortholog(s) have cytoplasm, nucleus localization								AA
AN1373	Ortholog of A. fumigatus Af293 : Afu1g09140, A. niger CBS 513.88 : An08g00660, Aspergillus sydowii : Aspsy1_0037814 and Aspergillus terreus NIH2624 : ATET_08538							down	AA
AN1396	Putative FAD dependent glycerol 3-phosphate dehydrogenase with a predicted role in glycerol metabolism; transcript upregulated by growth in glycerol and after exposure to farnesol; protein induced by farnesol								AA		AA
AN1412	Ortholog of A. fumigatus Af293 : Afu8g04030, A. niger CBS 513.88 : An16g09150, A. oryzae RIB40 : AO090103000016, Aspergillus wentii : Aspwe1_0117975 and Aspergillus sydowii : Aspsy1_0144289								AA		AA
AN1423	Has domain(s) with predicted transmembrane transporter activity, role in transmembrane transport and integral component of membrane, plasma membrane localization								AA		AA
AN1451	Ortholog of A. fumigatus Af293 : Afu8g04390, A. niger CBS 513.88 : An16g08650, A. oryzae RIB40 : AO090103000064, Aspergillus wentii : Aspwe1_0116823 and Aspergillus sydowii : Aspsy1_0144294							down	AA
AN1460	Ortholog of A. fumigatus Af293 : Afu8g04510, A. niger CBS 513.88 : An16g08480, A. oryzae RIB40 : AO090023000335, Aspergillus wentii : Aspwe1_0043882 and Aspergillus sydowii : Aspsy1_0145844								AA
AN1467	Ortholog(s) have phosphoprotein phosphatase activity, protein serine/threonine phosphatase activity, role in protein dephosphorylation and mitochondrion, nuclear envelope localization								AA		AA
AN1470	Ortholog of A. fumigatus Af293 : Afu8g04620, A. oryzae RIB40 : AO090023000316, Aspergillus wentii : Aspwe1_0175199, Aspergillus sydowii : Aspsy1_0143191 and Aspergillus terreus NIH2624 : ATET_00086								AA
AN1483	Ortholog of A. fumigatus Af293 : Afu8g04780, A. niger CBS 513.88 : An16g08040, A. oryzae RIB40 : AO090005000669, Aspergillus wentii : Aspwe1_0643990 and Aspergillus sydowii : Aspsy1_0055812								AA		AA
AN1489	Has domain(s) with predicted role in transmembrane transport and integral component of membrane localization								AA
AN1497	Ortholog of A. fumigatus Af293 : Afu8g04990, A. niger CBS 513.88 : An16g07810, Neosartorya fischeri NRRL 181 : NFIA_097800 and Aspergillus versicolor : Aspve1_0125683							down	AA
AN1498	Ortholog(s) have bis(5'-nucleosyl)-tetraphosphatase activity and role in nucleoside catabolic process								AA
AN1527	Ortholog of S. cerevisiae : YDR262W, A. fumigatus Af293 : Afu8g05360, A. niger CBS 513.88 : An16g07370, A. oryzae RIB40 : AO090005000613 and Aspergillus wentii : Aspwe1_0163010								AA
AN1553	Has domain(s) with predicted role in hemolysis by symbiont of host erythrocytes, reproductive fruiting body development								AA		AA
AN1578	Ortholog of Aspergillus wentii : Aspwe1_0177575, Aspergillus niger ATCC 1015 : 42227-mRNA, Aspergillus sydowii : Aspsy1_0046412 and Aspergillus brasiliensis : Aspbr1_0045436								AA
AN1594	Protein with homology to entkaurene synthases; member of the PbcR-activated diterpene cluster								AA		AA
AN1595	Putative elongation factor 1-gamma; member of the PbcR-activated diterpene cluster								AA		AA
AN1602	Putative beta-1,4-endoglucanase; protein with cellulase activity, involved in degradation of glucans								AA		AA
AN1603	Ortholog of A. fumigatus Af293 : Afu8g05985, Neosartorya fischeri NRRL 181 : NFIA_098760, NFIA_099140, Aspergillus wentii : Aspwe1_0689083 and Aspergillus versicolor : Aspve1_0037404								AA		AA
AN1605	Ortholog of Aspergillus sydowii : Aspsy1_0679421								AA		AA
AN1609	Protein of unknown function							down	AA		AA
AN1615	Protein of unknown function							down	AA		AA
AN1617	Protein of unknown function								AA		AA
AN1663	Has domain(s) with predicted ATP binding, phosphotransferase activity, alcohol group as acceptor activity, role in lipopolysaccharide biosynthetic process and membrane localization								AA		AB	AB
AN1670	Ortholog of A. niger CBS 513.88 : An04g03830, Aspergillus wentii : Aspwe1_0047606, Aspergillus versicolor : Aspve1_0079774 and Aspergillus niger ATCC 1015 : 124618-mRNA								AA
AN1680	Putative nonribosomal peptide synthase (NRPS)-like enzyme								AA		AA
AN1691	Has domain(s) with predicted role in transmembrane transport and integral component of membrane localization								AA		AA
AN1705	Has domain(s) with predicted DNA-binding transcription factor activity, RNA polymerase II-specific, nucleic acid binding, zinc ion binding activity, role in regulation of transcription, DNA-templated and nucleus localization								AA
AN1736	Has domain(s) with predicted DNA-binding transcription factor activity, RNA polymerase II-specific, zinc ion binding activity, role in regulation of transcription, DNA-templated and nucleus localization								AA		AA
AN1739	Protein of unknown function							down	AA		AA
AN1740	Protein of unknown function								AA		AA
AN1753	Ortholog of S. cerevisiae : FMP52, A. fumigatus Af293 : Afu6g08930, A. niger CBS 513.88 : An11g06680, A. oryzae RIB40 : AO090001000572, AO090010000132 and Aspergillus wentii : Aspwe1_0706048								AA
AN1772	Type B feruloyl esterase								AA		AA
AN1787	Predicted UDP-N-acetylmuramate dehydrogenase; predicted secondary metabolism gene cluster member; coregulated with the PKS AN1784							down	AA
AN1795	Ortholog(s) have cobalt ion transmembrane transporter activity, zinc ion transmembrane transporter activity								AA
AN1824	Has domain(s) with predicted DNA binding, DNA-binding transcription factor activity, RNA polymerase II-specific, zinc ion binding activity and role in regulation of transcription, DNA-templated, transcription, DNA-templated								AA		AA
AN1865	Putative sugar transporter							down	AA
AN1876	Ortholog(s) have role in cellular manganese ion homeostasis, mitochondrion organization								AA
AN1891	Putative asparaginase with a predicted role in asparagine metabolism								AA		A-B	A-B
AN1939	Ortholog of A. fumigatus Af293 : Afu4g13210, Aspergillus wentii : Aspwe1_0099602, Aspergillus sydowii : Aspsy1_0053881 and Aspergillus terreus NIH2624 : ATET_03204								AA		AA
AN1987	Ortholog of A. fumigatus Af293 : Afu4g10500, A. niger CBS 513.88 : An04g06170, A. oryzae RIB40 : AO090003001161, Aspergillus wentii : Aspwe1_0047460 and Aspergillus sydowii : Aspsy1_0316623								AA		AA
AN1990	Putative homocitrate synthase with a predicted role in pyruvate metabolism								AA
AN20053	Protein of unknown function								AA		AA
AN2024	Protein of unknown function							down	AA		AA
AN2037	Predicted NAD binding oxidoreductase; predicted secondary metabolism gene cluster member								AA
AN2055	Ortholog of A. fumigatus Af293 : Afu4g09960, A. niger CBS 513.88 : An04g07090, A. oryzae RIB40 : AO090003001238, Aspergillus wentii : Aspwe1_0102496 and Aspergillus sydowii : Aspsy1_0326546								AA		AA
AN2063	Ortholog(s) have role in endoplasmic reticulum unfolded protein response								AA
AN2098	Ortholog of Aspergillus wentii : Aspwe1_0046221, Aspergillus versicolor : Aspve1_0038126, Aspergillus zonatus : Aspzo1_0128775 and Aspergillus sydowii : Aspsy1_0026522								AA
AN2107	Has domain(s) with predicted GTP binding, GTPase activity								AA		AA
AN2108	Ortholog of Aspergillus wentii : Aspwe1_0149185, Aspergillus versicolor : Aspve1_0123190, Aspve1_0187353, Aspergillus niger ATCC 1015 : 178726-mRNA and Aspergillus sydowii : Aspsy1_0039267, Aspsy1_0391823								AA		AA
AN2154	Possible pseudogene, similar to phosphatidylethanolamine N-methyltransferase								AA
AN2219	Ortholog of A. fumigatus Af293 : Afu5g07110, A. niger CBS 513.88 : An17g00330, A. oryzae RIB40 : AO090701000269, Aspergillus wentii : Aspwe1_0167476 and Aspergillus sydowii : Aspsy1_0142143								AA
AN2220	Protein of unknown function							down	AA
AN2257	Ortholog of A. fumigatus Af293 : Afu3g14870, Afu5g06570, A. niger CBS 513.88 : An17g01080, Neosartorya fischeri NRRL 181 : NFIA_036550, NFIA_062380 and Aspergillus wentii : Aspwe1_0045706, Aspwe1_0047992								AA		AA
AN2279	Ortholog(s) have role in ER-dependent peroxisome organization, endoplasmic reticulum inheritance, endoplasmic reticulum organization and endoplasmic reticulum tubular network membrane organization, more								AA		AA
AN2289	Ortholog(s) have maltose:proton symporter activity, sucrose:proton symporter activity and role in maltose import across plasma membrane, sucrose import across plasma membrane								AA		AA
AN2320	Has domain(s) with predicted monooxygenase activity, oxidoreductase activity, acting on paired donors, with incorporation or reduction of molecular oxygen activity and role in oxidation-reduction process								AA		AA
AN2339	Protein of unknown function							down	AA		AA
AN2351	Putative zinc-containing alcohol dehydrogenase; intracellular, menadione stress-induced protein							down	AA
AN2367	Putative Zn(II)2Cys6 transcription factor; PalA-dependent expression independent of pH								AA		AA
AN2375	Has domain(s) with predicted DNA-binding transcription factor activity, RNA polymerase II-specific, zinc ion binding activity, role in regulation of transcription, DNA-templated and nucleus localization								AA		AA
AN2402	Has domain(s) with predicted oxidoreductase activity and role in metabolic process								AA		AA
AN2410	Has domain(s) with predicted hydrolase activity and role in cellular metabolic process								AA		AA
AN2427	Transcript induced in response to calcium dichloride in a CrzA-dependent manner								AA		AA
AN2477	Ortholog(s) have phospholipid scramblase activity, voltage-gated calcium channel activity, role in ion transmembrane transport, phospholipid translocation and integral component of membrane localization								AA		AA
AN2486	Protein of unknown function							down	AA		AA
AN2515	Has domain(s) with predicted oxidoreductase activity and role in oxidation-reduction process								AA		AA
AN2531	Has domain(s) with predicted role in transmembrane transport and integral component of membrane localization								AA		AA
AN2540	Ortholog of Aspergillus versicolor : Aspve1_0051083 and Aspergillus sydowii : Aspsy1_0087014								AA		AA
AN2544	Has domain(s) with predicted transmembrane transporter activity, role in transmembrane transport and integral component of membrane, membrane localization								AA
AN2553	Has domain(s) with predicted DNA binding, DNA-binding transcription factor activity, RNA polymerase II-specific, zinc ion binding activity and role in regulation of transcription, DNA-templated, transcription, DNA-templated								AA		AA
AN2633	Has domain(s) with predicted hydrolase activity, hydrolyzing O-glycosyl compounds activity and role in carbohydrate metabolic process								AA		AA
AN2637	Ortholog of A. fumigatus Af293 : Afu2g13650, A. oryzae RIB40 : AO090001000291, AO090005001139, AO090026000243, Aspergillus wentii : Aspwe1_0045467 and Aspergillus sydowii : Aspsy1_0035381, Aspsy1_0047966								AA		AA
AN2696	Protein of unknown function								AA		AA
AN2703	Ortholog of A. fumigatus Af293 : Afu5g13990, A. niger CBS 513.88 : An14g05420, A. oryzae RIB40 : AO090113000104, Aspergillus wentii : Aspwe1_0453318 and Aspergillus sydowii : Aspsy1_0155176								AA
AN2725	Has domain(s) with predicted DNA binding, DNA-binding transcription factor activity, RNA polymerase II-specific, zinc ion binding activity and role in regulation of transcription, DNA-templated, transcription, DNA-templated								AA		AA
AN2776	Ortholog of A. fumigatus Af293 : Afu3g05980, A. niger CBS 513.88 : An11g10620, A. oryzae RIB40 : AO090020000068, Aspergillus wentii : Aspwe1_0173669 and Aspergillus sydowii : Aspsy1_0029855							down	AA
AN2791	Protein of unknown function								AA		AA
AN2797	Protein of unknown function								AA		AA
AN2800	Ortholog of A. fumigatus Af293 : Afu8g01700, Neosartorya fischeri NRRL 181 : NFIA_095280, Aspergillus versicolor : Aspve1_0082293 and Aspergillus clavatus NRRL 1 : ACLA_044160								AA		A-B	A-B
AN2801	Has domain(s) with predicted oxidoreductase activity and role in oxidation-reduction process								AA		AA
AN2811	Has domain(s) with predicted protein dimerization activity								AA		AA
AN2817	Protein of unknown function							down	AA		AA
AN2821	Ortholog of A. fumigatus Af293 : Afu2g00180, Afu2g17480, A. niger CBS 513.88 : An03g05360, An04g09420, A. oryzae RIB40 : AO090102000063, AO090009000716 and Aspergillus wentii : Aspwe1_0163996								AA		AA
AN2854	Ortholog(s) have DNA replication origin binding, DNA-binding transcription activator activity, RNA polymerase II-specific, DNA-binding transcription repressor activity and RNA polymerase II-specific, more								AA
AN2863	Ortholog of A. fumigatus Af293 : Afu3g11850, A. niger CBS 513.88 : An02g07670, A. oryzae RIB40 : AO090003000748, Neosartorya fischeri NRRL 181 : NFIA_065470 and Aspergillus wentii : Aspwe1_0037077								AA
AN2877	Ortholog(s) have lipid binding, oxysterol binding, phosphatidic acid binding, phosphatidylinositol-4,5-bisphosphate binding, phosphatidylinositol-4-phosphate binding, sterol transfer activity								AA		AA
AN2940	Ortholog of A. fumigatus Af293 : Afu3g08240, A. niger CBS 513.88 : An02g11810, A. oryzae RIB40 : AO090005001456, Aspergillus wentii : Aspwe1_0052338 and Aspergillus sydowii : Aspsy1_0056317								AA
AN2956	Ortholog of Aspergillus versicolor : Aspve1_0081721 and Aspergillus sydowii : Aspsy1_0087389								AA
AN2974	Has domain(s) with predicted transmembrane transporter activity, role in transmembrane transport and integral component of membrane, membrane localization								AA		AA
AN3005	Ortholog of A. fumigatus Af293 : Afu3g08750, A. niger CBS 513.88 : An16g02150, A. oryzae RIB40 : AO090005001393 and Aspergillus sydowii : Aspsy1_0042521								AA
AN3022	Ortholog of A. fumigatus Af293 : Afu3g08900, A. niger CBS 513.88 : An16g02430, A. oryzae RIB40 : AO090005001346, Aspergillus wentii : Aspwe1_0041802 and Aspergillus sydowii : Aspsy1_0042503								AA		AA
AN3023	Ortholog of A. fumigatus Af293 : Afu3g08870, A. niger CBS 513.88 : An16g02440, A. oryzae RIB40 : AO090005001347, Neosartorya fischeri NRRL 181 : NFIA_068250 and Aspergillus wentii : Aspwe1_0041800								AA		AA
AN3063	Ortholog(s) have nucleus localization								AA
AN3105	Has domain(s) with predicted transmembrane transporter activity, role in transmembrane transport and integral component of membrane localization								AA
AN3148	Ortholog(s) have role in ascospore wall assembly, ascospore-type prospore membrane assembly, protein localization to prospore membrane and plasma membrane, prospore membrane localization								AA
AN3157	Has domain(s) with predicted sulfate transmembrane transporter activity, role in sulfate transport and integral component of membrane localization								AA		AA
AN3180	Ortholog of Aspergillus versicolor : Aspve1_0051207 and Aspergillus sydowii : Aspsy1_0056131								AA		AA
AN3190	Ortholog of A. fumigatus Af293 : Afu4g02920, A. niger CBS 513.88 : An14g02990, A. oryzae RIB40 : AO090001000192, Aspergillus wentii : Aspwe1_0061505 and Aspergillus sydowii : Aspsy1_1159424								AA		AA
AN3204	Putative MFS alpha-glucoside transporter; ortholog of A. fumigatus Afu4g02650							down	AA		AA
AN3231	Has domain(s) with predicted metal ion transmembrane transporter activity, role in metal ion transport, transmembrane transport and membrane localization								AA
AN3232	Ortholog(s) have pantothenate transmembrane transporter activity, role in pantothenate import across plasma membrane and plasma membrane localization								AA		AA
AN3243	Ortholog of A. niger CBS 513.88 : An11g08150, Neosartorya fischeri NRRL 181 : NFIA_040880, Aspergillus wentii : Aspwe1_0036368 and Aspergillus versicolor : Aspve1_0033884								AA		AA
AN3301	Has domain(s) with predicted role in transmembrane transport and integral component of membrane localization								AA		AA
AN3397	Ortholog of A. niger CBS 513.88 : An03g00310, Aspergillus niger ATCC 1015 : 51389-mRNA, Aspergillus zonatus : Aspzo1_0142097 and Aspergillus sydowii : Aspsy1_1179377								AA		AA
AN3425	Ortholog of A. fumigatus Af293 : Afu3g05870, A. niger CBS 513.88 : An11g10730, A. oryzae RIB40 : AO090020000056, Aspergillus wentii : Aspwe1_0029421 and Aspergillus sydowii : Aspsy1_0030105								AA		A-B	A-B
AN3442	Ortholog of A. fumigatus Af293 : Afu3g05640, A. niger CBS 513.88 : An11g11000, Aspergillus wentii : Aspwe1_0173703, Aspergillus sydowii : Aspsy1_0030125 and Aspergillus terreus NIH2624 : ATET_08971								AA		AA
AN3449	Ortholog(s) have thiol-dependent ubiquitin-specific protease activity and role in protein deubiquitination, regulation of transcription, DNA-templated								AA		AA
AN3464	Has domain(s) with predicted protein-L-isoaspartate (D-aspartate) O-methyltransferase activity and role in cellular protein modification process								AA		AA
AN3465	Ortholog of Aspergillus versicolor : Aspve1_0052031								AA
AN3476	Ortholog of A. fumigatus Af293 : Afu8g01060, A. niger CBS 513.88 : An15g03830, Neosartorya fischeri NRRL 181 : NFIA_094500, Aspergillus wentii : Aspwe1_0037886 and Aspergillus niger ATCC 1015 : 40584-mRNA								AA
AN3484	Ortholog of Aspergillus acidus : Aspfo1_0160947							down	AA		AA
AN3485	Ortholog of Aspergillus acidus : Aspfo1_0060189								AA		AA
AN3488	Ortholog of A. oryzae RIB40 : AO090012000165, Aspergillus flavus NRRL 3357 : AFL2T_03092, Aspergillus versicolor : Aspve1_0195726 and Aspergillus sydowii : Aspsy1_0164683								AA		AA
AN3489	Ortholog of A. fumigatus Af293 : Afu5g07540, A. niger CBS 513.88 : An09g00920, An16g03850, A. oryzae RIB40 : AO090701000444, Aspergillus wentii : Aspwe1_0167521 and Aspergillus sydowii : Aspsy1_0137783								AA		AA
AN3506	Putative transcription factor; predicted role in secondary metabolite production								AA		AA
AN3536	Has domain(s) with predicted FAD binding, oxidoreductase activity and role in metabolic process								AA		AA
AN3539	Ortholog of A. nidulans FGSC A4 : AN3540, A. fumigatus Af293 : Afu8g00120, A. oryzae RIB40 : AO090038000188, AO090026000095 and Neosartorya fischeri NRRL 181 : NFIA_032270								AA		AA
AN3540	Ortholog of A. nidulans FGSC A4 : AN3539, A. fumigatus Af293 : Afu8g00120, A. oryzae RIB40 : AO090038000188, AO090026000095 and Neosartorya fischeri NRRL 181 : NFIA_032270								AA		AA
AN3564	Has domain(s) with predicted oxidoreductase activity and role in metabolic process								AA
AN3565	Has domain(s) with predicted hydrolase activity								AA
AN3612	Putative polyketide synthase								AA		AA
AN3630	Ortholog of A. fumigatus Af293 : Afu5g01370, Neosartorya fischeri NRRL 181 : NFIA_040730, Aspergillus versicolor : Aspve1_0032027 and Aspergillus fumigatus A1163 : AFUB_049880								AA		AA
AN3644	Ortholog(s) have ubiquitin conjugating enzyme activity, ubiquitin-protein transferase activity and role in free ubiquitin chain polymerization, postreplication repair, protein K63-linked ubiquitination, protein polyubiquitination								AA		AA
AN3680	Ortholog of A. fumigatus Af293 : Afu4g12500, A. niger CBS 513.88 : An01g07980, Aspergillus wentii : Aspwe1_0033896 and Aspergillus zonatus : Aspzo1_0129782								AA		AA
AN3691	Ortholog(s) have role in endocytic recycling, filamentous growth and hyphal tip localization								AA		AA
AN3697	Protein of unknown function								AA		AA
AN3699	Protein of unknown function							down	AA		AA
AN3706	S. cerevisiae ortholog RPS10A has role in rRNA export from nucleus; palA-dependent expression independent of pH								AA
AN3708	Ortholog(s) have adenosine 5'-monophosphoramidase activity and role in nucleotide metabolic process								AA
AN3751	Transcript induced in response to calcium dichloride in a CrzA-dependent manner								AA		AA
AN3755	Has domain(s) with predicted protein kinase binding activity and role in regulation of cyclin-dependent protein serine/threonine kinase activity								AA		AA
AN3768	Has domain(s) with predicted DNA-binding transcription factor activity, RNA polymerase II-specific, zinc ion binding activity, role in regulation of transcription, DNA-templated and nucleus localization								AA		AA
AN3779	Ortholog(s) have exopolyphosphatase activity, role in polyphosphate catabolic process and cytoplasm localization								AA
AN3781	Has domain(s) with predicted inorganic phosphate transmembrane transporter activity, role in phosphate ion transport and membrane localization								AA		AA
AN3812	Ortholog(s) have role in U1 snRNA 3'-end processing, U4 snRNA 3'-end processing and U5 snRNA 3'-end processing, more								AA
AN3829	Putative succinate-semialdehyde dehydrogenase [NAD(P)+] with a predicted role in 4-aminobutyrate (GABA) shunt								AA		AA
AN3886	Protein of unknown function							down	AA
AN3888	Ortholog(s) have basic amino acid transmembrane transporter activity								AA
AN3898	Ortholog of A. fumigatus Af293 : Afu3g14180, A. niger CBS 513.88 : An09g04380, A. oryzae RIB40 : AO090012000661 and Aspergillus wentii : Aspwe1_0038053								AA		AA
AN3905	Has domain(s) with predicted phosphatase activator activity								AA
AN3918	Ortholog(s) have aminopeptidase activity, role in protein catabolic process in the vacuole and fungal-type vacuole localization								AA		AA
AN3972	Has domain(s) with predicted catalytic activity, hydrolase activity								AA		AA
AN3994	Ortholog of A. nidulans FGSC A4 : AN5182, AN2782, A. fumigatus Af293 : Afu1g01650, Afu2g00470, Afu6g07130, Afu7g00770, A. niger CBS 513.88 : An15g02620 and A. oryzae RIB40 : AO090005000527, AO090012000936								AA		AA
AN3995	Putative delta-aminolevulinic acid dehydratase								AA		AA
AN4018	Has domain(s) with predicted peptidase activity and role in proteolysis								AA		AA
AN4039	Ortholog(s) have thiosulfate sulfurtransferase activity								AA		AA
AN4048	Has domain(s) with predicted endodeoxyribonuclease activity, producing 5'-phosphomonoesters activity								AA		AA
AN4057	Has domain(s) with predicted protein tyrosine/serine/threonine phosphatase activity and role in protein dephosphorylation								AA		AA
AN4063	Ortholog of A. fumigatus Af293 : Afu1g05380, Neosartorya fischeri NRRL 181 : NFIA_019370, Aspergillus wentii : Aspwe1_0037253 and Aspergillus versicolor : Aspve1_0054332								AA		AA
AN4089	Ortholog of A. fumigatus Af293 : Afu1g05690, A. niger CBS 513.88 : An18g03450, A. oryzae RIB40 : AO090009000365, Aspergillus wentii : Aspwe1_0104096 and Aspergillus sydowii : Aspsy1_0057643								AA		AA
AN4153	Has domain(s) with predicted catalytic activity, pyridoxal phosphate binding activity and role in biosynthetic process								AA		AA
AN4156	Has domain(s) with predicted catalytic activity, pyridoxal phosphate binding activity								AA
AN4161	Ortholog of S. cerevisiae : YMR114C, A. fumigatus Af293 : Afu4g13150, A. niger CBS 513.88 : An01g08840, Aspergillus wentii : Aspwe1_0033808 and Aspergillus sydowii : Aspsy1_0090938								AA
AN4164	Ortholog(s) have mitochondrion localization								AA		AA
AN4171	Ortholog(s) have role in TOR signaling, actin cytoskeleton organization, actin filament bundle assembly, eisosome assembly, endosomal transport and establishment or maintenance of actin cytoskeleton polarity, more								AA
AN4174	Putative lactoylglutathione lyase with a predicted role in the methylglyoxal bypass								AA		AA
AN4237	Ortholog of A. fumigatus Af293 : Afu1g06160, A. niger CBS 513.88 : An18g05340, A. oryzae RIB40 : AO090001000437, Aspergillus wentii : Aspwe1_0026108 and Aspergillus sydowii : Aspsy1_0153979								AA
AN4266	Has domain(s) with predicted role in transmembrane transport and integral component of membrane localization								AA
AN4276	Protein of unknown function							down	AA
AN4277	Ortholog(s) have glucose transmembrane transporter activity, role in cellular response to drug, glucose transmembrane transport and plasma membrane localization								AA		AA
AN4359	Has domain(s) with predicted zinc ion binding activity								AA		AA
AN4365	Ortholog(s) have role in meiotic mismatch repair, mismatch repair, reciprocal meiotic recombination and MutLgamma complex, nucleus localization								AA		AA
AN4403	Ortholog of A. fumigatus Af293 : Afu4g06920, Aspergillus wentii : Aspwe1_0167198, Aspergillus sydowii : Aspsy1_0162965 and Aspergillus terreus NIH2624 : ATET_05541								AA		AA
AN4421	Has domain(s) with predicted catalytic activity, oxidoreductase activity								AA		A-B	A-B
AN4478	Ortholog(s) have L-arginine transmembrane transporter activity, potassium:chloride symporter activity								AA
AN4530	Ortholog(s) have role in endoplasmic reticulum unfolded protein response, negative regulation of G0 to G1 transition								AA		AA
AN4531	Ortholog of A. niger CBS 513.88 : An07g07290, Aspergillus tubingensis : Asptu1_0057895, Aspergillus versicolor : Aspve1_0053937 and Aspergillus sydowii : Aspsy1_0155689								AA		AA
AN4537	Has domain(s) with predicted intracellular localization								AA		AA
AN4548	Ortholog of A. fumigatus Af293 : Afu2g02570, A. niger CBS 513.88 : An07g06020, A. oryzae RIB40 : AO090026000600, Aspergillus wentii : Aspwe1_0049105 and Aspergillus sydowii : Aspsy1_0032959								AA		AA
AN4549	Ortholog(s) have mitochondrion localization								AA		AA
AN4553	Ortholog(s) have plasma membrane localization								AA		AA
AN4588	Protein of unknown function								AA		AA
AN4619	Ortholog of Aspergillus versicolor : Aspve1_0073054 and Aspergillus sydowii : Aspsy1_0070056								AA		AA
AN4627	Protein of unknown function								AA		A-B	A-B
AN4628	Protein of unknown function							down	AA
AN4647	Ortholog(s) have role in cellular response to drug							down	AA
AN4684	Putative triacylglycerol lipase with a predicted role in glycerolipid metabolism								AA		AA
AN4696	Ortholog of A. fumigatus Af293 : Afu5g08820, A. niger CBS 513.88 : An07g04590, A. oryzae RIB40 : AO090020000448, Aspergillus wentii : Aspwe1_0023715 and Aspergillus sydowii : Aspsy1_0033180								AA		AA
AN4714	Ortholog(s) have tRNA threonylcarbamoyladenosine dehydratase activity, role in cyclic threonylcarbamoyladenosine biosynthetic process and mitochondrial outer membrane localization								AA
AN4759	Predicted Rab guanine nucleotide exchange factor (Rab GEF)								AA		AA
AN4779	Ortholog of A. fumigatus Af293 : Afu3g06660, A. niger CBS 513.88 : An11g09650, A. oryzae RIB40 : AO090020000332, Aspergillus wentii : Aspwe1_0173599 and Aspergillus sydowii : Aspsy1_0087834								AA		AA
AN4780	Has domain(s) with predicted FMN binding, oxidoreductase activity, pyridoxamine-phosphate oxidase activity and role in oxidation-reduction process								AA		AA
AN4781	Ortholog(s) have ligase activity and role in protein lipoylation								AA		AA
AN4816	Ortholog of A. niger CBS 513.88 : An02g13620, A. oryzae RIB40 : AO090020000221, Aspergillus versicolor : Aspve1_0128410, Aspergillus niger ATCC 1015 : 47169-mRNA and Aspergillus sydowii : Aspsy1_0029739								AA		AA
AN4831	Has domain(s) with predicted oxidoreductase activity and role in oxidation-reduction process								AA		AB	AB
AN4857	Has domain(s) with predicted transferase activity, transferring phosphorus-containing groups activity								AA
AN4901	Putative glutaminase A with a predicted role in glutamate and glutamine metabolism								AA
AN4916	Ortholog(s) have role in ribosome biogenesis and cell surface, small-subunit processome localization								AA
AN4918	Ortholog(s) have intracellular localization								AA		AA
AN4941	Ortholog of A. fumigatus Af293 : Afu3g10470, A. niger CBS 513.88 : An16g04410, A. oryzae RIB40 : AO090003000593, Aspergillus wentii : Aspwe1_0169039 and Aspergillus sydowii : Aspsy1_0788739								AA
AN4946	Ortholog of A. fumigatus Af293 : Afu3g10410, A. niger CBS 513.88 : An16g04340, A. oryzae RIB40 : AO090003000590, Aspergillus wentii : Aspwe1_0169033 and Aspergillus sydowii : Aspsy1_0087645								AA		AA
AN4955	Has domain(s) with predicted zinc ion binding activity								AA
AN4966	Has domain(s) with predicted role in lipid storage								AA		AA
AN4972	Has domain(s) with predicted DNA binding, DNA-binding transcription factor activity, RNA polymerase II-specific, zinc ion binding activity and role in regulation of transcription, DNA-templated, transcription, DNA-templated								AA
AN4977	Ortholog(s) have mitochondrion localization								AA		A-B	A-B
AN4988	Ortholog(s) have intracellular localization							down	AA		AA
AN5016	Ortholog of Aspergillus sydowii : Aspsy1_0147753								AA		AA
AN5021	Ortholog(s) have role in conidium formation, regulation of growth rate								AA		AA
AN5022	Dynactin p25 subunit; required for dynein/dynactin localization to the hyphal tip region and for interactions between dynein and the early endosome; contains several hexapeptide repeats								AA		AA
AN5047	Protein of unknown function								AA
AN5079	Protein of unknown function							down	AA		AA
AN5082	Has domain(s) with predicted GTP binding, GTPase activity, structural constituent of cytoskeleton activity, role in microtubule-based process, protein polymerization and microtubule localization								AA		AA
AN5109	Ortholog(s) have alditol:NADP+ 1-oxidoreductase activity, aldo-keto reductase (NADP) activity, alpha-keto amide reductase activity and alpha-keto ester reductase activity, more								AA		AA
AN5110	Ortholog of A. fumigatus Af293 : Afu1g07640, A. niger CBS 513.88 : An07g10280, A. oryzae RIB40 : AO090012001016, Aspergillus wentii : Aspwe1_0055251 and Aspergillus sydowii : Aspsy1_0033405								AA		A-B	A-B
AN5123	Has domain(s) with predicted oxidoreductase activity								AA
AN5125	Has domain(s) with predicted identical protein binding, serine-type endopeptidase activity and role in negative regulation of catalytic activity								AA		AA
AN5157	Ortholog of A. fumigatus Af293 : Afu1g07050, A. niger CBS 513.88 : An07g09610, A. oryzae RIB40 : AO090012000957, Aspergillus wentii : Aspwe1_0051655 and Aspergillus sydowii : Aspsy1_0091619								AA
AN5178	Putative glycerol dehydrogenase with a predicted role in glycerol metabolism								AA
AN5185	Ortholog of A. fumigatus Af293 : Afu1g07150, A. niger CBS 513.88 : An07g09700, A. oryzae RIB40 : AO090012000967, Aspergillus wentii : Aspwe1_0040915 and Aspergillus sydowii : Aspsy1_0047692								AA
AN5200	Putative kynurenine 3-monooxygenase with a predicted role in aromatic amino acid biosynthesis								AA		AA
AN5209	Putative F-box protein								AA
AN5222	Ortholog(s) have structural constituent of ribosome activity and role in maturation of SSU-rRNA from tricistronic rRNA transcript (SSU-rRNA, 5.8S rRNA, LSU-rRNA), ribosomal small subunit assembly								AA
AN5231	Putative exo-arabinanase								AA		A-B	A-B
AN5234	Has domain(s) with predicted metal ion binding, oxidoreductase activity and role in oxidation-reduction process								AA
AN5260	Ortholog of A. nidulans FGSC A4 : AN6683, AN8537, A. fumigatus Af293 : Afu4g06200 and A. niger CBS 513.88 : An12g04370, An11g06510, An14g01260								AA		AA
AN5268	Has domain(s) with predicted nucleic acid binding, nucleotide binding activity							down	AA
AN5276	Has domain(s) with predicted oxidoreductase activity and role in oxidation-reduction process								AA		AA
AN5308	Protein of unknown function								AA		A-B	A-B
AN5317	Ortholog of A. fumigatus Af293 : Afu6g00280, A. oryzae RIB40 : AO090003000248, AO090010000078, Neosartorya fischeri NRRL 181 : NFIA_047440 and Aspergillus versicolor : Aspve1_0031634								AA		AA
AN5323	Has domain(s) with predicted transmembrane transporter activity, role in transmembrane transport and integral component of membrane, membrane localization							down	AA		AA
AN5328	Has domain(s) with predicted catalytic activity, ferric iron binding, iron ion binding, oxidoreductase activity, acting on single donors with incorporation of molecular oxygen, incorporation of two atoms of oxygen activity								AA
AN5357	Predicted glycosylphosphatidylinositol (GPI)-anchored protein								AA		AA
AN5371	Ortholog of A. nidulans FGSC A4 : AN6727, AN0386, A. fumigatus Af293 : Afu1g01610, Afu4g01060, Afu6g03180, Afu7g05880 and A. niger CBS 513.88 : An04g08650, An07g02000								AA
AN5372	Transcript induced in response to calcium dichloride in a CrzA-dependent manner							down	AA		AA
AN5383	Protein of unknown function								AA
AN5385	Protein of unknown function								AA		AA
AN5390	Has domain(s) with predicted DNA-binding transcription factor activity, RNA polymerase II-specific, zinc ion binding activity, role in regulation of transcription, DNA-templated and nucleus localization								AA		AA
AN5398	Has domain(s) with predicted iron ion binding, oxidoreductase activity, acting on single donors with incorporation of molecular oxygen, incorporation of two atoms of oxygen activity and role in oxidation-reduction process								AA
AN5399	Ortholog of A. fumigatus Af293 : Afu2g15280, A. niger CBS 513.88 : An18g02600, A. oryzae RIB40 : AO090003001548, Neosartorya fischeri NRRL 181 : NFIA_090520 and Aspergillus versicolor : Aspve1_0045700							down	AA
AN5404	Ortholog(s) have role in ER-dependent peroxisome organization, endoplasmic reticulum inheritance and endoplasmic reticulum tubular network maintenance, more								AA		A-B	A-B
AN5462	Protein of unknown function								AA		AA
AN5481	Has domain(s) with predicted Rho guanyl-nucleotide exchange factor activity, phospholipid binding activity, role in regulation of Rho protein signal transduction and intracellular localization							down	AA		AA
AN5488	Protein of unknown function							down	AA
AN5500	Protein of unknown function								AA		AA
AN5564	Putative phosphatidyl synthase; intracellular, menadione stress-induced protein; transcript and protein upregulated after exposure to farnesol								AA		AA
AN5576	Ortholog of A. fumigatus Af293 : Afu4g11590, A. niger CBS 513.88 : An04g04860, A. oryzae RIB40 : AO090003001061, Aspergillus wentii : Aspwe1_0166635 and Aspergillus sydowii : Aspsy1_0149581								AA		AA
AN5589	Putative glycerol kinase with a predicted role in glycerol metabolism; required for growth on glycerol; transcript upregulated by growth in glycerol								AA		AA
AN5607	Ortholog(s) have peptidase activator activity, proteasome binding activity								AA		AA
AN5630	Ortholog(s) have protein-lysine N-methyltransferase activity								AA		AA
AN5657	Ortholog of A. fumigatus Af293 : Afu4g13590, A. niger CBS 513.88 : An01g09400, A. oryzae RIB40 : AO090009000210, Aspergillus wentii : Aspwe1_0047218 and Aspergillus sydowii : Aspsy1_0199958								AA		AA
AN5671	Has domain(s) with predicted phospholipid binding activity								AA		AA
AN5721	Ortholog(s) have role in proteasome-mediated ubiquitin-dependent protein catabolic process								AA		AA
AN5749	Has domain(s) with predicted hydrolase activity and role in metabolic process								AA
AN5764	Transcript induced by light in in developmentally competent mycelia								AA		AA
AN5782	Has domain(s) with predicted catalytic activity and role in metabolic process								AA		AA
AN5804	Has domain(s) with predicted metal ion binding activity							down	AA
AN5856	Ortholog(s) have magnesium ion transmembrane transporter activity, role in cellular magnesium ion homeostasis, magnesium ion transmembrane transport and fungal-type vacuole membrane, vacuole-mitochondrion membrane contact site localization								AA		AA
AN5857	Ortholog(s) have role in cellular response to biotic stimulus, filamentous growth, filamentous growth of a population of unicellular organisms in response to biotic stimulus, vacuole inheritance								AA
AN5930	Has domain(s) with predicted hydrolase activity							down	AA
AN5935	Has domain(s) with predicted transmembrane transporter activity, role in transmembrane transport and integral component of membrane localization								AA		AA
AN5941	Protein of unknown function								AA		AA
AN5965	Ortholog of A. fumigatus Af293 : Afu2g10540, A. niger CBS 513.88 : An02g06010, A. oryzae RIB40 : AO090011000586, Aspergillus wentii : Aspwe1_0175404 and Aspergillus sydowii : Aspsy1_0151977								AA		AA
AN5966	Putative zinc-finger DNA binding protein; locus contains the conserved upstream open reading frame (uORF) AN5966-uORF								AA
AN6004	Protein with an RNA recognition motif; protein expressed at increased levels in a hapX mutant versus wild-type; expression upregulated after exposure to farnesol								AA		AA
AN6009	Ortholog of A. fumigatus Af293 : Afu2g09990, A. niger CBS 513.88 : An16g05070, A. oryzae RIB40 : AO090011000637, Aspergillus wentii : Aspwe1_0054410 and Aspergillus sydowii : Aspsy1_0057911								AA		AA
AN6032	Putative multifunctional enzyme with a predicted role in folate biosynthesis								AA		AA
AN6071	Has domain(s) with predicted membrane localization								AA		AA
AN6114	Ortholog(s) have 5'-deoxyribose-5-phosphate lyase activity, DNA-directed 5'-3' RNA polymerase activity, DNA-directed DNA polymerase activity, single-strand break-containing DNA binding activity								AA		AA
AN6122	Possible pseudogene								AA		AA
AN6137	Ortholog of A. fumigatus Af293 : Afu2g08640, A. niger CBS 513.88 : An12g03990, Aspergillus wentii : Aspwe1_0176126, Aspergillus sydowii : Aspsy1_0058040 and Aspergillus terreus NIH2624 : ATET_09699								AA
AN6203	Ortholog of A. fumigatus Af293 : Afu2g11860, A. oryzae RIB40 : AO090026000457, Aspergillus tubingensis : Asptu1_0039119 and Aspergillus brasiliensis : Aspbr1_0038813								AA		AA
AN6285	Ortholog of A. fumigatus Af293 : Afu2g12420, A. niger CBS 513.88 : An02g04555, Aspergillus wentii : Aspwe1_0661381 and Aspergillus sydowii : Aspsy1_0089680								AA
AN6319	Ortholog of A. nidulans FGSC A4 : AN0638, A. fumigatus Af293 : Afu1g16870, A. oryzae RIB40 : AO090005000988, Aspergillus wentii : Aspwe1_0038696 and Aspergillus sydowii : Aspsy1_0129541, Aspsy1_0995740							down	AA		AA
AN6337	Ortholog(s) have intracellular localization								AA		AA
AN6350	Ortholog of A. fumigatus Af293 : Afu2g14170, A. oryzae RIB40 : AO090023000135, Aspergillus versicolor : Aspve1_0028328, Aspergillus fumigatus A1163 : AFUB_029790 and Aspergillus sydowii : Aspsy1_0089798							down	AA
AN6367	Has domain(s) with predicted phosphatidylinositol phosphate kinase activity and role in phosphatidylinositol metabolic process							down	AA		AA
AN6389	Ortholog of A. fumigatus Af293 : Afu1g03300, Afu6g10800, A. niger CBS 513.88 : An11g00440, A. oryzae RIB40 : AO090023000186, Aspergillus wentii : Aspwe1_0039443 and Aspergillus sydowii : Aspsy1_0058314							down	AA
AN6397	Has domain(s) with predicted ATP binding, nucleoside-triphosphatase activity, nucleotide binding activity and role in mitochondrial respiratory chain complex III assembly								AA		AA
AN6403	Ortholog of Aspergillus clavatus NRRL 1 : ACLA_055850 and Aspergillus aculeatus ATCC16872 : Aacu16872_061969							up	AA		AA
AN6406	Protein of unknown function								AA		AA
AN6420	Ortholog of A. fumigatus Af293 : Afu2g01100, A. niger CBS 513.88 : An09g04970, A. oryzae RIB40 : AO090005001149, Aspergillus wentii : Aspwe1_0033340 and Aspergillus sydowii : Aspsy1_0178541								AA
AN6436	Has domain(s) with predicted ATP binding, ATPase activity, ATPase-coupled transmembrane transporter activity, nucleoside-triphosphatase activity, nucleotide binding activity and role in transmembrane transport								AA
AN6439	Ortholog(s) have intracellular localization								AA
AN6454	Has domain(s) with predicted transmembrane transporter activity, role in transmembrane transport and integral component of membrane localization								AA
AN6457	Has domain(s) with predicted peroxidase activity							down	AA		AA
AN6462	Has domain(s) with predicted hydrolase activity and role in metabolic process							down	AA		AA
AN6484	Has domain(s) with predicted oxidoreductase activity and role in oxidation-reduction process								AA		AA
AN6537	Ortholog of A. fumigatus Af293 : Afu6g04705, A. oryzae RIB40 : AO090701000069, Aspergillus wentii : Aspwe1_0168393, Aspergillus sydowii : Aspsy1_0051755 and Aspergillus terreus NIH2624 : ATET_06977								AA		AA
AN6571	Ortholog(s) have alpha-1,2-mannosyltransferase activity, role in mannan biosynthetic process, protein glycosylation, protein mannosylation and Golgi apparatus localization								AA		AA
AN6608	Has domain(s) with predicted role in regulation of transcription by RNA polymerase II								AA		AA
AN6634	Ortholog of A. fumigatus Af293 : Afu6g03780, A. niger CBS 513.88 : An03g03510, A. oryzae RIB40 : AO090701000171, Aspergillus wentii : Aspwe1_0048626 and Aspergillus sydowii : Aspsy1_0157274								AA		AA
AN6742	Has domain(s) with predicted FAD binding, carboxy-lyase activity, oxidoreductase activity and role in metabolic process								AA
AN6750	Has domain(s) with predicted FAD binding, oxidoreductase activity and role in metabolic process								AA		AA
AN6794	Ortholog of Aspergillus glaucus : Aspgl1_0053875 and Neosartorya fischeri NRRL 181 : NFIA_007460							down	AA
AN6795	Ortholog(s) have extracellular region localization								AA		AA
AN6850	Ortholog of A. niger CBS 513.88 : An14g06230, Neosartorya fischeri NRRL 181 : NFIA_074110, Aspergillus wentii : Aspwe1_0170832 and Aspergillus versicolor : Aspve1_0211329							down	AA		AA
AN6862	Ortholog of A. niger CBS 513.88 : An03g01640, Neosartorya fischeri NRRL 181 : NFIA_074040, Aspergillus wentii : Aspwe1_0170839 and Aspergillus versicolor : Aspve1_0035273							down	AA		AA
AN6872	Ortholog of Aspergillus flavus NRRL 3357 : AFL2T_11606								AA		AA
AN6897	Ortholog(s) have GTPase activity, role in mitochondrial fusion and integral component of mitochondrial outer membrane, mitochondrial inner membrane, mitochondrial outer membrane localization								AA
AN6899	Ortholog of A. niger CBS 513.88 : An14g04910, A. oryzae RIB40 : AO090120000492, Aspergillus wentii : Aspwe1_0170883, Aspergillus sydowii : Aspsy1_0040365 and Aspergillus terreus NIH2624 : ATET_06164								AA
AN6914	Has domain(s) with predicted calcium ion binding activity								AA
AN6961	Putative NRPS-like enzyme; predicted secondary metabolism gene cluster member; coregulated with AN6962								AA		AA
AN6962	Ortholog of the non-ribosomal peptide synthetase (NRPS) of A. fumigatus, nrps14/Afu8g00540; predicted secondary metabolism gene cluster member; coregulated with AN6961								AA		AA
AN6992	Ortholog(s) have dolichyl-phosphate beta-D-mannosyltransferase activity and role in dolichol-linked oligosaccharide biosynthetic process, fungal-type cell wall biogenesis, protein N-linked glycosylation, protein O-linked glycosylation								AA		AA
AN6995	Protein of unknown function							down	AA		AA
AN7003	Ortholog(s) have cell surface, cytosolic large ribosomal subunit localization								AA
AN7020	Protein of unknown function								AA		AA
AN7025	Ortholog of A. fumigatus Af293 : Afu4g04220, A. oryzae RIB40 : AO090206000072, Aspergillus wentii : Aspwe1_0114911, Aspergillus sydowii : Aspsy1_0060635 and Aspergillus terreus NIH2624 : ATET_10114								AA
AN7034	Putative 3'-5' bisphosphate nucleotidase with a predicted role in cysteine metabolism								AA		AA
AN7038	Ortholog of A. fumigatus Af293 : Afu4g04090, A. niger CBS 513.88 : An14g00760, A. oryzae RIB40 : AO090206000113, Aspergillus wentii : Aspwe1_0613920 and Aspergillus sydowii : Aspsy1_0158081								AA		AA
AN7039	Ortholog of A. fumigatus Af293 : Afu4g04080, A. niger CBS 513.88 : An14g00770, Neosartorya fischeri NRRL 181 : NFIA_029300, Aspergillus wentii : Aspwe1_0115799 and Aspergillus versicolor : Aspve1_0056350								AA		AA
AN7053	Ortholog of Aspergillus versicolor : Aspve1_0054863							down	AA		AA
AN7060	Ortholog(s) have monophenol monooxygenase activity							down	AA
AN7089	Ortholog of A. nidulans FGSC A4 : AN3992, AN8424, A. fumigatus Af293 : Afu7g05085, A. oryzae RIB40 : AO090005000321 and Neosartorya fischeri NRRL 181 : NFIA_026200								AA
AN7102	Ortholog of A. fumigatus Af293 : Afu4g03830, A. niger CBS 513.88 : An14g01068, A. oryzae RIB40 : AO090011000343, Aspergillus wentii : Aspwe1_0030332 and Aspergillus sydowii : Aspsy1_0060599							down	AA		AA
AN7186	Ortholog of A. fumigatus Af293 : Afu5g14180, A. niger CBS 513.88 : An14g05580, A. oryzae RIB40 : AO090001000217, Aspergillus wentii : Aspwe1_0179974 and Aspergillus sydowii : Aspsy1_0026595								AA		AA
AN7187	Has domain(s) with predicted oxidoreductase activity and role in oxidation-reduction process								AA		AA
AN7194	Has domain(s) with predicted oxidoreductase activity, zinc ion binding activity and role in oxidation-reduction process								AA		AA
AN7229	Transcript induced in response to calcium dichloride in a CrzA-dependent manner							down	AA		AA
AN7230	Putative cellobiose dehydrogenase								AA
AN7235	Has domain(s) with predicted oxidoreductase activity and role in carotenoid biosynthetic process, chlorophyll biosynthetic process, oxidation-reduction process, photosynthesis							down	AA		AA
AN7241	Ortholog of A. oryzae RIB40 : AO090038000118, Aspergillus flavus NRRL 3357 : AFL2T_08942, Aspergillus versicolor : Aspve1_0133568 and Aspergillus sydowii : Aspsy1_0718256								AA		AA
AN7255	Ortholog of A. oryzae RIB40 : AO090102000108, Aspergillus wentii : Aspwe1_0171112, Aspergillus versicolor : Aspve1_0038807 and Aspergillus niger ATCC 1015 : 194648-mRNA							down	AA
AN7273	Ortholog of A. fumigatus Af293 : Afu2g16990, A. oryzae RIB40 : AO090102000119, Aspergillus wentii : Aspwe1_0182487, Aspergillus sydowii : Aspsy1_0027170 and Aspergillus terreus NIH2624 : ATET_10043								AA		AA
AN7278	Putative glutamate decarboxylase with a predicted role in the 4-aminobutyrate (GABA) shunt								AA		AA
AN7293	Has domain(s) with predicted oxidoreductase activity and role in oxidation-reduction process								AA		AA
AN7299	Ortholog(s) have DNA binding activity and nucleus localization								AA		AA
AN7322	Ortholog of A. niger CBS 513.88 : An01g14820, Aspergillus wentii : Aspwe1_0093592, Aspergillus versicolor : Aspve1_0038743 and Aspergillus niger ATCC 1015 : 172038-mRNA								AA
AN7323	Covalently-bound cell wall protein; predicted glycosyl phosphatidylinositol (GPI)-anchor								AA
AN7331	Has domain(s) with predicted DNA binding, cyanate hydratase activity and role in cyanate metabolic process								AA		AA
AN7356	Ortholog of A. fumigatus Af293 : Afu2g16350, A. oryzae RIB40 : AO090102000229, Neosartorya fischeri NRRL 181 : NFIA_091620, Aspergillus wentii : Aspwe1_0182411 and Aspergillus versicolor : Aspve1_0038652								AA		AA
AN7379	Ortholog(s) have role in negative regulation of transcription by RNA polymerase II, regulation of nitrogen utilization								AA
AN7383	Ortholog of A. oryzae RIB40 : AO090010000377, Aspergillus flavus NRRL 3357 : AFL2T_11553, Aspergillus wentii : Aspwe1_0156782 and Aspergillus versicolor : Aspve1_0137812							down	AA		AA
AN7386	Ortholog of A. nidulans FGSC A4 : AN1127, A. fumigatus Af293 : Afu1g11740, A. niger CBS 513.88 : An02g03380, An08g03700 and A. oryzae RIB40 : AO090026000507								AA		AA
AN7392	Protein of unknown function								AA
AN7395	Ortholog of A. nidulans FGSC A4 : AN5639, AN2587, AN9444, A. fumigatus Af293 : Afu5g00840, A. niger CBS 513.88 : An03g01000 and A. oryzae RIB40 : AO090102000018							down	AA		AA
AN7397	Protein of unknown function							down	AA		AA
AN7431	Has domain(s) with predicted nucleic acid binding, zinc ion binding activity and nucleus localization							down	AA
AN7460	Ortholog of Aspergillus versicolor : Aspve1_0030998 and Aspergillus sydowii : Aspsy1_0203499								AA		AA
AN7461	Ortholog(s) have protein deacetylase activity and role in chromatin silencing at centromere, chromatin silencing at rDNA, chromatin silencing at telomere, histone H3-K9 deacetylation, phenotypic switching								AA		AA
AN7470	Ortholog of A. fumigatus Af293 : Afu2g05810, A. niger CBS 513.88 : An02g14540, A. oryzae RIB40 : AO090001000700, Neosartorya fischeri NRRL 181 : NFIA_082530 and Aspergillus wentii : Aspwe1_0120676								AA		AA
AN7521	Ortholog of A. fumigatus Af293 : Afu3g09230, A. niger CBS 513.88 : An12g05590, A. oryzae RIB40 : AO090023000559, Aspergillus wentii : Aspwe1_0110954 and Aspergillus sydowii : Aspsy1_1178405								AA		AA
AN7524	Has domain(s) with predicted hydrolase activity and role in metabolic process								AA		AA
AN7536	Ortholog of A. nidulans FGSC A4 : AN2922, AN1515, A. niger CBS 513.88 : An12g10030, A. oryzae RIB40 : AO090701000305, AO090102000038, AO090124000043 and Aspergillus wentii : Aspwe1_0030521							down	AA
AN7574	Protein of unknown function								AA
AN7587	Ortholog of A. fumigatus Af293 : Afu2g15180, A. niger CBS 513.88 : An09g03440, A. oryzae RIB40 : AO090012000301, Aspergillus wentii : Aspwe1_0054076 and Aspergillus sydowii : Aspsy1_0058595								AA
AN7594	DUF636 domain-containing protein; intracellular, menadione stress-induced protein; protein levels decrease in response to farnesol								AA
AN7595	Ortholog of A. fumigatus Af293 : Afu2g15270, A. niger CBS 513.88 : An09g03530, Neosartorya fischeri NRRL 181 : NFIA_090510 and Aspergillus versicolor : Aspve1_0030808								AA		AA
AN7596	Has domain(s) with predicted DNA-binding transcription factor activity, RNA polymerase II-specific, zinc ion binding activity, role in regulation of transcription, DNA-templated and nucleus localization							down	AA		AA
AN7632	Putative dehydrogenase with a predicted role in two-carbon compound metabolism								AA		AA
AN7636	Has domain(s) with predicted oxidoreductase activity, transferase activity, transferring acyl groups other than amino-acyl groups, zinc ion binding activity and role in oxidation-reduction process								AA		AA
AN7708	Ortholog(s) have alditol:NADP+ 1-oxidoreductase activity, aldo-keto reductase (NADP) activity, role in D-xylose catabolic process, arabinose catabolic process, cellular response to oxidative stress and intracellular localization								AA		AA
AN7732	Ortholog of A. fumigatus Af293 : Afu5g08070, A. niger CBS 513.88 : An03g04260, A. oryzae RIB40 : AO090701000723, Aspergillus wentii : Aspwe1_0272371 and Aspergillus sydowii : Aspsy1_0153174								AA
AN7744	Ortholog of A. fumigatus Af293 : Afu5g07870, A. oryzae RIB40 : AO090701000920, Aspergillus wentii : Aspwe1_0023621 and Aspergillus sydowii : Aspsy1_0152961								AA		AA
AN7765	Has domain(s) with predicted DNA binding activity							down	AA
AN7771	Ortholog of A. fumigatus Af293 : Afu5g07480, A. niger CBS 513.88 : An15g02850, A. oryzae RIB40 : AO090701000657, Aspergillus wentii : Aspwe1_0035055 and Aspergillus sydowii : Aspsy1_0046323								AA		AA
AN7779	Has domain(s) with predicted role in transmembrane transport and integral component of membrane localization								AA		AA
AN7781	Putative alpha-L-arabinofuranosidase							down	AA		AA
AN7782	Ortholog of A. fumigatus Af293 : Afu5g14250, A. niger CBS 513.88 : An14g05590, A. oryzae RIB40 : AO090001000199, Aspergillus wentii : Aspwe1_0028859 and Aspergillus sydowii : Aspsy1_0046329								AA		AA
AN7785	Ortholog of A. nidulans FGSC A4 : AN5372, A. fumigatus Af293 : Afu5g07450, Afu6g14060 and A. niger CBS 513.88 : An08g08280, An15g02880, An12g10360								AA		AA
AN7789	Has domain(s) with predicted aminopeptidase activity, dipeptidyl-peptidase activity, hydrolase activity and role in metabolic process, proteolysis							down	AA		AA
AN7790	Has domain(s) with predicted role in transmembrane transport and integral component of membrane localization								AA		AA
AN7966	Putative pectin methyl esterase								AA		AA
AN7988	Protein of unknown function; transcript is induced by nitrate								AA		AA
AN7991	Protein of unknown function								AA		AA
AN8037	Protein of unknown function								AA		AA
AN8050	Ortholog of A. fumigatus Af293 : Afu5g02090, A. niger CBS 513.88 : An02g11190, A. oryzae RIB40 : AO090003001312, Neosartorya fischeri NRRL 181 : NFIA_040030 and Aspergillus wentii : Aspwe1_0061053								AA		AA
AN8059	Ortholog(s) have mitochondrion targeting sequence binding, protein transmembrane transporter activity and role in protein insertion into mitochondrial inner membrane								AA		AA
AN8115	Has domain(s) with predicted catalytic activity and role in nucleoside metabolic process							down	AA		AA
AN8124	Ortholog of A. oryzae RIB40 : AO090012001039, Aspergillus glaucus : Aspgl1_0152256, Aspergillus sydowii : Aspsy1_0211409 and Aspergillus terreus NIH2624 : ATET_09335								AA		AA
AN8125	Has domain(s) with predicted DNA binding, DNA-binding transcription factor activity, RNA polymerase II-specific, zinc ion binding activity and role in regulation of transcription, DNA-templated, transcription, DNA-templated								AA		AA
AN8143	Has domain(s) with predicted role in isoprenoid biosynthetic process								AA
AN8151	Protein of unknown function								AA
AN8177	Putative glucose responsive transcription factor								AA		AA
AN8178	Protein of unknown function								AA
AN8200	Ortholog of A. fumigatus Af293 : Afu5g03310, A. niger CBS 513.88 : An09g05630, A. oryzae RIB40 : AO090102000535, Aspergillus wentii : Aspwe1_0030105 and Aspergillus sydowii : Aspsy1_0136711								AA		AA
AN8203	Ortholog(s) have NAD+ synthase (glutamine-hydrolyzing) activity, glutaminase activity, role in NAD biosynthetic process and cytoplasm, nucleus localization								AA		AA
AN8212	Ortholog(s) have 5'-flap endonuclease activity, role in DNA-dependent DNA replication and Slx1-Slx4 complex localization								AA		AA
AN8219	Putative plasma membrane ATPase with a predicted role in energy metabolism								AA		AA
AN8231	Putative S-adenosylmethionine decarboxylase with a predicted role in arginine metabolism								AA
AN8267	Ortholog of A. fumigatus Af293 : Afu5g04155, A. oryzae RIB40 : AO090102000618, Aspergillus wentii : Aspwe1_0116105 and Aspergillus sydowii : Aspsy1_0061914								AA
AN8301	Protein of unknown function								AA		AA
AN8314	Has domain(s) with predicted hydrolase activity								AA
AN8337	Ortholog(s) have high-affinity zinc transmembrane transporter activity, zinc ion transmembrane transporter activity								AA		AA
AN8372	Protein of unknown function							down	AA		AA
AN8446	Has domain(s) with predicted oxidoreductase activity and role in oxidation-reduction process								AA		AA
AN8477	Putative beta-1,4-xylosidase							down	AA
AN8495	Ortholog of A. nidulans FGSC A4 : AN3479, AN3143, A. fumigatus Af293 : Afu3g01440, Afu3g13940, Afu4g03340, Afu5g07620 and A. niger CBS 513.88 : An13g02880, An09g04780								AA		AA
AN8496	Has domain(s) with predicted metal ion binding activity								AA		AA
AN8503	Ortholog of A. niger CBS 513.88 : An13g03080, Aspergillus wentii : Aspwe1_0177501, Aspergillus versicolor : Aspve1_0046851 and Aspergillus sydowii : Aspsy1_0159981								AA		AA
AN8549	Protein of unknown function							down	AA		AA
AN8556	Has domain(s) with predicted role in transmembrane transport and membrane localization								AA
AN8566	Has domain(s) with predicted catalytic activity, catechol 1,2-dioxygenase activity, ferric iron binding, iron ion binding and oxidoreductase activity, more								AA		AA
AN8583	Has domain(s) with predicted catalytic activity, coenzyme binding activity and role in cellular metabolic process							down	AA
AN8589	Protein of unknown function								AA		AA
AN8595	Has domain(s) with predicted role in transmembrane transport and integral component of membrane localization							down	AA		AA
AN8599	Ortholog of A. fumigatus Af293 : Afu6g01790, Neosartorya fischeri NRRL 181 : NFIA_047950, Aspergillus versicolor : Aspve1_0137840 and Aspergillus fumigatus A1163 : AFUB_096560							down	AA		AA
AN8603	Has domain(s) with predicted oxidoreductase activity and role in metabolic process								AA		AA
AN8614	Ortholog of A. niger CBS 513.88 : An14g07370, Aspergillus versicolor : Aspve1_0086394 and Aspergillus sydowii : Aspsy1_0060196								AA		AA
AN8626	Protein of unknown function								AA		AA
AN8628	Has domain(s) with predicted oxidoreductase activity, transferase activity, transferring acyl groups other than amino-acyl groups, zinc ion binding activity and role in oxidation-reduction process								AA		AA
AN8629	Ortholog of A. fumigatus Af293 : Afu6g00490, A. niger CBS 513.88 : An05g02230, A. oryzae RIB40 : AO090005000232, AO090011000420 and Neosartorya fischeri NRRL 181 : NFIA_047620								AA		AA
AN8664	Has domain(s) with predicted hydrolase activity								AA		AA
AN8708	Protein of unknown function							down	AA
AN8709	Putative aspartate transaminase with a predicted role in alanine and aspartate metabolism							down	AA
AN8713	Ortholog(s) have 3' overhang single-stranded DNA endodeoxyribonuclease activity								AA
AN8728	Ortholog of A. oryzae RIB40 : AO090012000831, Aspergillus brasiliensis : Aspbr1_0201195, Aspergillus glaucus : Aspgl1_0037582 and Aspergillus versicolor : Aspve1_0192004								AA		AA
AN8754	Putative asparagine synthase with a predicted role in asparagine metabolism								AA
AN8815	Putative isoflavone reductase family protein; intracellular, menadione stress-induced protein								AA		AA
AN8829	Ortholog of A. oryzae RIB40 : AO090009000665, Aspergillus wentii : Aspwe1_0054722, Aspergillus sydowii : Aspsy1_0117087 and Aspergillus terreus NIH2624 : ATET_02810, ATET_09435								AA		AA
AN8918	Putative transcription factor; predicted role in secondary metabolite production								AA		AA
AN8921	Has domain(s) with predicted 3-hydroxyacyl-CoA dehydrogenase activity, coenzyme binding, oxidoreductase activity, acting on the CH-OH group of donors, NAD or NADP as acceptor activity								AA		AA
AN8960	Protein of unknown function							down	AA		AA
AN8968	Putative isoflavone reductase; ortholog of A. fumigatus Afu1g12510								AA		AA
AN8973	Has domain(s) with predicted DNA-binding transcription factor activity, DNA-binding transcription factor activity, RNA polymerase II-specific, zinc ion binding activity and role in regulation of transcription, DNA-templated								AA		AA
AN9026	Has domain(s) with predicted DNA binding, DNA-binding transcription factor activity, RNA polymerase II-specific, zinc ion binding activity and role in regulation of transcription, DNA-templated, transcription, DNA-templated							down	AA
AN9031	Has domain(s) with predicted catalytic activity and role in metabolic process								AA		AA
AN9047	Has domain(s) with predicted DNA binding, DNA-binding transcription factor activity, RNA polymerase II-specific, zinc ion binding activity and role in regulation of transcription, DNA-templated, transcription, DNA-templated								AA		AA
AN9074	Ortholog of A. fumigatus Af293 : Afu7g02440, A. oryzae RIB40 : AO090038000622, Aspergillus wentii : Aspwe1_0052578, Aspergillus sydowii : Aspsy1_0093793 and Aspergillus terreus NIH2624 : ATET_01872								AA		A-B	A-B
AN9106	Ortholog(s) have triglyceride lipase activity, role in triglyceride catabolic process and mitochondrion localization								AA		AA
AN9140	Putative MFS-type amino acid transporter; transcript repressed by nitrogen limitation								AA		AA
AN9168	Ortholog(s) have solute:proton symporter activity, role in glycerol transport, transmembrane transport and plasma membrane localization								AA		AA
AN9169	Has domain(s) with predicted transmembrane transporter activity, role in transmembrane transport and integral component of membrane, membrane localization								AA
AN9173	Sugar transporter; transcriptionally induced by growth on xylose								AA		AA
AN9191	Ortholog(s) have intracellular localization								AA
AN9192	Ortholog of A. fumigatus Af293 : Afu3g03910, A. niger CBS 513.88 : An13g01790, A. oryzae RIB40 : AO090038000138, Neosartorya fischeri NRRL 181 : NFIA_006190 and Aspergillus kawachii : Aspka1_0177086								AA
AN9226	Putative nonribosomal peptide synthase (NRPS); coregulated member of a dimethyl-allyl-tryptophan synthase (DMATS) type aromatic prenyltransferase- and NRPS-containing gene cluster								AA		AA
AN9283	Possible pseudogene							up	AA		A-B	A-B
AN9322	Ortholog of A. fumigatus Af293 : Afu4g03450, A. niger CBS 513.88 : An14g02560, An01g11380, A. oryzae RIB40 : AO090011000213, Aspergillus wentii : Aspwe1_0115377 and Aspergillus sydowii : Aspsy1_0073421								AA
AN9337	Protein of unknown function								AA		AA
AN9338	Ortholog of A. nidulans FGSC A4 : AN7059, A. niger CBS 513.88 : An12g03220, An01g01400, An12g02100, An09g02230 and A. oryzae RIB40 : AO090138000084								AA		AA
AN9350	Protein of unknown function								AA		AA
AN9364	Protein of unknown function							down	AA		AA
AN9368	Protein of unknown function								AA		AA
AN9375	Has domain(s) with predicted oxidoreductase activity and role in oxidation-reduction process								AA		AA
AN9378	Has domain(s) with predicted oxidoreductase activity and role in metabolic process								AA		AA
AN9379	Protein of unknown function							down	AA		AA
AN9382	Has domain(s) with predicted role in transmembrane transport and integral component of membrane localization								AA		AA
AN9386	Ortholog of Aspergillus brasiliensis : Aspbr1_0139979, Aspergillus kawachii : Aspka1_0182863, Aspergillus wentii : Aspwe1_0051750 and Aspergillus versicolor : Aspve1_0057888								AA		AA
AN9401	Ortholog(s) have mitochondrion localization								AA		AA
AN9465	Ortholog(s) have structural constituent of ribosome activity, role in cytoplasmic translation and cytosolic large ribosomal subunit localization								AA
AN9468	Ortholog(s) have role in maturation of SSU-rRNA from tricistronic rRNA transcript (SSU-rRNA, 5.8S rRNA, LSU-rRNA)								AA
AN9528	Ortholog(s) have lipid transfer activity								AA		AA
AN9540	Ortholog of Aspergillus versicolor : Aspve1_0077893 and Aspergillus sydowii : Aspsy1_0027680								AA		AA
AN11096	Putative ribitol 2-dehydrogenase; palA-dependent expression independent of pH							down	A/B	A/B
AN0197	Has domain(s) with predicted DNA-binding transcription factor activity, RNA polymerase II-specific, zinc ion binding activity, role in regulation of transcription, DNA-templated and nucleus localization								A/B	A/B	AA
AN10533	Putative trehalose-6-phosphate synthase; ortholog of S. cerevisiae Tps3p; expression upregulated after exposure to farnesol								A/B	A/B	AA
AN10566	Ortholog of A. fumigatus Af293 : Afu2g03130, A. niger CBS 513.88 : An07g07550, Neosartorya fischeri NRRL 181 : NFIA_035480 and Aspergillus wentii : Aspwe1_0183505								A/B	A/B
AN10897	Has domain(s) with predicted DNA-binding transcription factor activity, RNA polymerase II-specific, zinc ion binding activity, role in regulation of transcription, DNA-templated and nucleus localization							down	A/B	A/B
AN11092	Has domain(s) with predicted role in transmembrane transport and integral component of membrane localization							down	A/B	A/B
AN11099	Has domain(s) with predicted DNA-binding transcription factor activity, RNA polymerase II-specific, zinc ion binding activity, role in regulation of transcription, DNA-templated and nucleus localization							down	A/B	A/B
AN11408	Protein of unknown function							down	A/B	A/B
AN11818	Has domain(s) with predicted DNA-binding transcription factor activity, RNA polymerase II-specific, zinc ion binding activity, role in regulation of transcription, DNA-templated and nucleus localization								A/B	A/B
AN12084	Ortholog of Aspergillus wentii : Aspwe1_0167532, Aspergillus versicolor : Aspve1_0052887, Aspergillus zonatus : Aspzo1_0014388 and Aspergillus sydowii : Aspsy1_1045764								A/B	A/B
AN1642	Putative vanillyl alcohol oxidase-related protein								A/B	A/B
AN1726	Putative 3-methyl-2-oxobutanoate dehydrogenase								A/B	A/B
AN1919	Protein of unknown function							down	A/B	A/B
AN2041	Ortholog of A. niger CBS 513.88 : An16g01460, An07g04410, An16g06600, An11g04970, An03g01890, A. oryzae RIB40 : AO090026000564 and Neosartorya fischeri NRRL 181 : NFIA_066540, NFIA_083780							down	A/B	A/B
AN2319	Ortholog of A. niger CBS 513.88 : An14g04210, A. oryzae RIB40 : AO090010000485, Aspergillus wentii : Aspwe1_0041701, Aspergillus sydowii : Aspsy1_0039595 and Aspergillus terreus NIH2624 : ATET_07606								A/B	A/B
AN2324	Has domain(s) with predicted DNA binding, DNA-binding transcription factor activity, DNA-binding transcription factor activity, RNA polymerase II-specific, zinc ion binding activity								A/B	A/B	AA
AN2533	Putative alpha-L-arabinofuranosidase								A/B	A/B
AN2663	Ortholog(s) have pantothenate transmembrane transporter activity, role in endocytosis, pantothenate transmembrane transport and plasma membrane localization								A/B	A/B
AN2780	Has domain(s) with predicted DNA binding, DNA-binding transcription factor activity, RNA polymerase II-specific, zinc ion binding activity and role in regulation of transcription, DNA-templated, transcription, DNA-templated								A/B	A/B
AN2798	Has domain(s) with predicted role in response to stress and integral component of membrane localization								A/B	A/B	AA
AN2860	Alcohol dehydrogenase; predicted role in fermentation								A/B	A/B
AN3515	Ortholog(s) have alpha-glucoside:proton symporter activity, maltose:proton symporter activity, trehalose transmembrane transporter activity								A/B	A/B
AN3984	Protein of unknown function								A/B	A/B
AN4126	Putative dehydrogenase with a predicted role in metabolism or penicillin biosynthesis							down	A/B	A/B
AN4289	Has domain(s) with predicted nucleic acid binding activity and role in DNA integration							down	A/B	A/B
AN4451	Protein of unknown function							down	A/B	A/B
AN5274	Has domain(s) with predicted DNA binding, DNA-binding transcription factor activity, RNA polymerase II-specific, zinc ion binding activity and role in regulation of transcription, DNA-templated, transcription, DNA-templated							down	A/B	A/B
AN5466	Protein of unknown function								A/B	A/B
AN5781	Putative 30 kilodalton heat shock protein; transcript levels increase during the unfolded-protein response (UPR); palA-dependent expression independent of pH								A/B	A/B
AN5948	Predicted glycosylphosphatidylinositol (GPI)-anchored protein								A/B	A/B
AN5993	Has domain(s) with predicted calcium ion binding activity								A/B	A/B
AN6151	Has domain(s) with predicted catalytic activity								A/B	A/B
AN6379	Protein of unknown function							down	A/B	A/B
AN6422	Has domain(s) with predicted hydrolase activity, hydrolase activity, acting on ester bonds activity and role in lipid metabolic process							down	A/B	A/B
AN6801	Ortholog of A. oryzae RIB40 : AO090001000089, Aspergillus flavus NRRL 3357 : AFL2T_07326, Aspergillus wentii : Aspwe1_0030608 and Aspergillus versicolor : Aspve1_0046605, Aspve1_0656082								A/B	A/B	A/B	A/B
AN6858	Has domain(s) with predicted DNA-binding transcription factor activity, RNA polymerase II-specific, zinc ion binding activity, role in regulation of transcription, DNA-templated and nucleus localization								A/B	A/B
AN7061	Putative transcription factor; predicted role in secondary metabolite production								A/B	A/B
AN7118	Has domain(s) with predicted DNA binding, DNA-binding transcription factor activity, RNA polymerase II-specific, nucleic acid binding, zinc ion binding activity								A/B	A/B
AN7225	Has domain(s) with predicted role in transmembrane transport and integral component of membrane localization							down	A/B	A/B
AN7324	Has domain(s) with predicted oxidoreductase activity and role in oxidation-reduction process								A/B	A/B
AN7605	Ortholog of A. fumigatus Af293 : Afu2g15530, A. oryzae RIB40 : AO090012000278, Aspergillus wentii : Aspwe1_0026836 and Aspergillus sydowii : Aspsy1_0032147							down	A/B	A/B
AN8043	Protein of unknown function								A/B	A/B
AN8355	Has domain(s) with predicted DNA binding, DNA-binding transcription factor activity, RNA polymerase II-specific, zinc ion binding activity and role in regulation of transcription, DNA-templated, transcription, DNA-templated								A/B	A/B
AN8467	Has domain(s) with predicted transmembrane transporter activity, role in transmembrane transport and integral component of membrane, membrane localization								A/B	A/B
AN8475	Ortholog of A. niger CBS 513.88 : An13g02250, An04g03090, A. oryzae RIB40 : AO090023000363, AO090012000682, Aspergillus wentii : Aspwe1_0053209 and Aspergillus versicolor : Aspve1_0155359							down	A/B	A/B
AN8476	Has domain(s) with predicted aminopeptidase activity, dipeptidyl-peptidase activity, hydrolase activity and role in metabolic process, proteolysis							down	A/B	A/B
AN8532	Predicted glycosylphosphatidylinositol (GPI)-anchored protein							down	A/B	A/B
AN8812	Has domain(s) with predicted ATP binding, ATPase activity, nucleoside-triphosphatase activity, nucleotide binding activity								A/B	A/B	AA
AN8987	Protein of unknown function							down	A/B	A/B
AN8989	Ortholog of A. fumigatus Af293 : Afu5g14830, A. oryzae RIB40 : AO090001000186, Neosartorya fischeri NRRL 181 : NFIA_041290 and Aspergillus wentii : Aspwe1_0039524, Aspwe1_0045369								A/B	A/B
AN9050	Zn(2)-Cys(6) binuclear domain-containing protein; predicted sequence-specific DNA binding transcription factor activity, zinc ion binding activity and a role in regulation of transcription; NeddH-associated protein							down	A/B	A/B
AN9523	Ortholog of A. fumigatus Af293 : Afu5g12040, A. niger CBS 513.88 : An18g02305, A. oryzae RIB40 : AO090120000321, Aspergillus wentii : Aspwe1_0445614 and Aspergillus sydowii : Aspsy1_0054923								A/B	A/B	AA
AN0213	Ortholog of A. fumigatus Af293 : Afu5g10950, A. niger CBS 513.88 : An14g02320, A. oryzae RIB40 : AO090010000435, Aspergillus wentii : Aspwe1_0440942 and Aspergillus sydowii : Aspsy1_0085799								AB	AB
AN0313	Has domain(s) with predicted hydrolase activity and role in metabolic process							down	AB	AB
AN10488	Has domain(s) with predicted carbohydrate binding, catalytic activity and role in carbohydrate catabolic process								AB	AB	AB	AB
AN10975	Ortholog of A. fumigatus Af293 : Afu5g06970, A. niger CBS 513.88 : An17g00170, A. oryzae RIB40 : AO090701000290, Aspergillus versicolor : Aspve1_0135244 and Aspergillus clavatus NRRL 1 : ACLA_010110								AB	AB
AN11489	Protein of unknown function; transcript is induced by nitrate							down	AB	AB
AN11541	Ortholog of A. oryzae RIB40 : AO090206000069, Neosartorya fischeri NRRL 181 : NFIA_029150, Aspergillus wentii : Aspwe1_0174603 and Aspergillus versicolor : Aspve1_0140562							down	AB	AB
AN11717	Protein of unknown function								AB	AB	AB	AB
AN11787	Protein of unknown function							down	AB	AB
AN12257	Protein of unknown function								AB	AB	A-B	A-B
AN1250	Ortholog of A. fumigatus Af293 : Afu1g10220, A. niger CBS 513.88 : An08g02090, Neosartorya fischeri NRRL 181 : NFIA_015430 and Aspergillus versicolor : Aspve1_0119420							down	AB	AB
AN1254	Ortholog(s) have role in ATP-dependent chromatin remodeling, chromatin remodeling, positive regulation of cellular response to phosphate starvation, positive regulation of chromatin silencing at centromere, regulation of nucleosome density								AB	AB
AN1415	Protein of unknown function								AB	AB
AN2250	Has domain(s) with predicted oxidoreductase activity and role in metabolic process								AB	AB
AN2502	Ortholog of A. fumigatus Af293 : Afu3g14130, A. oryzae RIB40 : AO090012000651, Aspergillus wentii : Aspwe1_0038072 and Aspergillus sydowii : Aspsy1_0056074							down	AB	AB
AN2704	Putative aryl-alcohol oxidase-related protein							down	AB	AB
AN3006	Ortholog of A. fumigatus Af293 : Afu4g13070, Neosartorya fischeri NRRL 181 : NFIA_103280, Aspergillus versicolor : Aspve1_0032308 and Aspergillus niger ATCC 1015 : 52618-mRNA							down	AB	AB
AN3481	Ortholog(s) have carbohydrate binding activity							down	AB	AB
AN3601	Has domain(s) with predicted catalytic activity and role in metabolic process							down	AB	AB	AA
AN3848	Ortholog of Aspergillus versicolor : Aspve1_0041880 and Aspergillus sydowii : Aspsy1_0131746							down	AB	AB
AN4041	Ortholog of A. fumigatus Af293 : Afu4g00280, A. oryzae RIB40 : AO090701000844, Neosartorya fischeri NRRL 181 : NFIA_045350 and Aspergillus versicolor : Aspve1_0043587							down	AB	AB
AN4329	Ortholog(s) have role in regulation of ergosterol biosynthetic process and fungal biofilm matrix localization							down	AB	AB
AN5258	Ortholog(s) have role in fumiquinazoline C biosynthetic process, secondary metabolite biosynthetic process and fungal-type cell wall localization								AB	AB	AB	AB
AN5262	Has domain(s) with predicted catalytic activity								AB	AB	AB	AB
AN5309	Putative cutinase with a predicted role in the hydrolysis of cutin								AB	AB	AA
AN5581	Ortholog of A. nidulans FGSC A4 : AN6527, A. fumigatus Af293 : Afu6g04900, Afu4g11477, A. niger CBS 513.88 : An14g03410, An04g05110 and A. oryzae RIB40 : AO090701000049, AO090003001075								AB	AB
AN5625	Ortholog of A. fumigatus Af293 : Afu4g11100, A. niger CBS 513.88 : An04g05590, A. oryzae RIB40 : AO090003001110, Aspergillus wentii : Aspwe1_0034056 and Aspergillus sydowii : Aspsy1_0043832							down	AB	AB
AN5633	Ortholog(s) have inorganic cation transmembrane transporter activity, solute:proton symporter activity								AB	AB	AB	AB
AN5653	Has domain(s) with predicted oxidoreductase activity and role in metabolic process								AB	AB	A-B	A-B
AN5855	Has domain(s) with predicted ATP adenylyltransferase activity								AB	AB
AN6241	Ortholog of A. fumigatus Af293 : Afu2g13160, A. niger CBS 513.88 : An02g01890, A. oryzae RIB40 : AO090026000276, Aspergillus wentii : Aspwe1_0663843 and Aspergillus sydowii : Aspsy1_0151393							down	AB	AB
AN6793	Ortholog(s) have hydrolase activity, acting on ester bonds activity, role in siderophore catabolic process and intracellular localization								AB	AB	AB	AB
AN6806	Ortholog of Aspergillus versicolor : Aspve1_0065917							down	AB	AB
AN6821	Ortholog of Aspergillus sydowii : Aspsy1_0091668							down	AB	AB
AN7026	Ortholog of A. fumigatus Af293 : Afu4g04230, A. niger CBS 513.88 : An14g00600, A. oryzae RIB40 : AO090206000070, Aspergillus wentii : Aspwe1_0030288 and Aspergillus sydowii : Aspsy1_0092867								AB	AB
AN7088	Has domain(s) with predicted transmembrane transporter activity, role in transmembrane transport and integral component of membrane localization								AB	AB	AB	AB
AN7129	Protein of unknown function							down	AB	AB
AN7172	Ortholog of A. niger CBS 513.88 : An14g02030, A. oryzae RIB40 : AO090011000125, Aspergillus wentii : Aspwe1_0030391, Aspergillus clavatus NRRL 1 : ACLA_055220 and Aspergillus niger ATCC 1015 : 41626-mRNA								AB	AB	AB	AB
AN7234	Protein of unknown function								AB	AB	A-B	A-B
AN7274	Ortholog(s) have role in fumiquinazoline C biosynthetic process, secondary metabolite biosynthetic process and fungal-type cell wall localization							down	AB	AB
AN7597	Ortholog(s) have oligopeptide transmembrane transporter activity, peptide transmembrane transporter activity, tetrapeptide transmembrane transporter activity								AB	AB
AN7713	Has domain(s) with predicted zinc ion binding activity								AB	AB	AB	AB
AN7717	Ortholog of A. fumigatus Af293 : Afu5g08190, A. oryzae RIB40 : AO090701000736, Aspergillus wentii : Aspwe1_0101496, Aspergillus sydowii : Aspsy1_0046260 and Aspergillus terreus NIH2624 : ATET_08307							down	AB	AB
AN7860	Ortholog of A. nidulans FGSC A4 : AN9318, A. fumigatus Af293 : Afu8g01270 and A. oryzae RIB40 : AO090010000599, AO090005000383, AO090011000082, AO090020000631								AB	AB
AN7861	Ortholog of Aspergillus versicolor : Aspve1_0076326 and Aspergillus sydowii : Aspsy1_1161572								AB	AB	AB	AB
AN9041	Putative 3-hydroxyacyl-CoA dehydrogenase with a predicted role in fatty acid metabolism							down	AB	AB
AN8553	Putative catalase with a predicted role in gluconic acid and gluconate metabolism								A-B	A-B	A-B	A-B
AN0015	Has domain(s) with predicted ATP binding, ATPase activity, ATPase-coupled transmembrane transporter activity, nucleoside-triphosphatase activity, nucleotide binding activity and role in transmembrane transport								A-B	A-B	A/B	A/B
AN0294	Ortholog of A. fumigatus Af293 : Afu1g03090, A. niger CBS 513.88 : An01g05320, A. oryzae RIB40 : AO090005000810, Aspergillus wentii : Aspwe1_0025587 and Aspergillus sydowii : Aspsy1_0040824							down	A-B	A-B	AA
AN0314	Putative aspartyl-tRNA synthetase with a predicted role in tRNA aminoacylation; expression upregulated after exposure to farnesol							down	A-B	A-B	A-B	A-B
AN0395	Putative inorganic diphosphatase with a predicted role in energy metabolism							down	A-B	A-B
AN0400	Ortholog of A. fumigatus Af293 : Afu4g09610, A. niger CBS 513.88 : An04g07500, A. oryzae RIB40 : AO090003001281, Neosartorya fischeri NRRL 181 : NFIA_106400 and Aspergillus wentii : Aspwe1_0022929								A-B	A-B	A-B	A-B
AN0709	Putative zinc-finger protein; expression upregulated after exposure to farnesol								A-B	A-B	AA
AN10057	Ortholog(s) have cholesterol binding activity, role in pathogenesis and cell surface, extracellular region, extracellular vesicle, yeast-form cell wall localization							down	A-B	A-B	AA
AN10168	Ortholog of A. fumigatus Af293 : Afu1g10430, A. niger CBS 513.88 : An08g02380, Neosartorya fischeri NRRL 181 : NFIA_015240, Aspergillus wentii : Aspwe1_0036585 and Aspergillus zonatus : Aspzo1_0163764							down	A-B	A-B
AN10197	Has domain(s) with predicted catalytic activity and role in coenzyme M biosynthetic process								A-B	A-B	A-B	A-B
AN10385	Protein of unknown function								A-B	A-B		BB
AN10419	Putative beta-1,4-endoglucanase							down	A-B	A-B	AA
AN10461	Protein of unknown function								A-B	A-B	A-B	A-B
AN10581	Ortholog of A. fumigatus Af293 : Afu5g08640, A. niger CBS 513.88 : An07g04900, Neosartorya fischeri NRRL 181 : NFIA_078640 and Aspergillus versicolor : Aspve1_0042746							down	A-B	A-B
AN10658	Has domain(s) with predicted transmembrane transporter activity, role in transmembrane transport and integral component of membrane, membrane localization							down	A-B	A-B	AA
AN10703	Has domain(s) with predicted oxidoreductase activity, zinc ion binding activity and role in oxidation-reduction process								A-B	A-B	AA
AN11001	Protein of unknown function								A-B	A-B	AA
AN11108	Has domain(s) with predicted hydrolase activity and role in metabolic process								A-B	A-B	A-B	A-B
AN11185	Has domain(s) with predicted DNA binding, DNA-binding transcription factor activity, DNA-binding transcription factor activity, RNA polymerase II-specific, zinc ion binding activity								A-B	A-B	AA
AN1127	Ortholog of A. nidulans FGSC A4 : AN7386, A. fumigatus Af293 : Afu1g11740, A. niger CBS 513.88 : An02g03380, An08g03700 and A. oryzae RIB40 : AO090026000507								A-B	A-B	AA
AN11313	Protein of unknown function							down	A-B	A-B	AA
AN11378	Ortholog of A. oryzae RIB40 : AO090001000134, Aspergillus glaucus : Aspgl1_0071332, Aspergillus wentii : Aspwe1_0171393 and Aspergillus versicolor : Aspve1_0087914							down	A-B	A-B	A-B	A-B
AN11533	Ortholog of A. fumigatus Af293 : Afu8g06974, A. niger CBS 513.88 : An01g03010, Neosartorya fischeri NRRL 181 : NFIA_099710 and Aspergillus kawachii : Aspka1_0178966								A-B	A-B	A-B	A-B
AN11705	Ortholog(s) have phosphatidic acid binding, phosphatidylinositol-3,5-bisphosphate binding, phosphatidylinositol-3-phosphate binding, sphingolipid binding activity								A-B	A-B	A-B	A-B
AN11789	Has domain(s) with predicted nucleic acid binding, zinc ion binding activity								A-B	A-B	AA
AN11882	Ortholog of A. fumigatus Af293 : Afu4g09340, A. oryzae RIB40 : AO090023000596, Neosartorya fischeri NRRL 181 : NFIA_106670, Aspergillus wentii : Aspwe1_0166843 and Aspergillus versicolor : Aspve1_0079667								A-B	A-B	AA
AN11949	Ortholog of A. niger CBS 513.88 : An12g01570, A. oryzae RIB40 : AO090020000669, Aspergillus glaucus : Aspgl1_0047358, Aspergillus kawachii : Aspka1_0182686 and Aspergillus wentii : Aspwe1_0055221							down	A-B	A-B	AA
AN12031	Protein of unknown function								A-B	A-B	AA
AN12035	Has domain(s) with predicted carbonate dehydratase activity, zinc ion binding activity							down	A-B	A-B	AA
AN12038	Protein of unknown function								A-B	A-B	A-B	A-B
AN12039	Has domain(s) with predicted integral component of membrane localization								A-B	A-B	A-B	A-B
AN12193	Has domain(s) with predicted hydrolase activity and role in metabolic process								A-B	A-B	AA
AN12216	Has domain(s) with predicted single-stranded DNA 5'-3' exodeoxyribonuclease activity and integral component of membrane localization								A-B	A-B	A-B	A-B
AN12377	Protein of unknown function								A-B	A-B	AA
AN12426	Has domain(s) with predicted integral component of membrane localization							down	A-B	A-B	AA
AN12458	Has domain(s) with predicted catalytic activity and role in metabolic process								A-B	A-B	AA
AN1279	Ortholog of A. fumigatus Af293 : Afu1g09880, A. niger CBS 513.88 : An08g01690, Neosartorya fischeri NRRL 181 : NFIA_015750 and Aspergillus versicolor : Aspve1_0068298							down	A-B	A-B	AB	AB
AN1651	Ortholog of A. nidulans FGSC A4 : AN8144, A. fumigatus Af293 : Afu5g14600, Afu6g00460, Afu6g13950, A. niger CBS 513.88 : An11g02490, An01g11420 and A. oryzae RIB40 : AO090001000384, AO090011000740								A-B	A-B	A-B	A-B
AN1767	Has domain(s) with predicted catalytic activity								A-B	A-B	AB	AB
AN1930	Ortholog of A. nidulans FGSC A4 : AN6413, AN6419, AN6946, AN5312, AN5664, AN8328, AN3241, AN10369, AN2386, AN1738, AN11159, AN8984, AN8951, AN1540, AN8971, AN9387, AN9266, AN9306, AN1317, AN10886, AN7232, AN7774, AN12202							down	A-B	A-B	AA
AN2042	Has domain(s) with predicted oxidoreductase activity and role in oxidation-reduction process								A-B	A-B	AB	AB
AN2221	Ortholog of A. niger CBS 513.88 : An13g02070, Aspergillus versicolor : Aspve1_0050620, Aspergillus niger ATCC 1015 : 44818-mRNA and Aspergillus sydowii : Aspsy1_0039729								A-B	A-B	A-B	A-B
AN2238	Has domain(s) with predicted unfolded protein binding activity and role in protein folding								A-B	A-B	AA
AN2242	Ortholog of A. fumigatus Af293 : Afu5g06790, A. oryzae RIB40 : AO090701000215, Neosartorya fischeri NRRL 181 : NFIA_036330 and Aspergillus wentii : Aspwe1_0034984							down	A-B	A-B	AA
AN2465	Has domain(s) with predicted transmembrane transporter activity, role in transmembrane transport and integral component of membrane, membrane localization							down	A-B	A-B
AN2613	Has domain(s) with predicted role in transmembrane transport and integral component of membrane localization							down	A-B	A-B	AA
AN2615	Has domain(s) with predicted DNA-binding transcription factor activity, RNA polymerase II-specific, zinc ion binding activity, role in regulation of transcription, DNA-templated and nucleus localization								A-B	A-B	A-B	A-B
AN2672	Has domain(s) with predicted DNA binding, DNA-binding transcription factor activity, RNA polymerase II-specific, zinc ion binding activity and role in regulation of transcription, DNA-templated, transcription, DNA-templated								A-B	A-B	AB	AB
AN3078	Protein of unknown function							down	A-B	A-B	AA
AN3211	Ortholog of A. fumigatus Af293 : Afu5g00600, A. niger CBS 513.88 : An14g02660, A. oryzae RIB40 : AO090009000028, Aspergillus wentii : Aspwe1_0156413 and Aspergillus sydowii : Aspsy1_0060470							down	A-B	A-B
AN3321	Has domain(s) with predicted aspartic-type endopeptidase activity and role in proteolysis								A-B	A-B	A-B	A-B
AN3434	Has domain(s) with predicted GTP binding, GTPase activity and role in intracellular protein transport, nucleocytoplasmic transport, protein transport, signal transduction, small GTPase mediated signal transduction								A-B	A-B	AB	AB
AN3474	Ortholog of A. oryzae RIB40 : AO090003001515, Aspergillus flavus NRRL 3357 : AFL2T_01577 and Aspergillus wentii : Aspwe1_0071034								A-B	A-B	A-B	A-B
AN3513	Ortholog of A. oryzae RIB40 : AO090026000319, Aspergillus flavus NRRL 3357 : AFL2T_06939, Aspergillus sydowii : Aspsy1_0097287 and Aspergillus terreus NIH2624 : ATET_09043								A-B	A-B	AB	AB
AN3523	Has domain(s) with predicted hydrolase activity								A-B	A-B	AA
AN3555	Small heat-shock protein; Hsp30p ortholog/paralog; expression upregulated after exposure to farnesol; palA-dependent expression independent of pH							down	A-B	A-B
AN3679	Has domain(s) with predicted oxidoreductase activity and role in metabolic process								A-B	A-B	A-B	A-B
AN3782	Has domain(s) with predicted FAD binding, oleate hydratase activity and role in fatty acid metabolic process								A-B	A-B	AA
AN3966	Protein of unknown function							down	A-B	A-B	A-B	A-B
AN3967	Protein of unknown function								A-B	A-B	A-B	A-B
AN3968	Protein of unknown function; transcript is induced by nitrate								A-B	A-B	A-B	A-B
AN3997	Ortholog(s) have role in secondary metabolite biosynthetic process							down	A-B	A-B
AN4104	Ortholog of A. fumigatus Af293 : Afu1g05860, A. niger CBS 513.88 : An18g03590, A. oryzae RIB40 : AO090009000354, Aspergillus wentii : Aspwe1_0026045 and Aspergillus sydowii : Aspsy1_0089091							down	A-B	A-B	AA
AN4105	Putative erythromycin esterase family protein								A-B	A-B	A-B	A-B
AN4133	Has domain(s) with predicted nucleic acid binding, zinc ion binding activity							down	A-B	A-B	AA
AN4154	Has domain(s) with predicted 1-alkyl-2-acetylglycerophosphocholine esterase activity and role in lipid catabolic process								A-B	A-B	AA
AN4155	Protein of unknown function							down	A-B	A-B	AA
AN4176	Ortholog of A. niger CBS 513.88 : An15g01870, An19g00110, An12g05110, A. oryzae RIB40 : AO090009000510 and Aspergillus wentii : Aspwe1_0033361, Aspwe1_0034402								A-B	A-B	A-B	A-B
AN4208	Ortholog(s) have ergosterol O-acyltransferase activity, sterol O-acyltransferase activity, role in ergosterol metabolic process and endoplasmic reticulum localization							down	A-B	A-B	AA
AN4352	Ortholog(s) have plasma membrane localization								A-B	A-B	AA
AN4704	Protein of unknown function							down	A-B	A-B	AA
AN4911	Ortholog of A. fumigatus Af293 : Afu3g10780, A. niger CBS 513.88 : An02g06450, Neosartorya fischeri NRRL 181 : NFIA_066470, Aspergillus wentii : Aspwe1_0362213 and Aspergillus versicolor : Aspve1_0127307							down	A-B	A-B	AA
AN5292	Ortholog of A. nidulans FGSC A4 : AN7640, A. fumigatus Af293 : Afu5g12490, Afu5g13780, A. niger CBS 513.88 : An14g06730 and A. oryzae RIB40 : AO090120000374, AO090020000661							down	A-B	A-B	AA
AN5325	Protein of unknown function								A-B	A-B	A-B	A-B
AN5326	Protein of unknown function; transcript repressed by nitrate							down	A-B	A-B	A-B	A-B
AN5411	Has domain(s) with predicted catalytic activity, metal ion binding, phosphoric diester hydrolase activity								A-B	A-B	AA
AN5947	Ortholog of A. niger CBS 513.88 : An11g05770, Neosartorya fischeri NRRL 181 : NFIA_007650, Aspergillus versicolor : Aspve1_0047552 and Aspergillus zonatus : Aspzo1_0020862							down	A-B	A-B	AA
AN6087	Ortholog(s) have pyridoxal phosphate binding activity, role in cellular iron ion homeostasis, pyridoxal phosphate transport and mitochondrion localization								A-B	A-B	AA
AN6105	Has domain(s) with predicted carbon-sulfur lyase activity and role in metabolic process								A-B	A-B	AA
AN6396	Has domain(s) with predicted DNA binding, DNA-binding transcription factor activity, RNA polymerase II-specific, zinc ion binding activity and role in regulation of transcription, DNA-templated, transcription, DNA-templated								A-B	A-B	A/B	A/B
AN6657	Ortholog of A. fumigatus Af293 : Afu6g03400, A. niger CBS 513.88 : An15g02040, Neosartorya fischeri NRRL 181 : NFIA_049930, Aspergillus wentii : Aspwe1_0168205 and Aspergillus versicolor : Aspve1_0086179							down	A-B	A-B	AA
AN6661	Protein of unknown function							down	A-B	A-B
AN6744	Ortholog of A. niger CBS 513.88 : An07g01410, Neosartorya fischeri NRRL 181 : NFIA_113290, Aspergillus wentii : Aspwe1_0023957 and Aspergillus versicolor : Aspve1_0056607							down	A-B	A-B
AN6811	Has domain(s) with predicted transmembrane transporter activity, role in transmembrane transport and integral component of membrane localization							down	A-B	A-B	AA
AN6996	Has domain(s) with predicted transferase activity, transferring phosphorus-containing groups activity								A-B	A-B	AA
AN7138	Has domain(s) with predicted role in transmembrane transport and integral component of membrane localization							down	A-B	A-B
AN7166	Ortholog of A. nidulans FGSC A4 : AN3215, AN8609, A. fumigatus Af293 : Afu3g14210, Afu4g03360, Afu4g12510 and A. niger CBS 513.88 : An09g04200, An14g01840								A-B	A-B	AB	AB
AN7298	Protein of unknown function; induced by carbon starvation-induced autophagy								A-B	A-B	AB	AB
AN7341	Ortholog of A. niger CBS 513.88 : An15g06860, A. oryzae RIB40 : AO090102000219, Neosartorya fischeri NRRL 181 : NFIA_091700, Aspergillus wentii : Aspwe1_0107255 and Aspergillus versicolor : Aspve1_0125535							down	A-B	A-B	AA
AN7738	Has domain(s) with predicted nutrient reservoir activity								A-B	A-B	AA
AN7796	Has domain(s) with predicted role in transmembrane transport and integral component of membrane localization								A-B	A-B	A-B	A-B
AN7892	Small heat-shock protein; molecular chaperone; expression upregulated after exposure to farnesol							down	A-B	A-B
AN8051	Ortholog of A. fumigatus Af293 : Afu5g02120, A. niger CBS 513.88 : An02g11160, A. oryzae RIB40 : AO090003001306, Aspergillus wentii : Aspwe1_0029924 and Aspergillus sydowii : Aspsy1_0156226								A-B	A-B	AB	AB
AN8122	Ortholog(s) have role in cellular response to drug, hexose transmembrane transport, pathogenesis								A-B	A-B	A-B	A-B
AN8328	Ortholog of A. nidulans FGSC A4 : AN6413, AN6419, AN6946, AN5312, AN5664, AN3241, AN10369, AN1930, AN2386, AN1738, AN11159, AN8984, AN8951, AN1540, AN8971, AN9387, AN9266, AN9306, AN1317, AN10886, AN7232, AN7774, AN12202							down	A-B	A-B	A-B	A-B
AN8329	Putative glucose oxidase-related protein							down	A-B	A-B	A-B	A-B
AN8335	Ortholog of A. oryzae RIB40 : AO090038000479, AO090009000246, Aspergillus flavus NRRL 3357 : AFL2T_10422, Aspergillus versicolor : Aspve1_0046662 and Aspergillus sydowii : Aspsy1_0136121								A-B	A-B	A-B	A-B
AN8336	Has domain(s) with predicted oxidoreductase activity, transferase activity, transferring acyl groups other than amino-acyl groups, zinc ion binding activity and role in oxidation-reduction process								A-B	A-B	A-B	A-B
AN8397	Has domain(s) with predicted oxidoreductase activity, acting on CH-OH group of donors activity and role in oxidation-reduction process								A-B	A-B	A-B	A-B
AN8398	Has domain(s) with predicted oxidoreductase activity and role in metabolic process								A-B	A-B	A-B	A-B
AN8399	Putative potassium-transporting ATPase with a predicted role in energy metabolism; transcript induced in response to calcium dichloride in a CrzA-dependent manner							down	A-B	A-B	AA
AN8469	Has domain(s) with predicted DNA-binding transcription factor activity, RNA polymerase II-specific, zinc ion binding activity, role in regulation of transcription, DNA-templated and nucleus localization								A-B	A-B	AA
AN8470	Has domain(s) with predicted FAD binding, oxidoreductase activity and role in metabolic process								A-B	A-B	AA
AN8473	Has domain(s) with predicted DNA binding, DNA-binding transcription factor activity, RNA polymerase II-specific, zinc ion binding activity and role in regulation of transcription, DNA-templated, transcription, DNA-templated							down	A-B	A-B	AA
AN8554	Has domain(s) with predicted oxidoreductase activity and role in oxidation-reduction process							up	A-B	A-B	A-B	A-B
AN8581	Putative laccase related protein								A-B	A-B	AA
AN8584	Ortholog of A. nidulans FGSC A4 : AN1204, A. niger CBS 513.88 : An12g06310, A. oryzae RIB40 : AO090020000093, Aspergillus wentii : Aspwe1_0058679, Aspwe1_0117796 and Aspergillus sydowii : Aspsy1_0038026							down	A-B	A-B
AN8587	Has domain(s) with predicted catalytic activity, oxidoreductase activity								A-B	A-B	A-B	A-B
AN8738	Protein of unknown function							down	A-B	A-B
AN8999	Putative chitinase; glycoside hydrolase family 18 (GH18) protein with a predicted role in chitin hydrolysis							down	A-B	A-B	A/B	A/B
AN9025	Has domain(s) with predicted DNA binding, DNA-binding transcription factor activity, RNA polymerase II-specific, nucleic acid binding, zinc ion binding activity							down	A-B	A-B
AN9027	Has domain(s) with predicted hydrolase activity							down	A-B	A-B	AB	AB
AN9241	Has domain(s) with predicted zinc ion binding activity and role in lipid metabolic process							down	A-B	A-B	A-B	A-B
AN9330	Ortholog(s) have lipase activity							down	A-B	A-B	AA
AN9343	Ortholog of Aspergillus glaucus : Aspgl1_0113732, Aspergillus versicolor : Aspve1_0132096, Aspergillus sydowii : Aspsy1_0901272 and Aspergillus carbonarius ITEM 5010 : Acar5010_157087								A-B	A-B	A-B	A-B
AN9389	Has domain(s) with predicted role in cell wall macromolecule catabolic process							down	A-B	A-B
AN2684	Putative oxidoreductase with a predicted role in sterol metabolism									BB	AB	AB
AN0677	Has domain(s) with predicted zinc ion binding activity									BB
AN1066	Ortholog(s) have role in mitochondrial respiratory chain complex IV assembly and integral component of mitochondrial inner membrane, mitochondrial membrane, mitochondrial respirasome, plasma membrane localization									BB	A-B	A-B
AN10898	Protein of unknown function							down		BB
AN11797	Protein of unknown function							down		BB
AN1647	Protein of unknown function									BB
AN1979	Ortholog of A. fumigatus Af293 : Afu4g10610, A. niger CBS 513.88 : An04g06070, Aspergillus wentii : Aspwe1_0022830, Aspergillus sydowii : Aspsy1_0053917 and Aspergillus terreus NIH2624 : ATET_04005							down		BB
AN4295	Ortholog(s) have role in cardiolipin metabolic process, cell-abiotic substrate adhesion, cristae formation, negative regulation of phosphatidylcholine biosynthetic process, phosphatidylethanolamine metabolic process, phospholipid transport							down		BB
AN4656	Possible pseudogene							down		BB
AN5213	Ortholog(s) have cell cortex of cell tip localization									BB
AN5621	Ortholog of A. fumigatus Af293 : Afu4g11130, A. niger CBS 513.88 : An04g05550, Aspergillus wentii : Aspwe1_0022788, Aspergillus sydowii : Aspsy1_0088403 and Aspergillus terreus NIH2624 : ATET_03967							down		BB
AN7654	Predicted glycosylphosphatidylinositol (GPI)-anchored protein							down		BB
AN2332	Putative succinate dehydrogenase with a predicted role in the TCA cycle										AA
AN11009	Putative mitochondrial pyruvate carboxylase										AA
AN0043	Has domain(s) with predicted transferase activity and role in biosynthetic process										AA
AN0517	Putative chitinase; glycoside hydrolase family 18 (GH18) protein with a predicted role in chitin hydrolysis							up			AA
AN0925	Has domain(s) with predicted phosphoric ester hydrolase activity										AA
AN10377	Ortholog of S. cerevisiae : PNS1, A. fumigatus Af293 : Afu3g12970, A. oryzae RIB40 : AO090012000835, Neosartorya fischeri NRRL 181 : NFIA_064350 and Aspergillus clavatus NRRL 1 : ACLA_040720										AA
AN10445	Ortholog(s) have plasma membrane localization										AA
AN10468	Ortholog(s) have role in cadmium ion transport, zinc ion transport										AA
AN10551	Ortholog(s) have tRNA binding activity										AA
AN10552	Ortholog of A. fumigatus Af293 : Afu4g07060, A. niger CBS 513.88 : An04g01460, A. oryzae RIB40 : AO090023000870, Aspergillus wentii : Aspwe1_0167183 and Aspergillus sydowii : Aspsy1_0094979										AA
AN11090	Has domain(s) with predicted oxidoreductase activity and role in oxidation-reduction process							down			AA
AN1115	Putative purine nucleosidase with a predicted role in nucleotide salvage pathways										AA
AN11820	Putative nonribosomal peptide sythetase (NRPS)-like enzyme										AA
AN1199	Ortholog(s) have role in cell-abiotic substrate adhesion										AA
AN12164	Protein of unknown function										AA
AN12306	Has domain(s) with predicted oxidoreductase activity and role in metabolic process										AA
AN1274	Ortholog(s) have alditol:NADP+ 1-oxidoreductase activity, aldo-keto reductase (NADP) activity, glycerol dehydrogenase [NAD(P)+] activity, mRNA binding, oxidoreductase activity										AA
AN1612	Ortholog(s) have inorganic phosphate transmembrane transporter activity, manganese ion transmembrane transporter activity, phosphate:proton symporter activity, selenite:proton symporter activity										AA
AN1613	Ortholog of A. niger CBS 513.88 : An04g04230, A. oryzae RIB40 : AO090023000625, Neosartorya fischeri NRRL 181 : NFIA_106970, Aspergillus wentii : Aspwe1_0145900 and Aspergillus versicolor : Aspve1_0037431							up			AA
AN1682	Ortholog of A. fumigatus Af293 : Afu4g08680, A. niger CBS 513.88 : An04g03500, A. oryzae RIB40 : AO090023000689, Aspergillus wentii : Aspwe1_0075630 and Aspergillus sydowii : Aspsy1_0038709										AA
AN1696	Has domain(s) with predicted transferase activity, transferring acyl groups other than amino-acyl groups activity										AA
AN1761	Ortholog(s) have ubiquitin-protein transferase activity and role in negative regulation of gluconeogenesis, proteasome-mediated ubiquitin-dependent protein catabolic process, ubiquitin-dependent protein catabolic process										AA
AN1798	Ortholog(s) have sterol esterase activity, role in cell wall mannoprotein biosynthetic process, sterol metabolic process and integral component of membrane, plasma membrane localization										AA
AN1803	Protein of unknown function										AA
AN2038	Predicted oxidoreductase; predicted secondary metabolism gene cluster member										AA
AN2119	Ortholog(s) have molecular function regulator activity, role in sphingolipid metabolic process and fungal-type vacuole membrane localization										AA
AN2361	Has domain(s) with predicted hydrolase activity, hydrolase activity, acting on acid halide bonds, in C-halide compounds activity and role in metabolic process										AA
AN2488	Ortholog of A. fumigatus Af293 : Afu3g00500, Afu4g03010, A. niger CBS 513.88 : An14g03080, A. oryzae RIB40 : AO090012000174 and Aspergillus wentii : Aspwe1_0176515, Aspwe1_0622364										AA
AN2501	Ortholog of A. oryzae RIB40 : AO090012000652, Aspergillus sydowii : Aspsy1_0087107, Aspergillus terreus NIH2624 : ATET_04017 and Aspergillus carbonarius ITEM 5010 : Acar5010_208778										AA
AN2834	Putative rhamnogalacturonan acetyl esterase; transcript is induced by nitrate										AA
AN3300	Has domain(s) with predicted DNA-binding transcription factor activity, RNA polymerase II-specific, zinc ion binding activity, role in regulation of transcription, DNA-templated and nucleus localization										AA
AN3472	Protein of unknown function										AA
AN4001	Has domain(s) with predicted DNA binding, zinc ion binding activity, role in transcription, DNA-templated and nucleus localization										AA
AN4076	Ortholog of A. fumigatus Af293 : Afu1g05540, Aspergillus wentii : Aspwe1_0037239, Aspergillus versicolor : Aspve1_0054320, Aspergillus zonatus : Aspzo1_0131207 and Aspergillus terreus NIH2624 : ATET_03076										AA
AN4180	Has domain(s) with predicted role in transmembrane transport and integral component of membrane localization							up			AA
AN4292	Possible pseudogene										AA
AN4382	Ortholog of A. fumigatus Af293 : Afu4g06710, A. niger CBS 513.88 : An04g01100, A. oryzae RIB40 : AO090023000914, Aspergillus wentii : Aspwe1_0034689 and Aspergillus sydowii : Aspsy1_0051225										AA
AN4908	Putative eukaryotic translation initiation factor subunit; PalA-dependent expression independent of pH							up			AA
AN4909	Protein of unknown function										AA
AN4973	Ortholog of A. fumigatus Af293 : Afu3g10150, A. niger CBS 513.88 : An16g03980, A. oryzae RIB40 : AO090003000550, Aspergillus wentii : Aspwe1_0049197 and Aspergillus sydowii : Aspsy1_0056460										AA
AN4983	Ortholog of A. fumigatus Af293 : Afu3g10050, A. niger CBS 513.88 : An16g03800, A. oryzae RIB40 : AO090003000538, Aspergillus wentii : Aspwe1_0168992 and Aspergillus sydowii : Aspsy1_0042898										AA
AN5281	Putative pyranose oxidase										AA
AN5427	Has domain(s) with predicted chromate transmembrane transporter activity and role in chromate transport										AA
AN5512	Has domain(s) with predicted phosphatase activity										AA
AN5989	Putative NAD dependent epimerase/dehydratase; intracellular; protein abundance decreased by menadione stress										AA
AN6590	Ortholog(s) have GTPase activator activity										AA
AN6604	Ortholog(s) have ATPase activity, tRNA binding activity, role in tRNA modification and Elongator holoenzyme complex, cytoplasm, nucleus localization										AA
AN6805	Has domain(s) with predicted transmembrane transporter activity, role in transmembrane transport and integral component of membrane, membrane localization										AA
AN7158	Has domain(s) with predicted hydrolase activity, hydrolase activity, acting on ester bonds activity and role in lipid metabolic process										AA
AN7208	SET domain protein; protein levels decrease in response to farnesol										AA
AN7286	Ortholog(s) have role in calcium ion import, negative regulation of cytosolic calcium ion concentration and cellular bud neck, plasma membrane localization										AA
AN7556	Protein of unknown function										AA
AN8172	Has domain(s) with predicted catalytic activity, pyridoxal phosphate binding activity and role in biosynthetic process										AA
AN8264	Ortholog of A. fumigatus Af293 : Afu5g04150, A. niger CBS 513.88 : An09g06550, A. oryzae RIB40 : AO090102000617, Aspergillus wentii : Aspwe1_0604276 and Aspergillus sydowii : Aspsy1_0161989							up			AA
AN9235	Has domain(s) with predicted catalytic activity and role in metabolic process										AA
AN9357	Has domain(s) with predicted oxidoreductase activity and role in metabolic process										AA
AN10547	Ortholog of A. fumigatus Af293 : Afu4g06220, A. oryzae RIB40 : AO090023000968, Neosartorya fischeri NRRL 181 : NFIA_109920 and Aspergillus clavatus NRRL 1 : ACLA_045540										A/B	A/B
AN0039	Ortholog of S. cerevisiae : YNL011C, A. fumigatus Af293 : Afu5g12650, A. niger CBS 513.88 : An14g06550, A. oryzae RIB40 : AO090120000392 and Aspergillus wentii : Aspwe1_0131485										AB	AB
AN10608	Has domain(s) with predicted hydrolase activity										AB	AB
AN10676	Ortholog(s) have UDP-galactose transmembrane transporter activity, role in UDP-galactose transmembrane import into Golgi lumen, UDP-galactose transmembrane transport and integral component of Golgi membrane localization										AB	AB
AN1179	Protein with a predicted role in negative regulation of gluconeogenesis and protein targeting to vacuole; protein is translationally repressed by the conserved upstream open reading frame (uORF) AN1179-uORF										AB	AB
AN1197	Has domain(s) with predicted carbohydrate binding, catalytic activity and role in carbohydrate metabolic process							up			AB	AB
AN1713	Ortholog(s) have calcium-independent phospholipase A2 activity, lysophosphatidic acid acyltransferase activity, sterol esterase activity, triglyceride lipase activity										AB	AB
AN2478	Ortholog of A. fumigatus Af293 : Afu6g00240, A. niger CBS 513.88 : An13g02290, A. oryzae RIB40 : AO090103000492 and Aspergillus wentii : Aspwe1_0179466										AB	AB
AN2942	Ortholog of A. nidulans FGSC A4 : AN10320, AN7130 and A. fumigatus Af293 : Afu3g15110, Afu4g08715							down			AB	AB
AN2815	Putative mannitol 2-dehydrogenase with a predicted role in mannose/mannitol, fructose, and sorbose/sorbitol metabolism										A-B	A-B
