# Supplementary material for: Genome-Wide Gene Expression Analyses of the AtfA/AtfB-Mediated Menadione Stress Response in Aspergillus nidulans
Source: Cells. 2023 Jan 31;12(3):463. doi: 10.3390/cells12030463 (PMC9913763; doi:10.3390/cells12030463)
Supplement: Supplementary file 1 [file cells-12-00463-s001.zip › Table S2 both AtfA-AtfB genes.xlsx]

## Sheet: Munka1
Table S2 List, characteristics and RPKM values of genes that showed both AtfA- and AtfB-dependence in mycelial and conidial samples.
GENE ID	Mean RPKM values (n = 3)								S.D. of RPKM values (n = 3)								Regulation			Sample
	Untreated cultures				MSB treated cultures				Untreated cultures				MSB treated cultures				Set	Interaction	Treatment
	wt	DatfA	DatfB	DatfA DatfB	wt	DatfA	DatfB	DatfA DatfB	wt	DatfA	DatfB	DatfA DatfB	wt	DatfA	DatfB	DatfA DatfB
AN5480	527.757	129.27	126.407	118.467	104.423	69.1202	185.566	59.9593	113.019	13.8552	56.5039	7.59459	77.225	7.61646	136.583	5.39888	set23	AB	untreated	mycelium
AN10847	357.893	49.6703	78.7391	41.0143	95.5614	51.9155	114.13	34.8384	61.7359	8.11364	28.0447	12.2349	56.9288	11.3562	78.231	7.47252	set23	AB	untreated	mycelium
AN5994	62.475	24.6103	26.4132	26.4153	24.6881	45.1899	28.6081	38.8276	12.7184	3.345	5.63033	2.57398	5.01835	3.76279	7.60789	5.06204	set23	AB	untreated	mycelium
AN6712	52.3975	7.17395	19.5895	11.145	21.0899	17.5001	39.7605	16.9682	7.43992	0.324912	3.06882	1.48144	8.32452	1.5716	17.0713	3.15206	set23	AB	untreated	mycelium
AN6796	26.8917	9.52534	11.1781	7.7469	142.044	192.443	83.5062	151.945	3.56502	1.07843	2.21135	1.93884	23.5449	28.8571	22.4762	18.6011	set23	AB	untreated	mycelium
AN3085	23.3699	6.74283	8.51642	8.96148	8.26249	4.88892	14.2794	4.74256	3.70873	0.867402	0.843012	0.816321	1.98356	0.57039	6.50535	0.880115	set23	AB	untreated	mycelium
AN8636	16.0039	3.28374	6.63738	6.21576	4.57046	2.01109	11.6595	2.0878	3.60179	0.480375	1.20089	1.29043	3.10605	0.33459	9.57828	0.273006	set23	AB	untreated	mycelium
AN3024	8.99597	2.12332	3.51432	2.6871	3.98462	2.78121	4.54459	3.05354	1.98806	0.574582	0.794944	0.359001	0.922731	0.418012	2.03069	0.387652	set23	AB	untreated	mycelium
AN1020	7.4444	2.38703	3.1182	2.13826	5.25827	3.79948	5.81119	4.14273	0.755752	0.330717	0.852139	0.5642	1.62051	0.620225	3.37576	0.874151	set23	AB	untreated	mycelium
AN8956	3.08399	1.03554	0.999998	0.965034	0.572515	0.383078	0.214158	0.554658	0.800105	0.0474163	0.556256	0.0764067	0.440691	0.114727	0.026816	0.212707	set23	AB	untreated	mycelium
AN6441	2.95579	0.6339	0.620626	0.477806	2.43657	1.94287	3.0528	1.38114	0.095972	0.194899	0.393084	0.185603	0.941895	0.694215	1.70067	0.151789	set23	AB	untreated	mycelium
AN8591	2.81137	0.295732	1.11359	0.972573	2.34091	1.66082	2.84882	1.55812	0.513203	0.103653	0.249354	0.346191	2.10959	0.775857	2.05744	0.726398	set23	AB	untreated	mycelium
AN11495	2.12969	0.138809	0.525201	0.29229	3.65697	1.44772	3.76814	0.80491	0.250214	0.122197	0.119936	0.141906	3.0633	0.330201	2.81857	0.348591	set23	AB	untreated	mycelium
AN9032	1.89667	0.282701	0.440167	0.739862	1.32329	2.78236	0.320739	1.81454	0.192432	0.030863	0.146213	0.222826	0.422107	0.18711	0.120648	0.455649	set23	AB	untreated	mycelium
AN7797	1.7835	0.588019	0.661019	0.329175	0.491722	0.409568	0.486536	0.453624	0.0577055	0.170812	0.0413542	0.0961304	0.19123	0.11468	0.0400391	0.117834	set23	AB	untreated	mycelium
AN10333	1.67182	0.722345	0.668702	0.715916	2.18804	1.08068	0.982041	0.710016	0.226178	0.0158273	0.0463279	0.185517	0.364776	0.183744	0.137033	0.0698135	set23	AB	untreated, MSB treated	mycelium
AN2286	3.43856	0.986815	3.80579	1.82903	2.44705	1.12536	1.18032	1.14287	0.930746	0.331286	0.608697	0.249491	1.93141	0.200783	0.313025	0.337439	set23	AB	MSB treated	mycelium
AN2549	333.45	328.662	394.904	141.922	30.0412	3.77263	60.1418	9.13725	11.3882	69.5926	17.6654	21.6248	2.5009	1.64199	7.27129	7.13651	set24	A/B	untreated	mycelium
AN0457	156.034	254.525	208.865	49.3021	29.746	15.5639	57.6259	18.123	11.0638	90.9735	25.8137	8.39846	0.531119	2.3039	6.27325	4.36084	set24	A/B	untreated	mycelium
AN2548	131.65	155.114	188.542	52.6801	11.8473	0.649859	30.7865	3.24835	7.11493	43.9315	14.7146	10.4506	1.00967	0.342513	5.01921	3.14464	set24	A/B	untreated	mycelium
AN2547	92.878	125.287	150.854	35.526	9.57141	0.714727	22.0051	2.06791	8.99265	44.6888	14.1034	9.22589	1.43548	0.477615	2.23278	1.8159	set24	A/B	untreated	mycelium
AN11374	82.3186	209.528	85.7008	34.9264	11.2298	12.4869	13.7457	11.5133	10.5516	10.8847	17.0471	3.49646	2.91531	2.24502	4.05968	1.82634	set24	A/B	untreated	mycelium
AN2546	52.1307	44.3606	74.8791	20.6955	6.32407	0.827901	13.3605	2.37576	4.6896	6.8939	6.93263	5.0746	1.14712	0.199387	2.17504	1.9834	set24	A/B	untreated	mycelium
AN5984	26.095	26.0186	28.6935	12.2618	16.5796	16.635	19.9181	16.8517	3.12229	0.944002	1.44008	1.16465	3.086	0.627735	2.19399	2.06641	set24	A/B	untreated	mycelium
AN2043	14.583	14.0235	14.2858	4.66899	2.34794	2.34524	3.41635	2.23221	1.44663	6.2854	4.06019	1.44936	0.202411	0.360841	0.516494	1.13818	set24	A/B	untreated	mycelium
AN6809	14.292	19.1015	25.8548	5.33927	4.44407	2.71438	6.74593	3.57924	1.18482	1.60558	2.48362	0.365711	0.316772	1.37723	0.649199	0.936153	set24	A/B	untreated	mycelium
AN2044	11.6465	6.88515	12.5577	2.88215	2.49241	1.76181	3.15001	1.59111	0.888794	3.55252	5.02035	0.751239	0.1688	0.285367	0.451925	0.537036	set24	A/B	untreated	mycelium
AN4198	10.0808	14.5906	10.8907	3.89042	1.21165	0.623193	1.69216	1.12119	1.55654	3.08525	1.1658	0.477322	0.559174	0.0944371	0.110225	0.495982	set24	A/B	untreated	mycelium
AN10815	8.70635	9.31425	10.5077	4.12686	10.1783	3.10135	15.0716	5.70534	0.871336	0.359666	0.922855	0.739967	1.59074	0.762476	0.574979	1.54682	set24	A/B	untreated	mycelium
AN3385	7.07518	7.70983	10.1774	2.50622	2.77421	2.12841	7.20077	2.33851	0.718258	0.429169	2.80085	0.809142	0.307805	0.335837	0.656732	0.567141	set24	A/B	untreated	mycelium
AN7264	6.98096	8.45419	6.46406	2.05819	1.43357	1.12179	1.48728	1.84358	1.40692	2.58447	0.983723	0.294125	0.289186	0.285891	0.118339	1.22345	set24	A/B	untreated	mycelium
AN10297	6.95173	3.43977	15.1631	0.695647	0.736295	0.186166	1.84549	0.237633	0.19087	0.484951	4.52279	0.198099	0.176373	0.0110378	0.259773	0.120628	set24	A/B	untreated	mycelium
AN3567	6.9456	7.22103	7.80591	3.21248	3.19315	0.510084	4.79897	1.45917	1.66927	0.355406	0.351494	0.0881944	0.295421	0.065081	0.787196	0.896375	set24	A/B	untreated	mycelium
AN3557	6.62815	6.21712	13.1372	2.20955	1.1675	0.375007	3.25512	1.45408	4.90593	3.15162	5.0339	0.719874	0.499879	0.27429	0.419881	0.570405	set24	A/B	untreated	mycelium
AN7058	5.13472	4.75459	9.8165	1.82228	1.66519	0.20929	3.75211	1.42022	3.10241	1.83091	5.26546	0.859487	0.779755	0.0220343	0.583693	0.45973	set24	A/B	untreated	mycelium
AN1088	4.3842	3.40997	4.08237	1.48547	0.477446	0.153932	0.753836	0.28279	0.701038	0.798145	0.628438	0.309957	0.136493	0.0922776	0.281733	0.112796	set24	A/B	untreated	mycelium
AN10242	3.92028	2.69428	5.27762	1.29507	1.43138	1.17887	1.5967	1.04524	0.826235	0.953263	1.08168	0.114797	0.630888	0.293744	0.268425	0.158902	set24	A/B	untreated	mycelium
AN2407	2.64785	3.04018	3.4152	0.754753	0.551531	0.338574	1.16098	0.536906	0.152385	0.945803	0.648356	0.167339	0.160842	0.0960208	0.243714	0.214986	set24	A/B	untreated	mycelium
AN2924	2.41713	2.41255	5.21233	0.855538	1.33826	0.684389	2.366	1.32144	0.392601	0.797796	2.17268	0.0818153	0.395753	0.307893	0.445047	0.341811	set24	A/B	untreated	mycelium
AN11093	2.39774	3.54779	5.10827	1.12917	4.1565	2.73236	5.47322	3.37141	0.151437	0.339878	0.51932	0.391904	0.258796	1.59227	0.924885	0.717099	set24	A/B	untreated	mycelium
AN3384	2.39062	3.52917	3.1173	1.03538	1.13415	1.49015	2.46799	0.764599	0.120621	0.719534	0.758534	0.213748	0.112319	0.0450267	0.469927	0.0551326	set24	A/B	untreated	mycelium
AN6478	2.13709	1.94315	3.42724	0.863395	1.13487	0.856182	2.40153	0.780825	0.180963	0.659021	0.933128	0.174817	0.608903	0.275821	0.568137	0.0545667	set24	A/B	untreated	mycelium
AN7222	4.04234	2.38702	23.5231	1.15747	0.748826	0.246098	2.0143	0.344066	1.01562	0.393809	10.8678	0.275061	0.338352	0.0915087	0.475321	0.0944167	set24	A/B	untreated	mycelium
AN0759	3.24611	44.1802	3.21079	1.25272	0.688901	0.890869	0.760404	0.573815	0.49335	9.63031	0.846095	0.473436	0.119433	0.20845	0.449529	0.497368	set24	A/B	untreated	mycelium
AN8147	1.93545	1.48043	3.59859	0.688382	2.05292	1.12801	2.06772	1.18249	0.54985	0.426683	0.50261	0.0811641	0.772256	0.562102	0.237185	0.319202	set24	A/B	untreated	mycelium
AN2657	1.40778	1.38034	1.59477	0.647368	0.872017	0.813649	1.15353	0.793991	0.361475	0.38402	0.112225	0.0984624	0.24631	0.131151	0.278045	0.155001	set24	A/B	untreated	mycelium
AN10505	1.07324	1.49574	1.29639	0.433006	0.647675	0.394949	1.53635	0.432902	0.088995	0.433287	0.49818	0.0402737	0.138206	0.224924	0.112665	0.0855535	set24	A/B	untreated	mycelium
AN7943	1.06823	1.03385	1.25521	0.492123	1.99142	1.49827	1.97582	1.88121	0.443933	0.152334	0.111577	0.114311	0.42141	0.299969	0.43956	0.137721	set24	A/B	untreated	mycelium
AN7868	0.947871	0.809265	4.61846	0.289995	1.01281	0.0933301	3.55764	0.59423	0.371311	0.485664	0.297959	0.169199	0.266532	0.0885617	1.04646	0.0368468	set24	A/B	untreated	mycelium
AN11210	0.941243	1.18152	0.990619	0.418154	0.475943	0.212153	0.485421	0.407083	0.0493091	0.109107	0.311349	0.197622	0.310002	0.0522695	0.161721	0.32347	set24	A/B	untreated	mycelium
AN8400	0.777017	1.68313	0.872945	0.342414	0.946481	1.21499	2.39238	1.3941	0.0897483	0.251359	0.15916	0.215111	0.376451	0.209499	0.509412	0.137629	set24	A/B	untreated	mycelium
AN7115	0.768835	1.6799	0.968015	0.288609	0.560741	0.809009	0.736892	0.445639	0.280906	0.214847	0.274248	0.0867904	0.119349	0.0804012	0.088171	0.05297	set24	A/B	untreated	mycelium
AN2832	0.660079	0.676735	1.08444	0.118138	0.138687	0.228633	0.26495	0.168025	0.307638	0.164382	0.343391	0.14867	0.155998	0.106969	0.0689237	0.102309	set24	A/B	untreated	mycelium
AN3388	0.61839	1.48369	0.774718	0.176255	0.286405	0.197807	0.85918	0.618091	0.184605	0.984926	0.206718	0.0806424	0.0500454	0.012277	0.0664036	0.429127	set24	A/B	untreated	mycelium
AN0525	0.487182	0.680389	0.651799	0.0822823	0.144318	0.315939	0.138327	0.0943145	0.292895	0.329949	0.218505	0.045261	0.125062	0.265004	0.0266786	0.0365754	set24	A/B	untreated	mycelium
AN9300	0.469133	0.529358	0.711862	0.133807	0.18491	0.0686969	0.220131	0.147727	0.0164576	0.252642	0.241284	0.0579162	0.0839903	0.0492797	0.105482	0.0590557	set24	A/B	untreated	mycelium
AN9183	0.320265	0.834803	0.336801	0.0571416	0.12916	0.0748628	0.285316	0.0939849	0.0579445	0.200214	0.0138471	0.0682361	0.0718356	0.0729521	0.0587444	0.0916413	set24	A/B	untreated	mycelium
AN2669	10.4803	6.81242	8.62463	8.31304	2.92668	2.46005	10.5875	1.19478	1.29269	1.9807	0.254373	3.76847	1.61042	0.841543	1.98673	0.115329	set24	A/B	MSB treated	mycelium
AN3976	11.3361	4.63373	5.54925	2.50206	11.4433	8.08259	5.99631	2.26986	2.27223	0.969291	0.889183	0.146777	1.16015	1.19312	0.697898	0.840925	set24	A/B	MSB treated	mycelium
AN6075	10.1852	40.3643	9.18997	4.97473	3.07361	3.82303	4.79866	1.4923	1.50661	5.7426	2.12452	0.355102	0.246241	0.0845868	1.27369	0.519097	set24	A/B	MSB treated	mycelium
AN6412	14.3863	9.70373	19.1734	10.8072	7.60343	6.05244	6.33048	2.84006	1.50661	0.507025	3.17767	1.55919	0.635641	1.57345	1.01283	1.34954	set24	A/B	MSB treated	mycelium
AN4299	468.537	57.8365	227.494	26.8921	192.929	27.6091	246.902	26.8291	46.286	8.06791	76.3426	3.74066	97.9033	5.14547	168.943	1.96656	set25	A-B1	untreated	mycelium
AN1814	10.1136	2.84362	9.16986	1.33867	1.6368	0.519051	1.14066	0.697237	2.49	0.169056	0.766637	0.456309	0.46008	0.364982	0.367754	0.134677	set25	A-B2	untreated	mycelium
AN7989	2.11751	0.530641	1.19905	0.18096	0.383106	0.0670798	0.511859	0.181791	0.316073	0.0278276	0.19895	0.0650157	0.253729	0.0597756	0.428152	0.0498274	set25	A-B2	untreated	mycelium
AN8138	53.2571	15.3573	30.6342	2.84264	18.7534	2.68605	50.6033	6.03963	4.9595	2.11082	1.10815	0.357011	4.79311	0.502324	10.9006	0.700428	set25	A-B2	untreated	mycelium
AN9373	10.7369	10.2946	10.9019	5.40127	3.45436	1.57686	6.54031	0.626537	1.02974	0.889267	0.855792	0.603415	0.36897	0.170553	1.19871	0.0923437	set25	A-B2	MSB treated	mycelium
AN9320	1.06755	1.01039	1.10836	0.758782	1.30874	1.54094	0.691123	0.201913	0.280652	0.163189	0.369357	0.0418047	0.047922	0.736249	0.256856	0.0496271	set25	A-B3	MSB treated	mycelium
AN0045	68.2794	3.52012	15.6365	3.3068	21.8149	5.48964	34.6814	4.97718	9.33616	0.215436	6.58868	0.318996	18.4011	0.883856	32.3494	0.544297	set25	A-B4	untreated	mycelium
AN0694	7.5931	0.525951	3.05529	1.14558	4.07887	2.55108	5.46708	2.51755	1.39508	0.169941	0.955117	0.265127	2.44724	1.39761	4.52845	1.07698	set25	A-B4	untreated	mycelium
AN10678	15.1217	0.381984	5.78284	0.459565	4.44834	0.622046	7.71646	0.513905	3.07782	0.33666	2.49559	0.166239	2.55264	0.174649	6.24138	0.0716583	set25	A-B4	untreated	mycelium
AN10699	1.40413	0.0341539	0.408265	0.07518	0.671847	0.0536175	0.997077	0.0827764	0.334926	0.0152249	0.122468	0.0744987	0.0622085	0.0160948	0.336156	0.0773641	set25	A-B4	untreated	mycelium
AN10977	26.4802	1.25544	7.98963	1.14098	31.146	1.23993	56.012	1.29159	2.73738	0.257726	2.29526	0.302212	24.8636	0.327709	50.9325	0.327716	set25	A-B4	untreated	mycelium
AN11016	1.17737	0.0260073	0.388038	0.0493179	0.336608	0.0878156	1.3088	0.0824762	0.356071	0.0450459	0.199078	0.0428409	0.236521	0.051038	1.46389	0.0635735	set25	A-B4	untreated	mycelium
AN11314	16.5574	0.15623	3.45219	0.36091	1.74197	0.329253	2.20599	0.382131	3.29877	0.0383601	1.96279	0.292175	1.28772	0.291243	1.31041	0.330956	set25	A-B4	untreated	mycelium
AN12085	18.2465	1.11209	6.28494	1.3283	13.3372	2.42695	23.1354	1.34819	3.36884	0.411072	1.31647	0.616985	12.2233	0.804618	12.684	0.076952	set25	A-B4	untreated	mycelium
AN12198	223.285	20.9169	76.7466	15.4121	76.5407	15.3384	129.307	13.0883	45.2912	1.60507	27.4104	0.95072	62.4699	1.07602	91.3045	0.790884	set25	A-B4	untreated	mycelium
AN1269	8.32707	0.303916	3.04089	0.427368	4.14214	1.00668	4.18942	0.806063	1.13981	0.141381	0.571946	0.0352455	0.788563	0.741425	1.95528	0.297025	set25	A-B4	untreated	mycelium
AN1625	3.21298	0.672173	1.42492	0.58898	1.43284	0.77734	1.32339	0.755226	0.431127	0.128291	0.358797	0.218096	0.759147	0.245646	0.798607	0.0809076	set25	A-B4	untreated	mycelium
AN2404	58.0691	0.156223	10.3318	0.144144	16.3186	0.185931	23.6025	0.233069	11.7366	0.0907357	4.20748	0.0562539	9.92546	0.0667146	21.0924	0.0598133	set25	A-B4	untreated	mycelium
AN2554	2.14027	0.127618	1.06715	0.0678233	0.384214	0.112638	0.70378	0.126668	0.162506	0.133597	0.115791	0.0505335	0.0620234	0.0649382	0.362161	0.0669794	set25	A-B4	untreated	mycelium
AN2565	3.05862	0.164284	1.08468	0.211183	0.116851	0.0994238	0.312431	0.107201	0.163563	0.162086	0.152975	0.0373582	0.105628	0.119844	0.0966105	0.0464218	set25	A-B4	untreated	mycelium
AN2822	2.64436	0.0496384	0.891755	0.174639	2.43543	0.38951	4.17058	0.262523	0.759681	0.0466519	0.179973	0.132111	1.83384	0.0651584	4.32369	0.125553	set25	A-B4	untreated	mycelium
AN3976	11.3361	4.63373	5.54925	2.50206	11.4433	8.08259	5.99631	2.26986	2.27223	0.969291	0.889183	0.146777	1.16015	1.19312	0.697898	0.840925	set25	A-B4	untreated	mycelium
AN5004	115.906	2.44657	51.3062	2.51586	30.4227	2.95762	60.1465	2.69903	18.2275	0.48331	18.4295	0.150256	14.5837	0.490814	38.0457	0.797262	set25	A-B4	untreated	mycelium
AN5056	622.059	0.518559	161.542	0.874134	199.707	0.679725	265.358	0.22878	63.0744	0.295618	70.5003	0.670422	116.5	0.487197	217.848	0.0688362	set25	A-B4	untreated	mycelium
AN5339	7.50795	0.82113	3.23522	1.40124	3.87053	1.59534	4.47914	1.55743	1.16476	0.343872	1.00809	0.284974	1.83068	0.125045	3.14334	0.289102	set25	A-B4	untreated	mycelium
AN5624	1.80905	0.0927419	0.762652	0.121743	0.765938	0.186465	1.83016	0.0999797	0.543993	0.0219011	0.109434	0.060876	0.504334	0.0431425	1.6118	0.0703701	set25	A-B4	untreated	mycelium
AN6274	15.3524	0.0611414	7.44799	0.108696	1.89619	0.219453	1.81423	0.0745065	3.66488	0.0703629	5.15188	0.0619891	1.36278	0.0888966	1.36491	0.0765979	set25	A-B4	untreated	mycelium
AN6301	13.2507	0.760863	4.7297	0.890876	2.47426	1.00715	3.71447	0.993433	1.73998	0.0851084	1.66558	0.265864	0.851392	0.28053	1.79302	0.174948	set25	A-B4	untreated	mycelium
AN6404	41.1162	0.439242	15.4235	4.31325	3.96577	0.0916199	8.71519	0.316125	12.6093	0.139648	1.43831	1.75848	4.20975	0.0624209	2.32199	0.182744	set25	A-B4	untreated	mycelium
AN6856	40.6097	0.349519	9.83251	0.301026	13.316	0.824176	38.658	0.46859	8.80651	0.153106	1.70676	0.112786	11.888	0.129164	39.5979	0.109372	set25	A-B4	untreated	mycelium
AN7558	8.33654	0.953611	2.70357	1.19088	2.94691	1.10141	4.38647	1.46552	1.49886	0.0208601	0.506267	0.226549	1.24537	0.133005	2.93642	0.303168	set25	A-B4	untreated	mycelium
AN7960	2.92589	0	0.509131	0	0.113577	0	0.0604549	0.0373499	1.08644	0	0.175731	0	0.0983697	0	0.104711	0.064692	set25	A-B4	untreated	mycelium
AN7992	122.332	4.09383	34.0011	3.22915	30.5614	1.45824	77.6095	2.35264	20.3043	1.59764	6.76705	1.38874	25.8841	0.580344	76.4486	1.5295	set25	A-B4	untreated	mycelium
AN8018	3.74271	0.466296	1.83202	0.683592	1.19816	0.736738	1.57387	0.578823	0.604447	0.062942	0.0916831	0.194748	0.718764	0.143435	0.852348	0.343947	set25	A-B4	untreated	mycelium
AN8640	8.8516	0	3.49289	0.0724314	0.515051	0.0766541	1.61981	0.108394	3.51174	0	1.66618	0.0649847	0.0939992	0.132769	1.62384	0.0151144	set25	A-B4	untreated	mycelium
AN8641	43.3362	0.113296	10.6383	0.208168	10.932	0.0619826	25.1264	0.10312	9.15036	0.120993	3.75988	0.0466521	10.4961	0.107357	25.4787	0.0453764	set25	A-B4	untreated	mycelium
AN8930	0.598336	0.00801946	0.209284	0	0.143882	0.0174308	0.307771	0.0187938	0.138076	0.0138901	0.0934649	0	0.0926755	0.0163231	0.133847	0.00262058	set25	A-B4	untreated	mycelium
AN8975	54.6132	0.463057	17.8293	0.788516	23.7068	1.4383	41.8415	2.05031	6.09192	0.251689	6.77147	0.187263	5.82859	0.55768	28.8448	0.236373	set25	A-B4	untreated	mycelium
AN9163	41.2186	0.280092	12.3842	0.422533	13.4131	0.714612	18.68	0.701372	9.89306	0.233518	2.63913	0.0802184	9.43424	0.163206	18.5034	0.167107	set25	A-B4	untreated	mycelium
AN0213	76.7058	50.6467	43.8578	57.9718	59.0147	52.4438	39.4577	58.8994	1.10831	2.85159	12.0408	9.90129	6.80838	9.89293	0.350843	14.0374	set23	AB	untreated	conidium
AN0313	110.918	75.6165	49.6651	41.8889	51.3382	34.4645	38.0587	29.2327	3.76044	2.21082	10.9575	3.61531	3.61952	12.475	12.5314	2.54711	set23	AB	untreated	conidium
AN0771	80.9037	54.7593	50.6728	44.1941	38.8128	37.93	33.6692	30.2709	16.4802	6.27066	15.4031	1.38893	2.34163	16.504	12.5031	3.68549	set23	AB	untreated	conidium
AN10305	52.2764	16.0848	21.3065	39.1022	2.52125	8.14539	6.89377	27.6637	22.0394	2.90592	15.7027	24.6048	0.690081	3.57871	6.11675	15.9612	set23	AB	untreated	conidium
AN10371	298.144	88.5282	108.863	135.366	94.4724	142.619	60.1854	144.639	91.9338	17.2915	20.3929	23.0518	7.45129	27.3194	22.0053	28.0538	set23	AB	untreated	conidium
AN10576	26.2857	8.26039	14.4245	12.0188	40.0269	34.7841	22.4782	31.3918	5.44377	4.43278	3.76607	2.41373	1.21754	24.8269	5.3434	10.276	set23	AB	untreated	conidium
AN10975	109.247	87.5259	67.3883	79.1155	61.0386	73.8059	47.5316	73.7247	14.3658	10.1344	10.5773	5.02216	6.72789	1.14428	8.34234	5.77434	set23	AB	untreated	conidium
AN11192	1.18361	0.438799	0.553711	0.4432	0.650332	0.607406	0.795093	0.861207	0.273557	0.287305	0.245799	0.133058	0.122196	0.199012	0.0365617	0.105399	set23	AB	untreated	conidium
AN11489	5678.14	3947.14	2806.02	4624.56	2271.51	2643	1837.45	3531.46	2250.33	1360.86	1285.66	2082.72	656.319	1069.85	561.257	1143.85	set23	AB	untreated	conidium
AN11541	34.2769	7.34708	12.7154	17.8936	10.2769	14.6462	10.6539	30.9135	11.7901	0.86647	4.28007	5.35553	1.13251	9.98156	2.0978	14.9601	set23	AB	untreated	conidium
AN11787	6826.42	3954.44	2468.71	4414.38	2364.2	2982.9	1824.44	3684.13	2585.38	962.512	999.303	1187.82	218.22	818.096	351.726	528.416	set23	AB	untreated	conidium
AN11880	5.39762	4.18698	3.41698	3.01859	3.83948	2.5521	2.74026	2.54575	0.593957	3.21914	0.245018	0.380918	0.518988	0.484313	0.353232	0.249744	set23	AB	untreated	conidium
AN11931	81.0817	17.5616	27.5311	23.9134	27.7842	31.3323	21.2999	31.1242	25.8588	2.14436	9.91069	3.95568	5.72147	13.3629	3.55706	6.83579	set23	AB	untreated	conidium
AN1250	158.893	133.464	57.2163	72.9717	40.2469	47.3957	28.305	57.365	30.4898	48.644	13.5831	12.5637	5.68888	4.30637	2.7896	3.69114	set23	AB	untreated	conidium
AN1254	41.6349	28.2888	23.4097	35.545	42.2573	37.758	26.2715	36.0392	5.09363	5.71742	4.59568	3.42903	5.0411	4.24721	1.77334	0.611503	set23	AB	untreated	conidium
AN1415	44.5709	30.2655	20.3873	39.8396	28.6706	20.8341	22.2351	23.6927	2.34592	15.3009	4.82683	3.72552	3.82519	3.79311	1.88962	6.34509	set23	AB	untreated	conidium
AN2250	2.48073	0.553486	1.08109	1.51053	1.06609	1.1532	1.4946	2.08281	0.661952	0.295901	0.472941	0.21568	0.225174	0.564961	0.557752	1.33944	set23	AB	untreated	conidium
AN2359	5.36627	3.47024	3.09629	3.94954	1.20016	2.57568	2.1936	3.85833	2.73849	0.864922	1.85021	1.38947	0.126608	0.304573	0.307969	0.938349	set23	AB	untreated	conidium
AN2502	30.6644	20.5867	19.2881	22.1382	15.8801	26.6344	18.1224	25.3947	11.3628	3.29329	6.64852	4.51764	3.65784	7.26381	4.02209	9.29008	set23	AB	untreated	conidium
AN2583	17.546	3.341	5.87686	5.85146	8.1848	3.15538	4.89834	3.76062	7.41466	0.405175	1.00776	1.48542	3.55398	0.955358	0.422036	1.46758	set23	AB	untreated	conidium
AN2704	4.68997	1.37716	1.90413	2.93582	0.918869	0.909306	1.09895	2.15567	2.21226	0.0886098	1.20829	0.173339	0.0853259	0.539924	0.213347	0.515164	set23	AB	untreated	conidium
AN3006	8.55037	5.36743	5.24089	4.69411	4.06642	4.00377	4.25385	3.29433	0.896288	0.606243	2.0178	1.01145	0.269101	0.730829	0.628426	0.81895	set23	AB	untreated	conidium
AN3077	4.06309	1.87273	1.98781	1.36464	1.12895	0.908757	1.02823	0.982412	0.598771	0.483215	0.746035	0.662995	0.343717	0.270748	0.122148	0.250474	set23	AB	untreated	conidium
AN3377	65.777	17.3122	22.0252	29.8412	63.9605	51.7782	33.7763	36.0971	24.2823	5.33242	8.90867	3.04997	15.8332	17.6232	9.82053	5.95505	set23	AB	untreated	conidium
AN3475	2.00333	0.855298	1.10248	1.86497	1.87836	3.51244	1.51771	3.02182	0.347257	0.238594	0.488994	0.387227	0.266607	1.94265	0.378652	1.25024	set23	AB	untreated	conidium
AN3481	19.8619	5.12262	9.54502	12.2877	8.25469	18.1376	9.56378	20.3462	7.69849	0.626021	4.62235	4.0399	2.368	14.2527	1.7615	11.9131	set23	AB	untreated	conidium
AN3529	1.37028	0.240627	0.465666	0.557765	0.41363	1.41869	1.0037	2.01764	0.365738	0.080252	0.249284	0.32213	0.137209	1.20253	0.0679192	1.1798	set23	AB	untreated	conidium
AN3600	79.88	54.3684	47.6193	60.5061	76.6699	54.3836	49.441	49.6305	12.5768	1.83041	6.44236	2.84357	14.6711	7.2651	4.05096	6.38919	set23	AB	untreated	conidium
AN3601	92.6238	26.6222	38.365	42.4377	44.7991	16.2583	35.1826	19.6411	10.7178	2.0727	11.6141	6.25301	8.5981	2.22865	3.77448	1.1422	set23	AB	untreated	conidium
AN3641	25.1749	17.4128	13.1603	10.7632	19.3094	19.2446	13.1452	17.8907	0.964763	10.5654	1.44269	2.66092	1.38657	1.84115	1.08688	2.07871	set23	AB	untreated	conidium
AN3790	911.467	110.214	153.284	144.411	42.0139	9.43572	31.1606	42.5673	636.887	18.1168	67.6987	54.2452	15.7266	7.4887	29.3221	27.6526	set23	AB	untreated	conidium
AN3791	44.0766	16.7985	12.5276	16.2645	4.89009	12.1348	6.19265	18.2581	21.0629	1.7554	7.03884	0.763527	0.698257	0.974847	1.2366	1.16024	set23	AB	untreated	conidium
AN3848	346.261	177.065	203.109	150.377	130.951	160.331	108.72	145.011	68.6682	29.9321	59.5247	25.183	27.8124	35.9616	31.0704	15.7922	set23	AB	untreated	conidium
AN4041	17.1963	9.47527	6.23398	10.0467	5.40855	7.86171	4.8456	7.96886	5.83099	1.48096	2.09233	3.40562	0.132389	3.01052	0.699874	2.40747	set23	AB	untreated	conidium
AN4115	1.78381	0.281677	0.631909	0.480995	1.17824	0.624212	0.687578	0.74201	0.807062	0.155971	0.123141	0.286677	0.537435	0.403642	0.116552	0.467014	set23	AB	untreated	conidium
AN4329	82.2307	45.9024	44.9591	49.3909	29.7902	64.5068	37.6284	59.5539	26.2844	10.1826	12.623	4.2212	4.6923	5.11453	6.34022	4.69574	set23	AB	untreated	conidium
AN4361	193.781	106.953	123.283	94.5918	164.564	114.147	120.495	106.27	19.0053	4.98026	7.74556	2.29152	21.4443	3.53544	6.95735	0.962915	set23	AB	untreated	conidium
AN4879	97.9272	32.2541	34.2403	36.1276	31.1321	28.0988	25.564	25.6857	38.2177	3.38809	11.9434	3.38738	4.66468	6.29805	4.23621	2.62229	set23	AB	untreated	conidium
AN5309	7.31403	1.70556	2.9966	2.10808	6.54256	1.14623	5.35263	1.79471	3.15631	0.933162	2.5216	1.26077	3.75382	0.340264	2.20733	1.08533	set23	AB	untreated	conidium
AN5581	42.8862	21.2383	24.9228	25.1478	36.0583	21.7893	26.1866	26.1752	7.32684	4.78311	3.36855	2.03423	8.50013	2.46297	3.12307	0.626409	set23	AB	untreated	conidium
AN5625	93.9108	34.8019	58.0324	47.8195	35.4512	36.9916	39.3228	42.3451	6.15917	4.14068	10.4719	0.821517	3.21248	2.5659	5.56009	4.96989	set23	AB	untreated	conidium
AN5855	17.7162	9.90669	9.74957	10.6244	15.2	13.2456	11.6934	13.5963	3.03511	4.16761	4.58231	1.92297	2.40404	5.78576	3.29653	6.69645	set23	AB	untreated	conidium
AN6241	45.0967	27.9145	25.9468	22.7058	18.9707	20.4351	15.3864	21.4828	3.29287	4.16355	3.57613	4.85954	1.23561	3.07395	2.57784	6.79135	set23	AB	untreated	conidium
AN6673	1.19239	0.783925	0.731397	0.678057	0.426401	0.619456	0.500143	0.768416	0.0798523	0.219976	0.0970719	0.218398	0.0552501	0.321927	0.162031	0.160132	set23	AB	untreated	conidium
AN6806	2.08972	0.963347	0.846201	0.900966	0.256158	0.468637	0.365832	0.680297	1.74445	0.195304	0.337285	0.49674	0.0872145	0.0564626	0.231689	0.219489	set23	AB	untreated	conidium
AN6821	9.80111	4.57002	4.86469	6.49351	1.69178	2.6139	2.88887	2.45772	3.44192	0.730972	1.21713	1.6363	0.749805	0.935534	0.545224	0.156775	set23	AB	untreated	conidium
AN7026	31.2847	18.5731	18.1169	26.467	25.2086	33.1108	19.8876	39.3363	3.37788	0.747592	4.43222	4.53611	5.89574	12.1993	5.57785	6.89886	set23	AB	untreated	conidium
AN7129	4.34921	2.23028	1.83326	2.21177	1.0481	0.804512	1.08344	1.5874	1.02983	1.4347	0.294909	0.699835	0.0945207	0.156258	0.386715	0.522724	set23	AB	untreated	conidium
AN7169	13.1064	8.99472	4.60242	8.81883	5.17901	11.5248	5.39799	12.641	8.51279	2.83939	1.84584	1.3918	0.752112	5.6897	2.37117	6.6752	set23	AB	untreated	conidium
AN7217	658.429	420.721	223.013	293.634	126.316	167.971	99.2033	321.11	283.369	76.5682	4.48675	56.3186	12.3286	46.9472	15.0101	127.927	set23	AB	untreated	conidium
AN7274	7.56453	5.61169	4.22025	6.51751	3.14754	2.40757	2.81809	5.62396	1.93553	0.242986	2.11876	3.99206	0.372606	0.346708	0.777842	3.89816	set23	AB	untreated	conidium
AN7295	19.5713	9.71899	9.08162	8.85587	13.0427	3.75497	8.20457	6.24422	2.62457	1.51383	2.21584	1.5586	1.425	1.49374	1.30429	1.25237	set23	AB	untreated	conidium
AN7597	8.35318	1.67338	4.80689	5.91383	7.20411	6.14769	5.31386	7.67396	1.64264	0.428648	0.652439	1.13165	1.45663	4.30647	0.812426	1.80539	set23	AB	untreated	conidium
AN7662	129.688	17.4544	34.0653	38.6279	105.929	45.5985	70.9942	48.1726	45.305	4.86308	10.4832	6.20807	18.7471	22.5848	11.5689	14.6913	set23	AB	untreated	conidium
AN7717	155.648	91.5506	77.6212	96.2456	76.0679	84.4222	73.6611	90.307	38.8829	1.15891	21.0895	6.72754	12.3358	2.17422	19.1302	10.8348	set23	AB	untreated	conidium
AN7860	1.86043	0.925139	0.57208	0.79498	2.35799	2.27673	1.49658	1.54021	0.375918	0.333793	0.0916826	0.240501	0.732641	0.570042	0.392648	0.547323	set23	AB	untreated	conidium
AN7915	1.63916	0.265612	0.688565	1.1853	1.64207	1.27518	1.24282	1.13554	0.396643	0.103284	0.183476	0.347129	0.112376	1.03736	0.142926	0.330549	set23	AB	untreated	conidium
AN8943	18.0394	7.5327	8.85124	8.76045	8.75367	9.18986	6.64531	10.827	3.04322	1.01952	0.919895	0.92075	2.0429	0.700895	0.590184	1.07401	set23	AB	untreated	conidium
AN9041	19.921	10.6684	8.97741	14.8113	4.09347	1.01594	4.2316	3.58407	9.41077	2.62471	3.46946	8.95017	0.275769	0.898984	0.37376	2.31122	set23	AB	untreated	conidium
AN9042	704.319	197.207	192.66	343.906	91.6578	17.521	55.027	78.3311	371.591	59.3404	116.073	266.694	10.9569	17.573	30.994	69.9127	set23	AB	untreated	conidium
AN9282	1.31816	0.327469	0.267548	0.233381	0.11976	0.0964161	0.0972287	0.113745	0.636143	0.231667	0.0354308	0.0811006	0.0648493	0.0988105	0.0408462	0.0259622	set23	AB	untreated	conidium
AN9311	15.3672	4.8326	8.07755	8.8581	6.56162	8.2064	6.10508	7.62416	5.58513	2.60453	2.86727	2.42166	0.757463	2.15182	0.403712	2.34805	set23	AB	untreated	conidium
tA(AGC)6	17.7847	8.04551	9.27411	8.84954	9.5916	2.39381	7.309	5.30212	3.00349	2.3257	4.69998	2.56648	3.68283	0.250401	2.41313	1.71607	set23	AB	untreated	conidium
AN12257	2.09016	0.199224	0.656007	0.62365	3.50854	0.188775	0.958062	0.290989	0.837157	0.243047	0.254591	0.363894	0.94279	0.167174	0.231425	0.317047	set23	AB	untreated	conidium
AN5653	21.1598	5.15615	7.43233	5.29612	24.4021	6.26692	8.87742	5.90765	3.73937	0.143404	1.76984	0.914271	4.48929	1.1065	0.525206	2.73467	set23	AB	untreated	conidium
AN7234	2.7922	0.0914586	1.00982	0.933029	2.04075	0.136093	0.58029	0.0985299	0.211156	0.107557	0.481173	0.790154	0.188057	0.235719	0.122068	0.0310235	set23	AB	untreated	conidium
AN10401	19.9253	11.8297	11.8749	10.1381	27.446	15.3957	13.7239	14.0201	3.79375	2.57189	0.301792	3.19184	12.1841	4.32711	2.34353	2.36934	set23	AB	untreated, MSB treated	conidium
AN10488	287.679	57.3257	104.538	116.418	622.403	244.816	184.254	228.497	73.0081	25.8642	31.0332	18.7043	308.878	143.25	58.6321	40.3942	set23	AB	untreated, MSB treated	conidium
AN11717	12.9959	9.33399	6.23985	8.1345	9.53634	4.59598	4.64175	5.90786	2.40376	4.01236	2.06685	2.22838	3.18878	1.15616	1.18372	2.78948	set23	AB	untreated, MSB treated	conidium
AN3079	18924.2	3475.83	2685.75	2232.03	6615.48	2359.76	1479.96	1883.75	851.155	216.643	316.696	264.682	1968.55	1355.4	600.425	1025.58	set23	AB	untreated, MSB treated	conidium
AN5258	1.83351	0.834729	0.78868	0.590386	1.67862	0.747274	1.00631	1.1445	0.41855	0.0371355	0.251014	0.127386	0.50987	0.136668	0.109738	0.116409	set23	AB	untreated, MSB treated	conidium
AN5262	14.1892	11.2554	8.62322	9.52309	15.3083	9.48998	7.56593	7.52728	2.47854	1.8787	1.66987	0.972384	6.56097	1.90277	0.585437	0.657464	set23	AB	untreated, MSB treated	conidium
AN5633	30.8621	9.98403	12.6338	11.531	40.4565	14.5705	18.4422	13.3195	2.41928	3.41032	5.54556	0.177895	2.31949	5.03672	0.792599	2.76584	set23	AB	untreated, MSB treated	conidium
AN6793	76.9287	34.9656	38.092	36.9377	65.1181	36.7786	36.7	34.6844	10.2191	2.47714	6.49974	6.0322	8.73397	4.40989	1.1337	3.98485	set23	AB	untreated, MSB treated	conidium
AN6972	12.6153	0.268461	1.28813	1.38329	8.91988	1.06055	1.53372	1.42889	4.62265	0.224785	0.836056	0.878728	4.49688	0.923849	0.105334	1.04871	set23	AB	untreated, MSB treated	conidium
AN7088	0.587113	0.0710261	0.0534687	0.0415332	0.459202	0.0738418	0.0452327	0.058053	0.040992	0.0423042	0.0649369	0.0364192	0.0510802	0.00946206	0.0178129	0.0550542	set23	AB	untreated, MSB treated	conidium
AN7172	33.2537	17.4913	16.5373	18.7328	42.0885	22.3726	17.5298	20.7948	4.98977	5.67964	1.78888	2.21806	10.3997	4.1478	0.328596	3.02134	set23	AB	untreated, MSB treated	conidium
AN7713	151.321	55.238	62.591	53.7944	115.837	39.1936	47.6072	45.2009	48.2651	3.82366	8.86182	3.01962	3.1608	1.87876	8.63727	4.46655	set23	AB	untreated, MSB treated	conidium
AN7861	3.75564	0.161068	0.0296514	0.0878822	3.16875	0.666968	0.147219	0.211347	1.35478	0.0117297	0.0513577	0.0772689	2.65787	0.54546	0.129298	0.237405	set23	AB	untreated, MSB treated	conidium
AN9005	23.7071	0.486308	1.85595	2.14871	11.7708	0.629117	1.37035	3.05625	2.42602	0.202973	0.151638	2.00002	0.661876	0.390327	0.397283	2.05018	set23	AB	untreated, MSB treated	conidium
AN0039	30.1405	24.2959	20.7605	16.3527	22.1919	12.5794	13.3892	9.64932	6.0304	5.86108	4.06215	1.74929	2.69571	5.27529	3.1177	2.11062	set23	AB	MSB treated	conidium
AN0460	28.9323	12.918	20.3078	9.13553	25.827	9.38703	13.1582	9.41174	7.35931	1.54345	5.05333	0.776191	0.256358	1.1021	4.02181	0.216617	set23	AB	MSB treated	conidium
AN10608	10.7764	10.1516	9.39494	12.1645	16.6873	12.4514	9.69632	10.0184	0.782627	4.35883	2.75819	0.473599	2.79473	1.54579	0.172415	0.535924	set23	AB	MSB treated	conidium
AN10617	16.3922	10.4682	13.0013	13.4444	19.2722	9.98631	11.4489	10.6692	2.47396	3.46324	4.01827	3.11808	2.28356	1.64982	1.50214	1.22917	set23	AB	MSB treated	conidium
AN10676	48.9551	40.1102	35.3071	58.7277	85.0107	62.8423	48.2494	62.3246	6.97131	5.72594	7.59264	6.4853	23.8989	17.5196	8.22974	11.14	set23	AB	MSB treated	conidium
AN1179	166.479	141.359	139.469	124.028	183.016	106.892	107.769	103.697	24.5805	3.3106	9.11453	10.1628	13.9883	40.0661	12.6931	30.6294	set23	AB	MSB treated	conidium
AN1197	12.3432	31.3917	13.5534	34.5312	31.7472	24.8745	17.67	21.3161	1.8387	2.90318	2.39648	4.28493	12.0296	4.4052	4.26475	2.92299	set23	AB	MSB treated	conidium
AN1663	12.5947	5.69919	11.474	6.44263	15.4611	5.36793	8.44075	6.31555	4.8213	1.44253	1.92752	0.644465	1.40564	0.698612	2.14128	0.329719	set23	AB	MSB treated	conidium
AN1713	105.929	122.138	66.1905	70.4788	72.8439	41.9233	41.9743	49.4245	18.663	91.337	19.0359	4.64028	5.29819	25.5693	9.1193	28.3839	set23	AB	MSB treated	conidium
AN2478	14.9251	11.9058	14.4637	16.7611	28.8287	13.2835	17.1573	14.2074	1.42596	4.54058	5.61044	3.77978	4.31484	1.65156	2.31225	0.886979	set23	AB	MSB treated	conidium
AN2684	20.1643	28.1468	12.6994	14.2218	17.2024	13.1209	6.65626	13.11	5.9513	2.24518	2.6174	1.85119	6.22857	7.74243	1.09715	0.624558	set23	AB	MSB treated	conidium
AN2942	53.5102	38.5245	37.1502	32.5603	26.0589	11.9966	15.0739	16.8706	12.4599	7.59904	9.10907	4.20899	1.37771	1.70802	4.35081	5.5092	set23	AB	MSB treated	conidium
AN4807	102.906	186.792	98.1456	329.839	185.84	84.4499	91.6188	142.24	12.9536	12.0032	20.8934	102.319	73.4358	38.1963	18.2174	75.2946	set23	AB	MSB treated	conidium
AN4831	67.4255	48.4387	46.9858	27.676	40.8081	23.5673	22.9709	18.4052	11.7457	10.7429	9.38021	1.10691	9.84853	12.4297	5.96777	4.00729	set23	AB	MSB treated	conidium
AN4832	39.8665	31.1288	29.8666	17.0495	25.0908	13.3119	14.1677	10.7298	6.91295	1.88437	6.36275	0.780273	4.57194	9.06362	5.59176	3.3988	set23	AB	MSB treated	conidium
AN6658	341.518	654.005	198.327	122.325	651.199	252.509	212.507	194.531	86.4393	239.38	63.7917	37.6442	376.837	251.846	88.4434	11.074	set23	AB	MSB treated	conidium
AN1767	55.2549	20.1483	28.4471	18.6716	50.2503	15.5291	22.8203	15.9814	9.7482	2.87583	4.45	0.848441	1.144	4.88779	3.59174	1.81619	set23	AB	MSB treated	conidium
AN2042	117.85	56.1347	59.9838	35.524	129.144	60.4453	64.1913	43.1851	11.641	9.64739	5.56784	1.99239	23.5301	3.27553	5.03961	3.03062	set23	AB	MSB treated	conidium
AN2672	2.60172	0.30151	0.477105	0.256111	1.97319	0.13856	0.285815	0.19699	0.224776	0.218684	0.0473794	0.0386303	0.408427	0.0254216	0.180248	0.0690169	set23	AB	MSB treated	conidium
AN3434	97.8023	52.0695	50.2655	34.6688	56.609	31.5694	31.9821	31.7751	28.9028	3.72579	17.4239	0.428252	6.51621	8.00024	7.87308	5.75046	set23	AB	MSB treated	conidium
AN3513	2.66628	1.29964	1.6213	0.909202	2.66556	1.23256	1.26279	0.959379	0.370765	0.0608826	0.592739	0.136305	0.285348	0.37534	0.191889	0.0261566	set23	AB	MSB treated	conidium
AN5207	114.23	20.5969	49.3601	29.9647	79.0935	28.6157	45.0337	30.5848	28.0936	3.22783	13.02	3.17123	10.2891	3.59058	5.03284	1.45286	set23	AB	MSB treated	conidium
AN7166	1102.21	421.356	517.211	353.232	621.703	337.436	313.826	332.912	311.265	37.1215	129.966	56.6541	166.795	32.7253	15.0508	99.4543	set23	AB	MSB treated	conidium
AN7298	134.627	42.0431	63.0359	33.8776	97.0245	39.2644	49.871	50.1301	9.61982	17.8158	7.17124	6.39213	5.21698	8.44063	8.33322	10.8802	set23	AB	MSB treated	conidium
AN8051	82.8689	20.126	41.7888	24.6491	48.6218	22.7027	28.4409	19.4469	23.9354	1.25789	10.2412	1.84702	3.38235	3.98863	7.02146	1.98185	set23	AB	MSB treated	conidium
AN9027	67.4334	15.8969	10.7296	3.23934	4.76998	5.00302	1.60582	1.98114	8.76054	10.1507	7.15653	0.815935	0.294759	6.26969	1.14846	1.58454	set23	AB	MSB treated	conidium
AN1279	31.2433	7.44851	17.3185	7.34722	15.6806	7.09491	8.85231	10.2606	3.71171	0.941435	5.66721	0.994851	3.48911	2.83058	1.97884	1.62769	set23	AB	MSB treated	conidium
AN0197	4.3548	5.11526	4.29549	2.38341	4.80055	1.11572	4.12225	0.995189	0.26562	1.94033	1.38999	0.238724	1.569	0.455767	1.09767	0.165808	set24	A/B	untreated	conidium
AN0482	10.7319	18.0469	10.7846	6.12154	5.51687	6.1577	4.84631	5.98525	0.800906	13.7767	2.73227	2.43763	1.28706	0.556438	2.58409	1.79261	set24	A/B	untreated	conidium
AN0554	325.65	387.997	327.901	188.474	295.417	522.584	326.747	331.595	25.2092	185.067	69.564	3.65016	119.531	67.9413	25.7316	29.5377	set24	A/B	untreated	conidium
AN0660	19.6883	26.0718	28.4505	12.1225	22.7208	12.4211	25.4965	11.0924	3.66908	9.98441	1.4215	0.69989	0.929516	3.27105	4.5365	2.24554	set24	A/B	untreated	conidium
AN10398	14.3217	22.4839	18.6906	7.88162	9.17389	8.1601	11.8814	6.34605	3.57715	7.37799	6.88245	1.60731	3.35043	4.06043	2.84811	1.03604	set24	A/B	untreated	conidium
AN10533	787.079	685.433	575.304	355.352	673.529	350.118	433.165	214.63	37.15	53.9143	121.621	55.3999	34.4919	329.687	81.2299	84.57	set24	A/B	untreated	conidium
AN10566	6.19852	9.44797	6.27234	4.16307	4.23232	3.90101	3.87419	3.84847	2.09823	9.118	2.55272	0.307152	1.093	0.948227	0.321883	0.544367	set24	A/B	untreated	conidium
AN1072	7.9164	7.15891	13.6248	2.18453	3.5901	3.19216	6.65141	1.93328	2.28804	0.984757	4.55038	0.129123	1.42408	1.80157	3.97446	0.55482	set24	A/B	untreated	conidium
AN10897	1.19905	1.41781	0.730723	0.266468	0.277353	0.377078	0.383868	0.271942	0.245259	0.720825	0.294733	0.0567256	0.221973	0.387319	0.119862	0.0210097	set24	A/B	untreated	conidium
AN11092	9.31782	13.5854	9.76474	5.45571	4.05988	3.97328	5.7297	4.24408	2.92358	5.4795	4.37109	0.631113	0.657247	2.03799	1.08503	1.48673	set24	A/B	untreated	conidium
AN11096	7.36782	13.6378	9.9243	1.42766	1.35029	3.18659	4.04022	0.542271	1.69535	3.10941	5.00652	0.220442	0.61511	4.55514	2.22318	0.618936	set24	A/B	untreated	conidium
AN11099	9.30867	15.0292	9.53866	6.37823	4.13746	4.67278	6.02767	3.80019	0.611424	3.74998	1.78817	0.235704	0.725843	1.8022	1.78267	1.47841	set24	A/B	untreated	conidium
AN11212	0.723936	1.80815	1.1233	0.312564	0.41694	1.23229	0.421883	1.03414	0.160925	1.79455	0.624761	0.141625	0.258152	0.312835	0.176043	0.48281	set24	A/B	untreated	conidium
AN11408	11.3048	12.3005	9.93826	5.78957	4.5682	8.39112	6.14707	6.63265	1.33158	1.30446	4.56477	0.87887	1.21681	3.44938	1.23826	0.775961	set24	A/B	untreated	conidium
AN11818	0.240179	0.600583	0.985016	0.100135	0.262719	0.324906	0.427502	0.276153	0.11604	0.464831	0.440365	0.0867331	0.222295	0.184024	0.229034	0.0725478	set24	A/B	untreated	conidium
AN12084	398.888	557.243	370.461	227.2	269.005	274.069	268.456	171.156	26.4979	227.944	91.9887	20.803	20.9952	190.155	80.4772	66.6104	set24	A/B	untreated	conidium
AN1300	7.89863	11.5864	14.0145	4.35428	4.25518	3.30643	13.2467	2.45472	0.221587	7.48289	1.08464	1.06564	0.420443	0.78661	3.1985	0.702949	set24	A/B	untreated	conidium
AN1641	5.01468	8.77395	7.11974	3.82104	4.43249	3.26114	6.1329	2.7199	1.08718	3.69198	1.76903	0.568578	0.427159	1.54861	0.97184	0.174341	set24	A/B	untreated	conidium
AN1642	0.124815	27.7285	0.12834	0.00857758	0.0738374	0.60937	0.0837835	0.048932	0.0579339	22.8254	0.190239	0.0148568	0.00603559	0.937374	0.0233505	0.0584097	set24	A/B	untreated	conidium
AN1726	23.1438	35.4584	27.8636	17.0204	29.0153	23.2508	24.0131	19.6435	3.38874	19.1672	3.47969	3.03155	6.72427	6.14075	0.453244	3.6256	set24	A/B	untreated	conidium
AN1737	1.09106	1.73228	1.21337	0.392385	0.405091	1.87303	1.09897	0.80424	0.0813618	0.696543	0.196772	0.207587	0.0331128	0.208169	0.289669	0.15648	set24	A/B	untreated	conidium
AN1896	13.5939	39.933	16.9867	11.005	12.5715	38.4326	13.5046	14.8578	1.81688	6.82679	3.25344	1.79753	5.30424	24.8614	3.99145	3.24997	set24	A/B	untreated	conidium
AN1919	23.3013	26.4898	20.0002	11.7881	8.18094	9.83045	10.8427	13.6191	2.36137	18.7455	6.67147	1.34948	0.242922	2.16366	2.94756	2.19008	set24	A/B	untreated	conidium
AN2041	1.21747	2.40938	1.1619	0.722485	0.226723	1.04932	0.661369	0.299791	0.0276331	0.346865	0.157343	0.286446	0.108391	0.63178	0.355752	0.188541	set24	A/B	untreated	conidium
AN2319	0.445384	0.334679	0.433259	0.0644376	0.167551	0.153665	0.238647	0.198128	0.169109	0.119445	0.100771	0.0123547	0.021771	0.0348691	0.133618	0.0739074	set24	A/B	untreated	conidium
AN2324	4.13873	7.07694	8.16388	2.94495	3.2141	2.57439	5.7007	2.25767	0.781967	3.4829	1.08927	0.179439	1.09603	2.04813	1.12971	0.206824	set24	A/B	untreated	conidium
AN2533	2.48559	4.83262	3.60105	2.14642	2.21477	2.09721	2.41535	1.71508	0.891815	1.54271	0.592442	0.210213	0.533829	1.25318	0.829708	0.387491	set24	A/B	untreated	conidium
AN2663	8.80636	16.7709	11.5157	6.89044	5.81163	4.89214	8.06353	5.89436	1.03055	7.64862	0.224149	1.26647	1.05924	3.20294	1.67734	2.87795	set24	A/B	untreated	conidium
AN2780	5.44326	9.97871	10.4731	4.22021	2.96796	6.4321	4.10031	4.44961	0.956833	6.37916	3.11039	0.754026	0.439401	4.4556	1.96603	0.67148	set24	A/B	untreated	conidium
AN2784	5.83852	6.59475	6.53116	2.69493	5.46896	5.51971	7.73374	2.74936	1.3883	1.27771	2.25899	0.0439014	0.573752	4.24179	2.13196	0.454692	set24	A/B	untreated	conidium
AN2798	9.43454	9.26134	17.1097	4.54806	10.4779	5.85508	15.2295	4.8603	1.30779	2.85524	2.07685	0.748372	1.02825	2.49582	0.780955	0.990983	set24	A/B	untreated	conidium
AN2860	32.8928	50.8367	37.0741	24.7939	24.5464	26.5664	26.0912	21.6472	2.43218	12.9839	1.83608	1.5397	3.02466	11.0714	1.45784	3.29404	set24	A/B	untreated	conidium
AN3203	475.971	659.429	388.967	208.685	291.99	191.452	235.448	185.932	26.6032	390.384	80.8331	41.3756	22.2402	191.408	36.0719	119.96	set24	A/B	untreated	conidium
AN3515	1.92461	2.10793	1.83038	1.01707	1.18877	2.19505	1.54597	1.62905	0.374803	0.962177	0.477497	0.172995	0.274579	0.164389	0.511712	0.212088	set24	A/B	untreated	conidium
AN3984	0.518733	1.05663	0.966952	0.168765	0.288479	0.903295	0.552895	0.265849	0.3189	0.264804	0.477098	0.0854132	0.136622	0.344829	0.325429	0.276821	set24	A/B	untreated	conidium
AN4126	1.22179	2.86079	1.07112	0.523551	0.437323	2.12783	0.67636	0.571933	0.0774343	0.398362	0.331934	0.103155	0.0999384	2.29294	0.28205	0.437467	set24	A/B	untreated	conidium
AN4289	33.3437	53.9134	42.4822	24.2	17.7833	17.4616	23.4121	14.1281	2.9103	13.8934	9.13114	3.41144	3.93136	9.4533	10.2647	2.25892	set24	A/B	untreated	conidium
AN4451	9.05162	12.5418	9.42407	6.19906	4.50645	5.36017	6.19698	4.85976	1.85499	7.27433	1.58072	0.757786	0.926375	1.60524	0.67893	0.674657	set24	A/B	untreated	conidium
AN4508	149.486	187.608	139.424	93.4105	121.126	145.375	110.751	97.6118	20.563	36.9963	42.5452	1.46941	10.3314	54.5361	19.6365	11.0893	set24	A/B	untreated	conidium
AN4608	27.4323	30.2373	31.1102	13.6026	23.219	18.6276	22.7515	12.8735	2.94402	4.906	3.62757	0.739564	1.07002	3.01575	5.29673	2.03936	set24	A/B	untreated	conidium
AN4900	59.107	102.712	73.1261	50.2873	41.9623	59.8885	49.2575	47.0167	2.4517	38.5094	19.3463	3.03451	1.64696	27.9064	11.0234	5.38564	set24	A/B	untreated	conidium
AN5274	4.94509	14.2722	7.80274	3.75424	2.16624	7.89011	5.59788	5.6886	0.684491	9.27137	2.72097	1.03547	0.631034	7.27128	1.24118	1.99325	set24	A/B	untreated	conidium
AN5449	106.172	120.578	102.349	58.039	136.029	56.696	165.308	62.0962	25.4422	60.344	28.003	6.0244	23.1652	31.4872	27.9763	24.1218	set24	A/B	untreated	conidium
AN5466	0.43178	0.420963	0.534516	0.0933056	0.170197	0.173497	0.155108	0.0924425	0.159447	0.265143	0.140207	0.0347005	0.0981416	0.129999	0.160893	0.0290347	set24	A/B	untreated	conidium
AN5781	34.5614	58.5868	32.4886	20.6588	21.5828	46.7651	19.0605	23.4104	0.866393	10.2552	10.4763	2.40644	0.80307	22.5145	2.22514	2.53591	set24	A/B	untreated	conidium
AN5948	12.7922	17.0698	16.0346	8.00771	7.77762	6.26202	10.0305	6.93791	1.69862	12.0902	3.04931	1.57866	1.01099	1.52712	2.31083	0.137654	set24	A/B	untreated	conidium
AN5993	8.14043	33.9653	26.2341	5.75422	10.4948	28.9041	19.9909	12.4357	1.31636	5.83858	10.3271	2.06923	1.80889	17.4113	2.3003	4.37269	set24	A/B	untreated	conidium
AN6151	13.3037	1033.6	17.153	2.22095	11.3244	430.841	4.00996	2.68722	3.00743	744.042	13.645	1.63235	0.0791308	742.285	1.6508	3.56515	set24	A/B	untreated	conidium
AN6379	74.6698	130.126	55.6743	27.9824	24.887	42.5179	25.469	35.592	5.1483	98.6371	24.7911	3.37779	5.86431	10.5432	1.72361	9.08007	set24	A/B	untreated	conidium
AN6422	3.40498	13.5686	5.7142	2.4271	1.53869	5.23029	3.64689	2.92895	0.247858	1.66277	2.29824	0.334867	0.479235	2.90297	0.717724	0.126276	set24	A/B	untreated	conidium
AN6642	542.521	674.916	582.719	208.534	350.991	303.483	361.519	132.478	62.4892	307.822	163.406	8.52459	31.2324	302.297	72.6184	98.7056	set24	A/B	untreated	conidium
AN6747	8.868	10.2596	9.02698	1.78856	3.73923	7.70275	4.43582	4.45244	1.36598	7.68662	2.39396	0.554715	0.290615	5.41246	1.04423	0.915225	set24	A/B	untreated	conidium
AN6858	11.1986	15.6835	12.731	7.03719	8.91594	10.1337	9.65827	7.39691	2.40513	3.11441	2.03046	0.442057	0.339802	2.48376	0.396361	0.782154	set24	A/B	untreated	conidium
AN7061	0.461751	2.51611	0.806006	0.235482	0.210981	1.19908	0.39453	0.291709	0.157138	1.97305	0.160503	0.0605528	0.00420466	1.59909	0.233632	0.183994	set24	A/B	untreated	conidium
AN7118	0.345836	0.852682	0.669455	0.231348	0.180592	0.344061	0.502155	0.180173	0.142341	0.659788	0.0994323	0.023938	0.103639	0.315044	0.141395	0.0273694	set24	A/B	untreated	conidium
AN7199	4.74234	8.54687	6.46996	4.13374	5.33155	11.357	7.01938	6.62582	1.36388	1.13589	1.19297	0.0331241	0.763255	3.34285	0.737546	1.55217	set24	A/B	untreated	conidium
AN7215	18.7199	63.8684	53.8581	7.31019	15.4361	116.907	29.4014	47.7966	5.78444	36.0867	24.767	2.17805	3.31638	18.7455	7.39679	36.1023	set24	A/B	untreated	conidium
AN7225	10.892	23.767	19.1578	8.56169	5.41903	14.0327	12.6319	9.94836	0.119424	17.835	3.91522	1.14562	0.951553	9.04622	5.5899	4.43642	set24	A/B	untreated	conidium
AN7321	24.4539	29.44	29.2025	14.0876	18.4628	18.8929	17.8061	12.2106	2.37595	2.57431	7.79803	0.559882	0.26394	9.31843	5.14275	2.33266	set24	A/B	untreated	conidium
AN7324	9.56479	13.482	13.5593	4.33083	9.32365	8.49795	10.4108	5.49435	1.84227	7.0082	3.08788	0.339284	1.07342	1.31586	1.4804	0.567811	set24	A/B	untreated	conidium
AN7605	17.1915	20.689	13.6669	8.90052	6.30328	5.35377	6.50821	4.978	2.11755	14.2925	3.02172	0.855196	1.12207	1.70343	2.19497	1.88912	set24	A/B	untreated	conidium
AN7613	0.427719	0.58656	0.566917	0.239069	0.322784	0.413158	0.404027	0.371384	0.0489817	0.340071	0.188952	0.0768476	0.0691182	0.0772851	0.0909867	0.0888851	set24	A/B	untreated	conidium
AN8043	35.4217	70.3721	109.266	16.8787	33.622	42.584	42.182	26.975	4.72878	13.1007	70.6533	3.1942	3.28181	29.6144	11.2187	8.18174	set24	A/B	untreated	conidium
AN8355	2.81771	4.61517	3.51309	1.97784	2.22647	2.54969	2.85292	2.45948	0.22228	1.17219	0.211304	0.116943	0.173917	1.49049	0.226852	0.322724	set24	A/B	untreated	conidium
AN8356	27.2072	26.2833	22.3442	7.75785	16.2569	18.0933	20.2083	7.60959	9.86012	5.86831	2.06749	1.16463	1.62378	16.7114	0.75101	3.24401	set24	A/B	untreated	conidium
AN8467	1.90745	4.09755	2.24427	0.867936	1.22275	3.76875	1.32427	1.49414	0.409186	1.22473	0.117918	0.206503	0.170734	2.06431	0.413724	0.289653	set24	A/B	untreated	conidium
AN8471	2.20054	2.31327	2.34826	0.34368	1.73862	1.65679	2.27097	0.456518	0.219568	1.82503	0.416948	0.158343	0.267697	1.82141	0.599432	0.188492	set24	A/B	untreated	conidium
AN8475	1.47544	2.12037	0.779797	0.209009	0.421828	1.60523	0.689809	0.487717	0.234888	2.10897	0.311916	0.150541	0.0592758	1.39275	0.0936053	0.277786	set24	A/B	untreated	conidium
AN8476	0.62744	0.881797	0.57837	0.237907	0.192108	0.508548	0.509706	0.375782	0.0636948	0.624045	0.0987708	0.0675305	0.110309	0.160746	0.180879	0.105937	set24	A/B	untreated	conidium
AN8483	504.706	747.142	782.866	255.733	228.167	345.24	494.822	305.988	30.0685	493.815	150.473	89.5892	12.1912	247.272	161.063	7.8258	set24	A/B	untreated	conidium
AN8532	2.76396	19.9075	3.62466	1.44645	1.12748	20.2853	1.86093	2.44051	0.55431	8.97015	1.16172	0.704492	0.30787	19.5141	0.818777	0.469416	set24	A/B	untreated	conidium
AN8812	22.5583	21.9099	86.6964	9.3428	33.394	13.2238	33.8745	8.25858	5.79657	6.1569	60.841	0.28433	16.9848	5.97826	8.74392	0.716393	set24	A/B	untreated	conidium
AN8958	6.90558	18.2149	10.114	1.5094	4.11233	2.01305	6.18661	1.34711	0.73808	13.0647	2.62143	0.260234	0.875287	2.27273	0.663927	0.380245	set24	A/B	untreated	conidium
AN8966	182.382	204.279	199.815	89.9021	134.709	132.683	129.524	77.17	20.5248	44.1322	61.5192	11.2059	7.48958	68.1167	32.0079	7.27429	set24	A/B	untreated	conidium
AN8982	2.09461	2.31729	4.17025	1.13813	1.67201	1.71532	3.65289	1.92189	0.619638	1.35918	0.226717	0.00451913	0.153966	0.733016	0.388368	0.507347	set24	A/B	untreated	conidium
AN8987	3.7625	5.35926	8.59686	1.46321	1.93254	1.44332	4.35536	1.55262	0.537441	5.18604	2.96575	0.211028	0.634832	0.704938	0.581012	0.493575	set24	A/B	untreated	conidium
AN8989	13.1598	102.652	33.8784	5.47277	8.18371	40.0647	13.4668	6.4882	2.14402	86.1832	10.088	1.79615	1.94102	48.1532	4.86414	1.55978	set24	A/B	untreated	conidium
AN9028	9.10774	15.5389	6.71986	1.52854	4.85861	11.6847	3.99405	3.18929	1.2204	14.9202	4.21934	0.439011	1.55564	13.0176	1.81725	0.590892	set24	A/B	untreated	conidium
AN9050	0.66191	0.946623	0.685156	0.344041	0.13212	0.504892	0.270294	0.323165	0.298159	0.224401	0.116805	0.114787	0.0823367	0.298824	0.0389134	0.133386	set24	A/B	untreated	conidium
AN9523	71.9056	80.3655	66.0993	35.2865	71.6348	40.8859	55.5331	30.3276	18.7703	21.6741	6.4415	0.564423	1.74109	10.8628	13.1246	4.4285	set24	A/B	untreated	conidium
AN11094	94.8753	150.553	142.927	26.5598	88.7478	61.4891	142.401	13.7394	4.94339	4.11508	14.1784	8.27633	3.69217	61.571	22.9699	6.44081	set24	A/B	untreated	conidium
AN3210	429.022	706.806	624.104	245.31	271.198	340.132	258.604	151.483	25.1775	166.505	134.506	16.9817	51.6151	221.402	49.1343	23.855	set24	A/B	untreated, MSB treated	conidium
AN5129	1403.35	3006.56	1720.11	888.818	1018.47	2205.42	1206.59	683.572	118.671	333.792	473.75	195.97	19.1129	2379	402.058	432.255	set24	A/B	untreated, MSB treated	conidium
AN6801	36.4599	35.0899	64.2088	16.9481	21.0788	35.6982	47.5982	14.9897	7.04074	4.06761	1.55742	2.15564	2.51365	25.1353	15.0772	6.96831	set24	A/B	untreated, MSB treated	conidium
AN0015	1.2559	0.39277	1.13605	0.0818123	1.76118	4.13156	1.36097	0.698832	0.289399	0.244131	0.0403131	0.00668386	0.208737	3.12634	0.0236094	0.456193	set24	A/B	MSB treated	conidium
AN6396	2.81742	2.08442	3.76574	0.920871	2.04143	1.69759	2.261	0.675655	0.857041	0.280912	1.57125	0.210674	0.219975	0.722509	1.20942	0.0275	set24	A/B	MSB treated	conidium
AN8999	0.828965	0.683958	0.797906	0.144379	0.149831	0.266392	0.526702	0.0470322	0.156363	0.152437	0.0808877	0.040122	0.154647	0.153917	0.105606	0.0306713	set24	A/B	MSB treated	conidium
AN10288	2.1003	1.81059	3.30151	1.13569	1.86552	1.77948	2.38039	0.776356	0.456309	0.0974347	0.585749	0.200246	0.181987	0.202258	0.350025	0.0801389	set24	A/B	MSB treated	conidium
AN10547	43.6562	45.423	55.3115	23.8241	39.069	40.7296	39.2958	16.8625	8.35328	9.73905	15.3134	0.613292	4.38158	39.2585	12.9392	4.29967	set24	A/B	MSB treated	conidium
AN10168	193.144	175.556	117.294	81.2065	97.2949	119.185	81.8557	78.4925	27.8453	64.7992	26.4573	4.46143	5.32348	79.6563	13.8871	11.3908	set25	A-B1	untreated	conidium
AN10297	26.541	19.7225	13.2509	7.23905	5.69641	5.85618	5.57161	12.8624	5.32256	6.20236	0.959198	3.28108	0.386217	1.36272	2.29272	9.05298	set25	A-B1	untreated	conidium
AN12195	222.529	2.67405	116.41	1.30581	146.254	1.37705	91.9148	1.6104	8.45225	1.19907	14.7862	0.30141	7.57811	0.242837	21.5147	0.186856	set25	A-B1	untreated	conidium
AN2530	66.4639	57.1916	33.2894	20.5067	20.4494	50.998	13.496	27.7325	6.94747	6.66963	15.3541	1.78488	0.707737	24.8665	1.56575	8.10586	set25	A-B1	untreated	conidium
AN5947	63.2408	32.0479	34.9856	4.43961	20.337	7.60048	18.563	4.85188	9.69527	39.6721	15.5088	0.855135	2.01317	5.3225	6.3984	0.645651	set25	A-B1	untreated	conidium
AN7898	12.5939	5.593	7.36018	2.53121	5.8513	4.15856	5.40183	3.09499	2.23481	2.68555	1.1753	0.424189	0.854021	1.39116	2.14089	1.02593	set25	A-B1	untreated	conidium
AN8636	434.399	69.778	231.77	15.6931	70.7821	35.8753	60.2223	10.1027	54.6482	8.34164	115.981	0.875704	3.64116	46.6673	36.9429	5.91787	set25	A-B1	untreated	conidium
AN9027	67.4334	15.8969	10.7296	3.23934	4.76998	5.00302	1.60582	1.98114	8.76054	10.1507	7.15653	0.815935	0.294759	6.26969	1.14846	1.58454	set25	A-B1	untreated	conidium
AN0759	195.998	11.8205	80.8623	4.58437	49.0737	30.2773	35.9051	5.15733	23.176	4.35971	34.938	2.12661	19.3954	16.4786	25.3565	2.66292	set25	A-B1	untreated, MSB treated	conidium
AN10461	134.445	48.1336	80.9553	18.2325	138.118	33.848	78.2012	33.0377	20.0496	16.8349	13.2257	5.4379	24.5401	12.0367	9.34302	7.97441	set25	A-B1	untreated, MSB treated	conidium
AN5324	5830.36	36.1592	1984.99	18.8674	1189.22	20.4268	608.036	17.4138	957.775	4.46343	629.325	4.07134	233.735	8.21045	311.759	5.28399	set25	A-B1	untreated, MSB treated	conidium
AN7907	193.654	26.5387	96.4082	4.0867	117.745	12.6686	53.8423	4.28945	11.713	25.6533	51.6598	0.935825	9.1616	12.177	16.9608	2.77136	set25	A-B1	untreated, MSB treated	conidium
AN8639	730.651	11.8207	407.649	4.90236	468.34	9.398	270.939	6.8945	49.8252	3.01975	82.3486	0.921137	17.7965	2.39678	88.4052	1.8048	set25	A-B1	untreated, MSB treated	conidium
AN0015	1.2559	0.39277	1.13605	0.0818123	1.76118	4.13156	1.36097	0.698832	0.289399	0.244131	0.0403131	0.00668386	0.208737	3.12634	0.0236094	0.456193	set25	A-B2	untreated	conidium
AN0390	94.7298	6.51187	75.3338	3.00391	68.0125	3.14021	60.1403	2.27312	18.6245	4.38729	6.64307	0.823196	10.4939	2.62585	8.45993	0.500025	set25	A-B2	untreated	conidium
AN0518	17.081	8.40161	14.4707	4.04414	14.2965	5.58708	15.4698	5.54562	3.7688	0.764092	1.23738	1.29139	2.85738	3.69524	1.79829	1.65206	set25	A-B2	untreated	conidium
AN0887	35.0772	12.8732	27.5179	5.53002	27.2049	11.7878	20.6883	6.10201	10.3934	3.00055	7.97032	0.527964	2.6089	4.04633	3.6014	1.27767	set25	A-B2	untreated	conidium
AN0948	37.2073	23.5214	27.8986	6.8522	13.1673	8.88288	12.6198	6.07222	8.69062	13.0872	9.79127	0.81173	3.42316	4.242	6.39616	0.837479	set25	A-B2	untreated	conidium
AN10368	73.6457	25.2906	75.9131	8.27526	50.3071	4.92593	63.8658	3.88246	8.80211	28.3151	14.9239	3.26136	6.72878	3.67632	9.99873	0.766879	set25	A-B2	untreated	conidium
AN10421	305.953	0.828654	196.529	0.343792	273.037	0.400606	179.68	0.143563	33.6364	0.422387	27.2395	0.120097	40.6178	0.361855	15.3588	0.128199	set25	A-B2	untreated	conidium
AN10613	2.0889	0.450637	1.59945	0.170712	2.05301	0.216866	2.83158	0.357022	0.294112	0.266763	0.568843	0.107757	0.209136	0.155496	0.210625	0.188937	set25	A-B2	untreated	conidium
AN10660	288.288	0.689053	188.268	0.224385	300.037	0.652417	183.841	0.356818	7.691	0.124269	1.53078	0.194325	20.7674	0.257552	25.9645	0.0702512	set25	A-B2	untreated	conidium
AN10699	47.133	2.5527	62.4134	1.2157	25.8636	0.70641	25.6193	0.732394	5.45029	0.365904	19.8168	0.35244	3.15816	0.240861	10.4536	0.209014	set25	A-B2	untreated	conidium
AN11185	145.854	78.5203	130.998	25.5062	118.966	18.4085	95.6557	20.4029	23.7119	88.1457	32.2668	1.8731	12.0592	16.1603	15.9525	16.5857	set25	A-B2	untreated	conidium
AN11276	35.481	23.5599	24.8127	11.1826	9.59816	12.4941	13.927	19.7767	5.05789	15.1223	14.4812	0.577908	2.41579	6.16331	2.92963	5.00857	set25	A-B2	untreated	conidium
AN11882	10.2293	8.61043	6.85861	3.02637	6.63295	5.06902	6.59147	2.85093	2.26066	6.7837	0.105357	1.34845	1.19754	0.596102	0.739179	0.470557	set25	A-B2	untreated	conidium
AN11907	12.4564	6.40721	8.24525	2.74119	6.16431	4.43062	5.88416	2.50376	1.43755	2.33585	1.2721	0.760397	0.278653	3.85403	1.70502	0.709915	set25	A-B2	untreated	conidium
AN12116	1.44934	0.655841	2.15078	0.208027	0.772265	0.464503	1.73252	0.329671	0.342285	0.168329	1.02958	0.0893087	0.277971	0.361424	0.521888	0.138557	set25	A-B2	untreated	conidium
AN12189	97.4073	5.88995	106.862	2.79808	63.9185	5.54398	76.5666	3.55187	27.2791	2.87456	35.0842	0.162104	2.30479	1.29194	29.1263	0.686768	set25	A-B2	untreated	conidium
AN12193	8.96836	5.90084	9.40752	2.43192	6.34445	0.851636	9.39603	1.04413	2.27441	3.60644	1.16338	0.697573	0.838524	0.543487	1.77044	0.212174	set25	A-B2	untreated	conidium
AN12377	72.5121	3.76389	87.7582	0.576651	46.9425	1.17787	70.0675	1.30042	4.74932	2.32977	25.1662	0.224998	2.85558	0.431419	24.3057	0.357453	set25	A-B2	untreated	conidium
AN1930	45.9124	14.9166	58.7887	5.98265	19.7543	5.45077	45.754	4.49265	9.24901	3.15166	14.1615	0.630865	10.3374	3.35492	6.95912	1.00359	set25	A-B2	untreated	conidium
AN2199	24.3337	10.6887	48.2636	4.45784	31.0053	6.98323	49.0438	5.44572	7.99987	6.80584	12.5465	0.435284	7.22095	3.9113	7.04643	0.781793	set25	A-B2	untreated	conidium
AN2238	210.228	148.013	185.329	70.6098	152.157	84.5349	128.491	52.7268	28.4359	68.1116	45.2531	6.42029	22.7139	62.6268	26.8631	18.7634	set25	A-B2	untreated	conidium
AN2570	28.204	10.0567	37.4483	2.43779	7.53336	3.90306	20.7123	2.59885	2.7424	5.61685	17.9814	0.177481	0.190619	4.99448	5.86073	2.1714	set25	A-B2	untreated	conidium
AN2639	82.0229	2.79712	75.4064	1.39377	79.4795	1.19205	67.8766	1.34822	12.2247	1.64465	11.2944	0.46377	4.55122	0.703602	16.0504	0.399712	set25	A-B2	untreated	conidium
AN2835	41.9241	13.1636	54.1138	5.95955	33.4681	3.79457	45.7503	3.21599	2.80506	11.375	3.74077	1.72453	1.85146	2.48768	11.8537	0.26977	set25	A-B2	untreated	conidium
AN2836	27.7342	11.4867	46.4242	3.56851	25.6686	3.39957	39.8191	2.09773	6.69995	6.15083	10.1993	0.602239	1.46479	3.46667	12.2268	1.51678	set25	A-B2	untreated	conidium
AN3307	4.56994	2.27926	6.16814	0.997555	0.324889	2.3815	0.802798	1.06828	1.15916	0.712907	5.56099	0.181688	0.155717	1.61691	0.564582	0.427852	set25	A-B2	untreated	conidium
AN3334	570.648	5.17012	540.594	2.10089	808.523	1.97867	594.782	1.03328	46.1955	2.23307	109.089	0.215298	96.1492	0.865047	80.2795	0.402945	set25	A-B2	untreated	conidium
AN3524	7.46868	6.27447	9.34124	2.95281	5.41191	4.55901	10.5622	3.27776	0.857422	2.70571	1.34173	0.519991	0.78366	1.60967	0.453177	0.716464	set25	A-B2	untreated	conidium
AN3555	30.7343	14.2637	22.1915	5.73167	9.61252	17.2559	7.34143	9.72669	2.50737	3.56995	11.3464	0.395754	0.646978	11.1925	1.85463	4.77273	set25	A-B2	untreated	conidium
AN4133	7.74314	4.851	10.6959	2.34989	3.77884	1.61854	6.50282	1.20235	1.11063	1.31206	1.88438	1.13655	1.61653	1.06468	2.08352	0.166662	set25	A-B2	untreated	conidium
AN4704	30.4922	8.11232	40.7212	2.38193	10.576	1.38886	24.5032	1.14683	2.36104	4.62765	15.8774	0.550577	1.45446	1.33807	13.06	0.52066	set25	A-B2	untreated	conidium
AN5081	116.083	16.7568	292.05	8.44162	45.55	11.1202	104.028	9.24398	42.022	5.36667	98.1702	1.72681	20.1651	1.47666	17.8186	1.43246	set25	A-B2	untreated	conidium
AN5086	989.536	8.34315	874.479	2.16931	745.014	3.58489	728.195	1.49468	80.8007	10.0222	266.385	0.617138	57.0848	3.25066	170.854	0.403954	set25	A-B2	untreated	conidium
AN5273	1.30926	1.13469	0.760842	0.13708	0.208857	0.426013	0.366679	0.325952	0.0528357	0.948255	0.603149	0.0564701	0.12413	0.386578	0.221532	0.127867	set25	A-B2	untreated	conidium
AN5411	56.4092	1.75435	41.5641	0.488352	50.261	0.729027	44.8242	0.453052	5.1808	0.287561	6.91303	0.283408	1.37735	0.595015	8.69344	0.199985	set25	A-B2	untreated	conidium
AN5523	679.023	572.419	779.973	270.583	717.208	389.018	610.881	204.303	134.046	36.013	154.232	3.96539	41.3019	300.827	123.08	25.8399	set25	A-B2	untreated	conidium
AN5550	0.890712	0.747307	5.10654	0.231261	0.576757	0.671385	3.3664	0.348302	0.149118	0.15468	0.434081	0.103227	0.134012	0.291904	0.689703	0.18439	set25	A-B2	untreated	conidium
AN5604	367.634	159.507	311.228	53.5164	548.168	64.2904	376.38	42.4462	157.058	37.0553	39.432	5.84093	87.8073	40.7933	82.7842	12.7645	set25	A-B2	untreated	conidium
AN5943	14.2808	8.96124	22.1134	3.44242	4.78966	8.02648	10.1273	4.87747	0.800443	1.97315	4.41575	0.661134	0.525321	5.48865	1.41602	0.970581	set25	A-B2	untreated	conidium
AN6105	62.5099	17.9789	62.0634	3.32024	41.8947	4.98318	54.76	2.51645	1.15778	4.52455	1.2994	1.08311	9.35059	2.04958	5.91017	1.16536	set25	A-B2	untreated	conidium
AN6396	2.81742	2.08442	3.76574	0.920871	2.04143	1.69759	2.261	0.675655	0.857041	0.280912	1.57125	0.210674	0.219975	0.722509	1.20942	0.0275	set25	A-B2	untreated	conidium
AN6437	1.93854	1.08856	2.07039	0.472207	1.44102	0.899063	2.01502	0.356104	0.226778	0.339762	0.83607	0.15748	0.516339	0.328246	0.568847	0.131977	set25	A-B2	untreated	conidium
AN6657	111.303	93.5515	86.2206	31.5434	46.131	29.1976	51.9602	23.0546	17.2999	71.4826	22.6532	2.86274	6.01298	26.003	9.85232	8.33875	set25	A-B2	untreated	conidium
AN6661	4.22897	1.87405	2.44709	0.622761	0.728036	0.491388	0.700301	0.402468	0.347938	0.387466	1.21382	0.150713	0.556943	0.372077	0.297804	0.27124	set25	A-B2	untreated	conidium
AN6744	7.15672	6.4417	7.03514	2.37076	3.31185	2.91195	2.96676	2.44899	0.33758	5.18594	1.4393	0.955056	1.06808	2.11589	0.998599	0.252796	set25	A-B2	untreated	conidium
AN6796	235.539	57.5743	351.768	24.3147	328.867	29.6823	458.008	26.0631	29.725	14.6321	21.2246	2.34138	8.75502	18.2363	11.3657	5.48316	set25	A-B2	untreated	conidium
AN6834	64.3357	9.44801	48.0613	4.13829	13.9786	17.0798	23.0353	9.21128	10.1721	0.54313	13.9966	0.61204	3.64304	4.60485	3.66707	1.53731	set25	A-B2	untreated	conidium
AN6881	229.486	5.75262	192.495	2.63146	104.158	2.87155	86.0191	2.06034	94.7491	1.87111	95.9375	0.874994	11.9989	1.51759	9.70312	0.778929	set25	A-B2	untreated	conidium
AN7011	635.756	338.958	691.386	130.749	558.076	226.872	463.398	100.35	75.11	107.799	117.673	24.6084	72.0692	216.223	203.312	55.1974	set25	A-B2	untreated	conidium
AN7738	22.3899	14.145	17.7539	5.19751	25.9138	13.0707	17.1485	6.22975	6.85006	9.79272	3.719	1.00113	2.63475	1.55856	3.63083	0.424114	set25	A-B2	untreated	conidium
AN8357	39.9623	24.5435	60.3351	8.59838	28.5871	9.51269	32.2606	6.97455	8.73902	1.37417	12.7795	0.899462	6.4512	7.69243	11.9277	3.87246	set25	A-B2	untreated	conidium
AN8358	47.5948	25.4161	69.1153	9.5163	35.679	10.7345	43.9655	8.46739	10.0747	7.0878	13.2848	0.506469	8.09199	9.26587	5.09099	4.70655	set25	A-B2	untreated	conidium
AN8359	1.61662	0.987122	2.18521	0.496436	1.91234	0.531393	2.19435	0.485538	0.334187	0.0777363	0.343087	0.0635187	0.816004	0.381016	0.25929	0.30625	set25	A-B2	untreated	conidium
AN8399	12.3606	2.97026	38.1878	1.44832	5.37261	0.328609	13.939	0.422133	2.60814	0.82437	14.293	0.575566	1.77399	0.330699	4.14443	0.0594813	set25	A-B2	untreated	conidium
AN8469	4.5149	3.35818	6.61398	1.13023	3.02052	1.54499	4.34615	1.21838	0.645477	1.59801	0.466723	0.237211	0.807673	0.777401	1.72986	0.322902	set25	A-B2	untreated	conidium
AN8470	1.76759	0.562412	2.18142	0.103977	1.1166	0.292497	1.62967	0.190111	0.651158	0.606841	0.187048	0.106982	0.193491	0.215234	0.681389	0.0948377	set25	A-B2	untreated	conidium
AN8473	2.97955	2.97978	2.65168	0.580424	1.40935	0.984917	1.22132	0.693514	0.579115	2.5007	0.303396	0.195421	0.521199	0.896707	0.534369	0.142326	set25	A-B2	untreated	conidium
AN8641	1546.75	7.52322	1066.23	3.1409	912.399	6.16649	874.588	3.36243	74.6564	4.11434	189.246	0.359189	133.157	2.31947	202.336	0.445896	set25	A-B2	untreated	conidium
AN8642	174.536	2.58126	158.689	1.19257	182.597	1.81208	140.889	0.78553	48.1439	1.1029	27.8402	0.421046	18.2692	1.56476	26.8057	0.302325	set25	A-B2	untreated	conidium
AN8652	73.797	6.69788	73.3851	2.84204	31.977	2.40838	41.9838	1.87091	5.94425	2.46562	20.6162	0.384141	1.50564	0.905904	11.4409	1.08777	set25	A-B2	untreated	conidium
AN8738	7.34097	6.51141	6.0428	2.89055	2.92541	2.4348	2.81193	2.74735	2.10746	3.57978	2.49701	0.760795	0.897528	1.28632	1.04441	0.573102	set25	A-B2	untreated	conidium
AN8912	3.53375	3.1956	6.00877	0.655053	2.61403	3.02233	2.52981	1.53963	0.383949	2.52656	2.57999	0.199842	1.46849	2.49632	0.581587	1.24116	set25	A-B2	untreated	conidium
AN8988	28.0274	15.11	63.4437	4.8985	32.6626	5.87658	60.7445	5.92814	4.33702	9.5321	14.1441	0.901442	3.63369	3.74773	7.00572	1.00102	set25	A-B2	untreated	conidium
AN8990	134.575	122.122	194.454	38.5256	78.8238	32.5044	110.517	25.9713	34.239	67.9919	67.3818	2.25229	4.19997	28.8807	38.1746	12.6975	set25	A-B2	untreated	conidium
AN8999	0.828965	0.683958	0.797906	0.144379	0.149831	0.266392	0.526702	0.0470322	0.156363	0.152437	0.0808877	0.040122	0.154647	0.153917	0.105606	0.0306713	set25	A-B2	untreated	conidium
AN9007	72.8492	40.4551	52.4921	8.36598	36.9358	22.2735	19.3329	12.6014	12.918	28.6042	29.2406	0.796933	16.1923	12.1713	5.1679	4.05116	set25	A-B2	untreated	conidium
AN9036	1.34121	0.650434	1.09549	0.125143	0.988315	0.170703	0.812827	0.142348	0.365642	0.326845	0.0603176	0.0419583	0.418979	0.143573	0.258015	0.0121932	set25	A-B2	untreated	conidium
AN11378	1166.23	8.34471	914.073	2.49396	574.95	8.21644	358	2.07688	92.3026	3.25991	186.866	0.910442	103.123	3.55751	245.6	0.456022	set25	A-B2	untreated, MSB treated	conidium
AN1918	3641.58	771.126	2470.42	129.12	3190.89	204.693	1898.02	117.083	658.343	449.431	439.038	9.78683	92.9582	171.811	377.831	40.0762	set25	A-B2	untreated, MSB treated	conidium
AN2720	47.5617	4.22288	47.8081	2.15203	42.3241	5.90755	45.654	2.12077	7.15796	1.50354	5.30255	0.728959	4.11365	5.00717	11.4369	0.638104	set25	A-B2	untreated, MSB treated	conidium
AN5015	10871	53.6217	11090.4	10.9247	10640.1	45.7392	10918.3	9.65486	373.115	3.69943	2661.68	2.36737	1246.84	31.1451	420.407	3.80346	set25	A-B2	untreated, MSB treated	conidium
AN8338	25.984	5.34591	26.1755	1.82988	15.9482	3.67235	17.4141	1.44688	0.846801	1.29882	3.82053	0.232994	2.86739	3.45928	4.92385	0.25807	set25	A-B2	untreated, MSB treated	conidium
AN9032	15.4182	7.22438	15.749	2.84258	11.1408	3.76585	13.4418	1.69902	1.46512	0.912275	0.692398	1.08677	1.29641	1.59368	3.0987	0.470739	set25	A-B2	untreated, MSB treated	conidium
AN9241	15.8651	0.614577	10.9863	0.180575	6.29527	0.403121	7.37811	0.0701505	1.57695	0.236714	4.40604	0.104397	0.910516	0.142513	3.35997	0.0420462	set25	A-B2	untreated, MSB treated	conidium
AN9343	6.42845	0.87342	8.6604	0.16171	3.74969	0.838182	6.81134	0.214071	1.48128	0.207269	0.668501	0.151683	0.221239	0.42342	1.79012	0.106791	set25	A-B2	untreated, MSB treated	conidium
AN10293	5.30341	2.64577	6.90034	1.61418	4.26677	1.71526	5.39232	0.79496	0.596802	0.453223	1.21237	0.0451758	0.210741	0.647201	1.69223	0.111347	set25	A-B2	MSB treated	conidium
AN11094	94.8753	150.553	142.927	26.5598	88.7478	61.4891	142.401	13.7394	4.94339	4.11508	14.1784	8.27633	3.69217	61.571	22.9699	6.44081	set25	A-B2	MSB treated	conidium
AN2640	162.623	1.2106	123.097	0.634028	147.808	1.62665	95.0962	0.608458	27.7994	0.70235	30.9985	0.259801	21.292	0.0768329	4.77349	0.22318	set25	A-B2	MSB treated	conidium
AN3776	12.6548	1.46545	27.4129	0.849147	19.4404	10.4012	41.4764	4.58456	0.969583	0.319156	13.2542	0.369584	3.26261	1.49934	7.92164	2.47445	set25	A-B2	MSB treated	conidium
AN9285	16005.4	53.1265	15334.1	90.6478	14791.6	140.391	13950.9	63.3399	3298.94	29.5822	2479.29	3.92686	779.254	75.773	1258.57	12.5461	set25	A-B2	MSB treated	conidium
AN0033	7.59279	9.74475	3.82017	1.98971	5.35538	5.33555	2.94643	2.41743	0.367245	8.30591	0.21203	0.631072	1.77181	3.97157	0.485013	0.300131	set25	A-B3	untreated	conidium
AN10385	14.3721	43.3153	6.85969	4.56723	7.59954	10.8033	3.27658	3.17062	2.32872	7.47616	1.92085	0.827679	4.25496	2.81629	0.261529	1.71548	set25	A-B3	untreated	conidium
AN10761	521.129	562.419	190.491	75.5843	144.291	137.754	84.3759	71.7806	126.146	378.156	67.607	28.0162	12.7963	142.092	25.9971	20.0082	set25	A-B3	untreated	conidium
AN10995	12.0248	12.8958	6.63399	4.23481	6.85019	4.49737	4.57965	5.48519	2.57866	7.03583	0.746091	0.821531	3.47961	1.33998	0.377734	1.96776	set25	A-B3	untreated	conidium
AN0283	5.37608	0.397775	1.7791	0.672989	1.13476	0.686366	2.12456	0.795807	1.09095	0.0914235	0.569478	0.226621	0.391175	0.513935	0.349932	0.513991	set25	A-B4	untreated	conidium
AN0294	675.304	70.3793	335.952	88.1339	278.399	73.1978	224.494	75.3329	111.672	26.1269	93.6427	7.16529	19.8438	7.92914	42.0499	11.9608	set25	A-B4	untreated	conidium
AN0395	11.0339	1.29844	6.29782	0.645537	1.07693	1.2334	3.60017	0.808925	3.95646	0.290395	1.73784	0.12377	0.541127	0.347421	1.05803	0.559583	set25	A-B4	untreated	conidium
AN0467	1239.5	10.3212	415.568	27.1582	167.16	3.80534	123.902	13.7506	518.015	2.63498	204.059	15.3858	8.62252	0.868639	35.2623	8.00895	set25	A-B4	untreated	conidium
AN0468	5426.09	32.9591	1735.05	64.7729	636.786	13.6517	471.484	38.4633	2647.8	4.89687	850.702	36.9331	12.9599	3.1712	203.483	19.9579	set25	A-B4	untreated	conidium
AN0709	804.178	535.21	502.498	299.329	546.323	207.693	342.931	183.94	117.927	86.8447	98.1034	75.9039	10.7443	105.725	100.865	33.4163	set25	A-B4	untreated	conidium
AN10057	46.4469	2.20441	20.1988	6.15465	17.0088	2.56381	14.5097	4.21387	8.9006	0.923	2.38341	4.461	4.36482	1.37667	3.07867	1.50199	set25	A-B4	untreated	conidium
AN1020	134.051	9.51556	80.9726	7.93011	71.3981	10.5581	70.1427	7.88044	25.8058	0.124232	15.9178	0.616589	15.6915	1.30159	12.1818	0.713811	set25	A-B4	untreated	conidium
AN10318	27.0007	15.518	16.6418	9.48861	21.3141	12.2002	14.331	9.72451	2.24633	2.18749	2.16943	1.59949	0.570307	7.9701	3.36891	1.61636	set25	A-B4	untreated	conidium
AN10419	24.8085	0	13.2324	0	7.75962	0.0206161	6.45163	0.07451	3.29515	0	4.35449	0	0.805667	0.0357082	2.38126	0.129055	set25	A-B4	untreated	conidium
AN10581	1226.43	103.817	285.484	114.17	216.14	101.518	145.845	133.893	485.757	6.44987	28.4721	37.3093	50.8538	25.0596	56.5711	7.77072	set25	A-B4	untreated	conidium
AN10658	6.41798	0.413872	1.80585	0.355115	1.36591	0.345087	1.24756	0.276118	1.01407	0.143634	0.480414	0.0179192	0.17754	0.298185	0.379337	0.15405	set25	A-B4	untreated	conidium
AN10703	401.278	191.827	247.374	142.258	325.216	42.827	209.764	93.639	79.7228	162.629	55.3152	29.7774	16.4312	19.4961	17.602	90.4582	set25	A-B4	untreated	conidium
AN10782	166.664	13.6603	103.83	7.35122	165.223	7.12854	132.743	7.34699	8.12608	4.64449	22.5595	2.07447	2.34791	1.57775	22.1277	1.7652	set25	A-B4	untreated	conidium
AN10847	2146.98	480.286	1040.42	242.687	1130.68	184.953	735.545	143.523	747.165	219.492	251.892	17.1215	113.712	116.264	75.0937	40.1053	set25	A-B4	untreated	conidium
AN10977	1774.85	13.2108	916.329	9.51707	359.939	10.3429	447.94	6.7758	835.599	1.77122	311.758	0.928163	6.78399	0.735921	140.498	0.953815	set25	A-B4	untreated	conidium
AN11001	528.796	49.2911	329.573	44.5515	412.802	50.9339	290.526	49.3863	26.4093	6.48485	74.8414	3.75584	12.3113	9.53186	88.3862	4.16318	set25	A-B4	untreated	conidium
AN11105	123.049	0.563807	48.686	0.644918	79.0339	0.918376	39.5795	1.5713	12.7977	0.376712	8.39109	0.0116348	14.8764	0.566694	5.17841	1.16363	set25	A-B4	untreated	conidium
AN11161	552.595	0.652889	267.594	0.408039	372.042	0.619093	190.523	0.35424	38.8351	0.217504	85.1035	0.108442	4.45179	0.422791	45.3325	0.325745	set25	A-B4	untreated	conidium
AN1127	92.4059	37.1315	54.8118	28.6764	67.8402	23.3854	42.0306	23.4964	8.26839	7.2999	8.4795	1.68308	6.01173	6.51836	10.6114	4.05242	set25	A-B4	untreated	conidium
AN11313	38.4613	0.603208	5.15678	0.786742	6.0987	0.476725	2.6039	0.462396	12.9611	0.23619	3.88908	0.576982	1.06201	0.272138	1.71701	0.252557	set25	A-B4	untreated	conidium
AN11456	31.2743	0	14.7107	0	8.80586	0.145482	10.1146	0.247074	11.8057	0	3.98714	0	2.85363	0.0479839	1.61656	0.13495	set25	A-B4	untreated	conidium
AN11789	120.682	45.7932	76.5953	29.2905	70.2576	20.9131	51.2049	19.8731	10.3997	15.3728	15.185	4.97585	4.5181	9.23642	14.0142	5.86282	set25	A-B4	untreated	conidium
AN11949	8.07202	0.074865	1.69091	0.372563	1.13239	0.148607	0.618354	0.100404	0.131159	0.0896816	0.504303	0.429677	0.261107	0.0461592	0.348081	0.0965203	set25	A-B4	untreated	conidium
AN12031	12.9028	1.48419	7.1469	2.16742	7.53382	1.64247	5.23015	1.30279	2.60771	0.45036	2.85729	0.73203	0.283896	0.426474	1.8982	0.552644	set25	A-B4	untreated	conidium
AN12035	107.742	3.88116	54.7491	3.36264	48.7404	2.5864	32.0891	2.00134	21.5047	0.242035	20.5616	0.383189	9.85652	0.202365	10.956	0.364367	set25	A-B4	untreated	conidium
AN12085	567.276	21.7724	215.228	13.7002	157.754	6.76402	120.01	7.4473	207.364	16.1175	62.084	3.53602	8.10127	2.01096	13.3605	2.26986	set25	A-B4	untreated	conidium
AN12130	190.516	0.112061	108.763	0.0912481	114.742	0.142195	87.5329	0.159625	22.6209	0.100703	15.6759	0.0887562	6.18743	0.185389	14.5055	0.152982	set25	A-B4	untreated	conidium
AN12149	36.6115	18.9047	21.3095	13.7502	14.848	12.4994	14.3762	18.9974	10.6283	12.2106	4.22412	2.35887	1.31296	1.31398	2.94557	2.70159	set25	A-B4	untreated	conidium
AN12198	2568	44.6937	1534.32	35.5952	1885.9	35.3715	1466.7	34.874	339.969	23.6483	202.545	1.67858	108.648	9.36055	103.067	6.39883	set25	A-B4	untreated	conidium
AN12426	826.674	34.7594	317.319	42.5227	282.952	34.461	250.855	38.5164	114.461	10.3217	53.2131	14.4138	52.7513	5.82069	103.579	7.49394	set25	A-B4	untreated	conidium
AN12458	3.08251	0.470101	1.68132	0.861352	2.44456	0.713887	1.73711	0.599315	0.493343	0.249724	0.156236	0.19517	0.943929	0.362565	0.512072	0.0723	set25	A-B4	untreated	conidium
AN1279	31.2433	7.44851	17.3185	7.34722	15.6806	7.09491	8.85231	10.2606	3.71171	0.941435	5.66721	0.994851	3.48911	2.83058	1.97884	1.62769	set25	A-B4	untreated	conidium
AN1767	55.2549	20.1483	28.4471	18.6716	50.2503	15.5291	22.8203	15.9814	9.7482	2.87583	4.45	0.848441	1.144	4.88779	3.59174	1.81619	set25	A-B4	untreated	conidium
AN1814	24.1119	12.1951	13.6441	8.22194	5.53133	8.57847	8.5449	10.0227	7.41164	0.879103	5.04911	3.51452	1.24344	3.71739	1.33845	0.742061	set25	A-B4	untreated	conidium
AN2025	8.3655	1.06791	3.36961	0.802267	1.60702	1.29846	1.13522	0.693584	0.844696	0.199962	0.410042	0.13685	0.256693	0.708267	0.848047	0.439063	set25	A-B4	untreated	conidium
AN2042	117.85	56.1347	59.9838	35.524	129.144	60.4453	64.1913	43.1851	11.641	9.64739	5.56784	1.99239	23.5301	3.27553	5.03961	3.03062	set25	A-B4	untreated	conidium
AN2242	38.9116	4.61204	22.0687	10.9526	14.1183	4.24771	13.557	6.16588	13.8182	0.357615	4.86801	7.00699	2.02887	1.32112	3.74882	1.62994	set25	A-B4	untreated	conidium
AN2404	3992.32	7.01069	1837.52	6.05709	3360.46	5.70105	1896.15	3.99411	143.545	2.0195	163.053	4.5248	180.424	3.99824	294.647	3.77883	set25	A-B4	untreated	conidium
AN2465	10.2487	2.82541	4.48935	1.91264	1.79694	1.86624	2.12328	1.84809	2.918	1.56777	2.47002	0.0694044	0.695796	0.766138	0.619552	0.485365	set25	A-B4	untreated	conidium
AN2475	955.635	2.71027	477.627	3.21325	1013.6	3.0223	596.454	2.89797	217.555	0.822101	181.176	0.51039	22.3611	1.74017	197.546	0.223939	set25	A-B4	untreated	conidium
AN2613	11.7627	0.712631	6.11497	2.10606	2.21175	0.571323	4.71388	0.911973	2.52553	0.271288	1.81497	0.408001	0.42096	0.0643206	0.713298	0.20199	set25	A-B4	untreated	conidium
AN2672	2.60172	0.30151	0.477105	0.256111	1.97319	0.13856	0.285815	0.19699	0.224776	0.218684	0.0473794	0.0386303	0.408427	0.0254216	0.180248	0.0690169	set25	A-B4	untreated	conidium
AN2728	2.38887	0.280825	1.13777	0.112115	4.6645	0.546868	2.77614	0.509592	0.897366	0.110167	0.485615	0.104607	1.74945	0.238779	0.808303	0.390473	set25	A-B4	untreated	conidium
AN2792	83.4877	0	35.8905	0.126559	35.6196	0.106622	24.242	0.115456	12.1036	0	11.611	0.0570541	5.2885	0.094326	7.72735	0.0870806	set25	A-B4	untreated	conidium
AN3078	9.43802	1.6406	5.51833	1.43677	3.85417	1.36068	3.08712	1.07949	1.07082	0.490365	2.37802	0.498178	0.694957	0.391635	0.780356	0.296752	set25	A-B4	untreated	conidium
AN3211	8.96154	3.88709	5.68139	3.31923	2.91346	2.50017	2.08238	2.55035	0.83128	2.77571	1.67872	0.795918	0.105333	0.265786	1.35757	0.120032	set25	A-B4	untreated	conidium
AN3314	297.695	0.592137	190.933	1.59159	93.8267	0.885805	95.8495	0.618937	36.0724	0.160559	83.248	0.726283	9.11231	0.374842	56.8662	0.350193	set25	A-B4	untreated	conidium
AN3434	97.8023	52.0695	50.2655	34.6688	56.609	31.5694	31.9821	31.7751	28.9028	3.72579	17.4239	0.428252	6.51621	8.00024	7.87308	5.75046	set25	A-B4	untreated	conidium
AN3513	2.66628	1.29964	1.6213	0.909202	2.66556	1.23256	1.26279	0.959379	0.370765	0.0608826	0.592739	0.136305	0.285348	0.37534	0.191889	0.0261566	set25	A-B4	untreated	conidium
AN3523	196.366	0.129984	105.098	0.281535	150.812	0.190842	110.23	0.189043	30.8918	0.0742128	2.67627	0.171546	21.9523	0.0965439	21.6463	0.153604	set25	A-B4	untreated	conidium
AN3573	14.8884	4.82633	6.69655	3.90954	3.58935	6.5217	2.69408	6.37818	0.92817	1.68693	1.66921	0.477094	0.925602	2.05912	0.653321	1.52011	set25	A-B4	untreated	conidium
AN3782	77.0546	0.187879	46.921	0.774259	50.4588	0.614778	32.4091	0.835512	16.2873	0.145976	13.7048	0.328631	7.98235	0.470784	1.53226	0.393865	set25	A-B4	untreated	conidium
AN3872	183.693	5.83333	63.1781	4.29321	22.2034	2.5618	19.4123	2.96236	46.8869	1.47447	26.1045	0.749612	3.78512	1.97516	7.24878	0.381667	set25	A-B4	untreated	conidium
AN3970	9.90815	2.57788	4.01167	1.64705	4.4445	2.05047	3.40382	3.44877	1.20323	1.72305	0.487074	0.434915	0.817118	0.61063	0.413155	0.808527	set25	A-B4	untreated	conidium
AN3997	18.617	1.22369	9.25417	4.16287	1.51612	0.529037	2.14212	1.11375	7.21216	0.461342	5.02192	2.54445	0.515262	0.0529217	2.39296	0.0929591	set25	A-B4	untreated	conidium
AN4104	82.868	8.38152	46.1262	6.29518	43.3009	4.8194	26.762	6.38996	15.2116	4.61405	8.12247	0.984371	12.0991	0.788895	7.07122	0.43223	set25	A-B4	untreated	conidium
AN4154	120.434	15.9457	69.6057	15.7663	65.6995	16.0873	46.6467	14.4622	11.7362	3.06071	24.2379	2.23385	8.07507	1.50256	9.83591	2.98407	set25	A-B4	untreated	conidium
AN4155	3.11575	0.185099	1.42592	0.245609	0.622343	0.0722636	0.426751	0.174649	0.33267	0.18728	0.704067	0.111022	0.216998	0.0870888	0.0668824	0.0811123	set25	A-B4	untreated	conidium
AN4208	83.1344	36.3898	52.592	19.7444	42.9996	26.311	33.4049	20.437	10.2259	12.5983	17.974	0.990395	3.02936	7.90163	10.5632	4.17858	set25	A-B4	untreated	conidium
AN4256	356.147	116.272	225.08	87.1143	369.388	61.9137	223.092	55.4816	38.0076	39.9665	14.609	2.09662	69.0441	1.07487	20.205	16.2718	set25	A-B4	untreated	conidium
AN4352	241.328	32.0178	146.322	47.9441	180.687	44.9713	128.237	50.0055	38.7189	2.36382	6.92443	1.72114	7.8736	0.699826	21.1817	9.62394	set25	A-B4	untreated	conidium
AN4711	322.286	88.3625	154.613	80.5736	128.536	66.9155	115.724	60.1151	44.2155	7.83029	26.2583	5.8214	6.53711	15.6249	24.3562	9.42625	set25	A-B4	untreated	conidium
AN4911	514.836	99.0769	268.615	87.6595	252.609	67.1615	214.589	65.0484	60.4196	26.8556	49.5901	11.1379	27.3051	25.5134	37.6614	24.8788	set25	A-B4	untreated	conidium
AN5004	2217.66	17.7972	1330.01	23.4441	1708.38	20.8518	1113.29	23.2388	435.089	2.69629	255.601	2.57895	54.3726	9.391	54.7148	7.56882	set25	A-B4	untreated	conidium
AN5018	1.12404	0.0459841	0.489011	0.121102	0.818497	0.502701	0.464841	0.361724	0.358218	0.0796469	0.148274	0.0612908	0.243159	0.268564	0.0745311	0.32974	set25	A-B4	untreated	conidium
AN5207	114.23	20.5969	49.3601	29.9647	79.0935	28.6157	45.0337	30.5848	28.0936	3.22783	13.02	3.17123	10.2891	3.59058	5.03284	1.45286	set25	A-B4	untreated	conidium
AN5217	3038.32	218.449	1876.19	307.523	2811.1	399.346	1866.3	354.453	97.0889	55.8608	401.844	30.7516	337.8	49.7319	171.089	40.0265	set25	A-B4	untreated	conidium
AN5292	8.41951	0.0231757	2.13997	0.296447	1.85372	0.429457	1.68862	0.341693	0.351785	0.0401416	0.758768	0.261041	0.435288	0.308208	0.441068	0.262011	set25	A-B4	untreated	conidium
AN5339	73.2968	3.94921	38.7326	2.87549	37.3406	2.30833	25.4301	2.33535	12.6334	0.758585	7.1494	0.304339	4.99115	0.501193	4.55033	0.240047	set25	A-B4	untreated	conidium
AN5480	3649.41	113.826	2166.73	106.183	2904.91	76.0151	2105.49	83.2481	817.014	19.1436	234.125	11.6185	270.533	20.1001	205.402	6.02025	set25	A-B4	untreated	conidium
AN5634	1446.83	127.513	885.018	84.7924	1044.87	124.966	702.548	82.1474	136.902	9.28316	105.169	15.0386	21.9293	31.1556	100.048	6.75032	set25	A-B4	untreated	conidium
AN5768	225.962	27.5485	125.984	33.3989	142.616	37.7329	114.375	43.7151	5.94161	1.85431	15.3472	9.84017	18.865	12.5276	33.5124	14.8165	set25	A-B4	untreated	conidium
AN6087	102.965	44.2003	61.276	43.5117	91.8079	47.5045	68.5457	39.9788	3.47564	7.017	4.98476	8.22221	6.72358	5.3293	4.70948	4.35668	set25	A-B4	untreated	conidium
AN6404	24.3333	0.0273462	2.70436	0.463055	0.499891	0.136287	0.640809	0.600964	9.30176	0.047365	1.49962	0.388104	0.1301	0.236056	0.612126	0.563436	set25	A-B4	untreated	conidium
AN6441	119.04	19.9802	75.317	16.9154	56.9656	8.55868	56.7328	9.44149	6.29207	5.52866	12.6904	1.95573	8.60633	2.29008	22.28	1.20083	set25	A-B4	untreated	conidium
AN6811	3.51236	0.0671579	1.3491	0.0334105	0.742277	0.0411111	0.817618	0.0384399	0.879223	0.0324635	0.750133	0.0578687	0.569634	0.0390183	0.274887	0.0355532	set25	A-B4	untreated	conidium
AN6996	135.506	45.9699	82.6623	45.2665	76.0337	40.8589	69.6756	36.2157	7.15328	4.29371	16.0285	5.65032	4.1202	9.12879	17.4788	6.44844	set25	A-B4	untreated	conidium
AN7138	84.383	41.2899	55.743	21.5071	20.856	20.8206	24.9323	13.9001	4.75828	16.0205	25.3843	1.91866	3.14345	18.97	5.65157	6.09294	set25	A-B4	untreated	conidium
AN7139	190.916	14.0189	93.2464	11.1185	48.5976	4.23068	31.7562	5.68613	39.7542	9.11225	33.1852	1.20392	3.99235	3.23266	12.94	1.15136	set25	A-B4	untreated	conidium
AN7166	1102.21	421.356	517.211	353.232	621.703	337.436	313.826	332.912	311.265	37.1215	129.966	56.6541	166.795	32.7253	15.0508	99.4543	set25	A-B4	untreated	conidium
AN7298	134.627	42.0431	63.0359	33.8776	97.0245	39.2644	49.871	50.1301	9.61982	17.8158	7.17124	6.39213	5.21698	8.44063	8.33322	10.8802	set25	A-B4	untreated	conidium
AN7341	423.649	105.305	203.473	99.7407	151.461	34.6961	116.148	41.8992	16.6682	17.7013	64.1147	8.42354	12.2633	4.63733	51.383	6.9463	set25	A-B4	untreated	conidium
AN7618	5.1308	0.387653	3.12708	0.975749	2.97239	0.380707	1.74498	0.377213	0.730738	0.101699	0.885609	0.42191	0.353396	0.164731	1.02067	0.0957836	set25	A-B4	untreated	conidium
AN7640	200.3	42.3102	126.973	76.0372	203.146	94.8495	157.836	71.7317	21.2372	13.4955	20.359	8.37259	14.2988	37.6575	13.6226	9.43573	set25	A-B4	untreated	conidium
AN7892	511.283	113.155	190.816	112.138	122.251	213.718	75.0013	99.7728	125.231	33.1564	140.106	14.0379	35.8745	117.608	32.9036	15.6698	set25	A-B4	untreated	conidium
AN7989	674.044	9.42249	350.68	5.19459	363.035	3.88684	234.891	3.50925	56.0965	0.808853	68.7733	1.53439	41.3969	4.5937	47.1089	2.56392	set25	A-B4	untreated	conidium
AN8051	82.8689	20.126	41.7888	24.6491	48.6218	22.7027	28.4409	19.4469	23.9354	1.25789	10.2412	1.84702	3.38235	3.98863	7.02146	1.98185	set25	A-B4	untreated	conidium
AN8138	19.9464	3.36902	10.9439	1.93612	8.14034	6.419	7.20383	3.6138	5.21147	1.79278	3.81915	0.0970275	2.79518	2.2942	1.50527	0.328492	set25	A-B4	untreated	conidium
AN8534	108.353	21.9181	49.5636	13.0267	75.6925	12.046	56.2056	13.4941	3.31614	0.830382	9.40711	2.22222	8.25894	5.40401	7.11378	2.8914	set25	A-B4	untreated	conidium
AN8581	14.5013	0.0167673	5.78984	0.0124431	15.5702	0.0177107	10.5672	0.0308864	3.43269	0.0290418	2.35858	0.0215521	1.97881	0.0306758	3.10018	0.0296011	set25	A-B4	untreated	conidium
AN8584	29.4229	0.363365	6.29493	1.54574	0.454369	0.243866	0.840512	0.193371	17.7173	0.307689	5.33157	1.32029	0.096075	0.282943	1.45581	0.168389	set25	A-B4	untreated	conidium
AN9002	1258.25	0.513123	633.608	0.682824	1303.69	1.21866	679.695	0.499677	164.675	0.20017	177.928	0.12635	203.272	1.22237	98.7461	0.364787	set25	A-B4	untreated	conidium
AN9025	48.3696	18.8644	28.8549	12.6816	23.145	17.6171	19.5574	15.2539	2.90488	9.60954	6.13788	1.63041	3.23108	1.11232	6.42217	1.19794	set25	A-B4	untreated	conidium
AN9038	225.233	0.0848472	112.622	0.135761	139.691	0.250715	86.1206	0.117154	22.5012	0.04301	20.1711	0.0590422	4.09529	0.257306	21.4543	0.0707419	set25	A-B4	untreated	conidium
AN9130	107.459	22.1734	64.7418	14.2481	66.2901	14.659	46.7329	18.043	7.24176	1.95439	4.82218	2.68589	16.2607	0.619	10.0446	7.13895	set25	A-B4	untreated	conidium
AN9189	3.83103	0.370751	2.36888	0.448197	2.47218	0.906387	2.63071	0.688805	0.53627	0.231826	0.0388407	0.169284	0.264739	0.170436	0.529658	0.297576	set25	A-B4	untreated	conidium
AN9330	24.59	2.27123	15.3741	1.43461	11.6451	1.67665	11.8411	1.147	2.3936	0.145064	2.70729	0.0932249	1.08203	0.228167	1.15713	0.408077	set25	A-B4	untreated	conidium
AN9389	3.68856	1.39703	2.41142	1.05734	0.892422	0.755671	1.11484	1.31226	1.03542	1.36787	1.34466	0.140327	0.0763323	0.386549	0.572576	0.856048	set25	A-B4	untreated	conidium
tA(AGC)5	49.8228	24.0085	31.5139	16.4888	21.9863	14.3558	19.9995	13.173	9.46883	4.24782	7.48562	2.26556	5.43476	2.19606	10.1074	2.30885	set25	A-B4	untreated	conidium
AN0020	87.5691	1.78864	31.3596	1.75549	71.0794	3.02884	21.4407	4.01883	16.0786	0.522713	10.9827	0.794946	16.586	1.15814	1.96247	3.13064	set25	A-B4	untreated, MSB treated	conidium
AN0314	447.854	92.3699	168.191	62.2894	195.426	69.7499	103.675	58.1134	22.4392	4.59918	59.7982	3.83907	25.7073	22.547	33.003	2.90007	set25	A-B4	untreated, MSB treated	conidium
AN0400	1651.78	0.812302	606.342	0.562859	1889.14	1.53382	612.905	0.637959	184.821	0.464672	174.694	0.191711	524.857	1.83648	64.5137	0.416035	set25	A-B4	untreated, MSB treated	conidium
AN10197	313.588	11.7297	143.443	17.1228	317.405	9.89135	183.075	14.3573	14.8059	0.691558	21.4217	6.20605	17.5589	2.04079	10.8381	4.32263	set25	A-B4	untreated, MSB treated	conidium
AN10332	31.5372	0.295533	8.04618	0.408813	11.28	0.572671	6.17326	0.608621	1.19025	0.0590323	2.93248	0.188321	2.77194	0.0435373	1.3857	0.107673	set25	A-B4	untreated, MSB treated	conidium
AN10678	639.09	2.79896	259.647	4.79755	322.995	2.61536	170.475	2.66495	59.915	0.212541	55.2026	2.44176	27.8504	1.05681	49.0722	0.391219	set25	A-B4	untreated, MSB treated	conidium
AN10683	103.521	4.50764	45.6164	4.41239	50.833	5.68112	28.5583	5.46613	20.3316	1.19398	24.4125	0.842557	0.751569	1.13471	13.3617	0.649133	set25	A-B4	untreated, MSB treated	conidium
AN11016	370.972	0.307636	183.637	0.272786	158.053	0.269533	99.8152	0.234576	42.3582	0.0836321	72.4227	0.079101	11.7181	0.139743	39.4436	0.226991	set25	A-B4	untreated, MSB treated	conidium
AN11108	103.838	0.0969262	43.2983	0.208219	71.6766	0.0982248	35.4055	0.0853127	13.9673	0.0697836	9.81124	0.108597	7.70441	0.0596799	7.26532	0.0811462	set25	A-B4	untreated, MSB treated	conidium
AN11337	2146.82	2.03177	1067.55	2.87248	2003.99	2.64082	962.139	2.25804	156.281	0.56311	167.554	0.729238	262.187	1.91817	200.817	0.67285	set25	A-B4	untreated, MSB treated	conidium
AN11477	6488.67	12.8405	3214.71	17.6753	7318.99	11.8248	1952.76	19.841	439.252	10.2357	2704.65	6.03558	2243.68	9.47256	878.903	11.809	set25	A-B4	untreated, MSB treated	conidium
AN11533	2755.34	1.6791	1479.28	2.38903	3130.08	1.66045	1033.86	1.93074	40.531	0.0663156	313.61	1.37175	750.634	1.63632	194.124	0.68673	set25	A-B4	untreated, MSB treated	conidium
AN11705	4599.37	1345.82	1976.51	867.185	3002.11	888.953	1537.37	835.637	1466.41	154.6	405.385	126.501	924.593	265.677	391.393	45.7905	set25	A-B4	untreated, MSB treated	conidium
AN12038	114.373	0	0.626832	0.0679139	107.837	0	0.827091	0	3.09199	0	0.213405	0.11763	22.4212	0	0.392802	0	set25	A-B4	untreated, MSB treated	conidium
AN12039	47.6217	0.337011	13.0464	0.251584	71.2842	0.271924	19.0868	0.0724404	10.4224	0.323731	4.84248	0.0735549	10.7593	0.125139	1.05729	0.0694258	set25	A-B4	untreated, MSB treated	conidium
AN12102	79.4356	3.62713	21.6789	3.63647	25.1212	2.16133	12.2988	3.26653	11.2051	0.714844	2.30755	0.128503	9.00084	0.887424	6.41777	1.76215	set25	A-B4	untreated, MSB treated	conidium
AN12216	83.557	39.4836	50.6553	34.8626	67.5443	30.0432	38.2699	24.4136	10.6995	4.78661	9.15609	1.75702	12.3891	4.93114	4.81592	4.39744	set25	A-B4	untreated, MSB treated	conidium
AN1651	242.686	4.44247	118.241	4.74155	130.526	0.674525	64.2525	0.582486	28.2253	0.696583	40.2114	4.26946	18.4556	0.531565	28.9446	0.1523	set25	A-B4	untreated, MSB treated	conidium
AN2221	326.176	1.55429	143.171	1.44362	344.654	1.79998	125.921	1.90567	21.1202	0.617943	11.5932	0.958899	42.5618	0.354534	22.5326	0.58175	set25	A-B4	untreated, MSB treated	conidium
AN2472	550.471	3.04092	248.99	3.87422	421.514	2.15568	184.796	2.56705	173.894	1.13671	78.5742	0.807952	121.191	0.79688	17.8688	0.309933	set25	A-B4	untreated, MSB treated	conidium
AN2615	41.6333	6.71512	13.1162	3.73875	22.2376	5.42383	8.03352	3.9548	2.50504	3.19901	3.22347	0.561295	2.4939	3.52708	2.0933	1.00054	set25	A-B4	untreated, MSB treated	conidium
AN2638	233.87	0.344009	85.0655	0.208287	199.057	0.194994	79.7707	0.0798231	48.2501	0.188691	21.6438	0.140664	13.8457	0.175235	14.7754	0.138258	set25	A-B4	untreated, MSB treated	conidium
AN2822	264.4	1.21003	107.634	2.83975	203.567	1.90576	100.957	1.8307	24.4326	0.403185	25.0144	0.146359	5.26451	0.381396	17.2997	0.0367261	set25	A-B4	untreated, MSB treated	conidium
AN2838	112.67	0.1555	19.986	0.786165	93.5788	0.733042	22.1047	0.931945	10.769	0.0469173	4.57635	0.610768	15.6016	0.453186	4.25565	0.246879	set25	A-B4	untreated, MSB treated	conidium
AN3305	514.866	0.0798904	216.732	0.260112	550.874	0.410333	216.298	0.263366	74.0218	0.10356	32.8343	0.228699	145.282	0.494515	21.8573	0.134054	set25	A-B4	untreated, MSB treated	conidium
AN3321	14.2014	0.658686	1.00131	0.380408	8.86422	1.43373	1.50763	0.947101	1.20233	0.409045	0.440739	0.15872	0.656764	0.157922	0.504898	0.227471	set25	A-B4	untreated, MSB treated	conidium
AN3433	979.213	177.489	476.275	125.296	771.28	98.1943	389.711	103.175	81.0932	25.4142	74.8052	21.6387	31.5698	18.2011	62.7458	10.2314	set25	A-B4	untreated, MSB treated	conidium
AN3474	227.161	8.06374	55.9446	12.5141	275.037	12.9617	70.8134	17.8418	16.058	1.33532	13.9666	1.3323	29.5454	6.41368	4.34304	8.75974	set25	A-B4	untreated, MSB treated	conidium
AN3480	1086.24	7.92297	481.879	8.17979	945.759	16.7615	461.685	13.7994	73.547	0.97829	8.66861	0.560596	19.963	8.98622	99.2598	6.76526	set25	A-B4	untreated, MSB treated	conidium
AN3512	1724.49	0.810416	550.317	0.698542	1186.51	1.28284	444.348	0.793513	325.724	0.361919	151.361	0.315035	271.969	0.544211	17.8876	0.35332	set25	A-B4	untreated, MSB treated	conidium
AN3679	803.366	9.30205	498.617	9.27189	850.775	8.44103	432.896	7.87079	85.3838	1.07671	113.776	1.27145	94.8289	1.17283	39.5036	1.16939	set25	A-B4	untreated, MSB treated	conidium
AN3966	256.385	0.13432	10.0794	0.0520825	124.947	0.0794815	6.06286	0.0582288	3.7391	0.130724	5.51076	0.0488532	31.8134	0.0754355	1.58928	0.100855	set25	A-B4	untreated, MSB treated	conidium
AN3967	435.784	0.134368	238.744	0.184174	357.977	0.322804	197.404	0.0893924	116.484	0.0331885	44.9205	0.249173	105.768	0.122868	18.5458	0.154832	set25	A-B4	untreated, MSB treated	conidium
AN3968	638.256	0.0767053	141.291	0	557.478	0.474171	147.122	0.0915617	84.4202	0.0746518	37.98	0	107.515	0.455455	19.3699	0.0877514	set25	A-B4	untreated, MSB treated	conidium
AN4105	153.391	14.8567	81.3687	11.171	131.823	8.66928	55.5069	12.2127	48.3618	6.08477	20.6253	1.81727	27.5019	0.260419	0.438366	2.35112	set25	A-B4	untreated, MSB treated	conidium
AN4176	6.2127	2.02777	2.98797	1.58006	7.39249	1.13957	3.53465	1.241	1.53865	0.182844	0.588069	0.340098	0.664742	0.133921	0.373114	0.234895	set25	A-B4	untreated, MSB treated	conidium
AN4177	205.575	2.83436	68.6703	1.55915	233.908	1.38158	88.9439	1.53282	11.1254	0.56902	7.73866	0.562403	22.1833	0.568983	5.51413	0.152929	set25	A-B4	untreated, MSB treated	conidium
AN5017	264.565	0.196579	86.3348	0.601339	131.269	0.180317	44.0601	0.636057	105.445	0.122492	33.4687	0.436603	9.24875	0.0924731	7.26081	0.514709	set25	A-B4	untreated, MSB treated	conidium
AN5325	268.34	0.937516	5.71086	1.5085	222.032	1.20328	4.69279	1.61683	34.2606	0.33824	1.53346	0.203961	34.6979	0.481576	0.531012	0.640799	set25	A-B4	untreated, MSB treated	conidium
AN5326	27.4767	0.158668	0.499959	0.147347	13.65	0.155601	0.322486	0.0822887	4.65726	0.0870307	0.0437136	0.0863123	2.94636	0.120336	0.166751	0.0259098	set25	A-B4	untreated, MSB treated	conidium
AN5409	16.1078	0.212769	5.57276	0.477041	27.4059	0.280404	9.37896	0.4385	3.10239	0.298038	1.77845	0.023397	0.809951	0.0819777	2.41968	0.210106	set25	A-B4	untreated, MSB treated	conidium
AN5654	291.916	0.314199	57.7409	0.261039	252.042	0.619829	49.9785	0.457789	32.8023	0.145328	11.8784	0.25391	18.1423	0.0272347	12.0471	0.181822	set25	A-B4	untreated, MSB treated	conidium
AN6633	3222.83	14.0344	1330.73	13.4923	926.861	15.1	543.028	12.5605	721.363	1.19089	561.293	1.25931	94.3181	2.77832	297.166	1.78824	set25	A-B4	untreated, MSB treated	conidium
AN7280	22.5481	0.454775	7.92212	0.275079	23.6277	0.233526	5.7961	0.189016	3.58229	0.280281	1.73769	0.0436903	1.28722	0.0327371	1.84428	0.058434	set25	A-B4	untreated, MSB treated	conidium
AN7287	790.372	18.7767	420.839	14.3344	759.641	20.5293	351.856	16.8699	83.0247	6.21746	76.1505	0.517789	58.5859	2.5862	90.9723	0.426678	set25	A-B4	untreated, MSB treated	conidium
AN7796	39.0486	0.0700899	6.95306	0.0665741	27.2799	0.109506	9.18202	0.116233	7.57459	0.0629856	0.581901	0.058699	1.45331	0.0625113	2.61324	0.127946	set25	A-B4	untreated, MSB treated	conidium
AN7797	37.5123	0.0520857	8.97163	0.0741725	25.9572	0	10.2818	0.0479725	3.46135	0.0902151	2.10674	0.0644071	2.14486	0	2.87259	0.0459761	set25	A-B4	untreated, MSB treated	conidium
AN7798	34.7316	0.17764	12.921	0.113817	26.4295	0.270088	14.9943	0.173049	1.7809	0.154296	3.06607	0.0744368	1.19058	0.165886	2.23985	0.116925	set25	A-B4	untreated, MSB treated	conidium
AN8122	458.18	11.284	173.817	8.91242	356.635	9.80117	142.922	7.34706	72.8121	0.509956	36.6125	1.13018	9.37113	0.649363	45.7689	0.480668	set25	A-B4	untreated, MSB treated	conidium
AN8328	41.7634	0.415629	15.9032	0.80979	16.9965	0.160404	7.83119	0.123313	4.8907	0.15428	6.29072	0.377551	0.693523	0.0728166	4.51505	0.0459991	set25	A-B4	untreated, MSB treated	conidium
AN8329	23.0414	0.214704	9.80421	0.121	9.53752	0.112075	4.29163	0.15135	3.90271	0.104304	2.92933	0.0746952	1.27832	0.119824	1.90109	0.0762688	set25	A-B4	untreated, MSB treated	conidium
AN8335	261.068	0.991763	53.3382	0.835652	201.39	0.948757	47.8105	0.269741	19.1308	0.73062	2.67481	0.349976	17.3548	0.271074	10.8238	0.12577	set25	A-B4	untreated, MSB treated	conidium
AN8336	2.65384	0.0201471	0.489737	0.0849194	1.77835	0	0.38417	0	0.651479	0.0348958	0.0834242	0.0355602	0.0767798	0	0.072241	0	set25	A-B4	untreated, MSB treated	conidium
AN8397	59.8904	0.225316	20.8079	0.50336	30.5384	0.351973	11.7092	0.209242	0.629701	0.0679822	4.64952	0.479159	2.29131	0.399562	2.24707	0.280108	set25	A-B4	untreated, MSB treated	conidium
AN8398	318.333	0.477781	148.031	0.36671	209.615	0.426986	91.2429	0.312032	16.6225	0.138421	28.6642	0.184497	20.2715	0.136669	30.263	0.234843	set25	A-B4	untreated, MSB treated	conidium
AN8449	21.307	0.110919	11.2965	0.0950067	12.7521	0.135119	5.4371	0.101624	2.06415	0.0180315	6.51638	0.0541972	5.49702	0.0268695	1.30551	0.0716403	set25	A-B4	untreated, MSB treated	conidium
AN8553	2811.59	13.2162	1085.47	26.8112	2983.3	19.0006	1064.59	26.6814	340.363	0.726505	75.1995	0.791078	231.959	4.40976	221.391	9.42834	set25	A-B4	untreated, MSB treated	conidium
AN8554	5.21581	0.172809	1.71666	0.326686	11.7831	0.292326	3.15616	0.532642	1.74035	0.101724	0.475942	0.196857	3.54949	0.140344	0.766316	0.117363	set25	A-B4	untreated, MSB treated	conidium
AN8587	37.1901	0.0484118	19.2374	0.0847725	47.2803	0.0761516	29.8776	0.0618121	8.76496	0.0420334	7.23154	0.0382163	7.52004	0.0992844	7.78112	0.0745513	set25	A-B4	untreated, MSB treated	conidium
AN9194	2228.76	3.30142	831.46	7.94721	2948.59	4.71941	1125.22	5.23433	299.741	1.20035	94.122	2.20147	237.141	1.51115	91.488	2.44521	set25	A-B4	untreated, MSB treated	conidium
AN9370	149.299	3.07883	46.5873	3.86346	70.3658	2.75531	30.6732	3.46677	21.7977	0.982522	16.64	0.432207	4.92584	0.734048	9.21375	0.698119	set25	A-B4	untreated, MSB treated	conidium
AN0599	165.799	9.19655	189.66	10.1733	245.621	10.4182	144.989	9.05241	37.8097	2.73701	66.9804	1.50492	16.4298	0.618722	24.2189	2.17175	set25	A-B4	MSB treated	conidium
AN0758	170.435	4.33769	116.244	2.47528	146.239	3.90505	83.4429	2.32299	43.0135	1.17957	19.5994	0.0963603	19.7866	2.10053	24.4107	0.480472	set25	A-B4	MSB treated	conidium
AN1059	270.035	35.6454	174.816	55.6712	238.089	43.4735	143.694	57.3911	48.708	4.95926	27.1382	8.53964	5.29919	10.8004	17.6819	5.64172	set25	A-B4	MSB treated	conidium
AN1066	728.091	724.876	415.037	299.744	861.079	157.578	444.573	129.926	86.7312	250.534	89.0938	52.4588	102.39	56.2483	28.9343	25.8992	set25	A-B4	MSB treated	conidium
AN11039	531.981	17.3794	391.94	16.9914	690.694	12.8269	382	12.7976	35.6894	1.21571	62.3189	0.601373	97.6352	3.46102	29.923	0.723094	set25	A-B4	MSB treated	conidium
AN12257	2.09016	0.199224	0.656007	0.62365	3.50854	0.188775	0.958062	0.290989	0.837157	0.243047	0.254591	0.363894	0.94279	0.167174	0.231425	0.317047	set25	A-B4	MSB treated	conidium
AN1792	0.843878	0.206368	0.664969	0.739022	1.99515	0.484713	0.83988	0.34496	0.221522	0.0728642	0.504567	0.185462	0.923471	0.165758	0.182179	0.183058	set25	A-B4	MSB treated	conidium
AN1891	71.5955	27.5297	49.2402	22.8565	66.9304	15.5589	34.5187	16.3503	11.5994	4.6847	19.4441	4.86492	22.3108	2.36901	2.48587	2.53312	set25	A-B4	MSB treated	conidium
AN2800	140.201	0.314096	99.0522	0.15247	149.059	0.315967	81.5248	0.270395	52.2568	0.301718	13.9366	0.110542	10.9405	0.18177	27.5743	0.131215	set25	A-B4	MSB treated	conidium
AN2815	704.209	344.251	475.088	345.673	862.308	318.444	507.683	297.655	116.7	21.3555	117.019	85.8044	21.0945	58.5365	116.685	58.208	set25	A-B4	MSB treated	conidium
AN3425	289.804	63.1331	211.624	46.0427	248.556	46.5914	152.711	41.8811	14.5459	8.28628	41.735	0.07141	17.3868	11.5566	35.9123	5.62759	set25	A-B4	MSB treated	conidium
AN4421	263.466	1.47374	188.302	2.52258	297.138	2.08368	172.483	2.19381	46.6861	0.425445	31.3313	0.689487	12.1484	0.899127	24.5572	0.291436	set25	A-B4	MSB treated	conidium
AN4627	4.84428	0.213121	3.0022	0.589157	7.59677	0.682348	2.66299	1.19167	0.955043	0.15344	0.789901	0.178502	0.635815	0.550877	0.860243	1.0642	set25	A-B4	MSB treated	conidium
AN4977	103.113	40.5881	68.6304	44.5895	119.761	45.8998	67.6935	42.5854	19.4774	3.98911	1.58265	0.821875	14.9634	5.3989	9.25377	3.07244	set25	A-B4	MSB treated	conidium
AN5110	146.079	18.7202	99.7582	18.3156	154.501	14.4953	90.5675	16.3536	31.3001	4.01914	14.6174	1.02144	22.2627	1.81304	14.5034	1.15389	set25	A-B4	MSB treated	conidium
AN5231	234.911	30.817	157.012	41.8171	341.921	76.9194	210.297	72.4675	20.4641	7.65467	28.4138	4.65818	48.4918	36.5996	57.4086	15.6127	set25	A-B4	MSB treated	conidium
AN5308	85.1384	2.86602	57.7924	1.94891	75.4599	2.66508	42.9662	2.18825	3.74131	0.396723	14.4813	0.388652	1.84448	1.41477	10.5086	0.769779	set25	A-B4	MSB treated	conidium
AN5404	944.553	181.702	645.163	217.37	923.045	165.256	553.695	185.297	141.934	20.8541	68.7832	11.9352	35.5179	6.92634	131.525	8.09688	set25	A-B4	MSB treated	conidium
AN5653	21.1598	5.15615	7.43233	5.29612	24.4021	6.26692	8.87742	5.90765	3.73937	0.143404	1.76984	0.914271	4.48929	1.1065	0.525206	2.73467	set25	A-B4	MSB treated	conidium
AN7234	2.7922	0.0914586	1.00982	0.933029	2.04075	0.136093	0.58029	0.0985299	0.211156	0.107557	0.481173	0.790154	0.188057	0.235719	0.122068	0.0310235	set25	A-B4	MSB treated	conidium
AN8018	504.098	2.92737	363.067	2.42703	363.965	2.62605	214.916	2.25526	74.1982	0.324839	139.705	0.19584	43.5678	0.841834	62.9715	0.407919	set25	A-B4	MSB treated	conidium
AN8026	2.55666	2.20471	3.38629	1.74923	9.31997	2.93954	4.93072	2.34271	0.260139	0.984667	0.432136	0.364083	2.75252	0.776819	1.0627	0.890041	set25	A-B4	MSB treated	conidium
AN8086	46.1348	19.8331	41.7942	20.6441	48.9478	8.96158	28.5845	15.1921	8.44239	2.84405	3.66375	1.50309	12.3002	1.42602	3.76116	7.80807	set25	A-B4	MSB treated	conidium
AN9035	42.8608	1.02189	30.0753	0.938137	32.135	2.32165	18.9218	1.27265	1.02413	0.466713	0.885587	0.0964772	3.81991	0.36338	8.87964	0.475068	set25	A-B4	MSB treated	conidium
AN9074	212.56	16.0362	141.34	11.4003	234.18	14.4214	122.426	7.89521	26.2225	0.285054	33.9802	0.752211	29.4072	3.60681	24.8443	2.31108	set25	A-B4	MSB treated	conidium
AN9283	0.745419	0.0542346	0.763274	0.0161191	2.39966	0.0893973	1.14087	0.027032	0.700905	0.0232081	0.283854	0.0151196	0.241295	0.0405975	0.623353	0.0468207	set25	A-B4	MSB treated	conidium
