# Supplementary material for: Genome-Wide Gene Expression Analyses of the AtfA/AtfB-Mediated Menadione Stress Response in Aspergillus nidulans
Source: Cells. 2023 Jan 31;12(3):463. doi: 10.3390/cells12030463 (PMC9913763; doi:10.3390/cells12030463)
Supplement: Supplementary file 1 [file cells-12-00463-s001.zip › Table S3 Enrichment.xlsx]

## Sheet: AtfA untr myc
Table S3	Results of the gene set enrichment analyses for AtfA- and AtfB dependent genes.
Sheet 1	AtfA-dependent genes (Set26)	untreated cultures		mycelium
FunCat ID	FunCat description	FunCat main category	Gene ID(s)	Exact p-value	Adjusted p-value	# genes / category	# genes / input
1.05	C-compound and carbohydrate metabolism	Metabolism	ANIA_01312 | ANIA_02314 | ANIA_02470 | ANIA_02549 | ANIA_02835 | ANIA_03305 | ANIA_03883 | ANIA_04888 | ANIA_04913 | ANIA_05017 | ANIA_05550 | ANIA_05984 | ANIA_06274 | ANIA_06398 | ANIA_06952 | ANIA_07267 | ANIA_07590 | ANIA_07624 | ANIA_07797 | ANIA_08330 | ANIA_08561 | ANIA_08639 | ANIA_08642 | ANIA_08953 | ANIA_08964 | ANIA_09002 | ANIA_09179 | ANIA_09180 | ANIA_09183 | ANIA_09284 | ANIA_0929…	0.000272809	0.0396246	39 / 922	39 / 331
01.20.17.09	metabolism of alkaloids	Metabolism	ANIA_05550 | ANIA_06274 | ANIA_08964 | ANIA_09178 | ANIA_10392	0.000352219	0.0396246	5 / 26	5 / 331
GO ID	GO name	GO namespace	Gene ID(s)	Exact p-value	Adjusted p-value	# genes / category	# genes / input
GO:0004557	alpha-galactosidase activity	MF	AN7624 | AN8138	0.000574845	0.018395	2 / 4	2 / 331
GO:0052692	raffinose alpha-galactosidase activity	MF	AN7624 | AN8138	0.000574845	0.018395	2 / 4	2 / 331
GO:0019521	D-gluconate metabolic process	BP	AN10233 | AN8637	0.000953022	0.0203311	2 / 5	2 / 331
GO:0006012	galactose metabolic process	BP	AN7624 | AN8138	0.00142199	0.0227519	2 / 6	2 / 331
GO:0003824	catalytic activity	MF	AN7624 | AN8138 | AN2314 | AN4888	0.00247027	0.0316195	4 / 64	4 / 331
GO:0050177	phenylpyruvate decarboxylase activity	MF	AN4888	0.0105125	0.0420499	1 / 1	1 / 331
GO:0030976	thiamine pyrophosphate binding	MF	AN4888	0.0105125	0.0420499	1 / 1	1 / 331
GO:0047453	ATP-dependent NAD(P)H-hydrate dehydratase activity	MF	AN5994	0.0105125	0.0420499	1 / 1	1 / 331
GO:0004737	pyruvate decarboxylase activity	MF	AN4888	0.0105125	0.0420499	1 / 1	1 / 331
GO:0046496	nicotinamide nucleotide metabolic process	BP	AN5994	0.0105125	0.0420499	1 / 1	1 / 331
GO:0043169	cation binding	MF	AN2314	0.0105125	0.0420499	1 / 1	1 / 331
GO:0005948	acetolactate synthase complex	CC	AN4888	0.0105125	0.0420499	1 / 1	1 / 331
GO:0003984	acetolactate synthase activity	MF	AN4888	0.0105125	0.0420499	1 / 1	1 / 331
GO:0070085	glycosylation	BP	AN8138	0.0105125	0.0420499	1 / 1	1 / 331
GO:0004616	phosphogluconate dehydrogenase (decarboxylating) activity	MF	AN10233	0.0105125	0.0420499	1 / 1	1 / 331
GO:0003844	1,4-alpha-glucan branching enzyme activity	MF	AN2314	0.0105125	0.0420499	1 / 1	1 / 331

## Sheet: AtfA MSB myc
Table S5	Results of the gene set enrichment analyses for AtfA- and AtfB dependent genes.
Sheet 2	AtfA-dependent genes (Set26)	MSB treated cultures		mycelium
FunCat ID	FunCat description	FunCat main category	Gene ID(s)	Exact p-value	Adjusted p-value	# genes / category	# genes / input
20.01.11	amine / polyamine transport	Cellular transport, transport facilitation and transport routes	ANIA_00418 | ANIA_02287 | ANIA_02822 | ANIA_03304 | ANIA_05540 | ANIA_05968 | ANIA_07955 | ANIA_08990	2.28447e-05	0.00525429	8 / 64	8 / 241

## Sheet: AtfA untr con
Table S5	Results of the gene set enrichment analyses for AtfA- and AtfB dependent genes.
Sheet 3	AtfA-dependent genes (Set26)	untreated cultures		conidium
FunCat ID	FunCat description	FunCat main category	Gene ID(s)	Exact p-value	Adjusted p-value	# genes / category	# genes / input
1.05	C-compound and carbohydrate metabolism	Metabolism	ANIA_00240 | ANIA_00554 | ANIA_00599 | ANIA_00741 | ANIA_00758 | ANIA_00775 | ANIA_00886 | ANIA_00887 | ANIA_01059 | ANIA_01246 | ANIA_01257 | ANIA_01300 | ANIA_01396 | ANIA_01547 | ANIA_01616 | ANIA_01617 | ANIA_01715 | ANIA_01726 | ANIA_01734 | ANIA_01787 | ANIA_01865 | ANIA_01918 | ANIA_01990 | ANIA_02037 | ANIA_02314 | ANIA_02320 | ANIA_02351 | ANIA_02359 | ANIA_02393 | ANIA_02402 | ANIA_0247…	2.10159e-12	9.772394e-10	187 / 922	187 / 1495
02.16.01	alcohol fermentation	Energy	ANIA_00554 | ANIA_02470 | ANIA_02860 | ANIA_03573 | ANIA_03741 | ANIA_03873 | ANIA_04126 | ANIA_04888 | ANIA_05178 | ANIA_05234 | ANIA_05355 | ANIA_06439 | ANIA_07500 | ANIA_07636 | ANIA_08336 | ANIA_08628 | ANIA_09366 | ANIA_10358 | ANIA_10660 | ANIA_10703	3.618986e-8	8.41414e-06	20 / 42	20 / 1495
01.05.02.07	sugar, glucoside, polyol and carboxylate catabolism	Metabolism	ANIA_00240 | ANIA_00599 | ANIA_00741 | ANIA_01246 | ANIA_01396 | ANIA_01602 | ANIA_01642 | ANIA_01715 | ANIA_02314 | ANIA_02402 | ANIA_02463 | ANIA_02515 | ANIA_02533 | ANIA_02583 | ANIA_02612 | ANIA_02633 | ANIA_02801 | ANIA_02867 | ANIA_02875 | ANIA_03200 | ANIA_03223 | ANIA_03307 | ANIA_03308 | ANIA_03358 | ANIA_03679 | ANIA_05017 | ANIA_05144 | ANIA_05262 | ANIA_05333 | ANIA_05523 | ANIA_0552…	6.302097e-8	9.76825e-06	60 / 236	60 / 1495
20.03.02.03.01	proton driven antiporter	Cellular transport, transport facilitation and transport routes	ANIA_00201 | ANIA_00471 | ANIA_01290 | ANIA_01691 | ANIA_02531 | ANIA_02613 | ANIA_03888 | ANIA_05226 | ANIA_07295 | ANIA_07390 | ANIA_07466 | ANIA_07796 | ANIA_08077 | ANIA_08122 | ANIA_08621 | ANIA_10013 | ANIA_11120	1.33072e-05	0.00154697	17 / 44	17 / 1495
20.03.02.02	symporter	Cellular transport, transport facilitation and transport routes	ANIA_00870 | ANIA_02977 | ANIA_03781 | ANIA_04478 | ANIA_04482 | ANIA_08956 | ANIA_08966 | ANIA_10343 | ANIA_10782 | ANIA_11011	1.86867e-05	0.00173787	10 / 18	10 / 1495
01.05.02.04	sugar, glucoside, polyol and carboxylate anabolism	Metabolism	ANIA_00240 | ANIA_00599 | ANIA_01246 | ANIA_01715 | ANIA_02402 | ANIA_02583 | ANIA_02867 | ANIA_03223 | ANIA_05017 | ANIA_05144 | ANIA_05523 | ANIA_05525 | ANIA_05571 | ANIA_05604 | ANIA_05635 | ANIA_06182 | ANIA_07521 | ANIA_07588 | ANIA_07590 | ANIA_08041 | ANIA_08275 | ANIA_08639 | ANIA_08792 | ANIA_09148 | ANIA_09180 | ANIA_10533	6.78847e-05	0.00464668	26 / 93	26 / 1495
2.01	glycolysis and gluconeogenesis	Energy	ANIA_00887 | ANIA_01246 | ANIA_01396 | ANIA_01726 | ANIA_01918 | ANIA_02583 | ANIA_02638 | ANIA_02860 | ANIA_02867 | ANIA_02875 | ANIA_03059 | ANIA_03223 | ANIA_03741 | ANIA_05144 | ANIA_05355 | ANIA_05571 | ANIA_05604 | ANIA_05634 | ANIA_06653 | ANIA_06900 | ANIA_08041 | ANIA_08628 | ANIA_09148 | ANIA_10358 | ANIA_11094	6.995e-05	0.00464668	25 / 88	25 / 1495
20.03.02.02.02	sodium driven symporter	Cellular transport, transport facilitation and transport routes	ANIA_03781 | ANIA_04266 | ANIA_04478 | ANIA_08956 | ANIA_08966 | ANIA_10343 | ANIA_11011	0.000114088	0.00583711	7 / 11	7 / 1495
34.01.03.03	homeostasis of phosphate	Interaction with the environment	ANIA_00870 | ANIA_02977 | ANIA_03781 | ANIA_08956 | ANIA_10343 | ANIA_10782 | ANIA_11011	0.000114088	0.00583711	7 / 11	7 / 1495
1.2	secondary metabolism	Metabolism	ANIA_00015 | ANIA_00018 | ANIA_00201 | ANIA_00459 | ANIA_00610 | ANIA_00758 | ANIA_00768 | ANIA_00771 | ANIA_00775 | ANIA_00856 | ANIA_00886 | ANIA_01109 | ANIA_01243 | ANIA_01292 | ANIA_01300 | ANIA_01577 | ANIA_01594 | ANIA_01596 | ANIA_01597 | ANIA_01616 | ANIA_01617 | ANIA_01680 | ANIA_01691 | ANIA_01737 | ANIA_01787 | ANIA_01794 | ANIA_01808 | ANIA_01882 | ANIA_02410 | ANIA_02475 | ANIA_0251…	0.000125529	0.00583711	175 / 1071	175 / 1495
20.01.01.07.07	phosphate transport	Cellular transport, transport facilitation and transport routes	ANIA_00870 | ANIA_02977 | ANIA_03781 | ANIA_05935 | ANIA_06254 | ANIA_08956 | ANIA_10343 | ANIA_10782 | ANIA_11011	0.000146678	0.00620046	9 / 18	9 / 1495
32.01.01	oxidative stress response	Cell rescue, defense and virulence	ANIA_01247 | ANIA_01932 | ANIA_01986 | ANIA_02530 | ANIA_02823 | ANIA_03555 | ANIA_03829 | ANIA_03952 | ANIA_03973 | ANIA_04171 | ANIA_04174 | ANIA_04215 | ANIA_04329 | ANIA_05577 | ANIA_05607 | ANIA_05671 | ANIA_05781 | ANIA_07461 | ANIA_07567 | ANIA_07892 | ANIA_08553 | ANIA_08583 | ANIA_08637 | ANIA_10507	0.000195124	0.00756107	24 / 88	24 / 1495
20.01.03	C-compound and carbohydrate transport	Cellular transport, transport facilitation and transport routes	ANIA_00178 | ANIA_00856 | ANIA_01059 | ANIA_01109 | ANIA_01269 | ANIA_01577 | ANIA_01738 | ANIA_01865 | ANIA_01930 | ANIA_02289 | ANIA_02465 | ANIA_02475 | ANIA_02544 | ANIA_02663 | ANIA_02822 | ANIA_02974 | ANIA_03105 | ANIA_03199 | ANIA_03204 | ANIA_03210 | ANIA_03232 | ANIA_03515 | ANIA_03997 | ANIA_04277 | ANIA_04482 | ANIA_04621 | ANIA_05226 | ANIA_05323 | ANIA_05943 | ANIA_06087 | ANIA_0625…	0.00023242	0.00831347	56 / 276	56 / 1495
2.16	fermentation	Energy	ANIA_00599 | ANIA_01616 | ANIA_01617 | ANIA_01642 | ANIA_02470 | ANIA_02860 | ANIA_04126 | ANIA_04831 | ANIA_05178 | ANIA_05355 | ANIA_05563 | ANIA_07193 | ANIA_07632 | ANIA_08356 | ANIA_10499 | ANIA_10671	0.000321347	0.0106733	16 / 50	16 / 1495
16.21.07	NAD/NADP binding	Protein with binding function or cofactor requirement (structural or analytic)	ANIA_00554 | ANIA_00599 | ANIA_00775 | ANIA_02042 | ANIA_02393 | ANIA_02583 | ANIA_02704 | ANIA_03229 | ANIA_03564 | ANIA_03829 | ANIA_03954 | ANIA_04126 | ANIA_05109 | ANIA_05178 | ANIA_05200 | ANIA_05234 | ANIA_05338 | ANIA_05435 | ANIA_05563 | ANIA_06274 | ANIA_06403 | ANIA_06445 | ANIA_06792 | ANIA_06933 | ANIA_07193 | ANIA_07194 | ANIA_07199 | ANIA_07230 | ANIA_07461 | ANIA_07600 | ANIA_0770…	0.000381562	0.0118284	44 / 207	44 / 1495
32.07.05	detoxification by export	Cell rescue, defense and virulence	ANIA_00018 | ANIA_00201 | ANIA_00771 | ANIA_01243 | ANIA_01691 | ANIA_02531 | ANIA_02613 | ANIA_03041 | ANIA_03231 | ANIA_03301 | ANIA_03888 | ANIA_03952 | ANIA_05856 | ANIA_06436 | ANIA_06581 | ANIA_07225 | ANIA_07295 | ANIA_07390 | ANIA_07466 | ANIA_07779 | ANIA_07790 | ANIA_07796 | ANIA_08077 | ANIA_08083 | ANIA_08122 | ANIA_08340 | ANIA_08621 | ANIA_09370 | ANIA_09382 | ANIA_10013 | ANIA_1108…	0.000491624	0.0142878	32 / 138	32 / 1495
34.11	cellular sensing and response to external stimulus	Interaction with the environment	ANIA_02289 | ANIA_02581 | ANIA_03101 | ANIA_03305 | ANIA_04113 | ANIA_04266 | ANIA_05653 | ANIA_06820 | ANIA_07321 | ANIA_07945 | ANIA_08603 | ANIA_08812 | ANIA_10494 | ANIA_10902	0.000802681	0.0219557	14 / 44	14 / 1495
32.07	detoxification	Cell rescue, defense and virulence	ANIA_00771 | ANIA_01089 | ANIA_01243 | ANIA_01423 | ANIA_01691 | ANIA_01795 | ANIA_01986 | ANIA_02558 | ANIA_02593 | ANIA_02798 | ANIA_03231 | ANIA_03301 | ANIA_03488 | ANIA_03741 | ANIA_03952 | ANIA_03973 | ANIA_04215 | ANIA_05260 | ANIA_05400 | ANIA_05577 | ANIA_05856 | ANIA_06457 | ANIA_06742 | ANIA_06750 | ANIA_07199 | ANIA_07295 | ANIA_07390 | ANIA_07466 | ANIA_07567 | ANIA_07632 | ANIA_0777…	0.000889372	0.0229755	44 / 215	44 / 1495
01.05.11	aromate metabolism	Metabolism	ANIA_00293 | ANIA_00325 | ANIA_03524 | ANIA_05123 | ANIA_08642	0.0013664	0.0334407	5 / 8	5 / 1495
02.07.01	pentose-phosphate pathway oxidative branch	Energy	ANIA_00285 | ANIA_03954 | ANIA_10233	0.00209567	0.0487243	3 / 3	3 / 1495
GO ID	GO name	GO namespace	Gene ID(s)	Exact p-value	Adjusted p-value	# genes / category	# genes / input
GO:0003824	catalytic activity	MF	AN5634 | AN6653 | AN8138 | AN9035 | AN2314 | AN5626 | AN1896 | AN4159 | AN2284 | AN0887 | AN0886 | AN1778 | AN4888 | AN6395 | AN4770 | AN6900 | AN5523 | AN5635 | AN8209	2.77086e-06	0.00104738	19 / 64	19 / 1498
KEGG pathway ID	KEGG pathway name	KEGG main category	Gene ID(s)	Exact p-value	Adjusted p-value	# genes / category	# genes / input
10	Glycolysis / Gluconeogenesis	Metabolism	AN0554.2 | AN1246.2 | AN1918.2 | AN2583.2 | AN2638.2 | AN2860.2 | AN2867.2 | AN2875.2 | AN3059.2 | AN3223.2 | AN4888.2 | AN5604.2 | AN5626.2 | AN6900.2 | AN7632.2 | AN8041.2 | AN8689.2	2.760001e-9	2.290801e-7	17 / 38	17 / 1495
1200	Carbon metabolism	Metabolism	AN0240.2 | AN0285.2 | AN1246.2 | AN1918.2 | AN2583.2 | AN2638.2 | AN2875.2 | AN3059.2 | AN3223.2 | AN3641.2 | AN3954.2 | AN4577.2 | AN4914.2 | AN5525.2 | AN5571.2 | AN5604.2 | AN5626.2 | AN5634.2 | AN6653.2 | AN6900.2 | AN6933.2 | AN7588.2 | AN7632.2 | AN8041.2 | AN8275.2 | AN8689.2 | AN8709.2	5.913234e-9	2.453992e-7	27 / 94	27 / 1495
1110	Biosynthesis of secondary metabolites	Metabolism	AN0240.2 | AN0285.2 | AN0554.2 | AN1246.2 | AN1715.2 | AN1726.2 | AN1778.2 | AN1891.2 | AN1918.2 | AN2314.2 | AN2541.2 | AN2583.2 | AN2638.2 | AN2728.2 | AN2799.2 | AN2860.2 | AN2867.2 | AN2875.2 | AN3059.2 | AN3223.2 | AN3641.2 | AN3954.2 | AN4154.2 | AN4888.2 | AN5273.2 | AN5525.2 | AN5571.2 | AN5604.2 | AN5626.2 | AN5749.2 | AN6182.2 | AN6403.2 | AN6900.2 | AN7278.2 | AN7588.2 | AN7632.2 | AN8…	1.11676e-05	0.00030897	45 / 282	45 / 1495
30	Pentose phosphate pathway	Metabolism	AN0240.2 | AN0285.2 | AN2867.2 | AN2875.2 | AN3223.2 | AN3641.2 | AN3954.2 | AN5604.2 | AN7588.2	4.70334e-05	0.000975943	9 / 22	9 / 1495
1100	Metabolic pathways	Metabolism	AN0174.2 | AN0240.2 | AN0285.2 | AN0554.2 | AN1246.2 | AN1624.2 | AN1715.2 | AN1726.2 | AN1778.2 | AN1891.2 | AN1896.2 | AN1918.2 | AN1990.2 | AN2154.2 | AN2284.2 | AN2314.2 | AN2359.2 | AN2508.2 | AN2583.2 | AN2638.2 | AN2728.2 | AN2799.2 | AN2860.2 | AN2867.2 | AN2875.2 | AN3059.2 | AN3223.2 | AN3641.2 | AN3829.2 | AN3954.2 | AN4154.2 | AN4159.2 | AN4770.2 | AN4781.2 | AN4888.2 | AN4914.2 | AN5…	0.000275356	0.00457092	79 / 669	79 / 1495
630	Glyoxylate and dicarboxylate metabolism	Metabolism	AN4159.2 | AN4577.2 | AN5525.2 | AN5634.2 | AN6653.2 | AN8275.2 | AN8553.2 | AN8637.2	0.000904549	0.0098607	8 / 25	8 / 1495
51	Fructose and mannose metabolism	Metabolism	AN1715.2 | AN2638.2 | AN2875.2 | AN3223.2 | AN5144.2 | AN5604.2 | AN6900.2 | AN8689.2	0.000904549	0.0098607	8 / 25	8 / 1495
620	Pyruvate metabolism	Metabolism	AN0554.2 | AN1547.2 | AN1918.2 | AN1990.2 | AN4174.2 | AN4914.2 | AN5626.2 | AN6653.2 | AN6933.2	0.000950429	0.0098607	9 / 31	9 / 1495
680	Methane metabolism	Metabolism	AN2875.2 | AN3059.2 | AN3223.2 | AN4914.2 | AN5604.2 | AN5626.2 | AN7632.2	0.00146868	0.0135445	7 / 21	7 / 1495

## Sheet: AtfA MSB con
Table S5	Results of the gene set enrichment analyses for AtfA- and AtfB dependent genes.
Sheet 4	AtfA-dependent genes (Set26)	MSB treated cultures		conidium
FunCat ID	FunCat description	FunCat main category	Gene ID(s)	Exact p-value	Adjusted p-value	# genes / category	# genes / input
1.05	C-compound and carbohydrate metabolism	Metabolism	ANIA_00240 | ANIA_00517 | ANIA_00599 | ANIA_00741 | ANIA_00758 | ANIA_00775 | ANIA_00886 | ANIA_00887 | ANIA_01059 | ANIA_01246 | ANIA_01257 | ANIA_01274 | ANIA_01300 | ANIA_01396 | ANIA_01547 | ANIA_01616 | ANIA_01617 | ANIA_01715 | ANIA_01734 | ANIA_01798 | ANIA_01918 | ANIA_02320 | ANIA_02332 | ANIA_02393 | ANIA_02402 | ANIA_02470 | ANIA_02478 | ANIA_02479 | ANIA_02515 | ANIA_02638 | ANIA_0279…	3.740648e-11	1.608479e-8	148 / 922	148 / 1143
01.05.02.07	sugar, glucoside, polyol and carboxylate catabolism	Metabolism	ANIA_00240 | ANIA_00599 | ANIA_00741 | ANIA_01246 | ANIA_01274 | ANIA_01396 | ANIA_01602 | ANIA_01715 | ANIA_02332 | ANIA_02402 | ANIA_02463 | ANIA_02515 | ANIA_02612 | ANIA_02633 | ANIA_02801 | ANIA_02834 | ANIA_02867 | ANIA_02875 | ANIA_03200 | ANIA_03223 | ANIA_03308 | ANIA_03358 | ANIA_03679 | ANIA_05017 | ANIA_05144 | ANIA_05262 | ANIA_05333 | ANIA_05523 | ANIA_05525 | ANIA_05563 | ANIA_0557…	1.048036e-9	2.253277e-7	54 / 236	54 / 1143
01.05.02.04	sugar, glucoside, polyol and carboxylate anabolism	Metabolism	ANIA_00240 | ANIA_00599 | ANIA_01246 | ANIA_01715 | ANIA_02332 | ANIA_02402 | ANIA_02867 | ANIA_03223 | ANIA_05017 | ANIA_05144 | ANIA_05523 | ANIA_05525 | ANIA_05571 | ANIA_05604 | ANIA_05635 | ANIA_07521 | ANIA_07588 | ANIA_07590 | ANIA_08041 | ANIA_08275 | ANIA_08639 | ANIA_08792 | ANIA_08793 | ANIA_09148 | ANIA_09180 | ANIA_10533	4.521263e-7	6.48048e-05	26 / 93	26 / 1143
34.01.03.03	homeostasis of phosphate	Interaction with the environment	ANIA_00870 | ANIA_01612 | ANIA_02977 | ANIA_03781 | ANIA_08956 | ANIA_10343 | ANIA_10782 | ANIA_11011	9.985686e-7	0.000107346	8 / 11	8 / 1143
20.01.01.07.07	phosphate transport	Cellular transport, transport facilitation and transport routes	ANIA_00870 | ANIA_01612 | ANIA_02977 | ANIA_03781 | ANIA_05935 | ANIA_06254 | ANIA_08956 | ANIA_10343 | ANIA_10782 | ANIA_11011	1.55085e-06	0.000133373	10 / 18	10 / 1143
2.01	glycolysis and gluconeogenesis	Energy	ANIA_00887 | ANIA_01246 | ANIA_01396 | ANIA_01918 | ANIA_02638 | ANIA_02867 | ANIA_02875 | ANIA_03059 | ANIA_03223 | ANIA_05144 | ANIA_05355 | ANIA_05571 | ANIA_05604 | ANIA_05634 | ANIA_06653 | ANIA_06900 | ANIA_08041 | ANIA_08628 | ANIA_09148 | ANIA_11009 | ANIA_11094	7.90567e-05	0.00566573	21 / 88	21 / 1143
20.03.02.02	symporter	Cellular transport, transport facilitation and transport routes	ANIA_00870 | ANIA_02977 | ANIA_03781 | ANIA_04482 | ANIA_08956 | ANIA_10343 | ANIA_10782 | ANIA_11011	0.000142	0.00872284	8 / 18	8 / 1143
16.21.07	NAD/NADP binding	Protein with binding function or cofactor requirement (structural or analytic)	ANIA_00599 | ANIA_00775 | ANIA_01274 | ANIA_02042 | ANIA_02393 | ANIA_02684 | ANIA_02999 | ANIA_03229 | ANIA_03829 | ANIA_03954 | ANIA_05109 | ANIA_05200 | ANIA_05338 | ANIA_05435 | ANIA_05563 | ANIA_06274 | ANIA_06403 | ANIA_06792 | ANIA_06933 | ANIA_07193 | ANIA_07194 | ANIA_07461 | ANIA_07600 | ANIA_07708 | ANIA_08041 | ANIA_08329 | ANIA_08398 | ANIA_08449 | ANIA_08553 | ANIA_09053 | ANIA_0917…	0.000179705	0.00965913	37 / 207	37 / 1143
34.11	cellular sensing and response to external stimulus	Interaction with the environment	ANIA_02289 | ANIA_02581 | ANIA_03101 | ANIA_03305 | ANIA_04113 | ANIA_05653 | ANIA_06820 | ANIA_07945 | ANIA_08603 | ANIA_08812 | ANIA_10494 | ANIA_10902	0.000756764	0.0361565	12 / 44	12 / 1143
02.07.01	pentose-phosphate pathway oxidative branch	Energy	ANIA_00285 | ANIA_03954 | ANIA_10233	0.000926658	0.0398463	3 / 3	3 / 1143
GO ID	GO name	GO namespace	Gene ID(s)	Exact p-value	Adjusted p-value	# genes / category	# genes / input
GO:0003824	catalytic activity	MF	AN5634 | AN6653 | AN8138 | AN9035 | AN2815 | AN4159 | AN0887 | AN0886 | AN1778 | AN4888 | AN6395 | AN4770 | AN6900 | AN5523 | AN5635 | AN8209	1.07661e-05	0.0034021	16 / 64	16 / 1145
GO:0006096	glycolytic process	BP	AN1918 | AN8041 | AN0887 | AN1246 | AN6900	0.000276853	0.0437428	5 / 9	5 / 1145
KEGG pathway ID	KEGG pathway name	KEGG main category	Gene ID(s)	Exact p-value	Adjusted p-value	# genes / category	# genes / input
1200	Carbon metabolism	Metabolism	AN0240.2 | AN0285.2 | AN1246.2 | AN1918.2 | AN2332.2 | AN2638.2 | AN2875.2 | AN2999.2 | AN3059.2 | AN3223.2 | AN3954.2 | AN4577.2 | AN4914.2 | AN5525.2 | AN5571.2 | AN5604.2 | AN5634.2 | AN6525.2 | AN6653.2 | AN6900.2 | AN6933.2 | AN7588.2 | AN7632.2 | AN8041.2 | AN8275.2 | AN8689.2 | AN8793.2	8.828498e-12	6.356519e-10	27 / 94	27 / 1143
10	Glycolysis / Gluconeogenesis	Metabolism	AN1246.2 | AN1918.2 | AN2638.2 | AN2867.2 | AN2875.2 | AN3059.2 | AN3223.2 | AN4888.2 | AN5604.2 | AN6900.2 | AN7632.2 | AN8041.2 | AN8689.2	4.226185e-7	1.52143e-05	13 / 38	13 / 1143
630	Glyoxylate and dicarboxylate metabolism	Metabolism	AN4159.2 | AN4577.2 | AN5525.2 | AN5634.2 | AN6525.2 | AN6653.2 | AN8275.2 | AN8553.2 | AN8637.2	1.83243e-05	0.000329838	9 / 25	9 / 1143
51	Fructose and mannose metabolism	Metabolism	AN1715.2 | AN2638.2 | AN2815.2 | AN2875.2 | AN3223.2 | AN5144.2 | AN5604.2 | AN6900.2 | AN8689.2	1.83243e-05	0.000329838	9 / 25	9 / 1143
30	Pentose phosphate pathway	Metabolism	AN0240.2 | AN0285.2 | AN2867.2 | AN2875.2 | AN3223.2 | AN3954.2 | AN5604.2 | AN7588.2	5.10536e-05	0.000735171	8 / 22	8 / 1143
1100	Metabolic pathways	Metabolism	AN0174.2 | AN0240.2 | AN0285.2 | AN0664.2 | AN1246.2 | AN1624.2 | AN1713.2 | AN1715.2 | AN1778.2 | AN1891.2 | AN1918.2 | AN2332.2 | AN2508.2 | AN2638.2 | AN2728.2 | AN2867.2 | AN2875.2 | AN2999.2 | AN3059.2 | AN3223.2 | AN3829.2 | AN3954.2 | AN4154.2 | AN4159.2 | AN4770.2 | AN4781.2 | AN4888.2 | AN4914.2 | AN5200.2 | AN5523.2 | AN5525.2 | AN5571.2 | AN5589.2 | AN5604.2 | AN5634.2 | AN5635.2 | AN6…	6.7453e-05	0.000809436	65 / 669	65 / 1143
1110	Biosynthesis of secondary metabolites	Metabolism	AN0240.2 | AN0285.2 | AN1246.2 | AN1715.2 | AN1778.2 | AN1891.2 | AN1918.2 | AN2332.2 | AN2541.2 | AN2638.2 | AN2728.2 | AN2867.2 | AN2875.2 | AN2999.2 | AN3059.2 | AN3223.2 | AN3954.2 | AN4154.2 | AN4888.2 | AN5525.2 | AN5571.2 | AN5604.2 | AN6403.2 | AN6652.2 | AN6900.2 | AN7278.2 | AN7588.2 | AN7632.2 | AN8041.2 | AN8275.2 | AN8553.2 | AN8637.2 | AN8689.2 | AN8793.2 | AN9148.2	9.46603e-05	0.000973648	35 / 282	35 / 1143
680	Methane metabolism	Metabolism	AN2875.2 | AN3059.2 | AN3223.2 | AN4914.2 | AN5604.2 | AN6525.2 | AN7632.2	0.000292414	0.00263172	7 / 21	7 / 1143
20	Citrate cycle (TCA cycle)	Metabolism	AN1918.2 | AN2332.2 | AN2999.2 | AN5525.2 | AN5571.2 | AN8275.2 | AN8793.2	0.00124343	0.00994746	7 / 26	7 / 1143
4146	Peroxisome	Cellular Processes	AN0174.2 | AN1059.2 | AN1483.2 | AN2999.2 | AN5577.2 | AN6279.2 | AN8553.2 | AN8637.2	0.00435929	0.0313869	8 / 40	8 / 1143
565	Ether lipid metabolism	Metabolism	AN1713.2 | AN4154.2 | AN6211.2 | AN6712.2	0.0065624	0.0429539	4 / 12	4 / 1143

## Sheet: AtfB untr myc
Table S5	Results of the gene set enrichment analyses for AtfA- and AtfB dependent genes.
Sheet 5	AtfB-dependent genes (Set27)	untreated cultures		mycelium
GO ID	GO name	GO namespace	Gene ID(s)	Exact p-value	Adjusted p-value	# genes / category	# genes / input
GO:0046496	nicotinamide nucleotide metabolic process	BP	AN5994	0.00262812	0.0175208	1 / 1	1 / 98
GO:0047453	ATP-dependent NAD(P)H-hydrate dehydratase activity	MF	AN5994	0.00262812	0.0175208	1 / 1	1 / 98
GO:0070085	glycosylation	BP	AN8138	0.00262812	0.0175208	1 / 1	1 / 98
GO:0004557	alpha-galactosidase activity	MF	AN8138	0.0104917	0.0419669	1 / 4	1 / 98
GO:0052692	raffinose alpha-galactosidase activity	MF	AN8138	0.0104917	0.0419669	1 / 4	1 / 98
GO:0006012	galactose metabolic process	BP	AN8138	0.0157169	0.0449053	1 / 6	1 / 98
GO:0046355	mannan catabolic process	BP	AN8138	0.0157169	0.0449053	1 / 6	1 / 98

## Sheet: AtfB MSB myc
Table S5	Results of the gene set enrichment analyses for AtfA- and AtfB dependent genes.
Sheet 6	AtfB-dependent genes (Set27)	MSB treated cultures		mycelium
GO ID	GO name	GO namespace	Gene ID(s)	Exact p-value	Adjusted p-value	# genes / category	# genes / input
GO:0004022	alcohol dehydrogenase (NAD) activity	MF	AN2286	0.00525624	0.0197109	1 / 4	1 / 10
GO:0006066	alcohol metabolic process	BP	AN2286	0.00525624	0.0197109	1 / 4	1 / 10
GO:0006071	glycerol metabolic process	BP	AN2286	0.0065703	0.0197109	1 / 5	1 / 10
GO:0033609	oxalate metabolic process	BP	AN2286	0.00788436	0.0197109	1 / 6	1 / 10
KEGG pathway ID	KEGG pathway name	KEGG main category	Gene ID(s)	Exact p-value	Adjusted p-value	# genes / category	# genes / input
71	Fatty acid degradation	Metabolism	AN2286.2	0.0114504	0.0362595	1 / 18	1 / 10
1220	Degradation of aromatic compounds	Metabolism	AN2286.2	0.0139949	0.0362595	1 / 22	1 / 10
350	Tyrosine metabolism	Metabolism	AN2286.2	0.0216285	0.0362595	1 / 34	1 / 10
10	Glycolysis / Gluconeogenesis	Metabolism	AN2286.2	0.024173	0.0362595	1 / 38	1 / 10

## Sheet: AtfB untr con
Table S5	Results of the gene set enrichment analyses for AtfA- and AtfB dependent genes.
Sheet 7	AtfB-dependent genes (Set27)	untreated cultures		conidium
FunCat ID	FunCat description	FunCat main category	Gene ID(s)	Exact p-value	Adjusted p-value	# genes / category	# genes / input
1.05	C-compound and carbohydrate metabolism	Metabolism	ANIA_00554 | ANIA_00887 | ANIA_01300 | ANIA_01726 | ANIA_01918 | ANIA_02359 | ANIA_02583 | ANIA_02638 | ANIA_02704 | ANIA_02835 | ANIA_02860 | ANIA_03210 | ANIA_03305 | ANIA_03307 | ANIA_03515 | ANIA_03524 | ANIA_03573 | ANIA_03641 | ANIA_03679 | ANIA_04126 | ANIA_04155 | ANIA_05017 | ANIA_05258 | ANIA_05262 | ANIA_05273 | ANIA_05449 | ANIA_05523 | ANIA_05550 | ANIA_05604 | ANIA_05634 | ANIA_0615…	2.11978e-05	0.00593539	55 / 922	55 / 439
20.01.03	C-compound and carbohydrate transport	Cellular transport, transport facilitation and transport routes	ANIA_01930 | ANIA_02465 | ANIA_02475 | ANIA_02663 | ANIA_02822 | ANIA_03210 | ANIA_03515 | ANIA_03997 | ANIA_05943 | ANIA_06087 | ANIA_06811 | ANIA_06834 | ANIA_07088 | ANIA_07287 | ANIA_07618 | ANIA_07797 | ANIA_07898 | ANIA_08328 | ANIA_08467 | ANIA_08912 | ANIA_08990 | ANIA_10658 | ANIA_11092	7.50284e-05	0.010504	23 / 276	23 / 439
1.2	secondary metabolism	Metabolism	ANIA_00015 | ANIA_00732 | ANIA_00771 | ANIA_01300 | ANIA_01737 | ANIA_01799 | ANIA_01979 | ANIA_02475 | ANIA_02613 | ANIA_02615 | ANIA_02704 | ANIA_02780 | ANIA_03524 | ANIA_03573 | ANIA_03997 | ANIA_05258 | ANIA_05262 | ANIA_05274 | ANIA_05550 | ANIA_05653 | ANIA_05943 | ANIA_06151 | ANIA_06434 | ANIA_06811 | ANIA_07061 | ANIA_07088 | ANIA_07118 | ANIA_07138 | ANIA_07225 | ANIA_07274 | ANIA_0779…	0.000368647	0.0344071	57 / 1071	57 / 439
02.16.01	alcohol fermentation	Energy	ANIA_00554 | ANIA_02860 | ANIA_03573 | ANIA_04126 | ANIA_08336 | ANIA_10660 | ANIA_10703	0.000528535	0.0369974	7 / 42	7 / 439
01.20.70	regulation of secondary metabolism	Metabolism	ANIA_01641 | ANIA_06747 | ANIA_07118 | ANIA_08355 | ANIA_08473 | ANIA_09025 | ANIA_09050 | ANIA_11185	0.000707086	0.0395968	8 / 57	8 / 439
KEGG pathway ID	KEGG pathway name	KEGG main category	Gene ID(s)	Exact p-value	Adjusted p-value	# genes / category	# genes / input
10	Glycolysis / Gluconeogenesis	Metabolism	AN0554.2 | AN1918.2 | AN2583.2 | AN2638.2 | AN2860.2 | AN5604.2	1.68252e-05	0.000639357	6 / 38	6 / 439
500	Starch and sucrose metabolism	Metabolism	AN2359.2 | AN2638.2 | AN3402.2 | AN5523.2 | AN8639.2 | AN8953.2	5.24549e-05	0.000996644	6 / 46	6 / 439
1110	Biosynthesis of secondary metabolites	Metabolism	AN0554.2 | AN1726.2 | AN1918.2 | AN2583.2 | AN2638.2 | AN2728.2 | AN2860.2 | AN3641.2 | AN4154.2 | AN5273.2 | AN5604.2 | AN8553.2	0.000499223	0.0063235	12 / 282	12 / 439
1100	Metabolic pathways	Metabolism	AN0554.2 | AN1726.2 | AN1896.2 | AN1918.2 | AN2359.2 | AN2583.2 | AN2638.2 | AN2728.2 | AN2860.2 | AN3402.2 | AN3641.2 | AN4154.2 | AN5273.2 | AN5523.2 | AN5604.2 | AN5634.2 | AN8639.2 | AN8953.2	0.00261289	0.020766	18 / 669	18 / 439
1200	Carbon metabolism	Metabolism	AN1918.2 | AN2583.2 | AN2638.2 | AN3641.2 | AN5604.2 | AN5634.2	0.00273237	0.020766	6 / 94	6 / 439
280	Valine, leucine and isoleucine degradation	Metabolism	AN0554.2 | AN1726.2 | AN5273.2	0.00649088	0.0411089	3 / 25	3 / 439

## Sheet: AtfB MSB con
Table S5	Results of the gene set enrichment analyses for AtfA- and AtfB dependent genes.
Sheet 8	AtfB-dependent genes (Set27)	MSB treated cultures		conidium
GO ID	GO name	GO namespace	Gene ID(s)	Exact p-value	Adjusted p-value	# genes / category	# genes / input
GO:0004612	phosphoenolpyruvate carboxykinase (ATP) activity	MF	AN1918	0.00525624	0.0367937	1 / 1	1 / 157
GO:0004613	phosphoenolpyruvate carboxykinase (GTP) activity	MF	AN1918	0.00525624	0.0367937	1 / 1	1 / 157
GO:0017076	purine nucleotide binding	MF	AN1918	0.00525624	0.0367937	1 / 1	1 / 157
GO:0050086	mannitol 2-dehydrogenase activity	MF	AN2815	0.00525624	0.0367937	1 / 1	1 / 157
GO:0004611	phosphoenolpyruvate carboxykinase activity	MF	AN1918	0.00525624	0.0367937	1 / 1	1 / 157
