# Supplementary material for: Genome-Wide Gene Expression Analyses of the AtfA/AtfB-Mediated Menadione Stress Response in Aspergillus nidulans
Source: Cells. 2023 Jan 31;12(3):463. doi: 10.3390/cells12030463 (PMC9913763; doi:10.3390/cells12030463)
Supplement: Supplementary file 1 [file cells-12-00463-s001.zip › Table S4 gene groups.xlsx]

## Sheet: Secondary metabolism
Table S4 Characterization of AtfA- and AtfB-dependent genes by their known or putative functions.
Sheet 1 - Secondary metabolite cluster genes
NRPS - non-ribosomal peptide synthase
PKS - polyketide synthase
TF - transcription factor
a - According to Aspergillus Genome Database (http://www.aspgd.org/).
b - According to the reference(s) mentioned at the definition of the appropriate gene group in the Materials and methods chapter of the manuscript.
GENE ID	Gene namea	Description (AspGD)a	Clusterb	Key geneb	AtfA-dependent in untreated mycelial samples	AtfB-dependent in untreated mycelial samples	AtfA-dependent in MSB-treated mycelial samples	AtfB-dependent in MSB-treated mycelial samples	AtfA-dependent in untreated conidial samples	AtfB-dependent in untreated conidial samples	AtfA-dependent in MSB-treated conidial samples	AtfB-dependent in MSB-treated conidial samples
AN6451		Predicted transmembrane transporter; coregulated with the PKS pkbA/AN6448; predicted secondary metabolism gene cluster member	pkb cluster
AN6450		Tetrahydroxynaphthalene reductase; role in melanin biosynthesis;; coregulated with the PKS pkbA/AN6448; predicted secondary metabolism gene cluster member	pkb cluster
AN6449	CYP5077A1	Putative cytochrome P450; coregulated with the PKS pkbA/AN6448; encoded within the cichorine gene cluster	pkb cluster
AN11922	cicG	Protein of unknown function; encoded within the cichorine gene cluster	pkb cluster
AN6448	pkbA	Putative polyketide synthase; involved in cichorine production; predicted backbone enzyme of a secondary metabolism gene cluster member	pkb cluster	PKS
AN6447	cicE	Predicted O-methyltransferase; coregulated with the PKS pkbA/AN6448; encoded within the cichorine gene cluster	pkb cluster
AN6446	cicD	Predicted transcription factor; coregulated with the NRPS/AN6444; encoded within the cichorine gene cluster; possible transcriptional regulator of cluster	pkb cluster	TF
AN6445	cicC	Putative aryl-alcohol oxidase-related protein; coregulated with the NRPS/AN6444; encoded within the cichorine gene cluster	pkb cluster						AA
AN6444	cicB	Putative nonribosomal peptide synthase (NRPS)-like enzyme; encoded within the cichorine gene cluster	pkb cluster	NRPS
				Number of AtfA or AtfB dependent cluster genes:	0	0	0	0	1	0	0	0
				Number of genes in the cluster:	9	9	9	9	9	9	9	9
				Nmber of AtfA or AtfB depenent genes:	329	96	240	9	1496	439	1143	155
				Totel number of genes:	10775	10775	10775	10775	10775	10775	10775	10775
				p-value (Fisher's exact test):	1	1	1	1	0.7397	1	1	1
GENE ID	Gene name	Description (AspGD)	Cluster	Key gene	AtfA-dependent in untreated mycelial samples	AtfB-dependent in untreated mycelial samples	AtfA-dependent in MSB-treated mycelial samples	AtfB-dependent in MSB-treated mycelial samples	AtfA-dependent in untreated conidial samples	AtfB-dependent in untreated conidial samples	AtfA-dependent in MSB-treated conidial samples	AtfB-dependent in MSB-treated conidial samples
AN6437		Ortholog of Aspergillus versicolor : Aspve1_0052718 and Aspergillus sydowii : Aspsy1_0031878	AN6431 cluster						A-B	A-B	AA
AN6436		Has domain(s) with predicted ATP binding, ATPase activity, ATPase-coupled transmembrane transporter activity, nucleoside-triphosphatase activity, nucleotide binding activity and role in transmembrane transport	AN6431 cluster						AA
AN6435		Has domain(s) with predicted integral component of membrane localization	AN6431 cluster
AN6434	CYP672A1	Putative cytochrome P450	AN6431 cluster							BB
AN6433		Has domain(s) with predicted transferase activity, transferring hexosyl groups activity and role in metabolic process	AN6431 cluster
AN10816		Ortholog of A. fumigatus Af293 : Afu8g05030, A. oryzae RIB40 : AO090003001446, AO090009000107, Aspergillus versicolor : Aspve1_0130291 and Aspergillus clavatus NRRL 1 : ACLA_058430	AN6431 cluster
AN6432		Protein of unknown function; has domain(s) with predicted nucleotide binding activity; coregulated with the PKS AN6431; predicted secondary metabolism gene cluster member	AN6431 cluster
AN6431		Putative polyketide synthase; predicted backbone enzyme of a secondary metabolism gene cluster member; coregulated with AN6432	AN6431 cluster	PKS
				Number of AtfA or AtfB dependent cluster genes:	0	0	0	0	2	2	1	0
				Number of genes in the cluster:	8	8	8	8	8	8	8	8
				Nmber of AtfA or AtfB depenent genes:	329	96	240	9	1496	439	1143	155
				Totel number of genes:	10775	10775	10775	10775	10775	10775	10775	10775
				p-value (Fisher's exact test):	1	1	1	1	0.3074	0.0394	0.5924	1
GENE ID	Gene name	Description (AspGD)	Cluster	Key gene	AtfA-dependent in untreated mycelial samples	AtfB-dependent in untreated mycelial samples	AtfA-dependent in MSB-treated mycelial samples	AtfB-dependent in MSB-treated mycelial samples	AtfA-dependent in untreated conidial samples	AtfB-dependent in untreated conidial samples	AtfA-dependent in MSB-treated conidial samples	AtfB-dependent in MSB-treated conidial samples
AN6236	sidD	Nonribosomal peptide synthetase (NRPS); predicted backbone enzyme of a siderophore secondary metabolism biosynthetic gene cluster member	AN6236 cluster	NRPS
AN6235	sidH	Triacetylfusarinine C (TAFC) biosynthetic enoyl-CoA hydratase; siderophore biosynthetic enzyme	AN6236 cluster
AN6234	sidF	Predicted triacetylfusarinine C (TAFC) biosynthetic transacylase; siderophore biosynthetic protein; predicted secondary metabolism gene cluster member	AN6236 cluster
				Number of AtfA or AtfB dependent cluster genes:	0	0	0	0	0	0	0	0
				Number of genes in the cluster:	3	3	3	3	3	3	3	3
				Nmber of AtfA or AtfB depenent genes:	329	96	240	9	1496	439	1143	155
				Totel number of genes:	10775	10775	10775	10775	10775	10775	10775	10775
				p-value (Fisher's exact test):	1	1	1	1	1	1	1	1
GENE ID	Gene name	Description (AspGD)	Cluster	Key gene	AtfA-dependent in untreated mycelial samples	AtfB-dependent in untreated mycelial samples	AtfA-dependent in MSB-treated mycelial samples	AtfB-dependent in MSB-treated mycelial samples	AtfA-dependent in untreated conidial samples	AtfB-dependent in untreated conidial samples	AtfA-dependent in MSB-treated conidial samples	AtfB-dependent in MSB-treated conidial samples
AN6002	aptC	Putative monooxygenase; asperthecin (apt) gene cluster member required for asperthecin biosynthesis	Asperthecin (apt) cluster
AN6001	aptB	Putative hydrolase; asperthecin (apt) gene cluster member required for asperthecin biosynthesis; transcript repressed by nitrate	Asperthecin (apt) cluster
AN6000	aptA	Polyketide synthase; asperthecin (apt) gene cluster member required for asperthecin biosynthesis; contains ketosynthase, acyltransferase, and acyl carrier protein domains	Asperthecin (apt) cluster	PKS
				Number of AtfA or AtfB dependent cluster genes:	0	0	0	0	0	0	0	0
				Number of genes in the cluster:	3	3	3	3	3	3	3	3
				Nmber of AtfA or AtfB depenent genes:	329	96	240	9	1496	439	1143	155
				Totel number of genes:	10775	10775	10775	10775	10775	10775	10775	10775
				p-value (Fisher's exact test):	1	1	1	1	1	1	1	1
GENE ID	Gene name	Description (AspGD)	Cluster	Key gene	AtfA-dependent in untreated mycelial samples	AtfB-dependent in untreated mycelial samples	AtfA-dependent in MSB-treated mycelial samples	AtfB-dependent in MSB-treated mycelial samples	AtfA-dependent in untreated conidial samples	AtfB-dependent in untreated conidial samples	AtfA-dependent in MSB-treated conidial samples	AtfB-dependent in MSB-treated conidial samples
AN6784	xptA	Dimethyl-allyl-tryptophan synthase (DMATS) type aromatic prenyltransferase; required for xanthone (shamixanthone and epishamixanthone) and variecoxanthone biosynthesis; upregulated in nitrogen-limited continuous culture	xptA-containing cluster	DMATS type aromatic prenyltransferase
AN6785		Ortholog of A. fumigatus Af293 : Afu7g06760, Neosartorya fischeri NRRL 181 : NFIA_028050, Aspergillus versicolor : Aspve1_0046596 and Aspergillus fumigatus A1163 : AFUB_092340	xptA-containing cluster
AN11527		Protein of unknown function	xptA-containing cluster
AN6786		Putative beta-1,4-endoglucanase	xptA-containing cluster
AN6787	CYP682C1	Putative cytochrome P450	xptA-containing cluster, AN6791 cluster
AN6788		Putative transcription factor; predicted role in secondary metabolite production	xptA-containing cluster, AN6791 cluster	TF
AN6789		Protein of unknown function	xptA-containing cluster, AN6791 cluster
AN6790		Putative transcription factor; predicted role in secondary metabolite production	xptA-containing cluster, AN6791 cluster	TF
AN11907		Protein of unknown function	xptA-containing cluster, AN6791 cluster						A-B	A-B	AA
AN6791		Putative polyketide synthase	xptA-containing cluster, AN6791 cluster	PKS					AA		AA
				Number of AtfA or AtfB dependent cluster genes:	0	0	0	0	2	1	2	0
				Number of genes in the cluster:	10	10	10	10	10	10	10	10
				Nmber of AtfA or AtfB depenent genes:	329	96	240	9	1496	439	1143	155
				Totel number of genes:	10775	10775	10775	10775	10775	10775	10775	10775
				p-value (Fisher's exact test):	1	1	1	1	0.4141	0.3404	0.2875	1
GENE ID	Gene name	Description (AspGD)	Cluster	Key gene	AtfA-dependent in untreated mycelial samples	AtfB-dependent in untreated mycelial samples	AtfA-dependent in MSB-treated mycelial samples	AtfB-dependent in MSB-treated mycelial samples	AtfA-dependent in untreated conidial samples	AtfB-dependent in untreated conidial samples	AtfA-dependent in MSB-treated conidial samples	AtfB-dependent in MSB-treated conidial samples
AN7872		Predicted transcription factor; predicted secondary metabolism gene cluster member	AN7884 cluster (aspercryptin)	TF
AN7873		Putative multifunctional enzyme with a predicted role in cytosolic fatty acid formation; predicted secondary metabolism gene cluster member	AN7884 cluster (aspercryptin)
AN7875		Protein of unknown function; predicted secondary metabolism gene cluster member	AN7884 cluster (aspercryptin)
AN7874		Protein of unknown function; predicted secondary metabolism gene cluster member	AN7884 cluster (aspercryptin)
AN7876		Putative branched chain amino acid aminotransferase with a predicted role in branched chain amino acid biosynthesis; predicted secondary metabolism gene cluster member	AN7884 cluster (aspercryptin)				AA
AN7877		RTA-like protein; predicted secondary metabolism gene cluster member	AN7884 cluster (aspercryptin)
AN7878		Putative branched chain amino acid aminotransferase with a predicted role in valine, leucine, and isoleucine metabolism; predicted secondary metabolism gene cluster member	AN7884 cluster (aspercryptin)
AN7879		Predicted ABC transporter; predicted secondary metabolism gene cluster member	AN7884 cluster (aspercryptin)
AN7880		Putative fatty-acyl-CoA synthase with a predicted role in cytosolic fatty acid formation; predicted secondary metabolism gene cluster member	AN7884 cluster (aspercryptin)				AA
AN7881	CYP548C1	Putative cytochrome P450; predicted secondary metabolism gene cluster member	AN7884 cluster (aspercryptin)				AA
AN11028		Predicted nucleotide binding protein with oxidoreductase activity and a role in oxidation-reduction; predicted secondary metabolism gene cluster member	AN7884 cluster (aspercryptin)				AA
AN11031		Predicted transmembrane transporter; predicted secondary metabolism gene cluster member	AN7884 cluster (aspercryptin)
AN7883		Protein of unknown function; predicted secondary metabolism gene cluster member	AN7884 cluster (aspercryptin)
AN7884		Putative nonribosomal peptide synthase (NRPS) similar to ferrichrome peptide synthetases involved in siderophore biosynthesis; predicted backbone enzyme of a secondary metabolism gene cluster member	AN7884 cluster (aspercryptin)	NRPS			AA
				Number of AtfA or AtfB dependent cluster genes:	0	0	5	0	0	0	0	0
				Number of genes in the cluster:	14	14	14	14	14	14	14	14
				Nmber of AtfA or AtfB depenent genes:	329	96	240	9	1496	439	1143	155
				Totel number of genes:	10775	10775	10775	10775	10775	10775	10775	10775
				p-value (Fisher's exact test):	1	1	8.934e-06	1	1	1	1	1
GENE ID	Gene name	Description (AspGD)	Cluster	Key gene	AtfA-dependent in untreated mycelial samples	AtfB-dependent in untreated mycelial samples	AtfA-dependent in MSB-treated mycelial samples	AtfB-dependent in MSB-treated mycelial samples	AtfA-dependent in untreated conidial samples	AtfB-dependent in untreated conidial samples	AtfA-dependent in MSB-treated conidial samples	AtfB-dependent in MSB-treated conidial samples
AN7896	dbaA	Zn(II)2Cys6 transcription factor with a role in secondary metabolite biosynthesis; member of the dba gene cluster; overexpression upregulates dba gene cluster expression; dba cluster expression is coregulated	Derivative of Benzaldehyde1 (dba) and F9775 hybrid cluster 1	TF
AN7897	dbaB	FAD-binding monooxygenase with a role in secondary metabolism; member of the dba gene cluster; dba cluster expression is coregulated	Derivative of Benzaldehyde1 (dba) and F9775 hybrid cluster 1
AN11584	dbaC	YCII domain protein with a role in secondary metabolism; member of the dba gene cluster; dba cluster expression is coregulated	Derivative of Benzaldehyde1 (dba) and F9775 hybrid cluster 1
AN7898	dbaD	Major facilitator superfamily (MFS) transporter with a role in secondary metabolism; member of the dba gene cluster; dba cluster expression is coregulated	Derivative of Benzaldehyde1 (dba) and F9775 hybrid cluster 1		AA				A-B	A-B	AA
AN7899	dbaE	Putative esterase/lipase with a role in secondary metabolism; member of the dba gene cluster	Derivative of Benzaldehyde1 (dba) and F9775 hybrid cluster 1
AN7900	dbaF	Putative oxidoreductase with a role in secondary metabolism; member of the dba gene cluster; dba cluster expression is coregulated	Derivative of Benzaldehyde1 (dba) and F9775 hybrid cluster 1
AN7901	dbaG	Putative fungal transcription factor (no conserved domain); member of the dba gene cluster; dba cluster expression is coregulated	Derivative of Benzaldehyde1 (dba) and F9775 hybrid cluster 1	TF
AN7902	dbaH	FAD-binding monooxygenase with a role in secondary metabolism; member of the dba gene cluster; dba cluster expression is coregulated	Derivative of Benzaldehyde1 (dba) and F9775 hybrid cluster 1
AN7903	pkeA	Polyketide synthase; involved in orsellinic acid and violaceol production; member of the dba gene cluster; dba cluster expression is coregulated	Derivative of Benzaldehyde1 (dba) and F9775 hybrid cluster 1	PKS
				Number of AtfA or AtfB dependent cluster genes:	1	0	0	0	1	1	1	0
				Number of genes in the cluster:	9	9	9	9	9	9	9	9
				Nmber of AtfA or AtfB depenent genes:	329	96	240	9	1496	439	1143	155
				Totel number of genes:	10775	10775	10775	10775	10775	10775	10775	10775
				p-value (Fisher's exact test):	0.2436	1	1	1	0.7397	0.3124	0.6356	1
GENE ID	Gene name	Description (AspGD)	Cluster	Key gene	AtfA-dependent in untreated mycelial samples	AtfB-dependent in untreated mycelial samples	AtfA-dependent in MSB-treated mycelial samples	AtfB-dependent in MSB-treated mycelial samples	AtfA-dependent in untreated conidial samples	AtfB-dependent in untreated conidial samples	AtfA-dependent in MSB-treated conidial samples	AtfB-dependent in MSB-treated conidial samples
AN7907		Putative glyoxylate-bleomycin resistance protein; member of the F9775 secondary metabolite gene cluster	Derivative of Benzaldehyde1 (dba) and F9775 hybrid cluster 2						A-B	A-B	A-B	A-B
AN7908	axhA	Protein with alpha-arabinofuranosidase activity, involved in degradation of pectin; member of the F9775 secondary metabolite gene cluster	Derivative of Benzaldehyde1 (dba) and F9775 hybrid cluster 2
AN7909	orsA	Polyketide synthase; member of the F9775 secondary metabolite gene cluster; required for F9775 and orsellinic acid and violaceol biosynthesis	Derivative of Benzaldehyde1 (dba) and F9775 hybrid cluster 2	PKS
AN12004		Ortholog of Aspergillus brasiliensis : Aspbr1_0136489, Aspbr1_0206584, Aspergillus versicolor : Aspve1_0054872, Aspve1_0526796 and Aspergillus sydowii : Aspsy1_0042235, Aspsy1_0157426	Derivative of Benzaldehyde1 (dba) and F9775 hybrid cluster 2
AN7911	orsB	Putative amidohydrolase; member of the F9775 secondary metabolite gene cluster	Derivative of Benzaldehyde1 (dba) and F9775 hybrid cluster 2
AN7912	orsC	Putative tyrosinase; member of the F9775 secondary metabolite gene cluster	Derivative of Benzaldehyde1 (dba) and F9775 hybrid cluster 2
AN7914		Putative alcohol dehydrogenase; member of the F9775 secondary metabolite gene cluster; induced by rapamycin-induced autophagy	Derivative of Benzaldehyde1 (dba) and F9775 hybrid cluster 2
AN7913		Protein of unknown function; member of the F9775 secondary metabolite gene cluster	Derivative of Benzaldehyde1 (dba) and F9775 hybrid cluster 2
AN7915	bglD	Putative glucosidase; member of the F9775 secondary metabolite gene cluster	Derivative of Benzaldehyde1 (dba) and F9775 hybrid cluster 2						AB	AB
AN7916		Putative amino acid transporter; adjacent to the F9775 secondary metabolite gene cluster	Derivative of Benzaldehyde1 (dba) and F9775 hybrid cluster 2
				Number of AtfA or AtfB dependent cluster genes:	0	0	0	0	2	2	1	1
				Number of genes in the cluster:	10	10	10	10	10	10	10	10
				Nmber of AtfA or AtfB depenent genes:	329	96	240	9	1496	439	1143	155
				Totel number of genes:	10775	10775	10775	10775	10775	10775	10775	10775
				p-value (Fisher's exact test):	1	1	1	1	0.4141	0.06002	0.6743	0.1349
GENE ID	Gene name	Description (AspGD)	Cluster	Key gene	AtfA-dependent in untreated mycelial samples	AtfB-dependent in untreated mycelial samples	AtfA-dependent in MSB-treated mycelial samples	AtfB-dependent in MSB-treated mycelial samples	AtfA-dependent in untreated conidial samples	AtfB-dependent in untreated conidial samples	AtfA-dependent in MSB-treated conidial samples	AtfB-dependent in MSB-treated conidial samples
AN7999		Has domain(s) with predicted oxidoreductase activity and role in metabolic process	xptB-containing cluster		AA
AN12402	xptB	Prenyltransferase; deletion leads to the elimination of the prenyl xanthones, shamixanthone and epishamixanthone, and the accumulation of several metabolites including a monodictyphenone derivative	xptB-containing cluster	Prenyltransferase
AN9467	parA	Putative regulatory subunit of protein phosphatase 2A (PP2A)	xptB-containing cluster
AN12431		Protein of unknown function	xptB-containing cluster (AN12431)
				Number of AtfA or AtfB dependent cluster genes:	1	0	0	0	0	0	0	0
				Number of genes in the cluster:	4	4	4	4	4	4	4	4
				Nmber of AtfA or AtfB depenent genes:	329	96	240	9	1496	439	1143	155
				Totel number of genes:	10775	10775	10775	10775	10775	10775	10775	10775
				p-value (Fisher's exact test):	0.1167	1	1	1	1	1	1	1
GENE ID	Gene name	Description (AspGD)	Cluster	Key gene	AtfA-dependent in untreated mycelial samples	AtfB-dependent in untreated mycelial samples	AtfA-dependent in MSB-treated mycelial samples	AtfB-dependent in MSB-treated mycelial samples	AtfA-dependent in untreated conidial samples	AtfB-dependent in untreated conidial samples	AtfA-dependent in MSB-treated conidial samples	AtfB-dependent in MSB-treated conidial samples
AN8105		Putative nonribosomal peptide synthase (NRPS)-like enzyme; predicted secondary metabolism gene cluster member	AN8105 cluster	NRPS
AN8106		Predicted dioxygenase; role in secondary metabolite biosynthesis; predicted secondary metabolism gene cluster member	AN8105 cluster
AN11037		Predicted transmembrane transporter; predicted secondary metabolism gene cluster member	AN8105 cluster
AN11049		NmrA-like domain containing protein; predicted secondary metabolism gene cluster member	AN8105 cluster
AN11941		Putative L-iditol 2-dehydrogenase with a predicted role in mannose/mannitol, fructose, and sorbose/sorbitol metabolism	AN8105 cluster
AN8108		Predicted fumarylacetoacetase; predicted secondary metabolism gene cluster member	AN8105 cluster
AN11942		Ortholog(s) have ATPase activity	AN8105 cluster
AN8110		Putative short-chain dehydrogenase/reductase family protein; predicted secondary metabolism gene cluster member	AN8105 cluster
AN8111		Putative Zn(II)2Cys6 transcription factor; predicted role in secondary metabolite production; predicted secondary metabolism gene cluster member	AN8105 cluster	TF
AN8112		Predicted ransmembrane transporter; predicted secondary metabolism gene cluster member	AN8105 cluster
				Number of AtfA or AtfB dependent cluster genes:	0	0	0	0	0	0	0	0
				Number of genes in the cluster:	10	10	10	10	10	10	10	10
				Nmber of AtfA or AtfB depenent genes:	329	96	240	9	1496	439	1143	155
				Totel number of genes:	10775	10775	10775	10775	10775	10775	10775	10775
				p-value (Fisher's exact test):	1	1	1	1	1	1	1	1
GENE ID	Gene name	Description (AspGD)	Cluster	Key gene	AtfA-dependent in untreated mycelial samples	AtfB-dependent in untreated mycelial samples	AtfA-dependent in MSB-treated mycelial samples	AtfB-dependent in MSB-treated mycelial samples	AtfA-dependent in untreated conidial samples	AtfB-dependent in untreated conidial samples	AtfA-dependent in MSB-treated conidial samples	AtfB-dependent in MSB-treated conidial samples
AN12440		Has domain(s) with predicted catalytic activity, phosphopantetheine binding, transferase activity and role in metabolic process	AN8142 cluster
AN8139	CYP652A1	Putative cytochrome P450	AN8142 cluster
AN8140		Has domain(s) with predicted FAD binding, oxidoreductase activity and role in metabolic process	AN8142 cluster
AN8141	CYP5073A1	Putative cytochrome P450	AN8142 cluster
AN8142		Putative UbiA-like prenyltransferase; transcript repressed by nitrate	AN8142 cluster	Prenyltransferase
AN8143		Has domain(s) with predicted role in isoprenoid biosynthetic process	AN8142 cluster						AA
AN8144		Ortholog of A. nidulans FGSC A4 : AN1651, A. fumigatus Af293 : Afu5g14600, Afu6g00460, Afu6g13950, A. niger CBS 513.88 : An11g02490, An01g11420 and A. oryzae RIB40 : AO090001000384, AO090011000740	AN8142 cluster
				Number of AtfA or AtfB dependent cluster genes:	0	0	0	0	1	0	0	0
				Number of genes in the cluster:	7	7	7	7	7	7	7	7
				Nmber of AtfA or AtfB depenent genes:	329	96	240	9	1496	439	1143	155
				Totel number of genes:	10775	10775	10775	10775	10775	10775	10775	10775
				p-value (Fisher's exact test):	1	1	1	1	0.6489	1	1	1
GENE ID	Gene name	Description (AspGD)	Cluster	Key gene	AtfA-dependent in untreated mycelial samples	AtfB-dependent in untreated mycelial samples	AtfA-dependent in MSB-treated mycelial samples	AtfB-dependent in MSB-treated mycelial samples	AtfA-dependent in untreated conidial samples	AtfB-dependent in untreated conidial samples	AtfA-dependent in MSB-treated conidial samples	AtfB-dependent in MSB-treated conidial samples
AN8209	wA	Polyketide synthase involved in biosynthesis of the dark green pigment in the conidium wall that contributes to UV resistance; mutants produce white colonies due to colorless conidia; member of secondary metabolite gene cluster with AN8210	AN8209 (wA) cluster	PKS					AA		AA
AN8208		Has domain(s) with predicted role in histone deacetylation and HDA1 complex localization	AN8209 (wA) cluster
AN12403		Ortholog(s) have role in mitotic actomyosin contractile ring contraction, mitotic division septum assembly, regulation of cell shape	AN8209 (wA) cluster
AN12404		Ortholog of A. nidulans FGSC A4 : AN8899, A. fumigatus Af293 : Afu2g01030, Afu5g03420, A. niger CBS 513.88 : An09g05780 and A. oryzae RIB40 : AO090102000551, AO090701000360	AN8209 (wA) cluster
				Number of AtfA or AtfB dependent cluster genes:	0	0	0	0	1	0	1	0
				Number of genes in the cluster:	4	4	4	4	4	4	4	4
				Nmber of AtfA or AtfB depenent genes:	329	96	240	9	1496	439	1143	155
				Totel number of genes:	10775	10775	10775	10775	10775	10775	10775	10775
				p-value (Fisher's exact test):	1	1	1	1	0.4501	1	0.3615	1
GENE ID	Gene name	Description (AspGD)	Cluster	Key gene	AtfA-dependent in untreated mycelial samples	AtfB-dependent in untreated mycelial samples	AtfA-dependent in MSB-treated mycelial samples	AtfB-dependent in MSB-treated mycelial samples	AtfA-dependent in untreated conidial samples	AtfB-dependent in untreated conidial samples	AtfA-dependent in MSB-treated conidial samples	AtfB-dependent in MSB-treated conidial samples
AN10486		Putative nonribosomal peptide synthetase (NRPS)-like enzyme	AN10486 cluster	NRPS					AA
AN10491		Putative transcription factor; predicted role in secondary metabolite production	AN10486 cluster	TF
AN3911		Putative transcription factor; predicted role in secondary metabolite production	AN10486 cluster	TF
				Number of AtfA or AtfB dependent cluster genes:	0	0	0	0	1	0	0	0
				Number of genes in the cluster:	3	3	3	3	3	3	3	3
				Nmber of AtfA or AtfB depenent genes:	329	96	240	9	1496	439	1143	155
				Totel number of genes:	10775	10775	10775	10775	10775	10775	10775	10775
				p-value (Fisher's exact test):	1	1	1	1	0.3614	1	1	1
GENE ID	Gene name	Description (AspGD)	Cluster	Key gene	AtfA-dependent in untreated mycelial samples	AtfB-dependent in untreated mycelial samples	AtfA-dependent in MSB-treated mycelial samples	AtfB-dependent in MSB-treated mycelial samples	AtfA-dependent in untreated conidial samples	AtfB-dependent in untreated conidial samples	AtfA-dependent in MSB-treated conidial samples	AtfB-dependent in MSB-treated conidial samples
AN3612		Putative polyketide synthase	AN10430 cluster, AN3612 cluster	PKS					AA		AA
AN3611		Protein of unknown function; transcript is induced by nitrate; predicted NirA binding site	AN10430 cluster, AN3612 cluster
AN10430		Putative polyketide synthase (PKS) encoded in a secondary metabolite gene cluster	AN10430 cluster, AN3612 cluster	PKS
AN10447		Has domain(s) with predicted transferase activity, transferring acyl groups activity	AN10430 cluster, AN3612 cluster
AN3609	CYP681A1	Putative cytochrome P450	AN10430 cluster, AN3612 cluster
AN3608	atrC	Putative ATP-binding cassette (ABC) transporter; atrC mRNA levels increase in response to cyclohexamide treatment	AN3612 cluster
AN3607	lreB	Putative zinc-finger transcription factor involved in blue-light responsive differentiation; interacts with VeA, FphA, and LreA; similar to N. crassa blue-light-sensing component WC-2	AN3612 cluster	TF					AA		AA
AN3606		Ortholog of A. fumigatus Af293 : Afu4g12700, A. niger CBS 513.88 : An03g02800, A. oryzae RIB40 : AO090009000298, Aspergillus wentii : Aspwe1_0047287 and Aspergillus sydowii : Aspsy1_0090817	AN3612 cluster
AN3605		Has domain(s) with predicted oxidoreductase activity and role in oxidation-reduction process	AN3612 cluster						AA		AA
				Number of AtfA or AtfB dependent cluster genes:	0	0	0	0	3	0	3	0
				Number of genes in the cluster:	9	9	9	9	9	9	9	9
				Nmber of AtfA or AtfB depenent genes:	329	96	240	9	1496	439	1143	155
				Totel number of genes:	10775	10775	10775	10775	10775	10775	10775	10775
				p-value (Fisher's exact test):	1	1	1	1	0.1178	1	0.06136	1
GENE ID	Gene name	Description (AspGD)	Cluster	Key gene	AtfA-dependent in untreated mycelial samples	AtfB-dependent in untreated mycelial samples	AtfA-dependent in MSB-treated mycelial samples	AtfB-dependent in MSB-treated mycelial samples	AtfA-dependent in untreated conidial samples	AtfB-dependent in untreated conidial samples	AtfA-dependent in MSB-treated conidial samples	AtfB-dependent in MSB-treated conidial samples
AN3497	CYP623B2	Putative cytochrome P450	inp cluster
AN3496	inpB	Putative nonribosomal peptide synthetase with a role in asperfuranone biosynthesis; inp secondary metabolite gene cluster member; expression controlled by scpR; transcriptionally silent under standard laboratory conditions	inp cluster	NRPS
AN3495	inpA	Putative nonribosomal peptide synthetase with a role in asperfuranone biosynthesis; inp secondary metabolite gene cluster member; expression controlled by scpR; transcriptionally silent under standard laboratory conditions	inp cluster	NRPS
AN3494		Protein of unknown function; member of the inp secondary metabolite gene cluster	inp cluster
AN3493		Predicted threonine-type endopeptidase; inp secondary metabolite gene cluster member	inp cluster
AN3492	scpR	C2H2 type zinc finger transcription factor; regulator of asperfuranone biosynthesis; inp secondary metabolite gene cluster member	inp cluster	TF
AN3491		Predicted transmembrane transporter; inp secondary metabolite gene cluster member	inp cluster
AN3490		Predicted acetyl CoA synthase; inp secondary metabolite gene cluster member	inp cluster
				Number of AtfA or AtfB dependent cluster genes:	0	0	0	0	0	0	0	0
				Number of genes in the cluster:	8	8	8	8	8	8	8	8
				Nmber of AtfA or AtfB depenent genes:	329	96	240	9	1496	439	1143	155
				Totel number of genes:	10775	10775	10775	10775	10775	10775	10775	10775
				p-value (Fisher's exact test):	1	1	1	1	1	1	1	1
GENE ID	Gene name	Description (AspGD)	Cluster	Key gene	AtfA-dependent in untreated mycelial samples	AtfB-dependent in untreated mycelial samples	AtfA-dependent in MSB-treated mycelial samples	AtfB-dependent in MSB-treated mycelial samples	AtfA-dependent in untreated conidial samples	AtfB-dependent in untreated conidial samples	AtfA-dependent in MSB-treated conidial samples	AtfB-dependent in MSB-treated conidial samples
AN4827		Putative nonribosomal peptide synthetase (NRPS)-like enzyme; predicted backbone enzyme of a secondary metabolite gene cluster with AN10600	AN4827 cluster	NRPS
AN4826		Has domain(s) with predicted role in transmembrane transport and integral component of membrane localization	AN4827 cluster
AN4825		Putative glucan 1,3-beta-glucosidase with a predicted role in glucan metabolism	AN4827 cluster
AN4824		Has domain(s) with predicted transferase activity, transferring glycosyl groups activity and membrane localization	AN4827 cluster
AN4823		Putative chitin deacetylase	AN4827 cluster
AN9445		Has domain(s) with predicted ATP binding, nucleic acid binding activity	AN4827 cluster
AN9446	panK	Putative pantothenate kinase with a predicted role in Coenzyme A and pantothenate biosynthesis	AN4827 cluster
AN11232		Has domain(s) with predicted phosphatidylinositol N-acetylglucosaminyltransferase activity, role in GPI anchor biosynthetic process and integral component of membrane localization	AN4827 cluster
				Number of AtfA or AtfB dependent cluster genes:	0	0	0	0	0	0	0	0
				Number of genes in the cluster:	8	8	8	8	8	8	8	8
				Nmber of AtfA or AtfB depenent genes:	329	96	240	9	1496	439	1143	155
				Totel number of genes:	10775	10775	10775	10775	10775	10775	10775	10775
				p-value (Fisher's exact test):	1	1	1	1	1	1	1	1
GENE ID	Gene name	Description (AspGD)	Cluster	Key gene	AtfA-dependent in untreated mycelial samples	AtfB-dependent in untreated mycelial samples	AtfA-dependent in MSB-treated mycelial samples	AtfB-dependent in MSB-treated mycelial samples	AtfA-dependent in untreated conidial samples	AtfB-dependent in untreated conidial samples	AtfA-dependent in MSB-treated conidial samples	AtfB-dependent in MSB-treated conidial samples
AN10573	ivoC	Putative cytochrome P450; transcrip/tionally coregulated with ivoA/AN10576	ivo cluster				AA
AN10576	ivoA	One module nonribosomal peptide synthetase (NRPS); N-acetyl-6-hydroxytryptophan (AHT) biosynthesis; mutant conidiophores, stalks, metulae, phialides lack pigmentation; secondary metabolism gene cluster member	ivo cluster	NRPS					AB	AB
				Number of AtfA or AtfB dependent cluster genes:	0	0	1	0	1	1	0	0
				Number of genes in the cluster:	2	2	2	2	2	2	2	2
				Nmber of AtfA or AtfB depenent genes:	329	96	240	9	1496	439	1143	155
				Totel number of genes:	10775	10775	10775	10775	10775	10775	10775	10775
				p-value (Fisher's exact test):	1	1	0.04405	1	0.2584	0.07983	1	1
GENE ID	Gene name	Description (AspGD)	Cluster	Key gene	AtfA-dependent in untreated mycelial samples	AtfB-dependent in untreated mycelial samples	AtfA-dependent in MSB-treated mycelial samples	AtfB-dependent in MSB-treated mycelial samples	AtfA-dependent in untreated conidial samples	AtfB-dependent in untreated conidial samples	AtfA-dependent in MSB-treated conidial samples	AtfB-dependent in MSB-treated conidial samples
AN7086		Putative F-box protein; predicted secondary metabolism gene cluster member	AN7084 cluster
AN12291		Ortholog of A. nidulans FGSC A4 : AN8528, A. fumigatus Af293 : Afu5g09790, A. niger CBS 513.88 : An15g05030, A. oryzae RIB40 : AO090010000330 and Aspergillus wentii : Aspwe1_0054537, Aspwe1_0170434	AN7084 cluster		AA
AN12290		Has domain(s) with predicted oxidoreductase activity and role in metabolic process	AN7084 cluster
AN7084		Putative polyketide synthase (PKS)-like enzyme; predicted secondary metabolism gene cluster member	AN7084 cluster	PKS
AN7083		Predicted aminopeptidase; predicted secondary metabolism gene cluster member	AN7084 cluster
AN10887	CYP5095B1	Putative cytochrome P450; predicted secondary metabolism gene cluster member	AN7084 cluster
AN10886		Protein of unknown function; predicted secondary metabolism gene cluster member	AN7084 cluster
AN7081		Predicted UDP-N-acetylmuramate dehydrogenase; predicted secondary metabolism gene cluster member	AN7084 cluster
AN7080		Protein of unknown function; predicted secondary metabolism gene cluster member	AN7084 cluster
				Number of AtfA or AtfB dependent cluster genes:	1	0	0	0	0	0	0	0
				Number of genes in the cluster:	9	9	9	9	9	9	9	9
				Nmber of AtfA or AtfB depenent genes:	329	96	240	9	1496	439	1143	155
				Totel number of genes:	10775	10775	10775	10775	10775	10775	10775	10775
				p-value (Fisher's exact test):	0.2436	1	1	1	1	1	1	1
GENE ID	Gene name	Description (AspGD)	Cluster	Key gene	AtfA-dependent in untreated mycelial samples	AtfB-dependent in untreated mycelial samples	AtfA-dependent in MSB-treated mycelial samples	AtfB-dependent in MSB-treated mycelial samples	AtfA-dependent in untreated conidial samples	AtfB-dependent in untreated conidial samples	AtfA-dependent in MSB-treated conidial samples	AtfB-dependent in MSB-treated conidial samples
AN7075		Has domain(s) with predicted UDP-N-acetylmuramate dehydrogenase activity, flavin adenine dinucleotide binding, oxidoreductase activity and role in oxidation-reduction process	pkg cluster
AN7074		Putative oxidoreductase; induced in pyrG mutant in response to excess uracil	pkg cluster
AN7073		Putative transcription factor; predicted role in secondary metabolite production; predicted secondary metabolism gene cluster member; coregulated with the PKS pkgA/AN7071	pkg cluster
AN7072		Predicted DNA binding protein; ortholog has a role in aflatoxin biosynthesis; predicted secondary metabolism gene cluster member; coregulated with the PKS pkgA/AN7071	pkg cluster
AN7071	pkgA	Putative polyketide synthase; involved in the production of alternariol and other secondary metabolites; predicted backbone enzyme of a secondary metabolism gene cluster	pkg cluster	PKS
AN7070	pkgB	Beta-lactamase-type thioesterase; involved in production of alternariol and other secondary metabolites; predicted secondary metabolism gene cluster member; coregulated with the PKS pkgA/AN7071	pkg cluster
				Number of AtfA or AtfB dependent cluster genes:	0	0	0	0	0	0	0	0
				Number of genes in the cluster:	6	6	6	6	6	6	6	6
				Nmber of AtfA or AtfB depenent genes:	329	96	240	9	1496	439	1143	155
				Totel number of genes:	10775	10775	10775	10775	10775	10775	10775	10775
				p-value (Fisher's exact test):	1	1	1	1	1	1	1	1
GENE ID	Gene name	Description (AspGD)	Cluster	Key gene	AtfA-dependent in untreated mycelial samples	AtfB-dependent in untreated mycelial samples	AtfA-dependent in MSB-treated mycelial samples	AtfB-dependent in MSB-treated mycelial samples	AtfA-dependent in untreated conidial samples	AtfB-dependent in untreated conidial samples	AtfA-dependent in MSB-treated conidial samples	AtfB-dependent in MSB-treated conidial samples
AN7485	mirC	Predicted siderophore iron transporter	AN7489 (mirC) cluster
AN7487	modA	Rho GTPase protein involved in hyphal cell polarity, hyphal branch formation and normal germination of conidia; required for wild-type conidophore development; GFP-Cdc42 localizes to hyphal tip; synthetically lethal with racA null	AN7489 (mirC) cluster
AN7488		Has domain(s) with predicted hydrolase activity, acting on carbon-nitrogen (but not peptide) bonds, in linear amidines, metal ion binding activity	AN7489 (mirC) cluster						AA
AN7489		Putative type II fatty acid synthase with a predicted role in mitochondrial fatty acid formation; mitochondrial 3-oxoacyl-[acyl-carrier-protein]-synthase; putative polyketide synthase (PKS-like) protein	AN7489 (mirC) cluster	mitochondrial 3-oxoacyl-[acylcarrier-protein]-synthase
AN7491		Putative ubiquitin C-terminal hydrolase; ortholog of S. cerevisiae Yuh1p which has role in protein deubiquitination; expression upregulated after exposure to farnesol	AN7489 (mirC) cluster
AN7490		Has domain(s) with predicted methyltransferase activity and role in nucleobase-containing compound metabolic process	AN7489 (mirC) cluster
AN7492		Ortholog(s) have RNA 7-methylguanosine cap binding, exoribonuclease activator activity, hydrolase activity, acting on acid anhydrides, in phosphorus-containing anhydrides, m7G(5')pppN diphosphatase activity	AN7489 (mirC) cluster
AN7493		Has domain(s) with predicted role in RNA catabolic process and ribonuclease H2 complex localization	AN7489 (mirC) cluster
				Number of AtfA or AtfB dependent cluster genes:	0	0	0	0	1	0	0	0
				Number of genes in the cluster:	8	8	8	8	8	8	8	8
				Nmber of AtfA or AtfB depenent genes:	329	96	240	9	1496	439	1143	155
				Totel number of genes:	10775	10775	10775	10775	10775	10775	10775	10775
				p-value (Fisher's exact test):	1	1	1	1	0.6977	1	1	1
GENE ID	Gene name	Description (AspGD)	Cluster	Key gene	AtfA-dependent in untreated mycelial samples	AtfB-dependent in untreated mycelial samples	AtfA-dependent in MSB-treated mycelial samples	AtfB-dependent in MSB-treated mycelial samples	AtfA-dependent in untreated conidial samples	AtfB-dependent in untreated conidial samples	AtfA-dependent in MSB-treated conidial samples	AtfB-dependent in MSB-treated conidial samples
AN7804	stcW	Putative FAD-containing monooxygenase with a predicted role in sterigmatocystin/aflatoxin biosynthesis; member of the sterigmatocystin biosynthesis gene cluster; expression upregulated after exposure to farnesol	Sterigmatocystin (stc) cluster
AN7805	stcV	Putative norsolorinic acid reductase with a predicted role in sterigmatocystin/aflatoxin biosynthesis; member of the sterigmatocystin biosynthesis gene cluster	Sterigmatocystin (stc) cluster
AN7806	stcU	Putative versicolorin reductase with a predicted role in sterigmatocystin/aflatoxin biosynthesis; member of the sterigmatocystin biosynthesis gene cluster	Sterigmatocystin (stc) cluster
AN7807	stcT	Putative translation elongation factor 1 gamma; member of the sterigmatocystin biosynthesis gene cluster	Sterigmatocystin (stc) cluster
AN12089		Ortholog of A. niger CBS 513.88 : An11g02070, A. oryzae RIB40 : AO090124000044, AO090005000192 and Aspergillus versicolor : Aspve1_0045579, Aspve1_0073154, Aspve1_0081145	Sterigmatocystin (stc) cluster
AN7808	stcS	Putative sterigmatocystin biosynthesis P450 monooxygenase of the CYP59 family; predicted role in sterigmatocystin/aflatoxin biosynthesis; member of the sterigmatocystin biosynthesis gene cluster	Sterigmatocystin (stc) cluster
AN7809		Ortholog of Aspergillus versicolor : Aspve1_0126175 and Aspergillus terreus NIH2624 : ATET_01291	Sterigmatocystin (stc) cluster
AN7810	stcQ	Putative aflatoxin biosynthesis protein with a role in aflatoxin/sterigmatocystin biosynthesis; member of the sterigmatocystin biosynthesis gene cluster	Sterigmatocystin (stc) cluster
AN12090		Has domain(s) with predicted O-methyltransferase activity	Sterigmatocystin (stc) cluster
AN7811	stcO	Putative sterigmatocystin biosynthesis protein with a predicted role in sterigmatocystin/aflatoxin biosynthesis; member of the sterigmatocystin biosynthesis gene cluster; transcript repressed by nitrate	Sterigmatocystin (stc) cluster
AN7812	stcN	Putative versicolorin B synthase with a predicted role in sterigmatocystin/aflatoxin biosynthesis; member of the sterigmatocystin biosynthesis gene cluster	Sterigmatocystin (stc) cluster
AN11017		Ortholog of A. nidulans FGSC A4 : AN12099, A. fumigatus Af293 : Afu4g14480, A. oryzae RIB40 : AO090026000010 and N. fischeri NRRL 181 : NFIA_101640, NFIA_101900	Sterigmatocystin (stc) cluster
AN11013	stcL	Putative p450 monooxygenase required for desaturation of bisfuran in the sterigmatocystin biosynthesis pathway; member of the sterigmatocystin biosynthesis gene cluster	Sterigmatocystin (stc) cluster
AN7814	stcK	Putative polyketide synthase/fatty acid synthase beta; required for sterigmatocystin biosynthesis; member of the sterigmatocystin biosynthesis gene cluster	Sterigmatocystin (stc) cluster	PKS
AN7815	stcJ	Putative polyketide synthase/fatty acid synthase alpha; putative role in aflatoxin biosynthesis; required for sterigmatocystin biosynthesis; member of the sterigmatocystin biosynthesis gene cluster	Sterigmatocystin (stc) cluster
AN7816	stcI	Putative sterigmatocystin biosynthesis lipase/esterase with a predicted role in sterigmatocystin/aflatoxin biosynthesis; member of the sterigmatocystin biosynthesis gene cluster	Sterigmatocystin (stc) cluster
AN11021		Ortholog of A. oryzae RIB40 : AO090001000219, Aspergillus brasiliensis : Aspbr1_0192818, N. fischeri NRRL 181 : NFIA_012970, Aspergillus flavus NRRL 3357 : AFL2T_07452 and A. clavatus NRRL 1 : ACLA_022880	Sterigmatocystin (stc) cluster
AN7817		Putative protein with a predicted role in sterigmatocystin/aflatoxin biosynthesis	Sterigmatocystin (stc) cluster
AN7818	stcF	Putative sterigmatocystin biosynthesis P450 monooxygenase with a predicted role in sterigmatocystin/aflatoxin biosynthesis	Sterigmatocystin (stc) cluster
AN7819		Ortholog(s) have role in aflatoxin biosynthetic process, regulation of aflatoxin biosynthetic process	Sterigmatocystin (stc) cluster
AN7821	stcE	Putative norsolorinic acid reductase with a predicted role in sterigmatocystin/aflatoxin biosynthesis; member of the sterigmatocystin biosynthesis gene cluster	Sterigmatocystin (stc) cluster
AN7822		Ortholog of A. fumigatus Af293 : Afu5g00770, Aspergillus brasiliensis : Aspbr1_0058805, N. fischeri NRRL 181 : NFIA_041410, Aspergillus flavus NRRL 3357 : AFL2T_07218 and A. clavatus NRRL 1 : ACLA_004530	Sterigmatocystin (stc) cluster		AA
AN7820	aflR	Transcriptional activator of the sterigmatocystin biosynthesis gene cluster; contains DNA-binding C6 zinc binuclear cluster motifs; transcript repressed by nitrate; negatively regulated by PKA activity	Sterigmatocystin (stc) cluster	TF
AN7823	stcC	Putative peroxidase; member of the sterigmatocystin biosynthesis gene cluster	Sterigmatocystin (stc) cluster
AN7824	stcB	Putative sterigmatocystin biosynthesis P450 monooxygenase with a predicted role in sterigmatocystin/aflatoxin biosynthesis; member of the sterigmatocystin biosynthesis gene cluster	Sterigmatocystin (stc) cluster
AN7825	stcA	Putative polyketide synthase with a predicted role in sterigmatocystin/aflatoxin biosynthesis; member of the sterigmatocystin biosynthesis gene cluster	Sterigmatocystin (stc) cluster	PKS
				Number of AtfA or AtfB dependent cluster genes:	1	0	0	0	0	0	0	0
				Number of genes in the cluster:	26	26	26	26	26	26	26	26
				Nmber of AtfA or AtfB depenent genes:	329	96	240	9	1496	439	1143	155
				Totel number of genes:	10775	10775	10775	10775	10775	10775	10775	10775
				p-value (Fisher's exact test):	0.5539	1	1	1	1	1	1	1
GENE ID	Gene name	Description (AspGD)	Cluster	Key gene	AtfA-dependent in untreated mycelial samples	AtfB-dependent in untreated mycelial samples	AtfA-dependent in MSB-treated mycelial samples	AtfB-dependent in MSB-treated mycelial samples	AtfA-dependent in untreated conidial samples	AtfB-dependent in untreated conidial samples	AtfA-dependent in MSB-treated conidial samples	AtfB-dependent in MSB-treated conidial samples
AN11024		Has domain(s) with predicted oxidoreductase activity and role in metabolic process	AN7838 (AN12331) cluster
AN7836		Ortholog of A. fumigatus Af293 : Afu7g01060, A. oryzae RIB40 : AO090003000833, Neosartorya fischeri NRRL 181 : NFIA_113770 and Aspergillus terreus NIH2624 : ATET_02590	AN12331 cluster, AN7838 (AN12331) cluster		AA		AA
AN12330		Protein of unknown function	AN12331 cluster, AN7838 (AN12331) cluster
AN12331		Putative polyketide synthase (PKS)-like enzyme	AN12331 cluster, AN7838 (AN12331) cluster	PKS
AN7839		Has domain(s) with predicted ATP binding, ATPase activity, ATPase-coupled transmembrane transporter activity, nucleoside-triphosphatase activity, nucleotide binding activity and role in transmembrane transport	AN12331 cluster, AN7838 (AN12331) cluster
				Number of AtfA or AtfB dependent cluster genes:	1	0	1	0	0	0	0	0
				Number of genes in the cluster:	5	5	5	5	5	5	5	5
				Nmber of AtfA or AtfB depenent genes:	329	96	240	9	1496	439	1143	155
				Totel number of genes:	10775	10775	10775	10775	10775	10775	10775	10775
				p-value (Fisher's exact test):	0.1437	1	0.1065	1	1	1	1	1
GENE ID	Gene name	Description (AspGD)	Cluster	Key gene	AtfA-dependent in untreated mycelial samples	AtfB-dependent in untreated mycelial samples	AtfA-dependent in MSB-treated mycelial samples	AtfB-dependent in MSB-treated mycelial samples	AtfA-dependent in untreated conidial samples	AtfB-dependent in untreated conidial samples	AtfA-dependent in MSB-treated conidial samples	AtfB-dependent in MSB-treated conidial samples
AN8379	ausB	Predicted oxidoreductase; required for austinol and dehydroaustinol biosynthesis	Austinol (aus) cluster 2
AN11871		Ortholog of A. fumigatus Af293 : Afu1g11260, Afu4g01030, Afu6g00270, A. niger CBS 513.88 : An03g03440, An01g01460, An01g01410, An04g04460 and Aspergillus wentii : Aspwe1_0176870	Austinol (aus) cluster 2
AN8381	ausC	Protein of unknown function; required for austinol and dehydroaustinol biosynthesis, aus secondary metabolism gene cluster member	Austinol (aus) cluster 2
AN8383	ausA	Polyketide synthase (PKS); produces 3,5- dimethyl orsellinic acid, the first intermediate in the biosynthesis of austinol and dehydroaustinol; aus secondary metabolism gene cluster member	Austinol (aus) cluster 2	PKS			AA
AN8384	ausD	Protein of unknown function; required for austinol and dehydroaustinol biosynthesis; aus secondary metabolism gene cluster member	Austinol (aus) cluster 2
				Number of AtfA or AtfB dependent cluster genes:	0	0	1	0	0	0	0	0
				Number of genes in the cluster:	5	5	5	5	5	5	5	5
				Nmber of AtfA or AtfB depenent genes:	329	96	240	9	1496	439	1143	155
				Totel number of genes:	10775	10775	10775	10775	10775	10775	10775	10775
				p-value (Fisher's exact test):	1	1	0.1065	1	1	1	1	1
GENE ID	Gene name	Description (AspGD)	Cluster	Key gene	AtfA-dependent in untreated mycelial samples	AtfB-dependent in untreated mycelial samples	AtfA-dependent in MSB-treated mycelial samples	AtfB-dependent in MSB-treated mycelial samples	AtfA-dependent in untreated conidial samples	AtfB-dependent in untreated conidial samples	AtfA-dependent in MSB-treated conidial samples	AtfB-dependent in MSB-treated conidial samples
AN8408	apdB	Putative cytochrome P450 monooxygenase; member of the aspyridone (apd) gene cluster	Aspyridone (asp) cluster
AN8409	apdC	Putative enoyl reductase; member of the aspyridone (apd) gene cluster	Aspyridone (asp) cluster
AN8410	apdD	Putative FAD-dependent monooxygenase; member of the aspyridone (apd) gene cluster	Aspyridone (asp) cluster
AN8411	apdE	Putative cytochrome P450 monooxygenase; member of the aspyridone (apd) gene cluster	Aspyridone (asp) cluster
AN8412	apdA	Putative hybrid polyketide synthase-nonribosomal peptide synthase (PKS-NRPS); aspyridone synthetase; member of the aspyridone (apd) gene cluster	Aspyridone (asp) cluster	PKS-NRPS
AN8413	apdF	Putative exporter; member of the aspyridone (apd) gene cluster	Aspyridone (asp) cluster
AN8414	apdR	Putative transcription factor; member of the aspyridone (apd) gene cluster; role in aspyridone production	Aspyridone (asp) cluster	TF
AN11872		Protein of unknown function	Aspyridone (asp) cluster
AN8415	apdG	Putative acyl-coA dehydrogenase; member of the aspyridone (apd) gene cluster	Aspyridone (asp) cluster
				Number of AtfA or AtfB dependent cluster genes:	0	0	0	0	0	0	0	0
				Number of genes in the cluster:	9	9	9	9	9	9	9	9
				Nmber of AtfA or AtfB depenent genes:	329	96	240	9	1496	439	1143	155
				Totel number of genes:	10775	10775	10775	10775	10775	10775	10775	10775
				p-value (Fisher's exact test):	1	1	1	1	1	1	1	1
GENE ID	Gene name	Description (AspGD)	Cluster	Key gene	AtfA-dependent in untreated mycelial samples	AtfB-dependent in untreated mycelial samples	AtfA-dependent in MSB-treated mycelial samples	AtfB-dependent in MSB-treated mycelial samples	AtfA-dependent in untreated conidial samples	AtfB-dependent in untreated conidial samples	AtfA-dependent in MSB-treated conidial samples	AtfB-dependent in MSB-treated conidial samples
AN11082		Ortholog of A. fumigatus Af293 : Afu3g01020, A. niger CBS 513.88 : An13g02710, A. oryzae RIB40 : AO090009000080, Aspergillus wentii : Aspwe1_0114128 and Aspergillus sydowii : Aspsy1_0159929	Nidulanin A (nptA) cluster
AN11080		Putative dimethyl-allyl-tryptophan synthase (DMATS)-type aromatic prenyltransferase	Nidulanin A (nptA) cluster	DMATS-type aromatic prenyltransferase
				Number of AtfA or AtfB dependent cluster genes:	0	0	0	0	0	0	0	0
				Number of genes in the cluster:	2	2	2	2	2	2	2	2
				Nmber of AtfA or AtfB depenent genes:	329	96	240	9	1496	439	1143	155
				Totel number of genes:	10775	10775	10775	10775	10775	10775	10775	10775
				p-value (Fisher's exact test):	1	1	1	1	1	1	1	1
GENE ID	Gene name	Description (AspGD)	Cluster	Key gene	AtfA-dependent in untreated mycelial samples	AtfB-dependent in untreated mycelial samples	AtfA-dependent in MSB-treated mycelial samples	AtfB-dependent in MSB-treated mycelial samples	AtfA-dependent in untreated conidial samples	AtfB-dependent in untreated conidial samples	AtfA-dependent in MSB-treated conidial samples	AtfB-dependent in MSB-treated conidial samples
AN8495		Ortholog of A. nidulans FGSC A4 : AN3479, AN3143, A. fumigatus Af293 : Afu3g01440, Afu3g13940, Afu4g03340, Afu5g07620 and A. niger CBS 513.88 : An13g02880, An09g04780	AN8504 cluster						AA		AA
AN8496		Has domain(s) with predicted metal ion binding activity	AN8504 cluster						AA		AA
AN8497		Has domain(s) with predicted carbon-sulfur lyase activity and role in metabolic process	AN8504 cluster
AN8498		Ortholog of A. nidulans FGSC A4 : AN5429, AN8310, AN11121, A. fumigatus Af293 : Afu3g01350 and A. niger CBS 513.88 : An12g08560, An09g02370, An13g02790, An13g02620	AN8504 cluster
AN8500		Ortholog of A. niger CBS 513.88 : An13g02820, A. oryzae RIB40 : AO090009000060, Aspergillus wentii : Aspwe1_0122164, Aspergillus versicolor : Aspve1_0370452 and Aspergillus niger ATCC 1015 : 192087-mRNA	AN8504 cluster
AN8499		Ortholog(s) have heme binding, heme transporter activity, role in heme import across plasma membrane and integral component of membrane, plasma membrane localization	AN8504 cluster
AN8501		Ortholog of A. fumigatus Af293 : Afu1g01560, A. niger CBS 513.88 : An04g08620, A. oryzae RIB40 : AO090009000717 and Aspergillus wentii : Aspwe1_0046512, Aspwe1_0102964	AN8504 cluster
AN8502		Ortholog(s) have role in cellular response to drug	AN8504 cluster
AN8503		Ortholog of A. niger CBS 513.88 : An13g03080, Aspergillus wentii : Aspwe1_0177501, Aspergillus versicolor : Aspve1_0046851 and Aspergillus sydowii : Aspsy1_0159981	AN8504 cluster						AA		AA
AN8504		Has domain(s) with predicted catalytic activity and role in metabolic process	AN8504 cluster	NRPS
				Number of AtfA or AtfB dependent cluster genes:	0	0	0	0	3	0	3	0
				Number of genes in the cluster:	10	10	10	10	10	10	10	10
				Nmber of AtfA or AtfB depenent genes:	329	96	240	9	1496	439	1143	155
				Totel number of genes:	10775	10775	10775	10775	10775	10775	10775	10775
				p-value (Fisher's exact test):	1	1	1	1	0.1516	1	0.08095	1
GENE ID	Gene name	Description (AspGD)	Cluster	Key gene	AtfA-dependent in untreated mycelial samples	AtfB-dependent in untreated mycelial samples	AtfA-dependent in MSB-treated mycelial samples	AtfB-dependent in MSB-treated mycelial samples	AtfA-dependent in untreated conidial samples	AtfB-dependent in untreated conidial samples	AtfA-dependent in MSB-treated conidial samples	AtfB-dependent in MSB-treated conidial samples
AN8513	tdiA	Putative single-module nonribosomal peptide synthetase (NRPS); member of the tdi (terrequinone A biosynthesis) gene cluster; transcriptionally regulated by LaeA	Terriquinone (tdi) cluster	NRPS
AN8514	tdiB	Asterriquinone prenyltransferase; member of the tdi gene cluster; required for terrequinone A production; catalyzes the reverse prenylation event during terrequinone A biosynthesis; lacks canonical prenyl diphosphate binding motif (D/N)DXXD	Terriquinone (tdi) cluster	DMATS type aromatic prenyltransferase
AN8518	tdiC	Similar to NADPH-dependent quinone reductases; member of the tdi (terrequinone A biosynthesis) gene cluster; transcriptionally regulated by LaeA	Terriquinone (tdi) cluster
AN8516	tdiD	Putative aminotransferase; member of the tdi (terrequinone A biosynthesis) gene cluster; transcriptionally regulated by LaeA	Terriquinone (tdi) cluster
AN8520	tdiE	Protein required for terrequinone A biosynthesis; member of the tdi (terrequinone A biosynthesis) gene cluster; transcriptionally regulated by LaeA	Terriquinone (tdi) cluster
				Number of AtfA or AtfB dependent cluster genes:	0	0	0	0	0	0	0	0
				Number of genes in the cluster:	5	5	5	5	5	5	5	5
				Nmber of AtfA or AtfB depenent genes:	329	96	240	9	1496	439	1143	155
				Totel number of genes:	10775	10775	10775	10775	10775	10775	10775	10775
				p-value (Fisher's exact test):	1	1	1	1	1	1	1	1
GENE ID	Gene name	Description (AspGD)	Cluster	Key gene	AtfA-dependent in untreated mycelial samples	AtfB-dependent in untreated mycelial samples	AtfA-dependent in MSB-treated mycelial samples	AtfB-dependent in MSB-treated mycelial samples	AtfA-dependent in untreated conidial samples	AtfB-dependent in untreated conidial samples	AtfA-dependent in MSB-treated conidial samples	AtfB-dependent in MSB-treated conidial samples
AN5610		Putative L-aminoadipate-semialdehyde dehydrogenase with a predicted role in lysine metabolism	AN5610 cluster	L-aminoadipate-semialdehyde-dehidrogenase
AN10720		Has domain(s) with predicted role in transmembrane transport and integral component of membrane localization	AN5610 cluster
AN5609		Has domain(s) with predicted DNA-binding transcription factor activity, DNA-binding transcription factor activity, RNA polymerase II-specific, zinc ion binding activity and role in regulation of transcription, DNA-templated	AN5610 cluster	TF
AN9474		Ortholog of S. cerevisiae : YPL088W, A. fumigatus Af293 : Afu4g11260, A. niger CBS 513.88 : An15g04210, An04g05380 and A. oryzae RIB40 : AO090005000195, AO090003001095, AO090120000002	AN5610 cluster
AN5608		Ortholog of A. nidulans FGSC A4 : AN4473, A. fumigatus Af293 : Afu4g07720, A. niger CBS 513.88 : An14g07030, An04g02100 and A. oryzae RIB40 : AO090023000800, AO090009000070	AN5610 cluster
AN9473		Ortholog of A. fumigatus Af293 : Afu4g11270, A. niger CBS 513.88 : An04g05360, A. oryzae RIB40 : AO090003001094, Aspergillus wentii : Aspwe1_0102365 and Aspergillus sydowii : Aspsy1_0148568	AN5610 cluster
				Number of AtfA or AtfB dependent cluster genes:	0	0	0	0	0	0	0	0
				Number of genes in the cluster:	6	6	6	6	6	6	6	6
				Nmber of AtfA or AtfB depenent genes:	329	96	240	9	1496	439	1143	155
				Totel number of genes:	10775	10775	10775	10775	10775	10775	10775	10775
				p-value (Fisher's exact test):	1	1	1	1	1	1	1	1
GENE ID	Gene name	Description (AspGD)	Cluster	Key gene	AtfA-dependent in untreated mycelial samples	AtfB-dependent in untreated mycelial samples	AtfA-dependent in MSB-treated mycelial samples	AtfB-dependent in MSB-treated mycelial samples	AtfA-dependent in untreated conidial samples	AtfB-dependent in untreated conidial samples	AtfA-dependent in MSB-treated conidial samples	AtfB-dependent in MSB-treated conidial samples
AN5318		Putative non-ribosomal peptide synthetase; expression upregulated after exposure to farnesol	AN5318 cluster	NRPS
AN5317		Ortholog of A. fumigatus Af293 : Afu6g00280, A. oryzae RIB40 : AO090003000248, AO090010000078, Neosartorya fischeri NRRL 181 : NFIA_047440 and Aspergillus versicolor : Aspve1_0031634	AN5318 cluster						AA		AA
AN5316		Ortholog of Aspergillus versicolor : Aspve1_0031636 and Aspergillus sydowii : Aspsy1_0035792	AN5318 cluster
AN5315		Ortholog of A. nidulans FGSC A4 : AN7859, A. niger CBS 513.88 : An01g01450, A. oryzae RIB40 : AO090001000269, Neosartorya fischeri NRRL 181 : NFIA_044920 and Aspergillus wentii : Aspwe1_0166871	AN5318 cluster				AA
AN5314		Has domain(s) with predicted catalytic activity, pyridoxal phosphate binding activity and role in metabolic process	AN5318 cluster
				Number of AtfA or AtfB dependent cluster genes:	0	0	1	0	1	0	1	0
				Number of genes in the cluster:	5	5	5	5	5	5	5	5
				Nmber of AtfA or AtfB depenent genes:	329	96	240	9	1496	439	1143	155
				Totel number of genes:	10775	10775	10775	10775	10775	10775	10775	10775
				p-value (Fisher's exact test):	1	1	0.1065	1	0.5265	1	0.4292	1
GENE ID	Gene name	Description (AspGD)	Cluster	Key gene	AtfA-dependent in untreated mycelial samples	AtfB-dependent in untreated mycelial samples	AtfA-dependent in MSB-treated mycelial samples	AtfB-dependent in MSB-treated mycelial samples	AtfA-dependent in untreated conidial samples	AtfB-dependent in untreated conidial samples	AtfA-dependent in MSB-treated conidial samples	AtfB-dependent in MSB-treated conidial samples
AN9235		Has domain(s) with predicted catalytic activity and role in metabolic process	AN11194 cluster								AA
AN9234		Predicted oxidoreductase; coregulated member of a dimethyl-allyl-tryptophan synthase (DMATS) type aromatic prenyltransferase- and NRPS-containing gene cluster	AN11194 cluster, AN9226 cluster
AN9233		Predicted O-methyltransferase; member of a dimethyl-allyl-tryptophan synthase (DMATS) type aromatic prenyltransferase- and NRPS-containing gene cluster	AN11194 cluster, AN9226 cluster
AN9231		Predicted UDP-N-acetylmuramate dehydrogenase; coregulated member of a dimethyl-allyl-tryptophan synthase (DMATS) type aromatic prenyltransferase- and NRPS-containing gene cluster	AN11194 cluster, AN9226 cluster
AN9230		Predicted monooxygenase; coregulated member of a dimethyl-allyl-tryptophan synthase (DMATS) type aromatic prenyltransferase- and NRPS-containing gene cluster	AN11194 cluster, AN9226 cluster
AN11202		Putative dimethyl-allyl-tryptophan synthase (DMATS) type aromatic prenyltransferase; coregulated member of a DMATS type aromatic prenyltransferase- and NRPS-containing gene cluster	AN11194 cluster, AN9226 cluster	DMATS-type aromatic prenyltransferase
AN11194		Putative dimethyl-allyl-tryptophan synthase (dmats) type aromatic prenyltransferase; coregulated member of a DMATS type aromatic prenyltransferase- and NRPS-containing gene cluster	AN11194 cluster, AN9226 cluster	DMATS-type aromatic prenyltransferase
AN11201		Predicted oxidoreductase; coregulated member of a dimethyl-allyl-tryptophan synthase (DMATS) type aromatic prenyltransferase- and NRPS-containing gene cluster	AN11194 cluster, AN9226 cluster
AN11193		Has domain(s) with predicted oxygen transporter activity; coregulated member of a dimethyl-allyl-tryptophan synthase (DMATS) type aromatic prenyltransferase- and NRPS-containing gene cluster	AN11194 cluster, AN9226 cluster
AN9227		Predicted dioxygenase; coregulated member of a dimethyl-allyl-tryptophan synthase (DMATS) type aromatic prenyltransferase- and NRPS-containing gene cluster	AN11194 cluster, AN9226 cluster
AN9226		Putative nonribosomal peptide synthase (NRPS); coregulated member of a dimethyl-allyl-tryptophan synthase (DMATS) type aromatic prenyltransferase- and NRPS-containing gene cluster	AN11194 cluster, AN9226 cluster	NRPS					AA		AA
AN9225	CYP679A1	Putative cytochrome P450; coregulated member of a dimethyl-allyl-tryptophan synthase (DMATS) type aromatic prenyltransferase- and NRPS-containing gene cluster	AN11194 cluster, AN9226 cluster
AN9224		Predicted monooxygenase; coregulated member of a dimethyl-allyl-tryptophan synthase (DMATS) type aromatic prenyltransferase- and NRPS-containing gene cluster	AN11194 cluster, AN9226 cluster
AN9223		Putative demethylsterigmatocystin 6-O-methyltransferase; coregulatedmember of a dimethyl-allyl-tryptophan synthase (DMATS) type aromatic prenyltransferase- and NRPS-containing gene cluster	AN11194 cluster, AN9226 cluster
				Number of AtfA or AtfB dependent cluster genes:	0	0	0	0	1	0	2	0
				Number of genes in the cluster:	14	14	14	14	14	14	14	14
				Nmber of AtfA or AtfB depenent genes:	329	96	240	9	1496	439	1143	155
				Totel number of genes:	10775	10775	10775	10775	10775	10775	10775	10775
				p-value (Fisher's exact test):	1	1	1	1	0.8768	1	0.4464	1
GENE ID	Gene name	Description (AspGD)	Cluster	Key gene	AtfA-dependent in untreated mycelial samples	AtfB-dependent in untreated mycelial samples	AtfA-dependent in MSB-treated mycelial samples	AtfB-dependent in MSB-treated mycelial samples	AtfA-dependent in untreated conidial samples	AtfB-dependent in untreated conidial samples	AtfA-dependent in MSB-treated conidial samples	AtfB-dependent in MSB-treated conidial samples
AN11200		Ortholog of A. fumigatus Af293 : Afu5g10300, Neosartorya fischeri NRRL 181 : NFIA_076960, Aspergillus fumigatus A1163 : AFUB_057880 and Aspergillus sydowii : Aspsy1_0036837	AN11191 cluster (asperlin)
AN11192	CYP664A1	Putative cytochrome P450	AN11191 cluster (asperlin)						AB	AB
AN9221		Putative transcription factor; predicted role in secondary metabolite production	AN11191 cluster (asperlin)	TF
AN9220		Ortholog of A. fumigatus Af293 : Afu5g10320, A. oryzae RIB40 : AO090001000034, Neosartorya fischeri NRRL 181 : NFIA_076940 and Aspergillus versicolor : Aspve1_0038692	AN11191 cluster (asperlin)
AN9219		Has domain(s) with predicted role in transmembrane transport and integral component of membrane localization	AN11191 cluster (asperlin)
AN9218	CYP540D1	Putative sterol 14-demethylase with a predicted role in sterol metabolism; putative cytochrome P450 family	AN11191 cluster (asperlin)
AN11198		Has domain(s) with predicted heme binding, oxidoreductase activity and role in oxidation-reduction process	AN11191 cluster (asperlin)
AN11199		Predicted dihydrofolate reductase; member of the polyketide synthase (PKS) AN11191 gene cluster	AN11191 cluster (asperlin)
AN11191		Putative polyketide synthase (PKS); gene cluster member with AN11199	AN11191 cluster (asperlin)	PKS
				Number of AtfA or AtfB dependent cluster genes:	0	0	0	0	1	1	0	0
				Number of genes in the cluster:	9	9	9	9	9	9	9	9
				Nmber of AtfA or AtfB depenent genes:	329	96	240	9	1496	439	1143	155
				Totel number of genes:	10775	10775	10775	10775	10775	10775	10775	10775
				p-value (Fisher's exact test):	1	1	1	1	0.7397	0.3124	1	1
GENE ID	Gene name	Description (AspGD)	Cluster	Key gene	AtfA-dependent in untreated mycelial samples	AtfB-dependent in untreated mycelial samples	AtfA-dependent in MSB-treated mycelial samples	AtfB-dependent in MSB-treated mycelial samples	AtfA-dependent in untreated conidial samples	AtfB-dependent in untreated conidial samples	AtfA-dependent in MSB-treated conidial samples	AtfB-dependent in MSB-treated conidial samples
AN9185		Protein of unknown function; transcript is induced by nitrate	No PKS/NRPS backbone 1		AA
AN9184		Ortholog(s) have plasma membrane localization	No PKS/NRPS backbone 1		AA		AA		AA
AN9183	bglR	Putative beta-glucosidase with a predicted role in polysaccharide degradation	No PKS/NRPS backbone 1		A/B	A/B
AN11190		Ortholog(s) have role in cellular response to drug	No PKS/NRPS backbone 1
AN11195		Has domain(s) with predicted DNA binding, DNA-binding transcription factor activity, RNA polymerase II-specific, nucleic acid binding, zinc ion binding activity	No PKS/NRPS backbone 1	TF
AN9181		Ortholog of A. nidulans FGSC A4 : AN8354, AN8970, A. fumigatus Af293 : Afu1g12440, Afu1g12460, Afu6g00230 and A. niger CBS 513.88 : An12g03270, An10g01010, An01g11070, An11g04060, An16g00990	No PKS/NRPS backbone 1
AN9180		Putative transketolase; intracellular; protein abundance decreased by menadione stress	No PKS/NRPS backbone 1		AA		AA		AA		AA
AN9179		Ortholog(s) have extracellular region localization	No PKS/NRPS backbone 1		AA				AA		AA
				Number of AtfA or AtfB dependent cluster genes:	5	1	2	0	3	0	2	0
				Number of genes in the cluster:	8	8	8	8	8	8	8	8
				Nmber of AtfA or AtfB depenent genes:	329	96	240	9	1496	439	1143	155
				Totel number of genes:	10775	10775	10775	10775	10775	10775	10775	10775
				p-value (Fisher's exact test):	1.337e-06	0.06911	0.01266	1	0.08722	1	0.2051	1
GENE ID	Gene name	Description (AspGD)	Cluster	Key gene	AtfA-dependent in untreated mycelial samples	AtfB-dependent in untreated mycelial samples	AtfA-dependent in MSB-treated mycelial samples	AtfB-dependent in MSB-treated mycelial samples	AtfA-dependent in untreated conidial samples	AtfB-dependent in untreated conidial samples	AtfA-dependent in MSB-treated conidial samples	AtfB-dependent in MSB-treated conidial samples
AN9130		Has domain(s) with predicted cholinesterase activity	AN9129 cluster						A-B	A-B	AA
AN9129		Ortholog(s) have role in pathogenesis	AN9129 cluster	NRPS			AA
				Number of AtfA or AtfB dependent cluster genes:	0	0	1	0	1	1	1	0
				Number of genes in the cluster:	2	2	2	2	2	2	2	2
				Nmber of AtfA or AtfB depenent genes:	329	96	240	9	1496	439	1143	155
				Totel number of genes:	10775	10775	10775	10775	10775	10775	10775	10775
				p-value (Fisher's exact test):	1	1	0.04405	1	0.2584	0.07983	0.2009	1
GENE ID	Gene name	Description (AspGD)	Cluster	Key gene	AtfA-dependent in untreated mycelial samples	AtfB-dependent in untreated mycelial samples	AtfA-dependent in MSB-treated mycelial samples	AtfB-dependent in MSB-treated mycelial samples	AtfA-dependent in untreated conidial samples	AtfB-dependent in untreated conidial samples	AtfA-dependent in MSB-treated conidial samples	AtfB-dependent in MSB-treated conidial samples
AN3396	micA	Putative non-ribosomal peptide synthase (NRPS); responsible for microperfuranone biosynthesis; coregulated (with AN3394 and AN3395) secondary metabolism cluster member; transcript repressed by nitrogen limitation	Microperfuranone (mic) cluster	NRPS
AN3395		Protein of unknown function; coregulated (with micA/AN3396 and AN3394) secondary metabolism cluster member	Microperfuranone (mic) cluster		AA
AN3394	CYP620D1	Putative cytochrome P450; putative O-methylsterigmatocystin oxidoreductase; coregulated (with micA/AN3396 and AN3395) secondary metabolism cluster member	Microperfuranone (mic) cluster		AA
				Number of AtfA or AtfB dependent cluster genes:	2	0	0	0	0	0	0	0
				Number of genes in the cluster:	3	3	3	3	3	3	3	3
				Nmber of AtfA or AtfB depenent genes:	329	96	240	9	1496	439	1143	155
				Totel number of genes:	10775	10775	10775	10775	10775	10775	10775	10775
				p-value (Fisher's exact test):	0.002732	1	1	1	1	1	1	1
GENE ID	Gene name	Description (AspGD)	Cluster	Key gene	AtfA-dependent in untreated mycelial samples	AtfB-dependent in untreated mycelial samples	AtfA-dependent in MSB-treated mycelial samples	AtfB-dependent in MSB-treated mycelial samples	AtfA-dependent in untreated conidial samples	AtfB-dependent in untreated conidial samples	AtfA-dependent in MSB-treated conidial samples	AtfB-dependent in MSB-treated conidial samples
AN3386		Putative polyketide synthase; involved in secondary metabolite production	pki cluster	TF
AN3385		Putative transcription factor; predicted role in secondary metabolite production	pki cluster	PKS	A/B	A/B
AN3384		Ortholog(s) have trichothecene 3-O-acetyltransferase activity and role in mycotoxin catabolic process	pki cluster		A/B	A/B
AN3383		Has domain(s) with predicted role in transmembrane transport and integral component of membrane localization	pki cluster
AN3382	salA	Putative salicylate 1-monooxygenase; protein that confers resistance to the antifungal drug terbinafine	pki cluster
AN3381	pkiC	Putative fatty acid synthetase subunit with a predicted role in cytosolic fatty acid formation; involved in secondary metabolite production	pki cluster
AN3380	pkiB	Putative fatty-acyl-CoA synthase with a predicted role in cytosolic fatty acid formation; involved in secondary metabolite production	pki cluster
AN3379		Ortholog of A. fumigatus Af293 : Afu7g01170, A. niger CBS 513.88 : An01g01580, An12g01970, An01g00420, A. oryzae RIB40 : AO090010000104, AO090038000140 and Aspergillus wentii : Aspwe1_0112566	pki cluster				AA
				Number of AtfA or AtfB dependent cluster genes:	2	2	1	0	0	0	0	0
				Number of genes in the cluster:	8	8	8	8	8	8	8	8
				Nmber of AtfA or AtfB depenent genes:	329	96	240	9	1496	439	1143	155
				Totel number of genes:	10775	10775	10775	10775	10775	10775	10775	10775
				p-value (Fisher's exact test):	0.02304	0.002124	0.165	1	1	1	1	1
GENE ID	Gene name	Description (AspGD)	Cluster	Key gene	AtfA-dependent in untreated mycelial samples	AtfB-dependent in untreated mycelial samples	AtfA-dependent in MSB-treated mycelial samples	AtfB-dependent in MSB-treated mycelial samples	AtfA-dependent in untreated conidial samples	AtfB-dependent in untreated conidial samples	AtfA-dependent in MSB-treated conidial samples	AtfB-dependent in MSB-treated conidial samples
AN10401		Ortholog of A. nidulans FGSC A4 : AN6780, A. fumigatus Af293 : Afu7g01210, Aspergillus sydowii : Aspsy1_0029236, Aspsy1_0043488 and Aspergillus terreus NIH2624 : ATET_08673	AN10396 cluster						AB	AB	AB	AB
AN10396		Ortholog(s) have farnesyl-diphosphate farnesyltransferase activity, squalene synthase activity and role in ergosterol biosynthetic process, establishment or maintenance of cell polarity	AN10396 cluster	Farnesyl-diphosphate farnesyltransferase
AN3375		Ortholog of S. cerevisiae : CAJ1, A. fumigatus Af293 : Afu7g01230, A. niger CBS 513.88 : An12g01900, A. oryzae RIB40 : AO090010000203 and Aspergillus wentii : Aspwe1_0042504	AN10396 cluster
				Number of AtfA or AtfB dependent cluster genes:	0	0	0	0	1	1	1	1
				Number of genes in the cluster:	3	3	3	3	3	3	3	3
				Nmber of AtfA or AtfB depenent genes:	329	96	240	9	1496	439	1143	155
				Totel number of genes:	10775	10775	10775	10775	10775	10775	10775	10775
				p-value (Fisher's exact test):	1	1	1	1	0.3614	0.1173	0.2857	0.04254
GENE ID	Gene name	Description (AspGD)	Cluster	Key gene	AtfA-dependent in untreated mycelial samples	AtfB-dependent in untreated mycelial samples	AtfA-dependent in MSB-treated mycelial samples	AtfB-dependent in MSB-treated mycelial samples	AtfA-dependent in untreated conidial samples	AtfB-dependent in untreated conidial samples	AtfA-dependent in MSB-treated conidial samples	AtfB-dependent in MSB-treated conidial samples
AN3287		Has domain(s) with predicted role in transmembrane transport and membrane localization	AN3273 cluster
AN3286		Ortholog of A. nidulans FGSC A4 : AN10390, A. fumigatus Af293 : Afu4g01280, Afu5g00830, A. niger CBS 513.88 : An12g00980, An11g04090, An06g00150 and A. oryzae RIB40 : AO090138000050, AO090010000179	AN3273 cluster
AN3285		Ortholog of A. fumigatus Af293 : Afu4g01270, Neosartorya fischeri NRRL 181 : NFIA_044020, Aspergillus versicolor : Aspve1_0066429 and Aspergillus fumigatus A1163 : AFUB_101760	AN3273 cluster
AN3284		Ortholog of A. fumigatus Af293 : Afu4g07467, A. niger CBS 513.88 : An12g05240, An04g01840, A. oryzae RIB40 : AO090020000271, AO090103000196 and Aspergillus wentii : Aspwe1_0034590, Aspwe1_0053489	AN3273 cluster
AN3283		Has domain(s) with predicted catalytic activity and role in nucleoside metabolic process	AN3273 cluster
AN3282		Protein of unknown function	AN3273 cluster
AN3281	CYP567D1	Putative cytochrome P450	AN3273 cluster
AN3280		Has domain(s) with predicted DNA-binding transcription factor activity, RNA polymerase II-specific, zinc ion binding activity, role in regulation of transcription, DNA-templated and nucleus localization	AN3273 cluster	TF			AA
AN3279		Has domain(s) with predicted oxidoreductase activity and role in metabolic process	AN3273 cluster
AN3278		Ortholog(s) have role in alkaloid biosynthetic process, ergot alkaloid biosynthetic process, secondary metabolite biosynthetic process	AN3273 cluster
AN3277		Has domain(s) with predicted magnesium ion binding, terpene synthase activity	AN3273 cluster	Terpene synthase
AN3276		Putative Type II fatty acid synthase with a predicted role in mitochondrial fatty acid formation	AN3273 cluster				AA
AN3275	CYP567E1	Putative cytochrome P450	AN3273 cluster
AN10402		Has domain(s) with predicted FAD binding, UDP-N-acetylmuramate dehydrogenase activity, flavin adenine dinucleotide binding, oxidoreductase activity, acting on CH-OH group of donors activity and role in oxidation-reduction process	AN3273 cluster
AN10389	CYP654A1	Putative cytochrome P450	AN3273 cluster
AN12188		Has domain(s) with predicted catalytic activity, transferase activity and role in metabolic process	AN3273 cluster
AN3273		Putative polketide synthase	AN3273 cluster	PKS
AN3272	CYP667A1	Putative cytochrome P450	AN3273 cluster
AN3271		Protein of unknown function	AN3273 cluster
AN3270		Has domain(s) with predicted role in transmembrane transport and integral component of membrane localization	AN3273 cluster
AN3269		Has domain(s) with predicted DNA binding, DNA-binding transcription factor activity, RNA polymerase II-specific, zinc ion binding activity and role in regulation of transcription, DNA-templated, transcription, DNA-templated	AN3273 cluster	TF
AN10388		Has domain(s) with predicted FAD binding, UDP-N-acetylmuramate dehydrogenase activity, flavin adenine dinucleotide binding, oxidoreductase activity, oxidoreductase activity, acting on CH-OH group of donors activity	AN3273 cluster
				Number of AtfA or AtfB dependent cluster genes:	0	0	2	0	0	0	0	0
				Number of genes in the cluster:	22	22	22	22	22	22	22	22
				Nmber of AtfA or AtfB depenent genes:	329	96	240	9	1496	439	1143	155
				Totel number of genes:	10775	10775	10775	10775	10775	10775	10775	10775
				p-value (Fisher's exact test):	1	1	0.08527	1	1	1	1	1
GENE ID	Gene name	Description (AspGD)	Cluster	Key gene	AtfA-dependent in untreated mycelial samples	AtfB-dependent in untreated mycelial samples	AtfA-dependent in MSB-treated mycelial samples	AtfB-dependent in MSB-treated mycelial samples	AtfA-dependent in untreated conidial samples	AtfB-dependent in untreated conidial samples	AtfA-dependent in MSB-treated conidial samples	AtfB-dependent in MSB-treated conidial samples
AN3257		Protein of unknown function; predicted secondary metabolism gene cluster member	AN3252 cluster
AN3256	CYP648A1	Putative cytochrome P450; predicted secondary metabolism gene cluster member	AN3252 cluster
AN3255		Predicted glutathione peroxidase; predicted secondary metabolism gene cluster member	AN3252 cluster		AA				AA		AA
AN3254		Predicted transmembrane transporter; predicted secondary metabolism gene cluster member	AN3252 cluster
AN3253	CYP649A1	Putative cytochrome P450; predicted secondary metabolism gene cluster member	AN3252 cluster
AN3252		Protein with homology to entkaurene synthases; predicted backbone enzyme of a secondary metabolism gene cluster	AN3252 cluster	Entkaurene synthase
				Number of AtfA or AtfB dependent cluster genes:	1	0	0	0	1	0	1	0
				Number of genes in the cluster:	6	6	6	6	6	6	6	6
				Nmber of AtfA or AtfB depenent genes:	329	96	240	9	1496	439	1143	155
				Totel number of genes:	10775	10775	10775	10775	10775	10775	10775	10775
				p-value (Fisher's exact test):	0.1698	1	1	1	0.5922	1	0.4898	1
GENE ID	Gene name	Description (AspGD)	Cluster	Key gene	AtfA-dependent in untreated mycelial samples	AtfB-dependent in untreated mycelial samples	AtfA-dependent in MSB-treated mycelial samples	AtfB-dependent in MSB-treated mycelial samples	AtfA-dependent in untreated conidial samples	AtfB-dependent in untreated conidial samples	AtfA-dependent in MSB-treated conidial samples	AtfB-dependent in MSB-treated conidial samples
AN3230	pkfA	Polyketide synthase; predicted backbone enzyme of the aspernidine A secondary metabolism gene cluster	pkf cluster	PKS					AA		AA
AN3229	pkfF	Putative aryl-alcohol oxidase-related protein; choline dehydrogenase; aspernidine A secondary metabolism gene cluster member	pkf cluster						AA		AA
AN3228	pkfE	Predicted prenyltransferase; aspernidine A secondary metabolism gene cluster member	pkf cluster
AN3227	pkfD	Predicted monooxygenase; aspernidine A secondary metabolism gene cluster member	pkf cluster
AN3226	pkfC	Has domain protein; aspernidine A secondary metabolism gene cluster member; protein levels decrease in response to farnesol	pkf cluster
AN3225	CYP631B1	Putative cytochrome P450; aspernidine A secondary metabolism gene cluster member	pkf cluster
				Number of AtfA or AtfB dependent cluster genes:	0	0	0	0	2	0	2	0
				Number of genes in the cluster:	6	6	6	6	6	6	6	6
				Nmber of AtfA or AtfB depenent genes:	329	96	240	9	1496	439	1143	155
				Totel number of genes:	10775	10775	10775	10775	10775	10775	10775	10775
				p-value (Fisher's exact test):	1	1	1	1	0.1976	1	0.1264	1
GENE ID	Gene name	Description (AspGD)	Cluster	Key gene	AtfA-dependent in untreated mycelial samples	AtfB-dependent in untreated mycelial samples	AtfA-dependent in MSB-treated mycelial samples	AtfB-dependent in MSB-treated mycelial samples	AtfA-dependent in untreated conidial samples	AtfB-dependent in untreated conidial samples	AtfA-dependent in MSB-treated conidial samples	AtfB-dependent in MSB-treated conidial samples
AN2924		Putative nonribosomal peptide synthetase (NRPS)-like enzyme	AN2924 cluster	NRPS	A/B	A/B
AN2923		Ortholog of A. nidulans FGSC A4 : AN10601, A. fumigatus Af293 : Afu2g17770, Afu8g00650, A. niger CBS 513.88 : An11g02090, An01g01000 and A. oryzae RIB40 : AO090020000174, AO090103000301	AN2924 cluster				AA
AN2922		Ortholog of A. nidulans FGSC A4 : AN1515, AN7536, A. niger CBS 513.88 : An12g10030, A. oryzae RIB40 : AO090701000305, AO090102000038, AO090124000043 and Aspergillus wentii : Aspwe1_0030521	AN2924 cluster				AA
AN2921		Ortholog of A. nidulans FGSC A4 : AN4177, AN12488, A. fumigatus Af293 : Afu8g00600, A. niger CBS 513.88 : An03g00920, An02g01430, A. oryzae RIB40 : AO090010000696 and Aspergillus wentii : Aspwe1_0029035	AN2924 cluster		AA
				Number of AtfA or AtfB dependent cluster genes:	2	1	2	0	0	0	0	0
				Number of genes in the cluster:	4	4	4	4	4	4	4	4
				Nmber of AtfA or AtfB depenent genes:	329	96	240	9	1496	439	1143	155
				Totel number of genes:	10775	10775	10775	10775	10775	10775	10775	10775
				p-value (Fisher's exact test):	0.005354	0.03517	0.002878	1	1	1	1	1
GENE ID	Gene name	Description (AspGD)	Cluster	Key gene	AtfA-dependent in untreated mycelial samples	AtfB-dependent in untreated mycelial samples	AtfA-dependent in MSB-treated mycelial samples	AtfB-dependent in MSB-treated mycelial samples	AtfA-dependent in untreated conidial samples	AtfB-dependent in untreated conidial samples	AtfA-dependent in MSB-treated conidial samples	AtfB-dependent in MSB-treated conidial samples
AN2623	aatA	Isopenicillin-N N-acyltransferase; null produces reduced levels of penicillin; partially redundant with aatB	Penicillin cluster
AN2622	ipnA	Isopenicillin-N synthase with a role in penicillin biosynthesis; expression is negatively regulated by glucose and acidic pH	Penicillin cluster
AN2621	acvA	Delta-(L-alpha-aminoadipyl)-L-cysteinyl-D-valine synthetase, nonribosomal peptide synthase, the first enzyme of the penicillin biosynthesis pathway	Penicillin cluster	NRPS
				Number of AtfA or AtfB dependent cluster genes:	0	0	0	0	0	0	0	0
				Number of genes in the cluster:	3	3	3	3	3	3	3	3
				Nmber of AtfA or AtfB depenent genes:	329	96	240	9	1496	439	1143	155
				Totel number of genes:	10775	10775	10775	10775	10775	10775	10775	10775
				p-value (Fisher's exact test):	1	1	1	1	1	1	1	1
GENE ID	Gene name	Description (AspGD)	Cluster	Key gene	AtfA-dependent in untreated mycelial samples	AtfB-dependent in untreated mycelial samples	AtfA-dependent in MSB-treated mycelial samples	AtfB-dependent in MSB-treated mycelial samples	AtfA-dependent in untreated conidial samples	AtfB-dependent in untreated conidial samples	AtfA-dependent in MSB-treated conidial samples	AtfB-dependent in MSB-treated conidial samples
AN9007	CYP548D1	Putative cytochrome P450; predicted secondary metabolism gene cluster member	AN9005 cluster						A-B	A-B
AN9006		Protein of unknown function; predicted secondary metabolism gene cluster member	AN9005 cluster
AN9005		Putative polyketide synthase (PKS); predicted backbone enzyme of a secondary metabolism gene cluster	AN9005 cluster	PKS	AA		AA		AB	AB	AB	AB
AN9004		Predicted monooxygenase	AN9005 cluster
AN9003		Has domain(s) with predicted zinc ion binding activity	AN9005 cluster
AN9002		Predicted monooxygenase; predicted secondary metabolism gene cluster member	AN9005 cluster		AA				A-B	A-B	AA
				Number of AtfA or AtfB dependent cluster genes:	2	0	1	0	3	3	2	1
				Number of genes in the cluster:	6	6	6	6	6	6	6	6
				Nmber of AtfA or AtfB depenent genes:	329	96	240	9	1496	439	1143	155
				Totel number of genes:	10775	10775	10775	10775	10775	10775	10775	10775
				p-value (Fisher's exact test):	0.01285	1	0.1264	1	0.03855	0.001225	0.1264	0.08328
GENE ID	Gene name	Description (AspGD)	Cluster	Key gene	AtfA-dependent in untreated mycelial samples	AtfB-dependent in untreated mycelial samples	AtfA-dependent in MSB-treated mycelial samples	AtfB-dependent in MSB-treated mycelial samples	AtfA-dependent in untreated conidial samples	AtfB-dependent in untreated conidial samples	AtfA-dependent in MSB-treated conidial samples	AtfB-dependent in MSB-treated conidial samples
AN8910		Putative polyketide synthase (PKS)	AN8910 cluster	PKS
AN8909		Protein of unknown function	AN8910 cluster
AN8908		Ortholog of A. fumigatus Af293 : Afu8g00630, A. niger CBS 513.88 : An07g00510, A. oryzae RIB40 : AO090009000111 and Aspergillus sydowii : Aspsy1_0162791, Aspsy1_0212146	AN8910 cluster
AN12240		Ortholog of Aspergillus versicolor : Aspve1_0089632	AN8910 cluster
AN8907		Putative C-4 sterol methyl oxidase with a predicted role in sterol metabolism	AN8910 cluster
AN8906		Ortholog of A. fumigatus Af293 : Afu8g02420, A. niger CBS 513.88 : An03g06440, A. oryzae RIB40 : AO090010000669 and Aspergillus wentii : Aspwe1_0122188	AN8910 cluster
AN8905	CYP537B1	Putative cytochrome P450	AN8910 cluster
				Number of AtfA or AtfB dependent cluster genes:	0	0	0	0	0	0	0	0
				Number of genes in the cluster:	7	7	7	7	7	7	7	7
				Nmber of AtfA or AtfB depenent genes:	329	96	240	9	1496	439	1143	155
				Totel number of genes:	10775	10775	10775	10775	10775	10775	10775	10775
				p-value (Fisher's exact test):	1	1	1	1	1	1	1	1
GENE ID	Gene name	Description (AspGD)	Cluster	Key gene	AtfA-dependent in untreated mycelial samples	AtfB-dependent in untreated mycelial samples	AtfA-dependent in MSB-treated mycelial samples	AtfB-dependent in MSB-treated mycelial samples	AtfA-dependent in untreated conidial samples	AtfB-dependent in untreated conidial samples	AtfA-dependent in MSB-treated conidial samples	AtfB-dependent in MSB-treated conidial samples
AN1592		Putative GGPP-synthase; member of the PbcR-activated diterpene cluster	AN1594 cluster
AN1593		Putative 3-hydroxy-3-methylglutaryl-coenzyme A (HMG-CoA) reductase isozyme with a predicted role in sterol metabolism; member of the PbcR-activated diterpene cluster	AN1594 cluster
AN1594		Protein with homology to entkaurene synthases; member of the PbcR-activated diterpene cluster	AN1594 cluster	entkaurene synthases					AA		AA
AN1595		Putative elongation factor 1-gamma; member of the PbcR-activated diterpene cluster	AN1594 cluster						AA		AA
AN1596		Putative short-chain dehydrogenase; member of the PbcR-activated diterpene cluster	AN1594 cluster						AA		AA
AN1597		Protein of unknown function; member of the PbcR-activated diterpene cluster	AN1594 cluster						AA		AA
AN1598	CYP503B1	Putative cytochrome P450; member of the PbcR-activated diterpene cluster	AN1594 cluster
AN1599	pbcR	Zn(II)(2)Cys(6)-type transcription factor; responsible for the production of the diterpene compound, ent-pimara-8(14),15-diene; member of the PbcR-activated diterpene cluster	AN1594 cluster	TF			AA
				Number of AtfA or AtfB dependent cluster genes:	0	0	1	0	4	0	4	0
				Number of genes in the cluster:	8	8	8	8	8	8	8	8
				Nmber of AtfA or AtfB depenent genes:	329	96	240	9	1496	439	1143	155
				Totel number of genes:	10775	10775	10775	10775	10775	10775	10775	10775
				p-value (Fisher's exact test):	1	1	0.165	1	0.01627	1	0.006208	1
GENE ID	Gene name	Description (AspGD)	Cluster	Key gene	AtfA-dependent in untreated mycelial samples	AtfB-dependent in untreated mycelial samples	AtfA-dependent in MSB-treated mycelial samples	AtfB-dependent in MSB-treated mycelial samples	AtfA-dependent in untreated conidial samples	AtfB-dependent in untreated conidial samples	AtfA-dependent in MSB-treated conidial samples	AtfB-dependent in MSB-treated conidial samples
AN1678		Putative transcription factor; predicted role in secondary metabolite production	AN1680 cluster	TF
AN1679		Putative oxidoreductase with a predicted role in carbohydrate metabolism	AN1680 cluster
AN1680		Putative nonribosomal peptide synthase (NRPS)-like enzyme	AN1680 cluster	NRPS					AA		AA
AN1681		Has domain(s) with predicted role in transmembrane transport and integral component of membrane localization	AN1680 cluster
				Number of AtfA or AtfB dependent cluster genes:	0	0	0	0	1	0	1	0
				Number of genes in the cluster:	4	4	4	4	4	4	4	4
				Nmber of AtfA or AtfB depenent genes:	329	96	240	9	1496	439	1143	155
				Totel number of genes:	10775	10775	10775	10775	10775	10775	10775	10775
				p-value (Fisher's exact test):	1	1	1	1	0.4501	1	0.3615	1
GENE ID	Gene name	Description (AspGD)	Cluster	Key gene	AtfA-dependent in untreated mycelial samples	AtfB-dependent in untreated mycelial samples	AtfA-dependent in MSB-treated mycelial samples	AtfB-dependent in MSB-treated mycelial samples	AtfA-dependent in untreated conidial samples	AtfB-dependent in untreated conidial samples	AtfA-dependent in MSB-treated conidial samples	AtfB-dependent in MSB-treated conidial samples
AN1784		Putative polyketide synthase; predicted secondary metabolism gene cluster member	AN1784 cluster	PKS
AN1785		Protein of unknown function; predicted secondary metabolism gene cluster member; coregulated with the PKS AN1784	AN1784 cluster
AN1786		Predicted monooxygenase; predicted secondary metabolism gene cluster member; coregulated with the PKS AN1784	AN1784 cluster
AN1787		Predicted UDP-N-acetylmuramate dehydrogenase; predicted secondary metabolism gene cluster member; coregulated with the PKS AN1784	AN1784 cluster						AA
				Number of AtfA or AtfB dependent cluster genes:	0	0	0	0	1	0	0	0
				Number of genes in the cluster:	4	4	4	4	4	4	4	4
				Nmber of AtfA or AtfB depenent genes:	329	96	240	9	1496	439	1143	155
				Totel number of genes:	10775	10775	10775	10775	10775	10775	10775	10775
				p-value (Fisher's exact test):	1	1	1	1	0.4501	1	1	1
GENE ID	Gene name	Description (AspGD)	Cluster	Key gene	AtfA-dependent in untreated mycelial samples	AtfB-dependent in untreated mycelial samples	AtfA-dependent in MSB-treated mycelial samples	AtfB-dependent in MSB-treated mycelial samples	AtfA-dependent in untreated conidial samples	AtfB-dependent in untreated conidial samples	AtfA-dependent in MSB-treated conidial samples	AtfB-dependent in MSB-treated conidial samples
AN1792		Has domain(s) with predicted hydrolase activity, hydrolase activity, acting on ester bonds activity and role in lipid metabolic process	AN1793 cluster								A-B	A-B
AN1794	CYP682D1	Putative cytochrome P450; expression reduced after exposure to farnesol	AN1793 cluster						AA
AN1793		Has domain(s) with predicted magnesium ion binding, terpene synthase activity	AN1793 cluster	Terpene synthase
AN1795		Ortholog(s) have cobalt ion transmembrane transporter activity, zinc ion transmembrane transporter activity	AN1793 cluster						AA
AN1796		Ortholog(s) have role in DNA repair, GPI anchor biosynthetic process, hyphal growth and endoplasmic reticulum localization	AN1793 cluster
				Number of AtfA or AtfB dependent cluster genes:	0	0	0	0	2	0	1	1
				Number of genes in the cluster:	5	5	5	5	5	5	5	5
				Nmber of AtfA or AtfB depenent genes:	329	96	240	9	1496	439	1143	155
				Totel number of genes:	10775	10775	10775	10775	10775	10775	10775	10775
				p-value (Fisher's exact test):	1	1	1	1	0.1446	1	0.4292	0.0699
GENE ID	Gene name	Description (AspGD)	Cluster	Key gene	AtfA-dependent in untreated mycelial samples	AtfB-dependent in untreated mycelial samples	AtfA-dependent in MSB-treated mycelial samples	AtfB-dependent in MSB-treated mycelial samples	AtfA-dependent in untreated conidial samples	AtfB-dependent in untreated conidial samples	AtfA-dependent in MSB-treated conidial samples	AtfB-dependent in MSB-treated conidial samples
AN2030		Predicted oxidoreductase; predicted secondary metabolism gene cluster member	pkh cluster
AN2031		Protein of unknown function; predicted secondary metabolism gene cluster member	pkh cluster
AN2032	pkhA	Putative polyketide synthase; involved in secondary metabolite production	pkh cluster	PKS
AN2033		Predicted monooxygenase; predicted secondary metabolism gene cluster member	pkh cluster
AN2034		Protein of unknown function; predicted secondary metabolism gene cluster member	pkh cluster
AN2035	pkhB	Putative polyketide synthase; involved in secondary metabolite production	pkh cluster	PKS
AN2036		Putative transcription factor; predicted role in secondary metabolite production; predicted secondary metabolism gene cluster member	pkh cluster	TF
AN2037		Predicted NAD binding oxidoreductase; predicted secondary metabolism gene cluster member	pkh cluster						AA
AN2038		Predicted oxidoreductase; predicted secondary metabolism gene cluster member	pkh cluster								AA
				Number of AtfA or AtfB dependent cluster genes:	0	0	0	0	1	0	1	0
				Number of genes in the cluster:	9	9	9	9	9	9	9	9
				Nmber of AtfA or AtfB depenent genes:	329	96	240	9	1496	439	1143	155
				Totel number of genes:	10775	10775	10775	10775	10775	10775	10775	10775
				p-value (Fisher's exact test):	1	1	1	1	0.7397	1	0.6356	1
GENE ID	Gene name	Description (AspGD)	Cluster	Key gene	AtfA-dependent in untreated mycelial samples	AtfB-dependent in untreated mycelial samples	AtfA-dependent in MSB-treated mycelial samples	AtfB-dependent in MSB-treated mycelial samples	AtfA-dependent in untreated conidial samples	AtfB-dependent in untreated conidial samples	AtfA-dependent in MSB-treated conidial samples	AtfB-dependent in MSB-treated conidial samples
AN10289		Putative dimethyl-allyl-tryptophan synthase (DMATS)-type aromatic prenyltransferase; transcript is induced by nitrate	AN10289 cluster	DMATS-type aromatic prenyltransferase					AA
AN10295		Has domain(s) with predicted DNA binding activity	AN10289 cluster	TF
AN2346		Protein of unknown function	AN10289 cluster
AN12125		Protein of unknown function	AN10289 cluster
AN2347	CYP504E4P	Putative cytochrome P450; possibly a pseudogene	AN10289 cluster
				Number of AtfA or AtfB dependent cluster genes:	0	0	0	0	1	0	0	0
				Number of genes in the cluster:	5	5	5	5	5	5	5	5
				Nmber of AtfA or AtfB depenent genes:	329	96	240	9	1496	439	1143	155
				Totel number of genes:	10775	10775	10775	10775	10775	10775	10775	10775
				p-value (Fisher's exact test):	1	1	1	1	0.5265	1	1	1
GENE ID	Gene name	Description (AspGD)	Cluster	Key gene	AtfA-dependent in untreated mycelial samples	AtfB-dependent in untreated mycelial samples	AtfA-dependent in MSB-treated mycelial samples	AtfB-dependent in MSB-treated mycelial samples	AtfA-dependent in untreated conidial samples	AtfB-dependent in untreated conidial samples	AtfA-dependent in MSB-treated conidial samples	AtfB-dependent in MSB-treated conidial samples
AN2396		Has domain(s) with predicted NAD binding, catalytic activity, coenzyme binding, oxidoreductase activity, acting on the aldehyde or oxo group of donors, NAD or NADP as acceptor activity	AN10297 cluster
AN2397		Ortholog of A. fumigatus Af293 : Afu8g06960, Aspergillus flavus NRRL 3357 : AFL2T_05473, Neosartorya fischeri NRRL 181 : NFIA_099650 and Aspergillus versicolor : Aspve1_0026050	AN10297 cluster
AN2398		Has domain(s) with predicted O-methyltransferase activity	AN10297 cluster
AN2399		Protein of unknown function	AN10297 cluster
AN2400		Protein of unknown function	AN10297 cluster
AN12115		Protein of unknown function	AN10297 cluster						AA		AA
AN12116		Has domain(s) with predicted role in transmembrane transport and integral component of membrane localization	AN10297 cluster						A-B	A-B	AA
AN2402		Has domain(s) with predicted oxidoreductase activity and role in metabolic process	AN10297 cluster						AA		AA
AN10300		Has domain(s) with predicted DNA-binding transcription factor activity, RNA polymerase II-specific, zinc ion binding activity, role in regulation of transcription, DNA-templated and nucleus localization	AN10297 cluster	TF					AA
AN10297		Protein with similarity to nonribosomal peptide synthases (NRPS-like); putative acyl CoA synthetase with an NAD-binding domain	AN10297 cluster		A/B	A/B	AA		A-B	A-B
AN2404		Ortholog of A. fumigatus Af293 : Afu8g05810, A. niger CBS 513.88 : An15g04670, A. oryzae RIB40 : AO090005000570, Aspergillus wentii : Aspwe1_0118486 and Aspergillus sydowii : Aspsy1_0039439	AN10297 cluster		A-B	A-B	AA		A-B	A-B	AA
AN2405		Ortholog of A. fumigatus Af293 : Afu2g14390, A. oryzae RIB40 : AO090023000066, Neosartorya fischeri NRRL 181 : NFIA_089560, Aspergillus wentii : Aspwe1_0046658 and Aspergillus versicolor : Aspve1_0025636	AN10297 cluster
AN12119		Ortholog of A. nidulans FGSC A4 : AN12185, A. fumigatus Af293 : Afu2g14380, A. niger CBS 513.88 : An03g05760 and Neosartorya fischeri NRRL 181 : NFIA_089550	AN10297 cluster
AN2406		Ortholog(s) have intracellular localization	AN10297 cluster
AN2407		Has domain(s) with predicted role in isoprenoid biosynthetic process	AN10297 cluster		A/B	A/B
				Number of AtfA or AtfB dependent cluster genes:	3	3	2	0	6	3	4	0
				Number of genes in the cluster:	15	15	15	15	15	15	15	15
				Nmber of AtfA or AtfB depenent genes:	329	96	240	9	1496	439	1143	155
				Totel number of genes:	10775	10775	10775	10775	10775	10775	10775	10775
				p-value (Fisher's exact test):	0.009769	0.0002885	0.04287	1	0.01157	0.02121	0.0664	1
GENE ID	Gene name	Description (AspGD)	Cluster	Key gene	AtfA-dependent in untreated mycelial samples	AtfB-dependent in untreated mycelial samples	AtfA-dependent in MSB-treated mycelial samples	AtfB-dependent in MSB-treated mycelial samples	AtfA-dependent in untreated conidial samples	AtfB-dependent in untreated conidial samples	AtfA-dependent in MSB-treated conidial samples	AtfB-dependent in MSB-treated conidial samples
AN2545	easA	Putative nonribosomal peptide synthetase; emericellamide synthetase; required for emericellamide biosynthesis; emericellamide (eas) biosynthetic gene cluster member	Emericellamide (eas) cluster	NRPS			AA
AN2546		Predicted glycosylphosphatidylinositol (GPI)-anchored protein; embedded within the emericellamide (eas) biosynthetic gene cluster	Emericellamide (eas) cluster		A/B	A/B	AA
AN2547	easB	Putative polyketide synthase; required for emericellamide biosynthesis	Emericellamide (eas) cluster	PKS	A/B	A/B	AA
AN2548	easC	Putative acyltransferase; required for emericellamide biosynthesis; emericellamide (eas) biosynthetic gene cluster member	Emericellamide (eas) cluster		A/B	A/B	AA
AN2549	easD	Putative acyl-CoA ligase; required for emericellamide biosynthesis; emericellamide (eas) biosynthetic gene cluster member	Emericellamide (eas) cluster		A/B	A/B	AA
				Number of AtfA or AtfB dependent cluster genes:	4	4	5	0	0	0	0	0
				Number of genes in the cluster:	5	5	5	5	5	5	5	5
				Nmber of AtfA or AtfB depenent genes:	329	96	240	9	1496	439	1143	155
				Totel number of genes:	10775	10775	10775	10775	10775	10775	10775	10775
				p-value (Fisher's exact test):	4.166e-06	2.939e-08	5.262e-09	1	1	1	1	1
GENE ID	Gene name	Description (AspGD)	Cluster	Key gene	AtfA-dependent in untreated mycelial samples	AtfB-dependent in untreated mycelial samples	AtfA-dependent in MSB-treated mycelial samples	AtfB-dependent in MSB-treated mycelial samples	AtfA-dependent in untreated conidial samples	AtfB-dependent in untreated conidial samples	AtfA-dependent in MSB-treated conidial samples	AtfB-dependent in MSB-treated conidial samples
AN9244		Putative nonribosomal peptide synthase	Austinol (aus) cluster 1	NRPS
AN9245		Has domain(s) with predicted catalytic activity and role in metabolic process	Austinol (aus) cluster 1
AN9246	ausE	Predicted dioxygenase; required for austinol and dehydroaustinol biosynthesis	Austinol (aus) cluster 1
AN9247	ausF	Protein required for normal levels of austinol and dehydroaustinol production	Austinol (aus) cluster 1
AN9248	CYP650B1	Putative cytochrome P450; required for austinol and dehydroaustinol biosynthesis	Austinol (aus) cluster 1
AN9249	ausH	Protein required for austinol and dehydroaustinol biosynthesis	Austinol (aus) cluster 1
AN9250		Ortholog(s) have role in alkaloid biosynthetic process, ergot alkaloid biosynthetic process, secondary metabolite biosynthetic process	Austinol (aus) cluster 1
AN9251	CYP650A1	Putative cytochrome P450	Austinol (aus) cluster 1
AN9252		Ortholog of Aspergillus glaucus : Aspgl1_0083762, Neosartorya fischeri NRRL 181 : NFIA_101490, NFIA_101510, Aspergillus wentii : Aspwe1_0735355 and Aspergillus versicolor : Aspve1_0046577	Austinol (aus) cluster 1
AN9253	CYP651A1	Putative cytochrome P450; required for austinol and dehydroaustinol biosynthesis	Austinol (aus) cluster 1
				Number of AtfA or AtfB dependent cluster genes:	0	0	0	0	0	0	0	0
				Number of genes in the cluster:	10	10	10	10	10	10	10	10
				Nmber of AtfA or AtfB depenent genes:	329	96	240	9	1496	439	1143	155
				Totel number of genes:	10775	10775	10775	10775	10775	10775	10775	10775
				p-value (Fisher's exact test):	1	1	1	1	1	1	1	1
GENE ID	Gene name	Description (AspGD)	Cluster	Key gene	AtfA-dependent in untreated mycelial samples	AtfB-dependent in untreated mycelial samples	AtfA-dependent in MSB-treated mycelial samples	AtfB-dependent in MSB-treated mycelial samples	AtfA-dependent in untreated conidial samples	AtfB-dependent in untreated conidial samples	AtfA-dependent in MSB-treated conidial samples	AtfB-dependent in MSB-treated conidial samples
AN11820		Putative nonribosomal peptide sythetase (NRPS)-like enzyme	AN9291 (AN11820) cluster	NRPS							AA
AN11821		Has domain(s) with predicted role in transmembrane transport and integral component of membrane localization	AN9291 (AN11820) cluster
AN9292		Ortholog(s) have role in positive regulation of secondary metabolite biosynthetic process, regulation of secondary metabolic process, secondary metabolite biosynthetic process	AN9291 (AN11820) cluster	TF
AN9293		Has domain(s) with predicted DNA-binding transcription factor activity, RNA polymerase II-specific, zinc ion binding activity, role in regulation of transcription, DNA-templated and nucleus localization	AN9291 (AN11820) cluster	TF
AN9294		Has domain(s) with predicted role in transmembrane transport and integral component of membrane localization	AN9291 (AN11820) cluster
				Number of AtfA or AtfB dependent cluster genes:	0	0	0	0	0	0	1	0
				Number of genes in the cluster:	5	5	5	5	5	5	5	5
				Nmber of AtfA or AtfB depenent genes:	329	96	240	9	1496	439	1143	155
				Totel number of genes:	10775	10775	10775	10775	10775	10775	10775	10775
				p-value (Fisher's exact test):	1	1	1	1	1	1	0.4292	1
GENE ID	Gene name	Description (AspGD)	Cluster	Key gene	AtfA-dependent in untreated mycelial samples	AtfB-dependent in untreated mycelial samples	AtfA-dependent in MSB-treated mycelial samples	AtfB-dependent in MSB-treated mycelial samples	AtfA-dependent in untreated conidial samples	AtfB-dependent in untreated conidial samples	AtfA-dependent in MSB-treated conidial samples	AtfB-dependent in MSB-treated conidial samples
AN9313	CYP58D1	Putative cytochrome P450; secondary metabolism gene cluster member with AN9314	AN9314 cluster
AN9314		Protein with homology to entkaurene synthases; prediction backbone enzyme of a secondary metabolite biosynthesis gene cluster	AN9314 cluster	Entkaurene synthase	AA
				Number of AtfA or AtfB dependent cluster genes:	1	0	0	0	0	0	0	0
				Number of genes in the cluster:	2	2	2	2	2	2	2	2
				Nmber of AtfA or AtfB depenent genes:	329	96	240	9	1496	439	1143	155
				Totel number of genes:	10775	10775	10775	10775	10775	10775	10775	10775
				p-value (Fisher's exact test):	0.06014	1	1	1	1	1	1	1
GENE ID	Gene name	Description (AspGD)	Cluster	Key gene	AtfA-dependent in untreated mycelial samples	AtfB-dependent in untreated mycelial samples	AtfA-dependent in MSB-treated mycelial samples	AtfB-dependent in MSB-treated mycelial samples	AtfA-dependent in untreated conidial samples	AtfB-dependent in untreated conidial samples	AtfA-dependent in MSB-treated conidial samples	AtfB-dependent in MSB-treated conidial samples
AN1247		Has domain(s) with predicted integral component of membrane localization	AN1242 cluster						AA		AA
AN1246	pgkA	Putative phosphoglycerate kinase with a predicted role in gluconeogenesis and glycolysis; intracellular, menadione stress-induced protein; promoter activity is greater on gluconeogenic than on glycolytic carbon sources	AN1242 cluster						AA		AA
AN1245		Has domain(s) with predicted role in mRNA export from nucleus, proteasome assembly and proteasome regulatory particle, lid subcomplex localization	AN1242 cluster
AN1244		Ortholog of S. cerevisiae : YKR018C, A. fumigatus Af293 : Afu1g10360, A. niger CBS 513.88 : An08g02280, Aspergillus wentii : Aspwe1_0036570 and Aspergillus sydowii : Aspsy1_0025503	AN1242 cluster
AN1243		Has domain(s) with predicted role in transmembrane transport and integral component of membrane localization	AN1242 cluster						AA		AA
AN1242		Putative nonribosomal peptide synthase (NRPS) involved in nidulanin A biosynthesis; predicted backbone enzyme of the secondary metabolite gene cluster	AN1242 cluster	NRPS
				Number of AtfA or AtfB dependent cluster genes:	0	0	0	0	3	0	3	0
				Number of genes in the cluster:	6	6	6	6	6	6	6	6
				Nmber of AtfA or AtfB depenent genes:	329	96	240	9	1496	439	1143	155
				Totel number of genes:	10775	10775	10775	10775	10775	10775	10775	10775
				p-value (Fisher's exact test):	1	1	1	1	0.03855	1	0.01861	1
GENE ID	Gene name	Description (AspGD)	Cluster	Key gene	AtfA-dependent in untreated mycelial samples	AtfB-dependent in untreated mycelial samples	AtfA-dependent in MSB-treated mycelial samples	AtfB-dependent in MSB-treated mycelial samples	AtfA-dependent in untreated conidial samples	AtfB-dependent in untreated conidial samples	AtfA-dependent in MSB-treated conidial samples	AtfB-dependent in MSB-treated conidial samples
AN1036	afoG	Putative polyketide synthase; required for asperfuranone biosynthesis; transcriptionally induced by scrP overexpression	Asperfuranone (afo) cluster	PKS
AN11287		Protein of unknown function	Asperfuranone (afo) cluster
AN1035	afoF	Putative FAD/FMN-dependent oxygenase; required for asperfuranone biosynthesis	Asperfuranone (afo) cluster
AN1034	afoE	Putative polyketide synthase; required for asperfuranone biosynthesis; transcriptionally induced by scrP overexpression	Asperfuranone (afo) cluster	PKS
AN1033	afoD	Putative salicylate hydroxylase; required for asperfuranone biosynthesis; transcriptionally induced by scrP overexpression	Asperfuranone (afo) cluster
AN1032	afoC	Putative oxidoreductase; required for asperfuranone biosynthesis	Asperfuranone (afo) cluster
AN1031	afoB	Putative efflux pump; involved in asperfuranone biosynthesis	Asperfuranone (afo) cluster
AN1030		Has domain(s) with predicted oxidoreductase activity, transferase activity, transferring acyl groups other than amino-acyl groups activity and role in oxidation-reduction process	Asperfuranone (afo) cluster
AN1029	afoA	Protein with homology to CtnR, citrinin biosynthesis transcriptional activator; contains a Zn(2)Cys(6) domain; involved in asperfuranone biosynthesis; overexpression induces expression of the asperfuranone biosynthesis gene cluster	Asperfuranone (afo) cluster	TF
				Number of AtfA or AtfB dependent cluster genes:	0	0	0	0	0	0	0	0
				Number of genes in the cluster:	9	9	9	9	9	9	9	9
				Nmber of AtfA or AtfB depenent genes:	329	96	240	9	1496	439	1143	155
				Totel number of genes:	10775	10775	10775	10775	10775	10775	10775	10775
				p-value (Fisher's exact test):	1	1	1	1	1	1	1	1
GENE ID	Gene name	Description (AspGD)	Cluster	Key gene	AtfA-dependent in untreated mycelial samples	AtfB-dependent in untreated mycelial samples	AtfA-dependent in MSB-treated mycelial samples	AtfB-dependent in MSB-treated mycelial samples	AtfA-dependent in untreated conidial samples	AtfB-dependent in untreated conidial samples	AtfA-dependent in MSB-treated conidial samples	AtfB-dependent in MSB-treated conidial samples
AN0660	furA	Putative allantoin transporter; transcript is induced by allantoin and by uric acid and is repressed by ammonium	No PKS/NRPS backbone 3						A/B	A/B	AA
AN0659		Ortholog of A. fumigatus Af293 : Afu1g13200, A. niger CBS 513.88 : An08g06230, A. oryzae RIB40 : AO090012001040, Aspergillus wentii : Aspwe1_0051321 and Aspergillus sydowii : Aspsy1_0065853	No PKS/NRPS backbone 3
AN11278		Ortholog(s) have role in cristae formation, membrane organization and MICOS complex, mitochondrial crista junction localization	No PKS/NRPS backbone 3
AN0658		Has domain(s) with predicted DNA binding, DNA-binding transcription factor activity, copper ion binding activity, role in regulation of transcription, DNA-templated and host cell nucleus, nucleus localization	No PKS/NRPS backbone 3	TF
AN0657		Ortholog(s) have mitochondrial outer membrane localization	No PKS/NRPS backbone 3
AN0656		Protein expressed at increased levels during osmoadaptation; contains conserved UbiE, methylase domain involved in ubiquinone/menaquinone biosynthesis	No PKS/NRPS backbone 3
AN0655	sepM	Protein with homology to Schizosaccharomyces pombe Cdc14p, a component of the septation initiation network (SIN)-complex	No PKS/NRPS backbone 3
AN0654		Ortholog(s) have farnesyltranstransferase activity and role in terpenoid biosynthetic process	No PKS/NRPS backbone 3
AN0653		Ortholog of S. cerevisiae : YPL199C, Neosartorya fischeri NRRL 181 : NFIA_012370, Aspergillus wentii : Aspwe1_0172006, Aspergillus versicolor : Aspve1_0253586 and Aspergillus clavatus NRRL 1 : ACLA_022320	No PKS/NRPS backbone 3	TF
				Number of AtfA or AtfB dependent cluster genes:	0	0	0	0	1	1	1	0
				Number of genes in the cluster:	9	9	9	9	9	9	9	9
				Nmber of AtfA or AtfB depenent genes:	329	96	240	9	1496	439	1143	155
				Totel number of genes:	10775	10775	10775	10775	10775	10775	10775	10775
				p-value (Fisher's exact test):	1	1	1	1	0.7397	0.3124	0.6356	1
GENE ID	Gene name	Description (AspGD)	Cluster	Key gene	AtfA-dependent in untreated mycelial samples	AtfB-dependent in untreated mycelial samples	AtfA-dependent in MSB-treated mycelial samples	AtfB-dependent in MSB-treated mycelial samples	AtfA-dependent in untreated conidial samples	AtfB-dependent in untreated conidial samples	AtfA-dependent in MSB-treated conidial samples	AtfB-dependent in MSB-treated conidial samples
AN0609	sidI	Triacetylfusarinine C (TAFC) biosynthetic enoyl-CoA hydratase; siderophore biosynthetic enzyme	AN0607 (sidC) cluster
AN0608		Ortholog(s) have role in N',N'',N'''-triacetylfusarinine C biosynthetic process, ergosterol biosynthetic process, siderophore biosynthetic process and peroxisome localization	AN0607 (sidC) cluster
AN0607	sidC	Non-ribosomal peptide synthetase; similar to ferrichrome peptide synthetases; involved in ferricrocin (FC) siderophore biosynthesis	AN0607 (sidC) cluster	NRPS
				Number of AtfA or AtfB dependent cluster genes:	0	0	0	0	0	0	0	0
				Number of genes in the cluster:	3	3	3	3	3	3	3	3
				Nmber of AtfA or AtfB depenent genes:	329	96	240	9	1496	439	1143	155
				Totel number of genes:	10775	10775	10775	10775	10775	10775	10775	10775
				p-value (Fisher's exact test):	1	1	1	1	1	1	1	1
GENE ID	Gene name	Description (AspGD)	Cluster	Key gene	AtfA-dependent in untreated mycelial samples	AtfB-dependent in untreated mycelial samples	AtfA-dependent in MSB-treated mycelial samples	AtfB-dependent in MSB-treated mycelial samples	AtfA-dependent in untreated conidial samples	AtfB-dependent in untreated conidial samples	AtfA-dependent in MSB-treated conidial samples	AtfB-dependent in MSB-treated conidial samples
AN0533		Putative transcription factor; predicted role in secondary metabolite production	pkdA cluster	TF
AN0532		Predicted DDE1 transposon-related ORF	pkdA cluster						AA		AA
AN0531		Protein of unknown function	pkdA cluster
AN0530		Has domain(s) with predicted FAD binding, oxidoreductase activity and role in metabolic process	pkdA cluster
AN0529		Ortholog of A. nidulans FGSC A4 : AN7899/dbaE, AN9159, AN2031, AN1032/afoC, A. fumigatus Af293 : Afu8g00910 and A. niger CBS 513.88 : An03g01180, An09g01790, An03g01810	pkdA cluster
AN0528		Has domain(s) with predicted role in transmembrane transport and integral component of membrane localization	pkdA cluster
AN0527		Ortholog of A. oryzae RIB40 : AO090001000396 and Aspergillus flavus NRRL 3357 : AFL2T_09050	pkdA cluster
AN0526		Has domain(s) with predicted 2-oxoglutarate-dependent dioxygenase activity, iron ion binding, oxidoreductase activity and role in oxidation-reduction process	pkdA cluster
AN0525		Has domain(s) with predicted oxidoreductase activity	pkdA cluster		A/B	A/B
AN0524		Ortholog of A. niger CBS 513.88 : An16g06480, Aspergillus brasiliensis : Aspbr1_0048090, Aspergillus flavus NRRL 3357 : AFL2T_09053 and Aspergillus versicolor : Aspve1_0042193	pkdA cluster
AN0523	pkdA	Putative polyketide synthase; involved in secondary metabolite production	pkdA cluster	PKS
				Number of AtfA or AtfB dependent cluster genes:	1	1	0	0	1	0	1	0
				Number of genes in the cluster:	11	11	11	11	11	11	11	11
				Nmber of AtfA or AtfB depenent genes:	329	96	240	9	1496	439	1143	155
				Totel number of genes:	10775	10775	10775	10775	10775	10775	10775	10775
				p-value (Fisher's exact test):	0.2891	0.0938	1	1	0.807	1	0.7089	1
GENE ID	Gene name	Description (AspGD)	Cluster	Key gene	AtfA-dependent in untreated mycelial samples	AtfB-dependent in untreated mycelial samples	AtfA-dependent in MSB-treated mycelial samples	AtfB-dependent in MSB-treated mycelial samples	AtfA-dependent in untreated conidial samples	AtfB-dependent in untreated conidial samples	AtfA-dependent in MSB-treated conidial samples	AtfB-dependent in MSB-treated conidial samples
AN10023	mdpL	Member of the monodictyphenone (mdp) secondary metabolite biosynthesis gene cluster; required for monodictyphenone biosynthesis	Monodictyphenone (mdp) cluster
AN10044	mdpK	Putative oxidoreductase; member of the monodictyphenone (mdp) secondary metabolite biosynthesis gene cluster; required for monodictyphenone biosynthesis	Monodictyphenone (mdp) cluster
AN10038	mdpJ	Putative glutathione S transferase; member of the monodictyphenone (mdp) secondary metabolite biosynthesis gene cluster; required for monodictyphenone biosynthesis	Monodictyphenone (mdp) cluster
AN10035	mdpI	Putative AMP-binding CoA ligase; member of the monodictyphenone (mdp) secondary metabolite biosynthesis gene cluster	Monodictyphenone (mdp) cluster
AN10022	mdpH	Protein with homology to the DUF 1772 superfamily; member of the monodictyphenone (mdp)secondary metabolite biosynthesis gene cluster	Monodictyphenone (mdp) cluster
AN0150	mdpG	Polyketide synthase; member of the monodictyphenone secondary metabolite biosynthesis gene cluster; required for the synthesis of the xanthones (shamixanthone and epishamixanthone), emodin, arugosins, monodictyphenone, and related compounds	Monodictyphenone (mdp) cluster	PKS
AN0149	mdpF	Putative zinc-dependent hydrolase; member of the monodictyphenone (mdp) secondary metabolite biosynthesis gene cluster	Monodictyphenone (mdp) cluster
AN0148	mdpE	C6 zinc finger transcription factor similar to AflR; member of the monodictyphenone secondary metabolite biosynthesis gene cluster; required for synthesis of monodictyphenone and related compounds but not prenyl xanthones	Monodictyphenone (mdp) cluster	TF
AN0147	mdpD	Flavin-containing monooxygenase; member of the monodictyphenone secondary metabolite biosynthesis gene cluster; responsible for conversion of monodictyphenone to the prenyl xanthones, shamixanthone and epishamixanthone	Monodictyphenone (mdp) cluster
AN0146	mdpC	Protein with homology to versicolorin ketoreductase; member of the (mdp) monodictyphenone secondary metabolite biosynthesis gene cluster; required for monodictyphenone biosynthesis	Monodictyphenone (mdp) cluster
AN10049	mdpB	Protein with homology to scytalone dehydratase; member of the monodictyphenone (mdp) secondary metabolite biosynthesis gene cluster; transcript is induced by nitrate	Monodictyphenone (mdp) cluster
AN10021	mdpA	Regulatory protein; member of the monodictyphenone secondary metabolite biosynthesis gene cluster; similar to aflatoxin coactivator aflJ and O-methyltransferases; required for biosynthesis of monodictyphenone, a prenyl xanthone precursor	Monodictyphenone (mdp) cluster	Transcription coactivator							AA
				Number of AtfA or AtfB dependent cluster genes:	0	0	0	0	0	0	1	0
				Number of genes in the cluster:	12	12	12	12	12	12	12	12
				Nmber of AtfA or AtfB depenent genes:	329	96	240	9	1496	439	1143	155
				Totel number of genes:	10775	10775	10775	10775	10775	10775	10775	10775
				p-value (Fisher's exact test):	1	1	1	1	1	1	0.7398	1
GENE ID	Gene name	Description (AspGD)	Cluster	Key gene	AtfA-dependent in untreated mycelial samples	AtfB-dependent in untreated mycelial samples	AtfA-dependent in MSB-treated mycelial samples	AtfB-dependent in MSB-treated mycelial samples	AtfA-dependent in untreated conidial samples	AtfB-dependent in untreated conidial samples	AtfA-dependent in MSB-treated conidial samples	AtfB-dependent in MSB-treated conidial samples
AN0044		Ortholog(s) have ubiquitin protein ligase activity, role in DNA repair, nucleotide-excision repair, postreplication repair, protein ubiquitination and site of double-strand break localization	No PKS/NRPS backbone 4
AN0043		Has domain(s) with predicted transferase activity and role in biosynthetic process	No PKS/NRPS backbone 4								AA
AN0042		Has domain(s) with predicted metal ion transmembrane transporter activity, role in metal ion transport, transmembrane transport and membrane localization	No PKS/NRPS backbone 4
				Number of AtfA or AtfB dependent cluster genes:	0	0	0	0	0	0	1	0
				Number of genes in the cluster:	3	3	3	3	3	3	3	3
				Nmber of AtfA or AtfB depenent genes:	329	96	240	9	1496	439	1143	155
				Totel number of genes:	10775	10775	10775	10775	10775	10775	10775	10775
				p-value (Fisher's exact test):	1	1	1	1	1	1	0.2857	1
GENE ID	Gene name	Description (AspGD)	Cluster	Key gene	AtfA-dependent in untreated mycelial samples	AtfB-dependent in untreated mycelial samples	AtfA-dependent in MSB-treated mycelial samples	AtfB-dependent in MSB-treated mycelial samples	AtfA-dependent in untreated conidial samples	AtfB-dependent in untreated conidial samples	AtfA-dependent in MSB-treated conidial samples	AtfB-dependent in MSB-treated conidial samples
AN0029		Has domain(s) with predicted role in transmembrane transport and integral component of membrane localization	AN0016 cluster
AN0028		Has domain(s) with predicted hydrolase activity	AN0016 cluster
AN0027		Ortholog of A. nidulans FGSC A4 : AN12088, A. fumigatus Af293 : Afu2g09400, A. niger CBS 513.88 : An12g05000 and A. oryzae RIB40 : AO090011000294, AO090026000051, AO090011000747, AO090011000330	AN0016 cluster
AN0026		Has domain(s) with predicted DNA binding, DNA-binding transcription factor activity, RNA polymerase II-specific, zinc ion binding activity and role in regulation of transcription, DNA-templated, transcription, DNA-templated	AN0016 cluster	TF
AN0025		Ortholog of A. nidulans FGSC A4 : AN5400, AN9282, AN7063, AN7804/stcW, AN8757, A. fumigatus Af293 : Afu6g03020, Afu6g13790 and A. niger CBS 513.88 : An08g09190, An03g06480, An11g08030, An13g01810, An12g07380	AN0016 cluster
AN0024		Has domain(s) with predicted oxidoreductase activity, zinc ion binding activity and role in oxidation-reduction process	AN0016 cluster
AN10005		Has domain(s) with predicted oxidoreductase activity and role in metabolic process	AN0016 cluster
AN0023		Has domain(s) with predicted oxidoreductase activity and role in metabolic process	AN0016 cluster
AN0022	aglA	Putative alpha-1,4-galactosidase	AN0016 cluster
AN0021		Ortholog of A. fumigatus Af293 : Afu3g00630, A. niger CBS 513.88 : An01g07950, An14g07300, An01g11330, An06g02140 and A. oryzae RIB40 : AO090010000178, AO090026000311, AO090003000892	AN0016 cluster
AN0020		Ortholog of A. fumigatus Af293 : Afu2g00190, A. niger CBS 513.88 : An15g07480, Aspergillus versicolor : Aspve1_0365574, Aspergillus niger ATCC 1015 : 40853-mRNA and Aspergillus zonatus : Aspzo1_0077270	AN0016 cluster						A-B	A-B	A-B	A-B
AN0019		Protein of unknown function	AN0016 cluster
AN0018		Possible pseudogene	AN0016 cluster						AA		AA
AN0017		Has domain(s) with predicted copper ion binding activity and role in copper ion homeostasis	AN0016 cluster
AN0016		Putative nonribosomal peptide synthase	AN0016 cluster	NRPS
AN0015		Has domain(s) with predicted ATP binding, ATPase activity, ATPase-coupled transmembrane transporter activity, nucleoside-triphosphatase activity, nucleotide binding activity and role in transmembrane transport	AN0016 cluster						A-B	A-B	A/B	A/B
				Number of AtfA or AtfB dependent cluster genes:	0	0	0	0	3	2	3	2
				Number of genes in the cluster:	16	16	16	16	16	16	16	16
				Nmber of AtfA or AtfB depenent genes:	329	96	240	9	1496	439	1143	155
				Totel number of genes:	10775	10775	10775	10775	10775	10775	10775	10775
				p-value (Fisher's exact test):	1	1	1	1	0.3872	0.1366	0.237	0.02162

## Sheet: Carbohydrate metabolism
Table S6 Characterization of AtfA- and AtfB-dependent genes by their known or putative functions.
Sheet 2 - Selected carbohydrate metabolism gene groups
a - According to Aspergillus Genome Database (http://www.aspgd.org/).
b - According to the reference(s) mentioned at the definition of the appropriate gene group in the Materials and methods chapter of the manuscript.
GENE ID	Gene namea	Description (AspGD)a	Groupb	Descriptionb	AtfA-dependent in untreated mycelial samples	AtfB-dependent in untreated mycelial samples	AtfA-dependent in MSB-treated mycelial samples	AtfB-dependent in MSB-treated mycelial samples	AtfA-dependent in untreated conidial samples	AtfB-dependent in untreated conidial samples	AtfA-dependent in MSB-treated conidial samples	AtfB-dependent in MSB-treated conidial samples
AN8689	glkA	Putative glucokinase; ORF that was absent from the original release of version 4 of the A. nidulans annotation, but present in a previous version; reinstated into version 4 in AspGD as of July 2009	Glycolysis	Glucokinase					AA		AA
AN7459	hxkA	Putative hexokinase with a predicted role in carbohydrate metabolism	Glycolysis	Hexokinase
AN2638	hxkB	Putative hexokinase with a predicted role in carbohydrate metabolism	Glycolysis	Hexokinase					A-B	A-B	A-B	A-B
AN6037	swoM	Putative glucose-6-phosphate isomerase with a predicted role in gluconeogenesis and glycolysis; mutant defective in hyphal polarity and conidiation	Glycolysis	Glucose-6-phosphate isomerase
AN3223	pfkA	Putative 6-phosphofructokinase with a predicted role in gluconeogenesis and glycolysis; upregulated under hypoxic growth conditions	Glycolysis	6-Phosphofructokinase					AA		AA
AN2875	fbaA	Putative fructose-bisphosphate aldolase with a predicted role in gluconeogenesis and glycolysis; intracellular, menadione stress-induced protein; palA-dependent expression independent of pH	Glycolysis	Fructose-bisphosphate aldolase					AA		AA
AN6900	tpiA	Putative triose-phosphate isomerase with a predicted role in gluconeogenesis and glycolysis; protein induced by farnesol	Glycolysis	Triose-phosphate isomerase					AA		AA
AN5908	tpiB	Putative triose-phosphate isomerase with a predicted role in glycolysis	Glycolysis	Triose-phosphate isomerase
AN8041	gpdA	Glyceraldehyde-3-phosphate dehydrogenase with a predicted role in gluconeogenesis and glycolysis; the gpdA promoter is a commonly used regulatory sequence for driving constitutive heterologous gene expression	Glycolysis	Glyceraldehyde-3-phosphate dehydrogenase					AA		AA
AN2583	gpdC	Putative glyceraldehyde-3-phosphate dehydrogenase with a predicted role in gluconeogenesis and glycolysis	Glycolysis	Glyceraldehyde-3-phosphate dehydrogenase					AB	AB
AN1246	pgkA	Putative phosphoglycerate kinase with a predicted role in gluconeogenesis and glycolysis; intracellular, menadione stress-induced protein; promoter activity is greater on gluconeogenic than on glycolytic carbon sources	Glycolysis	Phosphoglycerate kinase					AA		AA
AN3059	pgmA	Putative phosphoglycerate mutase with a predicted role in gluconeogenesis and glycolysis; expression upregulated after exposure to farnesol	Glycolysis	Phosphoglycerate mutase					AA		AA
AN5746	acuN	Putative phosphopyruvate hydratase with a predicted role in gluconeogenesis and glycolysis; intracellular; protein abundance decreased by menadione stress; protein induced by farnesol	Glycolysis	Phosphopyruvate hydratase
AN5210	pkiA	Putative pyruvate kinase with a predicted role in gluconeogenesis and glycolysis; intracellular, menadione stress-induced protein	Glycolysis	Pyruvate kinase
AN10844	fbpZ	Putative fructose-2,6-bisphosphate 2-phosphatase	Glycolysis	Fructose-2,6-bisphosphate 2-phosphatase
AN5144	pfkZ	Putative 6-phosphofructo-2-kinase with a predicted role in mannose/mannitol, fructose, and sorbose/sorbitol metabolism	Glycolysis	6-Phosphofructo 2-kinase					AA		AA
				Number of AtfA or AtfB dependent genes in the group:	0	0	0	0	10	2	9	1
				Number of genes in the group:	16	16	16	16	16	16	16	16
				Number of AtfA or AtfB depenent genes:	329	96	240	9	1496	439	1143	155
				Totel number of genes:	10775	10775	10775	10775	10775	10775	10775	10775
				p-value (Fisher's exact test):	1	1	1	1	9.312e-06	0.1366	9.441e-06	0.2071
GENE ID	Gene name	Description (AspGD)	Group	Description	AtfA-dependent in untreated mycelial samples	AtfB-dependent in untreated mycelial samples	AtfA-dependent in MSB-treated mycelial samples	AtfB-dependent in MSB-treated mycelial samples	AtfA-dependent in untreated conidial samples	AtfB-dependent in untreated conidial samples	AtfA-dependent in MSB-treated conidial samples	AtfB-dependent in MSB-treated conidial samples
AN2981	gsdA	Putative glucose 6-phosphate 1-dehydrogenase with a predicted role in the pentose-phosphate shunt; intracellular, menadione stress-induced protein; transcript downregulated by growth in ethanol	Pentose-phosphate shunt	Glucose-6-phosphate 1-dehydrogenase
AN0285		Putative 6-phosphogluconolactonase with a predicted role in gluconic acid and gluconate metabolism; expression upregulated after exposure to farnesol	Pentose-phosphate shunt	6-Phosphoglucono lactonase					AA		AA
AN3954		Putative phosphogluconate dehydrogenase (decarboxylating) with a predicted role in the pentose-phosphate shunt	Pentose-phosphate shunt	Phosphogluconate dehydrogenase					AA		AA
AN4913	phk	Putative phosphoketolase with a predicted role in the phosphoketolase pathway	Pentose-phosphate shunt	Transketolase	AA				AA		AA
AN0688		Putative transketolase with a predicted role in the pentose-phosphate shunt or xylulose metabolism	Pentose-phosphate shunt	Transketolase
AN8935		Putative transferase with a predicted role in the pentose-phosphate shunt or xylulose metabolism	Pentose-phosphate shunt	Formaldehyde transketolase
AN8551		Putative transferase with a predicted role in the pentose-phosphate shunt or xylulose metabolism	Pentose-phosphate shunt	Formaldehyde transketolase
AN9180		Putative transketolase; intracellular; protein abundance decreased by menadione stress	Pentose-phosphate shunt	Formaldehyde transketolase	AA		AA		AA		AA
AN0240	pppA	Putative transaldolase with a predicted role in the pentose-phosphate shunt; intracellular, menadione stress-induced protein; protein induced by farnesol	Pentose-phosphate shunt	Transaldolase					AA		AA
AN9443		Has domain(s) with predicted catalytic activity and role in carbohydrate metabolic process	Pentose-phosphate shunt	Transaldolase
AN6113		Has domain(s) with predicted catalytic activity and role in carbohydrate metabolic process	Pentose-phosphate shunt	Transaldolase
AN8792		Has domain(s) with predicted catalytic activity and role in carbohydrate metabolic process	Pentose-phosphate shunt	Transaldolase					AA		AA
				Number of AtfA or AtfB dependent genes in the group:	2	0	1	0	6	0	6	0
				Number of genes in the group:	12	12	12	12	12	12	12	12
				Number of AtfA or AtfB depenent genes:	329	96	240	9	1496	439	1143	155
				Totel number of genes:	10775	10775	10775	10775	10775	10775	10775	10775
				p-value (Fisher's exact test):	0.05013	1	0.237	1	0.003094	1	0.0007387	1
GENE ID	Gene name	Description (AspGD)	Group	Description	AtfA-dependent in untreated mycelial samples	AtfB-dependent in untreated mycelial samples	AtfA-dependent in MSB-treated mycelial samples	AtfB-dependent in MSB-treated mycelial samples	AtfA-dependent in untreated conidial samples	AtfB-dependent in untreated conidial samples	AtfA-dependent in MSB-treated conidial samples	AtfB-dependent in MSB-treated conidial samples
AN8552	ladC	Putative L-arabinitol 4-dehydrogenase with a predicted role in L-arabinose/arabitol and D-xylose/D,L-xylulose/xylitol metabolism	Ribose metabolism	L-Arabinitol 4-dehydrogenase
AN3312		Putative L-xylulose reductase	Ribose metabolism	L-Xylulose reductase
AN8113		Putative oxidoreductase with a predicted role in carbohydrate metabolism	Ribose metabolism	L-Xylulose reductase
AN8819		Putative dehydrogenase with a predicted role in carbohydrate metabolism	Ribose metabolism	L-Xylulose reductase
AN5547		Has domain(s) with predicted oxidoreductase activity and role in metabolic process	Ribose metabolism	Mannitol 2-dehydrogenase
AN7590		Putative reductase with a predicted role in carbohydrate metabolism; mannitol 2-dehydrogenase; intracellular, menadione stress-induced protein; HapX-regulated; protein induced by farnesol	Ribose metabolism	Mannitol 2-dehydrogenase	AA				AA		AA
AN11941		Putative L-iditol 2-dehydrogenase with a predicted role in mannose/mannitol, fructose, and sorbose/sorbitol metabolism	Ribose metabolism	D-Xylulose reductase
AN8790	xkiA	Putative D-xylulokinase with a predicted role in xylulose metabolism; transcriptionally induced by growth on xylose	Ribose metabolism	Xylulokinase
AN11085		Putative D-arabinitol 4-dehydrogenaset	Ribose metabolism	D-Arabinitol 4-dehydrogenase
AN11096		Putative ribitol 2-dehydrogenase; palA-dependent expression independent of pH	Ribose metabolism	Ribitol 2-dehydrogenase					A/B	A/B
AN6985		Putative ribulokinase with a predicted role in ribulose metabolism	Ribose metabolism	D-Ribulokinase
AN1568		Putative ribulokinase with a predicted role in ribulose metabolism	Ribose metabolism	D-Ribulokinase
AN7588		Putative ribulose-phosphate 3-epimerase with a predicted role in the pentose-phosphate shunt	Ribose metabolism	Ribulose-phosphate 3-epimerase					AA		AA
AN2440		Putative ribose-5-phosphate isomerase with a predicted role in the pentose-phosphate shunt	Ribose metabolism	Ribose-5-phosphate isomerase
AN5907		Putative ribose-5-phosphate isomerase; intracellular, menadione stress-induced protein	Ribose metabolism	Ribose-5-phosphate isomerase
				Number of AtfA or AtfB dependent genes in the group:	1	0	0	0	3	1	2	0
				Number of genes in the group:	15	15	15	15	15	15	15	15
				Number of AtfA or AtfB depenent genes:	329	96	240	9	1496	439	1143	155
				Totel number of genes:	10775	10775	10775	10775	10775	10775	10775	10775
				p-value (Fisher's exact test):	0.3721	1	1	1	0.3469	0.4644	0.4831	1
GENE ID	Gene name	Description (AspGD)	Group	Description	AtfA-dependent in untreated mycelial samples	AtfB-dependent in untreated mycelial samples	AtfA-dependent in MSB-treated mycelial samples	AtfB-dependent in MSB-treated mycelial samples	AtfA-dependent in untreated conidial samples	AtfB-dependent in untreated conidial samples	AtfA-dependent in MSB-treated conidial samples	AtfB-dependent in MSB-treated conidial samples
AN0756	lacA	Beta-galactosidase with a predicted role in lactose metabolism	Lactose metabolism 1	beta-galactosidase
AN0980	lacB	Beta-galactosidase with a predicted role in lactose metabolism	Lactose metabolism 1	beta-galactosidase
AN2463	lacF	Putative beta-galactosidase with a predicted role in lactose metabolism	Lactose metabolism 1	beta-galactosidase					AA		AA
AN3201	lacD	Putative beta-galactosidase with a predicted role in lactose metabolism	Lactose metabolism 1	beta-galactosidase
AN6388	lacE	Putative beta-galactosidase with a predicted role in polysaccharide degradation	Lactose metabolism 1	beta-galactosidase
AN0194	lacC	Putative beta-galactosidase	Lactose metabolism 1	beta-galactosidase
AN2804		Putative beta-galactosidase; transcript repressed by nitrate	Lactose metabolism 1	beta-galactosidase
AN1107		Protein of unknown function	Lactose metabolism 1	beta-galactosidase
AN3199	lacpA	MFS sugar transporter; induced by lactose and galactose	Lactose metabolism 1	lactose permease					AA		AA
AN2814	lacpB	Ortholog(s) have role in cellobiose transport, ethanol biosynthetic process	Lactose metabolism 1	lactose permease
AN1577	lacpC	Has domain(s) with predicted transmembrane transporter activity, role in transmembrane transport and integral component of membrane, membrane localization	Lactose metabolism 1	lactose permease					AA		AA
				Number of AtfA or AtfB dependent genes in the group:	0	0	0	0	3	0	3	0
				Number of genes in the group:	11	11	11	11	11	11	11	11
				Number of AtfA or AtfB depenent genes:	329	96	240	9	1496	439	1143	155
				Totel number of genes:	10775	10775	10775	10775	10775	10775	10775	10775
				p-value (Fisher's exact test):	1	1	1	1	0.188	1	0.1028	1
GENE ID	Gene name	Description (AspGD)	Group	Description	AtfA-dependent in untreated mycelial samples	AtfB-dependent in untreated mycelial samples	AtfA-dependent in MSB-treated mycelial samples	AtfB-dependent in MSB-treated mycelial samples	AtfA-dependent in untreated conidial samples	AtfB-dependent in untreated conidial samples	AtfA-dependent in MSB-treated conidial samples	AtfB-dependent in MSB-treated conidial samples
AN4957	galE	Putative galactokinase with a predicted role in galactose and galactitol metabolism	Lactose metabolism 2	Leloir pathway
AN6182	galD	Putative hexose-1-phosphate uridylyltransferase with a predicted role in galactose and galactitol metabolism; expression upregulated after exposure to farnesol	Lactose metabolism 2	Leloir pathway					AA
AN9148	galF	Putative UTP-glucose-1-phosphate uridylyltransferase with a predicted role in galactose and galactitol metabolism; protein expressed at decreased levels in a hapX mutant versus wild-type	Lactose metabolism 2	Leloir pathway					AA		AA
AN4727	ugeA	UDP-glucose 4-epimerase, involved in galactose metabolism; converts UDP-galactose to UDP-glucose; intracellular; protein abundance decreased by menadione stress	Lactose metabolism 2	Leloir pathway
AN2867	pgmB	Putative phosphoglucomutase with a predicted role in carbohydrate metabolism; intracellular; protein abundance decreased by menadione stress; transcript levels increase during asexual development	Lactose metabolism 2	Leloir pathway					AA		AA
				Number of AtfA or AtfB dependent genes in the group:	0	0	0	0	3	0	3	0
				Number of genes in the group:	5	5	5	5	5	5	5	5
				Number of AtfA or AtfB depenent genes:	329	96	240	9	1496	439	1143	155
				Totel number of genes:	10775	10775	10775	10775	10775	10775	10775	10775
				p-value (Fisher's exact test):	1	1	1	1	0.02147	1	0.0101	1
GENE ID	Gene name	Description (AspGD)	Group	Description	AtfA-dependent in untreated mycelial samples	AtfB-dependent in untreated mycelial samples	AtfA-dependent in MSB-treated mycelial samples	AtfB-dependent in MSB-treated mycelial samples	AtfA-dependent in untreated conidial samples	AtfB-dependent in untreated conidial samples	AtfA-dependent in MSB-treated conidial samples	AtfB-dependent in MSB-treated conidial samples
AN7459	hxkA	Putative hexokinase with a predicted role in carbohydrate metabolism	Lactose metabolism 3	D-galactose oxidoreductive pathway
AN0423	xyrA	Putative D-xylose reductase with a predicted role in carbohydrate metabolism; transcriptionally induced by growth on xylose	Lactose metabolism 3	D-galactose oxidoreductive pathway
AN0942	ladA	Putative L-arabinitol 4-dehydrogenase with a predicted role in L-arabinose/arabitol and D-xylose/D,L-xylulose/xylitol metabolism; transcriptionally induced by growth on xylose	Lactose metabolism 3	D-galactose oxidoreductive pathway
AN10169	lxrA	Short-chain dehydrogenase; transcriptionally induced by growth on xylose	Lactose metabolism 3	D-galactose oxidoreductive pathway
AN9064	xdhA	Xylitol dehydrogenase with a predicted role in amino acid or carbohydrate metabolism; putative D-xylulose reductase; transcriptionally induced by growth on xylose	Lactose metabolism 3	D-galactose oxidoreductive pathway
				Number of AtfA or AtfB dependent genes in the group:	0	0	0	0	0	0	0	0
				Number of genes in the group:	5	5	5	5	5	5	5	5
				Number of AtfA or AtfB depenent genes:	329	96	240	9	1496	439	1143	155
				Totel number of genes:	10775	10775	10775	10775	10775	10775	10775	10775
				p-value (Fisher's exact test):	1	1	1	1	1	1	1	1
GENE ID	Gene name	Description (AspGD)	Group	Description	AtfA-dependent in untreated mycelial samples	AtfB-dependent in untreated mycelial samples	AtfA-dependent in MSB-treated mycelial samples	AtfB-dependent in MSB-treated mycelial samples	AtfA-dependent in untreated conidial samples	AtfB-dependent in untreated conidial samples	AtfA-dependent in MSB-treated conidial samples	AtfB-dependent in MSB-treated conidial samples
AN2541	abfA	Putative alpha-L-arabinofuranosidase with a predicted role in arabinose polymer metabolism; the feature AN9520 has been merged into AN2541	CAZyme	AN9520.2 or AN2541.2					AA		AA
AN8007	abnC	Protein with arabinan endo-1,5-alpha-L-arabinosidase activity, involved in degradation of pectin	CAZyme	endo-α-1,5-L-arabinosidase (AN8007.2)			AA
AN6673	afcB	Putative alpha-fucosidase	CAZyme	AN6673.2					AB	AB
AN8953	agdB	Putative alpha-glucosidase with a predicted role in maltose metabolism; transcriptionally induced by isomaltose; induced by rapamycin-induced autophagy	CAZyme	α-glucosidase (AgdB;AN8953.2)	AA		AA			BB
AN10420	agdF	Putative alpha-glucosidase with a predicted role in starch metabolism; transcriptionally induced by isomaltose in an amyR-dependent manner	CAZyme	AN10420.3 (AgdF)	AA
AN4843	agdG	Putative alpha-glucosidase with a predicted role in maltose metabolism	CAZyme	AN4843.2 (AgdG)	AA
AN7624	aglB	Putative alpha-galactosidase with a predicted role in galactose and galactitol metabolism and in degradation of mannans	CAZyme	AN7624.2	AA
AN8138	aglC	Alpha-galactosidase, involved in degradation of mannans; predicted role in galactose and galactitol metabolism; glycoside hydrolase family 36 (GH36); transcriptionally induced by growth on xylose	CAZyme	α-galactosidase (AglC;AN8138.2)	A-B	A-B	AA		A-B	A-B	AA
AN9035	aglG	Putative alpha-galactosidase with a predicted role in galactose and galactitol metabolism and in degradation of mannans	CAZyme	AN9035.2					AA		A-B	A-B
AN3790	agnB	Putative alpha-1,3-glucanase	CAZyme	AN3790.2					AB	AB
AN9042	agnC	Putative alpha-1,3-glucanase	CAZyme	AN9042.2					AB	AB
AN1604	agnE	Putative alpha-1,3-glucanase; predicted glycosyl phosphatidylinositol (GPI)-anchor	CAZyme	AN1604.2			AA		AA
AN5885	agsA	Catalytic subunit of alpha-1,3 glucan synthase complex; plays a minor role in alpha-1,3 glucan synthesis compared to AgsB; locus contains the conserved upstream open reading frame (uORF) AN5885-uORF	CAZyme	α-1,3-glucan synthase (AgsA;AN5885;ANID5885)			AA
AN3307	agsB	Catalytic subunit of the major alpha-1,3 glucan synthase complex; mutants grow as dispersed hyphae in liquid culture	CAZyme	α-1,3-glucan synthase (AgsB;AN3307;ANID3307)			AA		A-B	A-B
AN3402	amyB	Putative alpha-amylase with a predicted role in starch metabolism; transcriptionally induced by isomaltose in an amyR-dependent manner	CAZyme	α-amylase (AmyB;AN3402.2)						BB
AN3308	amyD	Putative alpha-amylase with a predicted role in starch metabolism; predicted glycosyl phosphatidylinositol (GPI)-anchor	CAZyme	AN3308.2 (AmyD)					AA		AA
AN3388	amyF	Putative alpha-amylase with a predicted role in starch metabolism; transcriptionally induced by isomaltose in an amyR-dependent manner	CAZyme	AN3388.2 (AmyF)	A/B	A/B
AN7915	bglD	Putative glucosidase; member of the F9775 secondary metabolite gene cluster	CAZyme	AN7915.2					AB	AB
AN6652	bglE	Putative beta-glucosidase	CAZyme	AN6652 (Anid-Bgl101)							AA
AN2612	bglK	Putative beta-glucosidase with a predicted role in degradation of glucans	CAZyme	AN2612.2					AA		AA
AN9183	bglR	Putative beta-glucosidase with a predicted role in polysaccharide degradation	CAZyme	AN9183.2	A/B	A/B
AN6445	cicC	Putative aryl-alcohol oxidase-related protein; coregulated with the NRPS/AN6444; encoded within the cichorine gene cluster	CAZyme	AN6445.2					AA
AN2463	lacF	Putative beta-galactosidase with a predicted role in lactose metabolism	CAZyme	AN2463					AA		AA
AN3566	mns1C	Putative alpha-mannosidase with a predicted role in mannose polymer metabolism	CAZyme	AN3566.2					AA		AA
AN0741	pelA	Pectate lyase involved in degradation of pectin; regulated by the carbon catabolite repression system	CAZyme	pectate lyase (PelA;AN0741.2)					AA		AA
AN8327	pgaC	Protein with polygalacturonase activity, involved in degradation of pectin	CAZyme	endo-polygalacturonase (AN8327.2)			AA
AN8761	pgxA	Protein with polygalacturonase activity, involved in degradation of pectin	CAZyme	exo-polygalacturonase (AN8761.2)					AA		AA
AN3229	pkfF	Putative aryl-alcohol oxidase-related protein; choline dehydrogenase; aspernidine A secondary metabolism gene cluster member	CAZyme	AN3229.2					AA		AA
AN5333	plyC	Putative pectate lyase, involved in degradation of pectin	CAZyme	AN5333.2			AA		AA		AA
AN6395	rglB	Protein with rhamnogalacturonan lyase activity, involved in degradation of pectin	CAZyme	rhamnogalacturonan lyase (AN6395.2)					AA		AA
AN5523	tpsA	Putative alpha,alpha-trehalose-phosphate synthase (UDP-forming) with a role in trehalose biosynthesis; transcriptionally induced during spore germination and exponential growth; required for viability of conidia during prolonged storage	CAZyme	α,α-trehalose-phosphate synthase (TpsA;AN5523.2)					A-B	A-B	AA
AN5635	treB	Putative alpha, alpha-trehalase with a predicted role in trehalose hydrolysis	CAZyme	α,α-trehalase (TreB;AN5635.2)					AA		AA
AN1542	xgcA	Protein with oligoxyloglucan reducing end-specific cellobiohydrolase activity, involved in degradation of xyloglucans	CAZyme	oligoxyloglucan reducing end-specific xyloglucanobiohydrolase (OREX;AN1542.2)					AA		AA
AN5061	xgeB	Putative xyloglucanase	CAZyme	AN5061.2					AA		AA
AN9365	xlnB	Protein with endo-1,4-beta-xylanase activity, involved in degradation of xylans	CAZyme	xylanase 2 (XlnB;X24;AN9365.2)					AA
AN2359	xlnD	Beta-xylosidase, involved in degradation of xylans; transcriptionally induced by growth on xylose	CAZyme	β-xylosidase (BxlA;XlnD;AN2359.2)					AB	AB
AN0245			CAZyme	AN0245.2
AN0472			CAZyme	AN0472.2
AN0779			CAZyme	AN0779.2
AN11143			CAZyme	AN11143.3 (GlaA)
AN1197		Has domain(s) with predicted carbohydrate binding, catalytic activity and role in carbohydrate metabolic process	CAZyme	AN1197.2							AB	AB
AN1257		Has domain(s) with predicted transferase activity, transferring glycosyl groups activity	CAZyme	AN1257.2					AA		AA
AN1620			CAZyme	AN1620.2
AN2303			CAZyme	AN2303.2
AN2325			CAZyme	AN2325.2
AN2356			CAZyme	AN2356.2
AN2395			CAZyme	AN2395.2
AN3950			CAZyme	AN3950.2
AN4052			CAZyme	AN4052 (Anid-Bgl501)
AN4504			CAZyme	AN4504.2 (fragment)
AN4825			CAZyme	AN4825.2
AN6656			CAZyme	AN6656.2
AN7613		Putative chitinase; glycoside hydrolase family 18 (GH18) protein with a predicted role in chitin hydrolysis	CAZyme	AN7613 (ChiC2-1)					A/B	A/B
AN8986			CAZyme	AN8986.2
AN9327			CAZyme	AN9327.2
AN7241		Ortholog of A. oryzae RIB40 : AO090038000118, Aspergillus flavus NRRL 3357 : AFL2T_08942, Aspergillus versicolor : Aspve1_0133568 and Aspergillus sydowii : Aspsy1_0718256	CAZyme	ANIA_07241					AA		AA
AN10488		Has domain(s) with predicted carbohydrate binding, catalytic activity and role in carbohydrate catabolic process	CAZyme	ANIA_10488					AB	AB	AB	AB
AN4871			CAZyme	chitinase B (ChiB;AN4871.2)
AN4372			CAZyme	endo-polygalacturonase (PG1;AN4372.2)
AN5214			CAZyme	endo-β-1,4-glucanase (AN5214.2)
AN7349			CAZyme	α-1,3-glucanase (MutA;AN7349.2)
AN7345			CAZyme	α-glucosidase (AgdC;AN7345.2)
AN0541			CAZyme	AN0541.2
AN1607		Has domain(s) with predicted transferase activity, transferring hexosyl groups activity and role in carbohydrate metabolic process, lipid glycosylation, metabolic process	CAZyme	AN1607.2					AA		AA
AN1969			CAZyme	AN1969.2
AN4573			CAZyme	AN4573.2
AN4686			CAZyme	AN4686.2
AN7735			CAZyme	AN7735.2 (EglD)
AN8367			CAZyme	AN8367.2
AN8368		Ortholog of A. nidulans FGSC A4 : AN2952, A. fumigatus Af293 : Afu3g07900, Afu4g14080, Afu8g00900, A. niger CBS 513.88 : An02g11330, An03g05560 and A. oryzae RIB40 : AO090120000471	CAZyme	AN8368.2	AA
AN8421			CAZyme	AN8421.2
AN8547			CAZyme	AN8547.2
AN3354			CAZyme	AN3354.2 (fragment)
AN5454			CAZyme	AN5454.2
AN3729			CAZyme	1,3-β-glucan synthase (FksA;AN3729.2)
AN3294			CAZyme	acetyl esterase (AN3294.2)
AN0012			CAZyme	AN0012.2
AN0022			CAZyme	AN0022.2 (fragment)
AN0031			CAZyme	AN0031.2
AN0086			CAZyme	AN0086.2
AN0104			CAZyme	AN0104.2 (AlgC)
AN0160			CAZyme	AN0160.2
AN0194			CAZyme	AN0194.2
AN0221			CAZyme	AN0221.2
AN0246		Ortholog of A. fumigatus Af293 : Afu1g05300, A. niger CBS 513.88 : An01g04570, A. oryzae RIB40 : AO090003000826, Aspergillus wentii : Aspwe1_0049630 and Aspergillus sydowii : Aspsy1_0142918	CAZyme	AN0246.2					AA
AN0265			CAZyme	AN0265.2
AN0280			CAZyme	AN0280.2
AN0299			CAZyme	AN0299.2 (fragment)
AN0383			CAZyme	AN0383.2
AN0393			CAZyme	AN0393.2
AN0479			CAZyme	AN0479.2
AN0487			CAZyme	AN0487.2
AN0499			CAZyme	AN0499.2
AN0509			CAZyme	AN0509 (ChiC2-2)
AN0517		Putative chitinase; glycoside hydrolase family 18 (GH18) protein with a predicted role in chitin hydrolysis	CAZyme	AN0517.2							AA
AN0549			CAZyme	AN0549.2
AN0551			CAZyme	AN0551.2
AN0558			CAZyme	AN0558.2
AN0636			CAZyme	AN0636.2
AN0726			CAZyme	AN0726.2
AN0778			CAZyme	AN0778.2
AN0787			CAZyme	AN0787.2
AN0799			CAZyme	AN0799.2
AN0933			CAZyme	AN0933.2
AN1015			CAZyme	AN1015.2
AN10274			CAZyme	AN10274.3
AN10309			CAZyme	AN10309 (AN2462.2)
AN1041			CAZyme	AN1041.2
AN10502			CAZyme	AN10502 / ANIA_10502 (ChiC2-4) (formerly AN3978)
AN10838		Has domain(s) with predicted catalytic activity, chitin binding, chitinase activity, hydrolase activity, hydrolyzing O-glycosyl compounds activity	CAZyme	AN10838 / ANIA_10838 (ChiC2-3) (formerly AN6662)					AA		AA
AN1332			CAZyme	AN1332.2
AN1416			CAZyme	AN1416.2
AN1428			CAZyme	AN1428.2
AN1429			CAZyme	AN1429.2
AN1455			CAZyme	AN1455.2
AN1459			CAZyme	AN1459.2
AN1551			CAZyme	AN1551.2
AN1555			CAZyme	AN1555.2 (chitin synthase E)
AN1811			CAZyme	AN1811.2
AN1852		Putative chitin deacetylase	CAZyme	AN1852.2 (CDA)	AA
AN1870			CAZyme	AN1870.2
AN2010			CAZyme	AN2010.2 (fragment)
AN2015			CAZyme	AN2015.2
AN2045			CAZyme	AN2045.2
AN2314		Putative 1,4-alpha-glucan branching enzyme with a predicted role in starch metabolism	CAZyme	AN2314.2	AA				AA
AN2388			CAZyme	AN2388.2
AN2424			CAZyme	AN2424.2
AN2425		Ortholog of A. fumigatus Af293 : Afu2g13850, A. niger CBS 513.88 : An02g05260, A. oryzae RIB40 : AO090026000188, Aspergillus wentii : Aspwe1_0054675 and Aspergillus sydowii : Aspsy1_0075212	CAZyme	AN2425.2			AA
AN2523			CAZyme	AN2523.2
AN2534			CAZyme	AN2534.2
AN2537			CAZyme	AN2537.2
AN2542			CAZyme	AN2542.2
AN2543			CAZyme	AN2543.2
AN2563			CAZyme	AN2563.2 (fragment)
AN2582			CAZyme	AN2582.2
AN2626			CAZyme	AN2626.2
AN2631			CAZyme	AN2631.2
AN2690			CAZyme	AN2690.2
AN2719			CAZyme	AN2719.2
AN2752			CAZyme	AN2752.2
AN2774			CAZyme	AN2774.2
AN2834		Putative rhamnogalacturonan acetyl esterase; transcript is induced by nitrate	CAZyme	AN2834.2							AA
AN2923		Ortholog of A. nidulans FGSC A4 : AN10601, A. fumigatus Af293 : Afu2g17770, Afu8g00650, A. niger CBS 513.88 : An11g02090, An01g01000 and A. oryzae RIB40 : AO090020000174, AO090103000301	CAZyme	AN2923.2			AA
AN2936			CAZyme	AN2936.2
AN2952			CAZyme	AN2952.2c/ ANIA_02952
AN2953			CAZyme	AN2953.2
AN2955			CAZyme	AN2955.2
AN3013			CAZyme	AN3013.2
AN3044			CAZyme	AN3044.2
AN3049			CAZyme	AN3049.2
AN3053			CAZyme	AN3053.2
AN3054			CAZyme	AN3054.2
AN3200		Putative beta-glucuronidase with a predicted role in polysaccharide degradation; the predicted pseudogene AN10383 and predicted ORF AN3200 occupy overlapping chromosomal locations in version 4 of the A. nidulans annotation	CAZyme	AN3200	AA		AA		AA		AA
AN3206			CAZyme	AN3206.2
AN3309			CAZyme	AN3309.2 (AmyG)
AN3326			CAZyme	AN3326.2
AN3336			CAZyme	AN3336.2
AN3360			CAZyme	AN3360.2
AN3370			CAZyme	AN3370.2 (fragment)
AN3389			CAZyme	AN3389.2
AN3504			CAZyme	AN3504.2
AN3588			CAZyme	AN3588.2
AN3727			CAZyme	AN3727.2
AN3730			CAZyme	AN3730.2
AN3733			CAZyme	AN3733.2
AN3764			CAZyme	AN3764.2
AN3780		Putative alpha-L-rhamnosidase	CAZyme	AN3780.2					AA		AA
AN3837			CAZyme	AN3837.2
AN3874			CAZyme	AN3874.2
AN3883		Putative glucanase with a predicted role beta-glucan hydrolysis	CAZyme	AN3883.2	AA				AA		AA
AN3903			CAZyme	AN3903.2 (fragment)
AN3914			CAZyme	AN3914.2
AN3925			CAZyme	AN3925.2
AN4006			CAZyme	AN4006.2
AN4082			CAZyme	AN4082.2
AN4084			CAZyme	AN4084.2
AN4092			CAZyme	AN4092.2
AN4102			CAZyme	AN4102.2
AN4212			CAZyme	AN4212.2
AN4367			CAZyme	AN4367.3 (ChsF)
AN4390			CAZyme	AN4390.2
AN4395			CAZyme	AN4395.2
AN4507			CAZyme	AN4507.2 (AmyC) (fragment)
AN4515			CAZyme	AN4515.2
AN4566			CAZyme	AN4566.2
AN4601			CAZyme	AN4601.2
AN4623			CAZyme	AN4623.2
AN4716			CAZyme	AN4716.2
AN4738			CAZyme	AN4738.2
AN4761			CAZyme	AN4761.2
AN4852			CAZyme	AN4852.2
AN4860			CAZyme	AN4860.2
AN4864			CAZyme	AN4864.2
AN4882			CAZyme	AN4882.2
AN4947			CAZyme	AN4947.2
AN5021		Ortholog(s) have role in conidium formation, regulation of growth rate	CAZyme	AN5021.2					AA		AA
AN5105			CAZyme	AN5105.2
AN5231		Putative exo-arabinanase	CAZyme	AN5231.2					AA		A-B	A-B
AN5346			CAZyme	AN5346.2
AN5361			CAZyme	AN5361.2
AN5397			CAZyme	AN5397.2
AN5663			CAZyme	AN5663.2
AN5725			CAZyme	AN5725.2
AN5736			CAZyme	AN5736.2 (fragment)
AN5748			CAZyme	AN5748.2
AN5902			CAZyme	AN5902.2
AN5930		Has domain(s) with predicted hydrolase activity	CAZyme	AN5930.2					AA
AN6103			CAZyme	AN6103.2
AN6106			CAZyme	AN6106.2
AN6286		Has domain(s) with predicted mannosyl-oligosaccharide glucosidase activity and role in oligosaccharide metabolic process	CAZyme	AN6286.2			AA		AA		AA
AN6317			CAZyme	AN6317.2 (partial)
AN6318			CAZyme	AN6318.2
AN6324			CAZyme	AN6324.2 (AmyE)
AN6388			CAZyme	AN6388.2
AN6405			CAZyme	AN6405.2
AN6433			CAZyme	AN6433.2
AN6460		Ortholog of A. nidulans FGSC A4 : AN12398, A. oryzae RIB40 : AO090023000067, AO090010000683, Aspergillus wentii : Aspwe1_0075588 and Aspergillus versicolor : Aspve1_0086685	CAZyme	AN6460.2					AA		AA
AN6464			CAZyme	AN6464.2
AN6534			CAZyme	AN6534.2 (SurA)
AN6571		Ortholog(s) have alpha-1,2-mannosyltransferase activity, role in mannan biosynthetic process, protein glycosylation, protein mannosylation and Golgi apparatus localization	CAZyme	AN6571.2 (fragment)					AA		AA
AN6606			CAZyme	AN6606.2 (fragment)
AN6697			CAZyme	AN6697.2
AN6748			CAZyme	AN6748.2
AN6819			CAZyme	AN6819.2
AN6833			CAZyme	AN6833.2 (fragment)
AN6857			CAZyme	AN6857.2
AN6874			CAZyme	AN6874.2
AN6948			CAZyme	AN6948.2
AN6951			CAZyme	AN6951.2
AN7032			CAZyme	AN7032.2 (fragment)
AN7158		Has domain(s) with predicted hydrolase activity, hydrolase activity, acting on ester bonds activity and role in lipid metabolic process	CAZyme	AN7158.2							AA
AN7267		Has domain(s) with predicted flavin adenine dinucleotide binding, oxidoreductase activity, acting on CH-OH group of donors activity and role in oxidation-reduction process	CAZyme	AN7267.2	AA
AN7301			CAZyme	AN7301.2
AN7307			CAZyme	AN7307.2
AN7402			CAZyme	AN7402.2 (GlyB)
AN7483			CAZyme	AN7483.2
AN7511			CAZyme	AN7511.2
AN7534			CAZyme	AN7534.2
AN7535			CAZyme	AN7535.2
AN7562			CAZyme	AN7562.2
AN7638			CAZyme	AN7638.2 (fragment)
AN7639			CAZyme	AN7639.2
AN7657			CAZyme	AN7657.2
AN7672			CAZyme	AN7672.2
AN7715			CAZyme	AN7715.2
AN7794			CAZyme	AN7794.2
AN7832			CAZyme	AN7832.2
AN7865			CAZyme	AN7865.2
AN7869			CAZyme	AN7869.2
AN7871			CAZyme	AN7871.2
AN7886			CAZyme	AN7886.2 (fragment)
AN7950			CAZyme	AN7950.2 (EglC)
AN7966		Putative pectin methyl esterase	CAZyme	AN7966.2 (fragment)					AA		AA
AN7998			CAZyme	AN7998.2
AN8010			CAZyme	AN8010.2
AN8068			CAZyme	AN8068.2
AN8119			CAZyme	AN8119.2
AN8135			CAZyme	AN8135.2
AN8154			CAZyme	AN8154.2
AN8266			CAZyme	AN8266.2
AN8369		Has domain(s) with predicted role in biosynthetic process	CAZyme	AN8369.2	AA		AA
AN8465			CAZyme	AN8465.2
AN8481			CAZyme	AN8481.2
AN8627		Has domain(s) with predicted transferase activity, transferring glycosyl groups activity and membrane localization	CAZyme	AN8627.2			AA		AA		AA
AN8639		Putative alpha,alpha-trehalose-phosphate synthase (UDP-forming) with a predicted role in trehalose biosynthesis	CAZyme	AN8639.2	AA		AA		A-B	A-B	A-B	A-B
AN8806			CAZyme	AN8806.2
AN8891			CAZyme	AN8891.2
AN9069			CAZyme	AN9069.2
AN9170			CAZyme	AN9170.2
AN9213			CAZyme	AN9213.2
AN9260			CAZyme	AN9260.2
AN9329			CAZyme	AN9329.2 (frameshift)
AN9340			CAZyme	AN9340.2 (TreA)
AN9383			CAZyme	AN9383.2
AN9439			CAZyme	AN9439.2
AN9442			CAZyme	AN9442.2 (fragment)
AN0602			CAZyme	ANIA_00602
AN1043			CAZyme	ANIA_01043
AN1107			CAZyme	ANIA_01107 (AN1107.2) (fragment)
AN1742			CAZyme	ANIA_01742 (AN1742.2)
AN2633		Has domain(s) with predicted hydrolase activity, hydrolyzing O-glycosyl compounds activity and role in carbohydrate metabolic process	CAZyme	ANIA_02633 (short fragment)					AA		AA
AN5281		Putative pyranose oxidase	CAZyme	ANIA_05281							AA
AN5305			CAZyme	ANIA_05305
AN7949			CAZyme	ANIA_07949 (fragment)
AN10016			CAZyme	ANIA_10016
AN10060		Putative alpha-amylase; glycogen debranching enzyme	CAZyme	ANIA_10060	AA		AA		AA		AA
AN0494			CAZyme	cellobiohydrolase I (CBHI;CbhB;AN0494.2)
AN9390			CAZyme	chitinase C (ChiC;AN9390.2)
AN7180			CAZyme	cutinase (AN7180.2)
AN7541			CAZyme	cutinase (AN7541.2)
AN6352			CAZyme	endo-α-1,5-L-arabinosidase (AN6352.2)
AN5727			CAZyme	endo-β-1,4-galactanase (EnGAL;AN5727.2)
AN0452			CAZyme	endo-β-1,4-glucanase (xyloglucan-specific) (AN0452.2)
AN3358		Protein with endo-beta-(1,4)-mannanase activity, involved in degradation of mannans	CAZyme	endo-β-1,4-mannanase (ManA;AnMan5A;AN3358)					AA		AA
AN9045			CAZyme	exo-polygalacturonase (AN9045.2)
AN7533			CAZyme	exo-β-1,3-glucanase (Anid-Bgl502;AN7533)
AN1502			CAZyme	N-acetylglucosaminidase (NagA;AN1502.2)
AN7646			CAZyme	pectate lyase (AN7646.2)
AN2331			CAZyme	pectin lyase (AN2331.2)
AN2528			CAZyme	rhamnogalacturonan acetylesterase (AN2528.2)
AN7135			CAZyme	rhamnogalacturonan lyase (AN7135.2)
AN9134			CAZyme	rhamnogalacturonase (AN9134.2)
AN8677			CAZyme	UDP-D-Galf: β-1,5-/β-1,6-galactofuranosyltransferase (AN8677)
AN8149			CAZyme	α-1,2-L-fucosidase (AN8149.2)
AN2018			CAZyme	α-amylase (AmyA;AN2018.2)
AN2017			CAZyme	α-glucosidase (AgdA;AN2017.2)
AN1571			CAZyme	α-L-arabinofuranosidase (AbfB;AN1571.2)
AN4700			CAZyme	β-1,3-glucanase (AN4700.2)
AN3777			CAZyme	β-1,6-glucanase (Anid-Bgl503;AN3777)
AN2385			CAZyme	β-glucanase (AN2385.2)
AN2828			CAZyme	β-glucosidase (AN2828)
AN5309		Putative cutinase with a predicted role in the hydrolysis of cutin	CAZyme	AN5309.2					AB	AB	AA
AN7117			CAZyme	AN7117.2
AN7120			CAZyme	AN7120.2
AN7275			CAZyme	AN7275.2
AN7396			CAZyme	AN7396.2
AN8444			CAZyme	AN8444.2
AN8477		Putative beta-1,4-xylosidase	CAZyme	AN8477.2					AA
AN9276			CAZyme	AN9276.2
AN10919			CAZyme	ANIA_10919 (fragment)
AN7413			CAZyme	endo-β-1,4-mannanase (AnMan26A;AN7413.2)
AN3613			CAZyme	xylanase 1 (XlnA;X22;AN3613.2)
AN1804			CAZyme	β-glucosidase (AN1804.2)
AN6093			CAZyme	acetyl esterase (AnAXE;AN6093.2)
AN0550			CAZyme	AN0550.2
AN0567			CAZyme	AN0567 / ANIA_00567
AN0980			CAZyme	AN0980.2
AN1477			CAZyme	AN1477.2
AN2060			CAZyme	AN2060.2
AN2217			CAZyme	AN2217.2
AN2227			CAZyme	AN2227.2
AN2533		Putative alpha-L-arabinofuranosidase	CAZyme	AN2533.2					A/B	A/B
AN2632			CAZyme	AN2632.2
AN2664			CAZyme	AN2664.2
AN2709			CAZyme	AN2709.2 (frameshift)
AN3531			CAZyme	AN3531.2
AN3860			CAZyme	AN3860.2 (EglF)
AN3949			CAZyme	AN3949.2
AN5176			CAZyme	AN5176.2 (CbhA)
AN5976			CAZyme	AN5976.2
AN6472			CAZyme	AN6472.2
AN6620		Has domain(s) with predicted hydrolase activity, hydrolyzing O-glycosyl compounds activity and role in carbohydrate metabolic process	CAZyme	AN6620.2			AA
AN6751		Has domain(s) with predicted hydrolase activity, hydrolyzing O-glycosyl compounds activity and role in carbohydrate metabolic process	CAZyme	AN6751.2					AA
AN7598			CAZyme	AN7598.2
AN7828			CAZyme	AN7828.2
AN7864			CAZyme	AN7864.2
AN8472			CAZyme	AN8472.2
AN8480		Putative glucan 1,3-beta-glucosidase with a predicted role in glucan metabolism	CAZyme	AN8480.2	AA
AN8969			CAZyme	AN8969.2
AN9166			CAZyme	AN9166.2
AN5267			CAZyme	AnFAE;AN5267.2
AN8175			CAZyme	ANIA_08175
AN1285			CAZyme	endo-β-1,4-glucanase A (EglA; AN1285.2)
AN2710			CAZyme	endo-β-1,4-mannanase (AN2710;ANID_02710)
AN6470		Protein with lysozyme activity, involved in carbohydrate catabolism	CAZyme	lysozyme (AN6470.2)			AA
AN3337			CAZyme	pectate lyase (AN3337.2)
AN8453			CAZyme	pectate lyase (AN8453.2)
AN2569			CAZyme	pectin lyase (PL1;AN2569.2)
AN10277			CAZyme	rhamnogalacturonan α-L-rhamnohydrolase (RhaA;AN10277)
AN1818			CAZyme	xylanase (XlnC;X34;AN1818.2)
AN7152			CAZyme	α-galactosidase (AN7152.2)
AN0941			CAZyme	α-glucosidase (AgdE;AN0941.2)
AN1277			CAZyme	α-L-arabinofuranosidase (AN1277.2)
AN7151			CAZyme	α-L-rhamnosidase (RhaE;AN7151)
AN0712			CAZyme	β-glucosidase (AN0712.2)
AN8401			CAZyme	β-xylosidase / α-L-arabinofuranosidase (BxlB;AnXA;AN8401.2)
AN0756			CAZyme	AN0756.2
AN1273			CAZyme	AN1273.2
AN2804			CAZyme	AN2804.2
AN3046			CAZyme	AN3046.2
AN3196			CAZyme	AN3196.2
AN3201			CAZyme	AN3201 (BgaD)
AN3991			CAZyme	AN3991.2
AN5320			CAZyme	AN5320.2 (fragment)
AN6422		Has domain(s) with predicted hydrolase activity, hydrolase activity, acting on ester bonds activity and role in lipid metabolic process	CAZyme	AN6422.2					A/B	A/B
AN6428			CAZyme	AN6428.2
AN6786			CAZyme	AN6786.2
AN7230		Putative cellobiose dehydrogenase	CAZyme	AN7230.2					AA
AN7313			CAZyme	AN7313.2
AN7401			CAZyme	AN7401.2
AN7781		Putative alpha-L-arabinofuranosidase	CAZyme	AN7781.2					AA		AA
AN7812			CAZyme	AN7812.2
AN7891			CAZyme	AN7891.2
AN8314		Has domain(s) with predicted hydrolase activity	CAZyme	AN8314.2					AA
AN8392			CAZyme	AN8392.2
AN9524			CAZyme	AN9524.2
AN5282			CAZyme	cellobiohydrolase II (CBHII;AN5282.2)
AN9380		Putative chitin deacetylase; catalyzes the conversion of chitin to chitosan by the deacetylation of N-acetyl-D-glucosamine residues	CAZyme	chitin deacetylase (CDA;AnCDA;AN9380.2)			AA
AN8241			CAZyme	chitinase A (ChiA;AN8241.2)
AN3418			CAZyme	endo-β-1,4-glucanase (EglB;AN3418.2)
AN3297			CAZyme	endo-β-1,4-mannanase (ManB;AnMan5B;AN3297)
AN6427			CAZyme	endo-β-1,4-mannanase (ManC;AnMan5C;AN6427;ANID_06427)
AN1602		Putative beta-1,4-endoglucanase; protein with cellulase activity, involved in degradation of glucans	CAZyme	Lytic cellulose monooxygenase (C4-dehydrogenating) (AN1602)					AA		AA
AN5463			CAZyme	lytic starch monooxygenase (AnAA13;AN5463.2)
AN3390			CAZyme	pectin methyl esterase (PME;AN3390.2)
AN9286			CAZyme	xylan α-1,2-glucuronidase (AN9286.2)
AN7908			CAZyme	α-L-arabinofuranosidase (AN7908.2)
AN7505			CAZyme	α-xylosidase (AgdD;AN7505)
AN3368			CAZyme	β-mannosidase (AN3368.2)
				Number of AtfA or AtfB dependent genes in the group:	17	3	19	0	57	16	44	5
				Number of genes in the group:	399	399	399	399	399	399	399	399
				Number of AtfA or AtfB depenent genes:	329	96	240	9	1496	439	1143	155
				Totel number of genes:	10775	10775	10775	10775	10775	10775	10775	10775
				p-value (Fisher's exact test):	0.104	0.6957	0.001495	1	0.4291	0.5633	0.4153	0.6852

## Sheet: Antioxidative enzymes, Fe and S
Table S6 Characterization of AtfA- and AtfB-dependent genes by their known or putative functions.
Sheet 3 - Antioxidative enzyme, Fe-S cluster assembly, phosphorelay response regulator and transcription factor genes
a - According to Aspergillus Genome Database (http://www.aspgd.org/).
b - According to the reference(s) mentioned at the definition of the appropriate gene group in the Materials and methods chapter of the manuscript.
GENE ID	Gene namea	Description (AspGD)a	Groupb	Descriptionb	AtfA-dependent in untreated mycelial samples	AtfB-dependent in untreated mycelial samples	AtfA-dependent in MSB-treated mycelial samples	AtfB-dependent in MSB-treated mycelial samples	AtfA-dependent in untreated conidial samples	AtfB-dependent in untreated conidial samples	AtfA-dependent in MSB-treated conidial samples	AtfB-dependent in MSB-treated conidial samples
AN8637	catA	Conidia-specific catalase; predicted role in gluconic acid and gluconate metabolism	Antioxidative enzyme	catalase	AA		AA		AA		AA
AN9339	catB	Hyphal catalase with a predicted role in gluconic acid and gluconate metabolism	Antioxidative enzyme	catalase
AN5918	catC	Putative catalase with a predicted role in gluconic acid and gluconate metabolism	Antioxidative enzyme	catalase
AN8553		Putative catalase with a predicted role in gluconic acid and gluconate metabolism	Antioxidative enzyme	catalase					A-B	A-B	A-B	A-B
AN7388	cpeA	Putative catalase-peroxidase with a predicted role in gluconic acid and gluconate metabolism; protein also identified as laccase II which is expressed during sexual development	Antioxidative enzyme	catalase-peroxidase
AN7924		Has domain(s) with predicted peroxidase activity	Antioxidative enzyme	peroxidase
AN8395		Has domain(s) with predicted peroxidase activity	Antioxidative enzyme	peroxidase
AN2578		Has domain(s) with predicted peroxidase activity	Antioxidative enzyme	peroxidase			AA
AN6457		Has domain(s) with predicted peroxidase activity	Antioxidative enzyme	peroxidase					AA		AA
AN10220	ccp1	Putatice cytochrome c peroxidase; intracellular; protein abundance decreased by menadione stress	Antioxidative enzyme	cytochrome c peroxidase
AN5440		Putative cytochrome c peroxidase; expression upregulated after exposure to farnesol	Antioxidative enzyme	cytochrome c peroxidase
AN0241	sodA	Cu/Zn-superoxide dismutase; induced under iron starvation and repressed under copper starvation	Antioxidative enzyme	Cu/Zn-superoxide dismutase
AN5577	sodB	Manganese-superoxide dismutase	Antioxidative enzyme	Mn-superoxide dismutase					AA		AA
AN1131		Putative cytosolic Cu/Zn superoxide dismutase; transcript repressed by light in developmentally competent mycelia	Antioxidative enzyme	Cu/Zn-superoxide dismutase
AN0785	sodM	Putative manganese superoxide dismutase	Antioxidative enzyme	Mn-superoxide dismutase
AN9464		Has domain(s) with predicted electron transfer activity, protein disulfide oxidoreductase activity and role in cell redox homeostasis	Antioxidative enzyme	glutaredoxin
AN4215		Ortholog(s) have disulfide oxidoreductase activity, glutathione disulfide oxidoreductase activity, glutathione peroxidase activity, glutathione transferase activity	Antioxidative enzyme	glutaredoxin					AA		AA
AN4304		Ortholog(s) have 2 iron, 2 sulfur cluster binding, disulfide oxidoreductase activity, glutathione disulfide oxidoreductase activity	Antioxidative enzyme	glutaredoxin
AN7567		Ortholog(s) have 2 iron, 2 sulfur cluster binding, RNA polymerase II activating transcription factor binding, disulfide oxidoreductase activity, glutathione disulfide oxidoreductase activity, iron-sulfur cluster binding activity	Antioxidative enzyme	glutaredoxin					AA
AN2846	gpxA	Putative glutathione peroxidase with a predicted role in glutathione biosynthesis; protein induced by farnesol	Antioxidative enzyme	glutathione peroxidase
AN0629		Ortholog(s) have glutathione peroxidase activity, glutathione transferase activity, role in glutathione metabolic process, protein glutathionylation and cytoplasm, endoplasmic reticulum localization	Antioxidative enzyme	glutathione peroxidase/S-transferase
AN0932	glrA	Putative glutathione oxidoreductase with a predicted role in glutathione biosynthesis	Antioxidative enzyme	glutathione reductase
AN10379		Has domain(s) with predicted glutathione transferase activity	Antioxidative enzyme	glutathione-S-transferase					AA
AN5831		Ortholog of A. nidulans FGSC A4 : AN10273/gst3, A. fumigatus Af293 : Afu2g15770, A. niger CBS 513.88 : An15g06030, An05g00350 and A. oryzae RIB40 : AO090011000920	Antioxidative enzyme	glutathione-S-transferase
AN3255		Predicted glutathione peroxidase; predicted secondary metabolism gene cluster member	Antioxidative enzyme	glutathione-S-transferase	AA				AA		AA
AN6024	gstB	Protein with glutathione S-transferase and glutathione peroxidase activities; intracellular, menadione stress-induced protein	Antioxidative enzyme	glutathione-S-transferase	AA
AN10273	gst3	Putative glutathione S-transferase; intracellular, menadione stress-induced protein	Antioxidative enzyme	glutathione-S-transferase					AA
AN4905	gstA	theta class glutathione S-transferase; involved in resistance to a variety of xenobiotics and metals; confers susceptibility to the systemic fungicide carboxin	Antioxidative enzyme	glutathione-S-transferase
AN10223	tpxA	Putative 1-Cys peroxiredoxin; intracellular; protein abundance decreased by menadione stress; expression reduced after exposure to farnesol	Antioxidative enzyme	peroxiredoxin
AN3973	tpxB	Putative peroxiredoxin	Antioxidative enzyme	peroxiredoxin					AA		AA
AN1252		Has domain(s) with predicted peroxiredoxin activity and role in oxidation-reduction process	Antioxidative enzyme	peroxiredoxin
AN4023		Has domain(s) with predicted peroxiredoxin activity and role in oxidation-reduction process	Antioxidative enzyme	peroxiredoxin
AN5232		Has domain(s) with predicted peroxiredoxin activity and role in oxidation-reduction process	Antioxidative enzyme	peroxiredoxin
AN8080		Ortholog(s) have thioredoxin peroxidase activity, role in cell redox homeostasis, cellular response to oxidative stress, response to metal ion and cytoplasm, hyphal cell wall, intracellular, peroxisome, yeast-form cell wall localization	Antioxidative enzyme	thioredoxin peroxidase
AN8218	trxB	Putative thioredoxin reductase	Antioxidative enzyme	thioredoxin reductase
AN3581	trxR	Thioredoxin reductase with a predicted role in pyrimidine metabolism; putative flavoprotein; intracellular, menadione stress-induced protein; transcripts of two different sizes have been detected	Antioxidative enzyme	thioredoxin reductase
AN0170	trxA	Thioredoxin; predicted role in cell redox homeostasis; required for conidiation; expression upregulated after exposure to farnesol	Antioxidative enzyme	thioredoxin
AN8692	prxA	Thioredoxin-dependent peroxidase; intracellular; PRX5-like domain; highly similar to the allergen Aspf3 from related fungi; menadione stress-repressed protein; osmoadaptation-induced protein; repressed by starvation-induced autophagy	Antioxidative enzyme	thioredoxin peroxidase
				Number of AtfA or AtfB dependent genes in the group:	3	0	2	0	10	1	7	1
				Number of genes in the group:	38	38	38	38	38	38	38	38
				Number of AtfA or AtfB depenent genes:	329	96	240	9	1496	439	1143	155
				Totel number of genes:	10775	10775	10775	10775	10775	10775	10775	10775
				p-value (Fisher's exact test):	0.1089	1	0.2072	1	0.03088	0.7947	0.1017	0.4239
GENE ID	Gene name	Description (AspGD)	Group	Description	AtfA-dependent in untreated mycelial samples	AtfB-dependent in untreated mycelial samples	AtfA-dependent in MSB-treated mycelial samples	AtfB-dependent in MSB-treated mycelial samples	AtfA-dependent in untreated conidial samples	AtfB-dependent in untreated conidial samples	AtfA-dependent in MSB-treated conidial samples	AtfB-dependent in MSB-treated conidial samples
AN0447		Has domain(s) with predicted iron ion binding, iron-sulfur cluster binding activity and role in iron-sulfur cluster assembly	Iron-sulfur cluster assembly						AA		AA
AN10012		Ortholog(s) have role in protein maturation by [2Fe-2S] cluster transfer, protein maturation by [4Fe-4S] cluster transfer and mitochondrial matrix, mitochondrion localization	Iron-sulfur cluster assembly						AA		AA
AN10237		Has domain(s) with predicted iron-sulfur cluster binding, structural molecule activity and role in iron-sulfur cluster assembly, protein maturation by iron-sulfur cluster transfer	Iron-sulfur cluster assembly						AA		AA
AN10584		Ortholog(s) have cysteine desulfurase activity, role in iron-sulfur cluster assembly and L-cysteine desulfurase complex, extrinsic component of mitochondrial inner membrane, mitochondrial matrix localization	Iron-sulfur cluster assembly
AN11060		Ortholog(s) have 4 iron, 4 sulfur cluster binding, ATPase activity, role in iron-sulfur cluster assembly, tRNA wobble uridine modification and Nbp35-Cfd1 ATPase complex, cytoplasm localization	Iron-sulfur cluster assembly
AN12201		Ortholog(s) have oxidoreductase activity, acting on NAD(P)H, heme protein as acceptor activity, role in heme a biosynthetic process, iron-sulfur cluster assembly, ubiquinone biosynthetic process and mitochondrial matrix localization	Iron-sulfur cluster assembly
AN1385		Ortholog(s) have role in protein maturation by iron-sulfur cluster transfer, tRNA wobble uridine modification and CIA complex, cytosol, nucleus localization	Iron-sulfur cluster assembly
AN1407		Ortholog(s) have role in iron-sulfur cluster assembly and CIA complex localization	Iron-sulfur cluster assembly
AN1469		Ortholog(s) have ATPase activator activity, chaperone binding activity	Iron-sulfur cluster assembly
AN1986		Ortholog(s) have ferrous iron binding, ferroxidase activity, iron chaperone activity and role in cellular iron ion homeostasis, cellular response to oxidative stress, glutathione metabolic process, iron-sulfur cluster assembly	Iron-sulfur cluster assembly						AA		AA
AN2155		Ortholog(s) have 4 iron, 4 sulfur cluster binding, ATPase activity, iron ion binding activity, role in iron-sulfur cluster assembly, tRNA wobble uridine modification and Nbp35-Cfd1 ATPase complex, cytoplasm, nucleus localization	Iron-sulfur cluster assembly
AN2508		Ortholog(s) have cysteine desulfurase activity	Iron-sulfur cluster assembly						AA		AA
AN3632		Ortholog(s) have role in iron-sulfur cluster assembly and cytosol, membrane localization	Iron-sulfur cluster assembly
AN4297		Ortholog(s) have role in iron-sulfur cluster assembly, mitochondrial respiratory chain complex I assembly and mitochondrial respiratory chain complex I, peripheral segment, mitochondrion, plasma membrane localization	Iron-sulfur cluster assembly
AN4655		Ortholog(s) have 2 iron, 2 sulfur cluster binding, ATPase activator activity, ferrous iron binding, iron ion binding, iron-sulfur cluster binding, iron-sulfur cluster carrier activity, zinc ion binding activity	Iron-sulfur cluster assembly						AA		AA
AN5953		Ortholog(s) have iron ion binding activity and role in biotin biosynthetic process, iron-sulfur cluster assembly, protein maturation by [4Fe-4S] cluster transfer, protein maturation by iron-sulfur cluster transfer	Iron-sulfur cluster assembly						AA
AN8485		Has domain(s) with predicted iron-sulfur cluster binding activity, role in apoptotic process, iron-sulfur cluster assembly and cytoplasm localization	Iron-sulfur cluster assembly
AN4304		Ortholog(s) have 2 iron, 2 sulfur cluster binding, disulfide oxidoreductase activity, glutathione disulfide oxidoreductase activity	Iron-sulfur cluster assembly
AN11837		Ortholog(s) have role in [4Fe-4S] cluster assembly, protein maturation by [4Fe-4S] cluster transfer and mitochondrial matrix localization	Iron-sulfur cluster assembly
				Number of AtfA or AtfB dependent genes in the group:	0	0	0	0	7	0	6	0
				Number of genes in the group:	19	19	19	19	19	19	19	19
				Number of AtfA or AtfB depenent genes:	329	96	240	9	1496	439	1143	155
				Totel number of genes:	10775	10775	10775	10775	10775	10775	10775	10775
				p-value (Fisher's exact test):	1	1	1	1	0.01075	1	0.01132	1
GENE ID	Gene namea	Description (AspGD)a	Groupb	AtfA-dependent in untreated mycelial samples	AtfB-dependent in untreated mycelial samples	AtfA-dependent in MSB-treated mycelial samples	AtfB-dependent in MSB-treated mycelial samples	AtfA-dependent in untreated conidial samples	AtfB-dependent in untreated conidial samples	AtfA-dependent in MSB-treated conidial samples	AtfB-dependent in MSB-treated conidial samples
AN1800	tcsB	Transmembrane histidine kinase, part of a two-component signal transducer involved in the HOG signaling pathway that regulates osmotic stress response' transcript upregulated by growth in glycerol	Phosphorelay response regulator activity
AN2363	hk-8-6	Putative histidine-containing phosphotransfer protein	Phosphorelay response regulator activity
AN2581	hk-8-1	Putative histidine-containing phosphotransfer protein	Phosphorelay response regulator activity	AA		AA		AA		AA
AN3101	phkB	Putative histidine-containing phosphotransfer protein	Phosphorelay response regulator activity					AA		AA
AN3102	phkA	Putative histidine-containing phosphotransfer protein	Phosphorelay response regulator activity
AN3214	hk-8-5	Putative histidine-containing phosphotransfer protein	Phosphorelay response regulator activity
AN4113	hk-8-2	Histidine kinase, histidine-containing phosphotransfer protein; expression upregulated after exposure to farnesol; palA-dependent expression independent of pH	Phosphorelay response regulator activity			AA		AA		AA
AN4447	hk-9	Putative histidine-containing phosphotransfer protein	Phosphorelay response regulator activity
AN4479	nikA	Putative histidine-specific protein kinase, part of a two-component signal transduction phosphorelay system involved in response to fungicides; mutant has a strong growth defect	Phosphorelay response regulator activity
AN4818	hk-8-4	Putative histidine-containing phosphotransfer protein	Phosphorelay response regulator activity
AN5296	tcsA	Two-component signaling protein with histidine kinase and response regulator domains; involved in control of conidiation	Phosphorelay response regulator activity
AN6820	hk-8-3	Putative histidine-containing phosphotransfer protein	Phosphorelay response regulator activity					AA		AA
AN7945	hk2	Putative histidine-containing phosphotransfer protein	Phosphorelay response regulator activity	AA		AA		AA		AA
AN9008	fphA	Phytochrome photoreceptor, a red-light sensor that represses sexual development under red light; activator of polarized growth in the dark; binds chromophore biliverdin; interacts with VeA and LreB	Phosphorelay response regulator activity
AN9048	hk-8-7	Putative histidine-containing phosphotransfer protein	Phosphorelay response regulator activity
AN4134	srrC	Putative kinase response regulator of a two-component phosphorelay system	Phosphorelay response regulator activity
AN7697	sskA	Response regulator, part of a two-component signal transducer involved in the HOG signaling pathway that regulates osmotic stress response; transcript induced by hydrogen peroxide; null spores are heat labile and lose viability at 4 degrees	Phosphorelay response regulator activity
AN2005	ypdA	Histidine-containing phosphotransfer protein, part of a two-component signal transducer involved in the HOG signaling pathway that regulates osmotic stress response	Phosphorelay response regulator activity					AA		AA
			Number of AtfA or AtfB dependent genes in the group:	2	0	3	0	6	0	6	0
			Number of genes in the group:	18	18	18	18	18	18	18	18
			Number of AtfA or AtfB depenent genes:	329	96	240	9	1496	439	1143	155
			Totel number of genes:	10775	10775	10775	10775	10775	10775	10775	10775
			p-value (Fisher's exact test):	0.1032	1	0.006953	1	0.02975	1	0.008493	1
GENE ID	Gene name	Description (AspGD)	Group	AtfA-dependent in untreated mycelial samples	AtfB-dependent in untreated mycelial samples	AtfA-dependent in MSB-treated mycelial samples	AtfB-dependent in MSB-treated mycelial samples	AtfA-dependent in untreated conidial samples	AtfB-dependent in untreated conidial samples	AtfA-dependent in MSB-treated conidial samples	AtfB-dependent in MSB-treated conidial samples
AN2270	amdA	C2H2 zinc-finger transcription factor involved in regulation of structural genes for acetamidase (amdS), formate dehydrogenase (aciA), and alcohol dehydrogenase II (alcB)	Transcription factor
AN4035	amdR	Positively acting regulatory gene; putative Zn(II)2Cys6 transcription factor; inducer of acetamide and enzymes of omega amino acid and lactam catabolism	Transcription factor
AN9492	amdX	C2H2 zinc-finger transcription factor involved in regulation of acetamide catabolism; regulates amdS transcription	Transcription factor
AN7734	anbH1	Basic-region helix-loop-helix (bHLH) transcription factor; represses expression of the penicillin biosynthesis gene aatA	Transcription factor
AN8414	apdR	Putative transcription factor; member of the aspyridone (apd) gene cluster; role in aspyridone production	Transcription factor
AN0388	araR	Zn(2)Cys(6) binuclear cluster domain transcription factor involved in regulation of genes of pentose catabolism	Transcription factor
AN0202	arcA	Putative zinc-finger transcription factor of the Zn(II)2Cys6 type involved in regulation of arginine catabolism; acts as a transcriptional activator of arginase (agaA) and ornithine transaminase (otaA) genes	Transcription factor
AN8667	areA	Wide-domain GATA-type transcription factor; mediates nitrogen metabolite repression; transcript induced by nitrogen starvation and degraded in response to ammonium or glutamine; AreA accumulates in the nucleus during nitrogen starvation	Transcription factor
AN6221	areB	Putative GATA zinc finger transcription factor; leucine zipper motif; negative regulator of nitrogen catabolism; locus is predicted to encode areB-alpha, -beta, and -gamma transcripts	Transcription factor
AN5583	aslA	Putative C2H2 zinc finger transcription factor, involved in vacuolar sequestration of potassium and vacuolar biogenesis	Transcription factor
AN0973	brlA	C2H2 zinc finger transcription factor, fphA- and lreB-dependent light induced regulator of conidiophore development; locus has 2 overlapping transcriptional units called brlA alpha and brlA beta; see 5' brlA micro-ORF, AN0974	Transcription factor			AA
AN6446	cicD	Predicted transcription factor; coregulated with the NRPS/AN6444; encoded within the cichorine gene cluster; possible transcriptional regulator of cluster	Transcription factor
AN5808	clrA	Zn(II)2Cys6 transcription factor; predicted regulator of cellulose degradation; mutant deficient for growth on cellobiose and for xylanase and cellulase activity when pregrown on glucose and shifted to Avicel medium	Transcription factor
AN3369	clrB	Zn(II)2Cys6 transcription factor; regulator of cellulose degradation gene expression; mutant deficient for growth on cellobiose and for xylanase and cellulase activity when pregrown on glucose and shifted to Avicel medium	Transcription factor
AN5726	crzA	C2H2-type zinc finger transcription factor involved in cation homeostasis; localized to nucleus in the presence of calcium, manganese or alkaline ambient pH stress; up-regulated under osmotic stress conditions; calcineurin substrate	Transcription factor
AN7896	dbaA	Zn(II)2Cys6 transcription factor with a role in secondary metabolite biosynthesis; member of the dba gene cluster; overexpression upregulates dba gene cluster expression; dba cluster expression is coregulated	Transcription factor
AN7901	dbaG	Putative fungal transcription factor (no conserved domain); member of the dba gene cluster; dba cluster expression is coregulated	Transcription factor
AN7553	devR	Basic helix-loop-helix transcription factor required for normal conidiophore development; mutants are infertile in self-crosses	Transcription factor
AN2094	dopA	Putative leucine-zipper transcription factor, involved in conidiophore morphogenesis and sexual development	Transcription factor
AN7050	farA	Putative transcription factor containing a Zn2-Cys6 binuclear cluster domain; required for transcriptional activation of genes involved in fatty acid utilization; highly conserved in filamentous ascomycetes	Transcription factor
AN1425	farB	Putative transcription factor containing a Zn2-Cys6 binuclear cluster domain; required for transcriptional activation of genes involved in utilization of short-chain fatty acids; highly conserved in filamentous ascomycetes	Transcription factor							AA
AN7542	flbB	Basic leucine zipper transcription factor involved in regulation of conidiophore development; localizes to the most apical nucleus and the tip of mature vegetative hyphae; required for light-dependent activation of brlA transcription	Transcription factor
AN2421	flbC	Putative C2H2 zinc finger transcription factor; involved in regulation of conidiophore development; required for light-dependent activation of brlA transcription	Transcription factor
AN0279	flbD	Putative transcription factor involved in regulation of asexual and sexual development and in response to nitrogen starvation; contains a myb-like DNA-binding domain	Transcription factor
AN0721	flbE	Protein involved in regulation of conidiophore development; interacts with putative transcription factor FlbB; specific to filamentous fungi	Transcription factor
AN10550	galR	Zn(2)Cys(6) binuclear cluster domain transcription factor involved in regulation of genes of galactose conversion pathway	Transcription factor
AN10543	galX	Putative transcription factor required for galactose utilization	Transcription factor
AN9397	hacA	Putative basic leucine zipper (bZIP) transcription factor that regulates the unfolded protein response; hacA mRNA expression increased in the presence of farnesol	Transcription factor
AN8251	hapX	bZIP transcription factor; physically interacts with CCAAT-complex protein HapB and HapE by two-hybrid; synthetically lethal with sreA; expression repressed by iron; mutants have increased ferricrocin and decreased triacetyl fusarinine C	Transcription factor
AN8035	hsf1	Putative transcription factor; hsf1 mRNA expression increased in the presence of farnesol	Transcription factor
AN1812	jlbA	bZIP transcription factor; induced in response to amino acid starvation	Transcription factor
AN3435	lreA	Putative zinc-finger transcription factor involved in blue-light responsive differentiation; interacts with LreB; similar to N. crassa blue-light-sensing component WC-1	Transcription factor							AA
AN3607	lreB	Putative zinc-finger transcription factor involved in blue-light responsive differentiation; interacts with VeA, FphA, and LreA; similar to N. crassa blue-light-sensing component WC-2	Transcription factor					AA		AA
AN2996	mbf1	Putative transcription factor; ortholog of S. cerevisiae Mbf1p; expression upregulated after exposure to farnesol	Transcription factor
AN8676	mcmA	Putative MADS-box family transcription factor; ORF that was absent from the original release of version 4 of the A. nidulans annotation, but present in a previous version; reinstated into version 4 in AspGD as of July 2009	Transcription factor
AN8858	mcnB	Forkhead-like transcription factor; multi-copy suppressor of nimA1	Transcription factor
AN0148	mdpE	C6 zinc finger transcription factor similar to AflR; member of the monodictyphenone secondary metabolite biosynthesis gene cluster; required for synthesis of monodictyphenone and related compounds but not prenyl xanthones	Transcription factor
AN5218	metZ	Putative bZIP transcription factor involved in regulation of sulfur metabolism	Transcription factor
AN1652	msnA	Putative zinc-finger transcription factor; induced under high-salt conditions	Transcription factor
AN8741	mtfA	Putative C2H2 transcription factor involved in regulation of secondary metabolism and morphogenesis	Transcription factor
AN7513	napA	Homologous to bZIP family transcription factor human AP-1 and Aspergillus nidulans AtfA	Transcription factor
AN1848	nosA	Zinc(II)2Cys6 putative transcription factor involved in the regulation of sexual development; mutant produces immature cleistothecia and reduced numbers of ascospores	Transcription factor
AN4263	nsdC	C2H2 zinc finger transcription factor; required for sexual development; vegetative growth reduced and asexual development derepressed in null mutant; mRNA increased during sexual development and under hypoxic conditions	Transcription factor
AN3152	nsdD	Predicted GATA-type zinc-finger transcription factor required for sexual development; transcript induced by nitrositive stress	Transcription factor
AN2855	pacC	C2H2 finger domain transcription factor; undergoes proteolytic activation in response to alkaline ambient pH; physically interacts with PalA by two-hybrid analysis	Transcription factor
AN8271	palcA	Predicted basic helix-loop-helix transcription factor, involved in regulation of phosphate acquisition	Transcription factor
AN1599	pbcR	Zn(II)(2)Cys(6)-type transcription factor; responsible for the production of the diterpene compound, ent-pimara-8(14),15-diene; member of the PbcR-activated diterpene cluster	Transcription factor			AA
AN1134	qutA	Putative zinc-finger transcription factor, positive regulator of the quinic acid utilization (qut) cluster	Transcription factor
AN5673	rhaR	Putative transcription factor involved in regulation of rhamnose utilization; possible pseudogene	Transcription factor
AN2984	rlmA	Putative MADS-box family transcription factor; regulates cell wall hydrolase gene expression and autolysis; mutants have abnormal conidiophores arrested at metula formation	Transcription factor
AN5170	rosA	Putative Zn(II)2Cys6 transcription factor; negative regulator of sexual development	Transcription factor
AN4562	rsmA	Basic leucine zipper (bZIP) type transcription factor involved in regulation of secondary metabolism	Transcription factor
AN0273	rsrA	Putative transcription factor; involved in oxidative stress response; transcript upregulated in response to camptothecin	Transcription factor
AN1303	scfA	Putative Zn2-Cys6 binuclear cluster domain transcription factor; required for transcriptional activation of genes involved in utilization of short-chain fatty acids; transcript repressed by nitrogen limitation	Transcription factor
AN3492	scpR	C2H2 type zinc finger transcription factor; regulator of asperfuranone biosynthesis; inp secondary metabolite gene cluster member	Transcription factor
AN2919	sltA	C2H2 zinc-finger transcription factor involved in cation homeostasis; involved in response to abiotic stress; transcript upregulated in response to camptothecin; necessary for growth on pH 8 medium	Transcription factor
AN0176	sreA	Predicted GATA transcription factor involved in iron uptake, acts as a repressor of siderophore biosynthesis under high-iron conditions; mutants accumulate increased amounts of iron	Transcription factor
AN2290	steA	STE-like transcription factor with homeobox and zinc finger domains; null mutation blocks sexual cycle but not asexual development, forms Hulle cells but no ascogenous tissue nor cleistothecia	Transcription factor
AN5836	stuA	APSES domain transcription factor involved in regulation of conidiophore development; represses abaA and other developmentally regulated genes; locus consists of stuA-alpha and stuA-beta transcriptional units; stuA-alpha contains a uORF	Transcription factor
AN10492	thiA	Ortholog(s) have phosphoprotein binding activity	Transcription factor
AN0891	uaY	Zn(2)-Cys(6) binuclear cluster domain transcription factor required for positive regulation of genes involved in purine degradation pathway in response to uric acid; homology to Neurospora crassa pco-1	Transcription factor
AN7610	xlnR	Predicted GAL4-type zinc finger transcription factor involved in regulation of genes of xylan degradation; regulated by CreA, the mediator of carbon catabolite repression; transcriptionally induced by growth on xylose	Transcription factor
AN1414	xprG	p53-like transcription factor that contains a Ndt80-like DNA-binding domain; transcriptional regulator of extracellular proteases; putative acid phosphatase with a predicted role in gluconic acid and gluconate metabolism	Transcription factor
AN1265	zapA	Putative transcription factor, similar to S.cerevisiae ZAP1 and A. fumigatus zafA, which are regulators of zinc homeostasis	Transcription factor
AN11891	zipA	Putative bZIP transcription factor	Transcription factor
AN8772	zipB	Putative bZIP transcription factor	Transcription factor
AN10378	zipC	Putative bZIP transcription factor	Transcription factor
AN0026		Has domain(s) with predicted DNA binding, DNA-binding transcription factor activity, RNA polymerase II-specific, zinc ion binding activity and role in regulation of transcription, DNA-templated, transcription, DNA-templated	Transcription factor
AN0096		Has domain(s) with predicted DNA binding, DNA-binding transcription factor activity, RNA polymerase II-specific, nucleic acid binding, zinc ion binding activity	Transcription factor
AN0162		Has domain(s) with predicted DNA binding, DNA-binding transcription factor activity and role in regulation of transcription, DNA-templated	Transcription factor
AN0197		Has domain(s) with predicted DNA-binding transcription factor activity, RNA polymerase II-specific, zinc ion binding activity, role in regulation of transcription, DNA-templated and nucleus localization	Transcription factor					A/B	A/B	AA
AN0223		Has domain(s) with predicted DNA-binding transcription factor activity, DNA-binding transcription factor activity, RNA polymerase II-specific, zinc ion binding activity and role in regulation of transcription, DNA-templated	Transcription factor
AN0312		Ortholog(s) have RNA polymerase I general transcription initiation factor activity and role in transcription initiation from RNA polymerase I promoter	Transcription factor
AN0364		Has domain(s) with predicted DNA-binding transcription factor activity, RNA polymerase II-specific, zinc ion binding activity, role in regulation of transcription, DNA-templated and nucleus localization	Transcription factor
AN0407		Ortholog(s) have RNA polymerase III general transcription initiation factor activity, chromatin insulator sequence binding activity and role in transcription initiation from RNA polymerase III promoter	Transcription factor
AN0507		Has domain(s) with predicted DNA binding, DNA-binding transcription factor activity, RNA polymerase II-specific, zinc ion binding activity and role in regulation of transcription, DNA-templated, transcription, DNA-templated	Transcription factor
AN0533		Putative transcription factor; predicted role in secondary metabolite production	Transcription factor
AN0585		Has domain(s) with predicted DNA-binding transcription factor activity, RNA polymerase II-specific, zinc ion binding activity, role in regulation of transcription, DNA-templated and nucleus localization	Transcription factor			AA
AN0619		Has domain(s) with predicted DNA binding, DNA-binding transcription factor activity, RNA polymerase II-specific, zinc ion binding activity and role in regulation of transcription, DNA-templated, transcription, DNA-templated	Transcription factor
AN0658		Has domain(s) with predicted DNA binding, DNA-binding transcription factor activity, copper ion binding activity, role in regulation of transcription, DNA-templated and host cell nucleus, nucleus localization	Transcription factor
AN0671		Has domain(s) with predicted DNA-binding transcription factor activity, sequence-specific DNA binding activity and role in regulation of transcription, DNA-templated	Transcription factor
AN0680		Has domain(s) with predicted DNA-binding transcription factor activity, RNA polymerase II-specific, zinc ion binding activity, role in regulation of transcription, DNA-templated and nucleus localization	Transcription factor
AN0718		Has domain(s) with predicted DNA binding, DNA-binding transcription factor activity, RNA polymerase II-specific, zinc ion binding activity and role in regulation of transcription, DNA-templated, transcription, DNA-templated	Transcription factor
AN0737		Possible pseudogene, similar to Zn(II)2Cys6 transcription factor	Transcription factor
AN0738		Has domain(s) with predicted DNA-binding transcription factor activity, RNA polymerase II-specific, zinc ion binding activity, role in regulation of transcription, DNA-templated and nucleus localization	Transcription factor
AN0742		Has domain(s) with predicted DNA binding, DNA-binding transcription factor activity, RNA polymerase II-specific, zinc ion binding activity and role in regulation of transcription, DNA-templated, transcription, DNA-templated	Transcription factor
AN0748		Has domain(s) with predicted DNA-binding transcription factor activity, sequence-specific DNA binding activity and role in regulation of transcription, DNA-templated	Transcription factor
AN0816		Ortholog(s) have TBP-class protein binding, transcription coregulator activity and role in RNA polymerase II preinitiation complex assembly, transcription initiation from RNA polymerase II promoter	Transcription factor
AN0817		Ortholog(s) have DNA-binding transcription factor activity, RNA polymerase II-specific activity	Transcription factor					AA
AN0835		Has domain(s) with predicted DNA-binding transcription factor activity, RNA polymerase II-specific, zinc ion binding activity, role in regulation of transcription, DNA-templated and nucleus localization	Transcription factor
AN0853		Has domain(s) with predicted DNA binding, DNA-binding transcription factor activity, RNA polymerase II-specific, zinc ion binding activity and role in regulation of transcription, DNA-templated, transcription, DNA-templated	Transcription factor
AN0885		Has domain(s) with predicted DNA binding, DNA-binding transcription factor activity, sequence-specific DNA binding activity and role in regulation of transcription, DNA-templated	Transcription factor
AN0902		Has domain(s) with predicted DNA-binding transcription factor activity, RNA polymerase II-specific, zinc ion binding activity, role in regulation of transcription, DNA-templated and nucleus localization	Transcription factor
AN0937		Has domain(s) with predicted DNA binding, DNA-binding transcription factor activity, RNA polymerase II-specific, zinc ion binding activity and role in regulation of transcription, DNA-templated, transcription, DNA-templated	Transcription factor
AN0989		Has domain(s) with predicted role in DNA-templated transcription, initiation and transcription factor TFIID complex localization	Transcription factor
AN10059		Putative Zn(II)C6 domain containing transcription factor; predicted NirA binding site in promoter; transcript repressed by nitrate	Transcription factor
AN10083		Has domain(s) with predicted DNA-binding transcription factor activity, DNA-binding transcription factor activity, RNA polymerase II-specific, zinc ion binding activity and role in regulation of transcription, DNA-templated	Transcription factor
AN10120		Has domain(s) with predicted DNA binding, DNA-binding transcription factor activity, RNA polymerase II-specific, zinc ion binding activity and role in regulation of transcription, DNA-templated, transcription, DNA-templated	Transcription factor
AN10128		Has domain(s) with predicted DNA binding, DNA-binding transcription factor activity, RNA polymerase II-specific, zinc ion binding activity and role in regulation of transcription, DNA-templated, transcription, DNA-templated	Transcription factor
AN10151		Possible pseudogene, similar to Zn(II)2Cys6 transcription factor	Transcription factor
AN10262		Has domain(s) with predicted DNA-binding transcription factor activity, DNA-binding transcription factor activity, RNA polymerase II-specific, zinc ion binding activity and role in regulation of transcription, DNA-templated	Transcription factor
AN1028		Has domain(s) with predicted DNA-binding transcription factor activity, RNA polymerase II-specific, zinc ion binding activity, role in regulation of transcription, DNA-templated and nucleus localization	Transcription factor
AN10294		Has domain(s) with predicted DNA-binding transcription factor activity, RNA polymerase II-specific, zinc ion binding activity, role in regulation of transcription, DNA-templated and nucleus localization	Transcription factor					AA		AA
AN10300		Has domain(s) with predicted DNA-binding transcription factor activity, RNA polymerase II-specific, zinc ion binding activity, role in regulation of transcription, DNA-templated and nucleus localization	Transcription factor					AA
AN10331		Has domain(s) with predicted DNA binding, DNA-binding transcription factor activity, RNA polymerase II-specific, zinc ion binding activity and role in regulation of transcription, DNA-templated, transcription, DNA-templated	Transcription factor
AN10334		Has domain(s) with predicted DNA binding, DNA-binding transcription factor activity, DNA-binding transcription factor activity, RNA polymerase II-specific, sequence-specific DNA binding, zinc ion binding activity	Transcription factor
AN10341		Possible pseudogene, similar to Myb-like transcription factor	Transcription factor
AN10384		Possible C6 transcription factor; ortholog of A. fumigatus Afu2g07480 and Afu5g14530	Transcription factor
AN10463		Has domain(s) with predicted DNA binding, DNA-binding transcription factor activity, RNA polymerase II-specific, zinc ion binding activity and role in regulation of transcription, DNA-templated, transcription, DNA-templated	Transcription factor
AN10467		Has domain(s) with predicted DNA-binding transcription factor activity, RNA polymerase II-specific, zinc ion binding activity, role in regulation of transcription, DNA-templated and nucleus localization	Transcription factor
AN10491		Putative transcription factor; predicted role in secondary metabolite production	Transcription factor
AN10501		Ortholog(s) have RNA polymerase I core promoter sequence-specific DNA binding activity and role in positive regulation of transcription initiation from RNA polymerase II promoter, transcription initiation from RNA polymerase I promoter	Transcription factor
AN10541		Has domain(s) with predicted DNA binding, DNA-binding transcription factor activity, RNA polymerase II-specific, nucleic acid binding, protein kinase regulator activity, zinc ion binding activity	Transcription factor
AN10548		Has domain(s) with predicted DNA binding, DNA-binding transcription factor activity, RNA polymerase II-specific, zinc ion binding activity and role in regulation of transcription, DNA-templated, transcription, DNA-templated	Transcription factor					AA		AA
AN10597		Has domain(s) with predicted DNA-binding transcription factor activity, RNA polymerase II-specific, zinc ion binding activity, role in regulation of transcription, DNA-templated and nucleus localization	Transcription factor
AN10600		Predicted transcription factor; secondary metabolite gene cluster member; coregulated with the NRPS AN4827	Transcription factor
AN10606		Has domain(s) with predicted DNA-binding transcription factor activity, RNA polymerase II-specific, zinc ion binding activity, role in regulation of transcription, DNA-templated and nucleus localization	Transcription factor
AN10659		Has domain(s) with predicted DNA binding, DNA-binding transcription factor activity, RNA polymerase II-specific, zinc ion binding activity and role in regulation of transcription, DNA-templated, transcription, DNA-templated	Transcription factor
AN10670		Has domain(s) with predicted DNA binding, DNA-binding transcription factor activity, RNA polymerase II-specific, zinc ion binding activity and role in regulation of transcription, DNA-templated, transcription, DNA-templated	Transcription factor
AN10697		Has domain(s) with predicted DNA binding, DNA-binding transcription factor activity, RNA polymerase II-specific, zinc ion binding activity and role in regulation of transcription, DNA-templated, transcription, DNA-templated	Transcription factor					AA		AA
AN1077		Has domain(s) with predicted DNA binding, DNA-binding transcription factor activity, RNA polymerase II-specific, zinc ion binding activity and role in regulation of transcription, DNA-templated, transcription, DNA-templated	Transcription factor
AN10775		Has domain(s) with predicted DNA-binding transcription factor activity, RNA polymerase II-specific, zinc ion binding activity, role in regulation of transcription, DNA-templated and nucleus localization	Transcription factor
AN10789		Has domain(s) with predicted DNA binding, DNA-binding transcription factor activity, RNA polymerase II-specific, zinc ion binding activity and role in regulation of transcription, DNA-templated, transcription, DNA-templated	Transcription factor
AN10897		Has domain(s) with predicted DNA-binding transcription factor activity, RNA polymerase II-specific, zinc ion binding activity, role in regulation of transcription, DNA-templated and nucleus localization	Transcription factor					A/B	A/B
AN10910		Has domain(s) with predicted DNA binding, DNA-binding transcription factor activity, RNA polymerase II-specific, nucleic acid binding, zinc ion binding activity	Transcription factor
AN10911		Has domain(s) with predicted DNA-binding transcription factor activity, RNA polymerase II-specific, zinc ion binding activity, role in regulation of transcription, DNA-templated and nucleus localization	Transcription factor
AN10912		Has domain(s) with predicted DNA-binding transcription factor activity, RNA polymerase II-specific, zinc ion binding activity, role in regulation of transcription, DNA-templated and nucleus localization	Transcription factor
AN10957		Has domain(s) with predicted DNA binding, DNA-binding transcription factor activity, RNA polymerase II-specific, zinc ion binding activity and role in regulation of transcription, DNA-templated, transcription, DNA-templated	Transcription factor
AN10961		Has domain(s) with predicted DNA binding, DNA-binding transcription factor activity, RNA polymerase II-specific, zinc ion binding activity and role in regulation of transcription, DNA-templated, transcription, DNA-templated	Transcription factor
AN10970		RNA polymerase I transcription factor TFIIS, subunit A12.2; ortholog of S. cerevisiae Rpa12p; expression reduced after exposure to farnesol	Transcription factor
AN10976		Has domain(s) with predicted DNA binding, DNA-binding transcription factor activity, RNA polymerase II-specific, zinc ion binding activity and role in regulation of transcription, DNA-templated, transcription, DNA-templated	Transcription factor
AN10979		Has domain(s) with predicted DNA binding, DNA-binding transcription factor activity, RNA polymerase II-specific, zinc ion binding activity and role in regulation of transcription, DNA-templated, transcription, DNA-templated	Transcription factor
AN11003		Has domain(s) with predicted DNA binding, DNA-binding transcription factor activity, RNA polymerase II-specific, zinc ion binding activity and role in regulation of transcription, DNA-templated, transcription, DNA-templated	Transcription factor
AN11093		Has domain(s) with predicted DNA binding, DNA-binding transcription factor activity, DNA-binding transcription factor activity, RNA polymerase II-specific, zinc ion binding activity	Transcription factor	A/B	A/B			AA		AA
AN11099		Has domain(s) with predicted DNA-binding transcription factor activity, RNA polymerase II-specific, zinc ion binding activity, role in regulation of transcription, DNA-templated and nucleus localization	Transcription factor					A/B	A/B
AN11112		Has domain(s) with predicted DNA binding, DNA-binding transcription factor activity, RNA polymerase II-specific, nucleic acid binding, zinc ion binding activity	Transcription factor
AN11125		Ortholog(s) have glycine-tRNA ligase activity, role in DNA-templated transcription, termination, glycyl-tRNA aminoacylation, mitochondrial glycyl-tRNA aminoacylation and cytoplasm, mitochondrion localization	Transcription factor
AN11165		Has domain(s) with predicted DNA-binding transcription factor activity, RNA polymerase II-specific, zinc ion binding activity, role in regulation of transcription, DNA-templated and nucleus localization	Transcription factor
AN11169		Has domain(s) with predicted DNA binding, DNA-binding transcription factor activity, RNA polymerase II-specific, zinc ion binding activity and role in regulation of transcription, DNA-templated, transcription, DNA-templated	Transcription factor
AN11185		Has domain(s) with predicted DNA binding, DNA-binding transcription factor activity, DNA-binding transcription factor activity, RNA polymerase II-specific, zinc ion binding activity	Transcription factor					A-B	A-B	AA
AN11195		Has domain(s) with predicted DNA binding, DNA-binding transcription factor activity, RNA polymerase II-specific, nucleic acid binding, zinc ion binding activity	Transcription factor
AN11216		Has domain(s) with predicted DNA binding, DNA-binding transcription factor activity, DNA-binding transcription factor activity, RNA polymerase II-specific, zinc ion binding activity	Transcription factor
AN11222		Has domain(s) with predicted DNA-binding transcription factor activity, RNA polymerase II-specific, zinc ion binding activity, role in regulation of transcription, DNA-templated and nucleus localization	Transcription factor
AN11228		Has domain(s) with predicted DNA binding, DNA-binding transcription factor activity, RNA polymerase II-specific, zinc ion binding activity and role in regulation of transcription, DNA-templated, transcription, DNA-templated	Transcription factor
AN11753		Has domain(s) with predicted DNA-binding transcription factor activity, RNA polymerase II-specific, zinc ion binding activity, role in regulation of transcription, DNA-templated and nucleus localization	Transcription factor
AN11818		Has domain(s) with predicted DNA-binding transcription factor activity, RNA polymerase II-specific, zinc ion binding activity, role in regulation of transcription, DNA-templated and nucleus localization	Transcription factor					A/B	A/B
AN1183		Has domain(s) with predicted DNA binding, DNA-binding transcription factor activity, RNA polymerase II-specific, zinc ion binding activity and role in regulation of transcription, DNA-templated, transcription, DNA-templated	Transcription factor
AN11950		Has domain(s) with predicted DNA binding, DNA-binding transcription factor activity, RNA polymerase II-specific, zinc ion binding activity and role in regulation of transcription, DNA-templated, transcription, DNA-templated	Transcription factor
AN12120		Has domain(s) with predicted DNA-binding transcription factor activity, RNA polymerase II-specific, zinc ion binding activity, role in regulation of transcription, DNA-templated and nucleus localization	Transcription factor					AA		AA
AN12148		Has domain(s) with predicted DNA binding, DNA-binding transcription factor activity, RNA polymerase II-specific, zinc ion binding activity and role in regulation of transcription, DNA-templated, transcription, DNA-templated	Transcription factor
AN1217		Putative LIM/homeobox transcription factor; transcript upregulated in response to camptothecin	Transcription factor
AN1227		Ortholog(s) have RNA polymerase II activating transcription factor binding activity	Transcription factor
AN12442		Has domain(s) with predicted DNA binding, DNA-binding transcription factor activity, RNA polymerase II-specific, zinc ion binding activity and role in regulation of transcription, DNA-templated, transcription, DNA-templated	Transcription factor
AN13001		Has domain(s) with predicted DNA-binding transcription factor activity, RNA polymerase II-specific, zinc ion binding activity, role in regulation of transcription, DNA-templated and nucleus localization	Transcription factor
AN1353		Ortholog(s) have role in RNA polymerase II preinitiation complex assembly, transcription by RNA polymerase II and transcription factor TFIID complex localization	Transcription factor
AN1368		Has domain(s) with predicted DNA-binding transcription factor activity, RNA polymerase II-specific, zinc ion binding activity, role in regulation of transcription, DNA-templated and nucleus localization	Transcription factor
AN1406		Has domain(s) with predicted DNA binding, DNA-binding transcription factor activity, RNA polymerase II-specific, zinc ion binding activity and role in regulation of transcription, DNA-templated, transcription, DNA-templated	Transcription factor
AN1518		Ortholog(s) have DNA-binding transcription factor activity, RNA polymerase II-specific activity and role in cellular response to drug, positive regulation of transcription by RNA polymerase II	Transcription factor
AN1538		Ortholog(s) have RNA polymerase II complex binding activity	Transcription factor
AN1569		Has domain(s) with predicted DNA-binding transcription factor activity, RNA polymerase II-specific, zinc ion binding activity, role in regulation of transcription, DNA-templated and nucleus localization	Transcription factor
AN1678		Putative transcription factor; predicted role in secondary metabolite production	Transcription factor
AN1705		Has domain(s) with predicted DNA-binding transcription factor activity, RNA polymerase II-specific, nucleic acid binding, zinc ion binding activity, role in regulation of transcription, DNA-templated and nucleus localization	Transcription factor					AA
AN1736		Has domain(s) with predicted DNA-binding transcription factor activity, RNA polymerase II-specific, zinc ion binding activity, role in regulation of transcription, DNA-templated and nucleus localization	Transcription factor					AA		AA
AN1824		Has domain(s) with predicted DNA binding, DNA-binding transcription factor activity, RNA polymerase II-specific, zinc ion binding activity and role in regulation of transcription, DNA-templated, transcription, DNA-templated	Transcription factor					AA		AA
AN1829		Has domain(s) with predicted DNA-binding transcription factor activity, RNA polymerase II-specific, zinc ion binding activity, role in regulation of transcription, DNA-templated and nucleus localization	Transcription factor
AN1924		Has domain(s) with predicted DNA binding, DNA-binding transcription factor activity, copper ion binding activity, role in regulation of transcription, DNA-templated and host cell nucleus, nucleus localization	Transcription factor
AN1927		Putative zinc-cluster transcription factor; transcript upregulated by nitrate limitation	Transcription factor
AN1984		Ortholog(s) have TFIID-class transcription factor complex binding, chromatin binding, core promoter binding, lysine-acetylated histone binding, nucleosomal histone binding activity	Transcription factor
AN2001		Has domain(s) with predicted DNA-binding transcription factor activity, RNA polymerase II-specific, zinc ion binding activity, role in regulation of transcription, DNA-templated and nucleus localization	Transcription factor
AN2020		Has domain(s) with predicted DNA binding, DNA-binding transcription factor activity, sequence-specific DNA binding activity and role in regulation of transcription, DNA-templated	Transcription factor			AA
AN2025		Putative transcription factor; predicted role in secondary metabolite production	Transcription factor	AA				A-B	A-B
AN2026		Putative transcription factor; predicted role in secondary metabolite production	Transcription factor
AN2036		Putative transcription factor; predicted role in secondary metabolite production; predicted secondary metabolism gene cluster member	Transcription factor
AN2122		Has domain(s) with predicted DNA binding, DNA-binding transcription factor activity, RNA polymerase II-specific, zinc ion binding activity and role in regulation of transcription, DNA-templated, transcription, DNA-templated	Transcription factor
AN2136		Has domain(s) with predicted DNA-binding transcription factor activity, RNA polymerase II-specific, zinc ion binding activity, role in regulation of transcription, DNA-templated and nucleus localization	Transcription factor
AN2181		Ortholog(s) have TBP-class protein binding activity, role in RNA polymerase II preinitiation complex assembly, transcription initiation from RNA polymerase II promoter and transcription factor TFIIA complex localization	Transcription factor
AN2324		Has domain(s) with predicted DNA binding, DNA-binding transcription factor activity, DNA-binding transcription factor activity, RNA polymerase II-specific, zinc ion binding activity	Transcription factor					A/B	A/B	AA
AN2354		Has domain(s) with predicted DNA-binding transcription factor activity, RNA polymerase II-specific, zinc ion binding activity, role in regulation of transcription, DNA-templated and nucleus localization	Transcription factor
AN2367		Putative Zn(II)2Cys6 transcription factor; PalA-dependent expression independent of pH	Transcription factor					AA		AA
AN2375		Has domain(s) with predicted DNA-binding transcription factor activity, RNA polymerase II-specific, zinc ion binding activity, role in regulation of transcription, DNA-templated and nucleus localization	Transcription factor					AA		AA
AN2422		Has domain(s) with predicted DNA binding, DNA-binding transcription factor activity, RNA polymerase II-specific, zinc ion binding activity and role in regulation of transcription, DNA-templated, transcription, DNA-templated	Transcription factor
AN2553		Has domain(s) with predicted DNA binding, DNA-binding transcription factor activity, RNA polymerase II-specific, zinc ion binding activity and role in regulation of transcription, DNA-templated, transcription, DNA-templated	Transcription factor					AA		AA
AN2597		Has domain(s) with predicted DNA-binding transcription factor activity, RNA polymerase II-specific, zinc ion binding activity, role in regulation of transcription, DNA-templated and nucleus localization	Transcription factor
AN2615		Has domain(s) with predicted DNA-binding transcription factor activity, RNA polymerase II-specific, zinc ion binding activity, role in regulation of transcription, DNA-templated and nucleus localization	Transcription factor					A-B	A-B	A-B	A-B
AN2644		Has domain(s) with predicted DNA binding, DNA-binding transcription factor activity, RNA polymerase II-specific, zinc ion binding activity and role in regulation of transcription, DNA-templated, transcription, DNA-templated	Transcription factor
AN2650		Has domain(s) with predicted DNA binding, DNA-binding transcription factor activity, RNA polymerase II-specific, zinc ion binding activity and role in regulation of transcription, DNA-templated, transcription, DNA-templated	Transcription factor
AN2672		Has domain(s) with predicted DNA binding, DNA-binding transcription factor activity, RNA polymerase II-specific, zinc ion binding activity and role in regulation of transcription, DNA-templated, transcription, DNA-templated	Transcription factor					A-B	A-B	AB	AB
AN2677		Has domain(s) with predicted DNA binding, DNA-binding transcription factor activity, RNA polymerase II-specific, zinc ion binding activity and role in regulation of transcription, DNA-templated, transcription, DNA-templated	Transcription factor
AN2725		Has domain(s) with predicted DNA binding, DNA-binding transcription factor activity, RNA polymerase II-specific, zinc ion binding activity and role in regulation of transcription, DNA-templated, transcription, DNA-templated	Transcription factor					AA		AA
AN2780		Has domain(s) with predicted DNA binding, DNA-binding transcription factor activity, RNA polymerase II-specific, zinc ion binding activity and role in regulation of transcription, DNA-templated, transcription, DNA-templated	Transcription factor					A/B	A/B
AN2782		Has domain(s) with predicted DNA-binding transcription factor activity, DNA-binding transcription factor activity, RNA polymerase II-specific, zinc ion binding activity and role in regulation of transcription, DNA-templated	Transcription factor
AN2785		Has domain(s) with predicted DNA-binding transcription factor activity, RNA polymerase II-specific, zinc ion binding activity, role in regulation of transcription, DNA-templated and nucleus localization	Transcription factor
AN2839		Has domain(s) with predicted DNA binding, DNA-binding transcription factor activity, RNA polymerase II-specific, zinc ion binding activity and role in regulation of transcription, DNA-templated, transcription, DNA-templated	Transcription factor
AN3050		Has domain(s) with predicted DNA binding, DNA-binding transcription factor activity, RNA polymerase II-specific, zinc ion binding activity and role in regulation of transcription, DNA-templated, transcription, DNA-templated	Transcription factor
AN3108		Has domain(s) with predicted DNA-binding transcription factor activity, RNA polymerase II-specific, zinc ion binding activity, role in regulation of transcription, DNA-templated and nucleus localization	Transcription factor
AN3116		Ortholog(s) have RNA polymerase III general transcription initiation factor activity, RNA polymerase III type 3 promoter sequence-specific DNA binding activity and role in positive regulation of transcription by RNA polymerase III	Transcription factor
AN3120		Has domain(s) with predicted DNA binding, DNA-binding transcription factor activity, RNA polymerase II-specific, zinc ion binding activity and role in regulation of transcription, DNA-templated, transcription, DNA-templated	Transcription factor
AN3216		Has domain(s) with predicted DNA-binding transcription factor activity, sequence-specific DNA binding activity and role in regulation of transcription, DNA-templated	Transcription factor
AN3224		Ortholog(s) have RNA polymerase II complex recruiting activity, RNA polymerase II core promoter sequence-specific DNA binding, activating transcription factor binding, transcription coactivator activity	Transcription factor
AN3269		Has domain(s) with predicted DNA binding, DNA-binding transcription factor activity, RNA polymerase II-specific, zinc ion binding activity and role in regulation of transcription, DNA-templated, transcription, DNA-templated	Transcription factor
AN3280		Has domain(s) with predicted DNA-binding transcription factor activity, RNA polymerase II-specific, zinc ion binding activity, role in regulation of transcription, DNA-templated and nucleus localization	Transcription factor			AA
AN3300		Has domain(s) with predicted DNA-binding transcription factor activity, RNA polymerase II-specific, zinc ion binding activity, role in regulation of transcription, DNA-templated and nucleus localization	Transcription factor							AA
AN3356		Has domain(s) with predicted DNA binding, DNA-binding transcription factor activity, RNA polymerase II-specific, zinc ion binding activity and role in regulation of transcription, DNA-templated, transcription, DNA-templated	Transcription factor	AA
AN3385		Putative transcription factor; predicted role in secondary metabolite production	Transcription factor	A/B	A/B
AN3391		Putative transcription factor; predicted role in secondary metabolite production	Transcription factor
AN3433		Has domain(s) with predicted DNA-binding transcription factor activity, RNA polymerase II-specific, zinc ion binding activity, role in regulation of transcription, DNA-templated and nucleus localization	Transcription factor					A-B	A-B	A-B	A-B
AN3501		Putative transcription factor; predicted role in secondary metabolite production	Transcription factor
AN3502		Putative transcription factor; predicted role in secondary metabolite production	Transcription factor
AN3506		Putative transcription factor; predicted role in secondary metabolite production	Transcription factor					AA		AA
AN3637		Has domain(s) with predicted DNA binding, DNA-binding transcription factor activity, RNA polymerase II-specific, zinc ion binding activity and role in regulation of transcription, DNA-templated, transcription, DNA-templated	Transcription factor
AN3650		Has domain(s) with predicted DNA binding, DNA-binding transcription factor activity, RNA polymerase II-specific, zinc ion binding activity and role in regulation of transcription, DNA-templated, transcription, DNA-templated	Transcription factor
AN3684		Has domain(s) with predicted DNA binding, DNA-binding transcription factor activity, RNA polymerase II-specific, zinc ion binding activity and role in regulation of transcription, DNA-templated, transcription, DNA-templated	Transcription factor
AN3768		Has domain(s) with predicted DNA-binding transcription factor activity, RNA polymerase II-specific, zinc ion binding activity, role in regulation of transcription, DNA-templated and nucleus localization	Transcription factor					AA		AA
AN3769		Has domain(s) with predicted DNA binding, DNA-binding transcription factor activity, RNA polymerase II-specific, zinc ion binding activity and role in regulation of transcription, DNA-templated, transcription, DNA-templated	Transcription factor
AN3835		Has domain(s) with predicted DNA binding, DNA-binding transcription factor activity, RNA polymerase II-specific, zinc ion binding activity and role in regulation of transcription, DNA-templated, transcription, DNA-templated	Transcription factor
AN3863		Has domain(s) with predicted DNA binding, DNA-binding transcription factor activity, RNA polymerase II-specific, zinc ion binding activity and role in regulation of transcription, DNA-templated, transcription, DNA-templated	Transcription factor
AN3868		Has domain(s) with predicted DNA-binding transcription factor activity, DNA-binding transcription factor activity, RNA polymerase II-specific, zinc ion binding activity and role in regulation of transcription, DNA-templated	Transcription factor
AN3900		Has domain(s) with predicted DNA binding, DNA-binding transcription factor activity, RNA polymerase II-specific, zinc ion binding activity and role in regulation of transcription, DNA-templated, transcription, DNA-templated	Transcription factor
AN3907		Ortholog(s) have transcription factor TFIID complex localization	Transcription factor
AN3911		Putative transcription factor; predicted role in secondary metabolite production	Transcription factor
AN3986		Has domain(s) with predicted DNA-binding transcription factor activity, RNA polymerase II-specific, zinc ion binding activity, role in regulation of transcription, DNA-templated and nucleus localization	Transcription factor
AN4118		Ortholog(s) have DNA-binding transcription factor activity	Transcription factor
AN4123		Has domain(s) with predicted DNA-binding transcription factor activity, RNA polymerase II-specific, zinc ion binding activity, role in regulation of transcription, DNA-templated and nucleus localization	Transcription factor
AN4175		Has domain(s) with predicted DNA binding, DNA-binding transcription factor activity, RNA polymerase II-specific, zinc ion binding activity and role in regulation of transcription, DNA-templated, transcription, DNA-templated	Transcription factor
AN4185		Has domain(s) with predicted DNA binding, DNA-binding transcription factor activity, RNA polymerase II-specific, zinc ion binding activity and role in regulation of transcription, DNA-templated, transcription, DNA-templated	Transcription factor
AN4247		Has domain(s) with predicted DNA-binding transcription factor activity, RNA polymerase II-specific, zinc ion binding activity, role in regulation of transcription, DNA-templated and nucleus localization	Transcription factor
AN4324		Has domain(s) with predicted DNA-binding transcription factor activity, sequence-specific DNA binding activity and role in regulation of transcription, DNA-templated	Transcription factor
AN4343		Has domain(s) with predicted DNA binding, DNA-binding transcription factor activity, RNA polymerase II-specific, zinc ion binding activity and role in regulation of transcription, DNA-templated, transcription, DNA-templated	Transcription factor
AN4485		Has domain(s) with predicted DNA-binding transcription factor activity, RNA polymerase II-specific, zinc ion binding activity, role in regulation of transcription, DNA-templated and nucleus localization	Transcription factor
AN4489		Has domain(s) with predicted DNA binding, DNA-binding transcription factor activity, RNA polymerase II-specific, zinc ion binding activity and role in regulation of transcription, DNA-templated, transcription, DNA-templated	Transcription factor
AN4606		Has domain(s) with predicted DNA-binding transcription factor activity, RNA polymerase II-specific, zinc ion binding activity, role in regulation of transcription, DNA-templated and nucleus localization	Transcription factor
AN4626		Has domain(s) with predicted DNA-binding transcription factor activity, RNA polymerase II-specific, zinc ion binding activity, role in regulation of transcription, DNA-templated and nucleus localization	Transcription factor
AN4694		Ortholog(s) have methylated histone binding, transcription factor binding activity	Transcription factor
AN4744		Has domain(s) with predicted DNA binding, DNA-binding transcription factor activity, RNA polymerase II-specific, zinc ion binding activity and role in regulation of transcription, DNA-templated, transcription, DNA-templated	Transcription factor
AN4785		Ortholog(s) have DNA-binding transcription activator activity, RNA polymerase II-specific, DNA-binding transcription factor activity and RNA polymerase II-specific, more	Transcription factor
AN4837		Has domain(s) with predicted DNA binding, DNA-binding transcription factor activity, RNA polymerase II-specific, zinc ion binding activity and role in regulation of transcription, DNA-templated, transcription, DNA-templated	Transcription factor
AN4861		Ortholog(s) have RNA polymerase II complex binding, RNA polymerase II complex recruiting activity, RNA polymerase II regulatory region DNA binding activity	Transcription factor
AN4878		Putative transcription factor of unknown function; expression upregulated after exposure to farnesol	Transcription factor
AN4928		Ortholog(s) have RNA polymerase II general transcription initiation factor activity and role in RNA polymerase II preinitiation complex assembly, transcription initiation from RNA polymerase II promoter	Transcription factor
AN4949		Ortholog(s) have RNA polymerase III general transcription initiation factor activity, chromatin insulator sequence binding, tDNA binding activity and role in transcription initiation from RNA polymerase III promoter	Transcription factor
AN4972		Has domain(s) with predicted DNA binding, DNA-binding transcription factor activity, RNA polymerase II-specific, zinc ion binding activity and role in regulation of transcription, DNA-templated, transcription, DNA-templated	Transcription factor					AA
AN4985		Has domain(s) with predicted DNA-binding transcription factor activity, sequence-specific DNA binding activity and role in regulation of transcription, DNA-templated	Transcription factor
AN5048		Has domain(s) with predicted DNA binding, DNA-binding transcription factor activity, sequence-specific DNA binding activity and role in regulation of transcription, DNA-templated	Transcription factor
AN5052		Has domain(s) with predicted DNA binding, DNA-binding transcription factor activity, RNA polymerase II-specific, zinc ion binding activity and role in regulation of transcription, DNA-templated, transcription, DNA-templated	Transcription factor
AN5070		Has domain(s) with predicted DNA-binding transcription factor activity, RNA polymerase II-specific, zinc ion binding activity, role in regulation of transcription, DNA-templated and nucleus localization	Transcription factor
AN5259		Has domain(s) with predicted DNA-binding transcription factor activity, RNA polymerase II-specific, zinc ion binding activity, role in regulation of transcription, DNA-templated and nucleus localization	Transcription factor	AA				AA		AA
AN5279		Has domain(s) with predicted DNA-binding transcription factor activity, RNA polymerase II-specific, zinc ion binding activity, role in regulation of transcription, DNA-templated and nucleus localization	Transcription factor
AN5294		Has domain(s) with predicted DNA binding, DNA-binding transcription factor activity, RNA polymerase II-specific, zinc ion binding activity and role in regulation of transcription, DNA-templated, transcription, DNA-templated	Transcription factor
AN5299		Has domain(s) with predicted DNA binding, DNA-binding transcription factor activity, RNA polymerase II-specific, zinc ion binding activity and role in regulation of transcription, DNA-templated, transcription, DNA-templated	Transcription factor
AN5349		Has domain(s) with predicted DNA-binding transcription factor activity, RNA polymerase II-specific, zinc ion binding activity, role in regulation of transcription, DNA-templated and nucleus localization	Transcription factor
AN5390		Has domain(s) with predicted DNA-binding transcription factor activity, RNA polymerase II-specific, zinc ion binding activity, role in regulation of transcription, DNA-templated and nucleus localization	Transcription factor					AA		AA
AN5405		Putative bZIP-containing transcription factor; transcript is induced by nitrate	Transcription factor
AN5412		Has domain(s) with predicted DNA-binding transcription factor activity, RNA polymerase II-specific, zinc ion binding activity, role in regulation of transcription, DNA-templated and nucleus localization	Transcription factor
AN5431		Has domain(s) with predicted DNA binding, DNA-binding transcription factor activity, RNA polymerase II-specific, zinc ion binding activity and role in regulation of transcription, DNA-templated, transcription, DNA-templated	Transcription factor
AN5498		Ortholog(s) have transcription factor TFIIE complex localization	Transcription factor
AN5533		Has domain(s) with predicted DNA-binding transcription factor activity, RNA polymerase II-specific, zinc ion binding activity, role in regulation of transcription, DNA-templated and nucleus localization	Transcription factor
AN5555		Has domain(s) with predicted DNA-binding transcription factor activity, RNA polymerase II-specific, zinc ion binding activity, role in regulation of transcription, DNA-templated and nucleus localization	Transcription factor
AN5609		Has domain(s) with predicted DNA-binding transcription factor activity, DNA-binding transcription factor activity, RNA polymerase II-specific, zinc ion binding activity and role in regulation of transcription, DNA-templated	Transcription factor
AN5752		Ortholog(s) have RNA polymerase II core promoter sequence-specific DNA binding, RNA polymerase II transcription regulator recruiting activity	Transcription factor
AN5775		Predicted sequence-specific DNA binding transcription factor; upregulated in A. oryzae and A. nidulans under hypoxic growth conditions	Transcription factor
AN5849		Has domain(s) with predicted DNA-binding transcription factor activity, RNA polymerase II-specific, zinc ion binding activity, role in regulation of transcription, DNA-templated and nucleus localization	Transcription factor
AN5859		Has domain(s) with predicted DNA binding, DNA-binding transcription factor activity, RNA polymerase II-specific, zinc ion binding activity and role in regulation of transcription, DNA-templated, transcription, DNA-templated	Transcription factor
AN5870		Has domain(s) with predicted DNA-binding transcription factor activity, RNA polymerase II-specific, zinc ion binding activity, role in regulation of transcription, DNA-templated and nucleus localization	Transcription factor
AN5894		Ortholog(s) have RNA polymerase II C-terminal domain phosphoserine binding, RNA polymerase II complex binding, chromatin binding activity	Transcription factor
AN5910		Ortholog(s) have RNA polymerase II C-terminal domain phosphoserine binding, RNA polymerase II complex binding, chromatin binding activity	Transcription factor
AN5924		Has domain(s) with predicted DNA-binding transcription factor activity, RNA polymerase II-specific, zinc ion binding activity, role in regulation of transcription, DNA-templated and nucleus localization	Transcription factor
AN5955		Has domain(s) with predicted DNA binding, DNA-binding transcription factor activity, RNA polymerase II-specific, zinc ion binding activity and role in regulation of transcription, DNA-templated, transcription, DNA-templated	Transcription factor
AN6030		Has domain(s) with predicted DNA binding, DNA-binding transcription factor activity, RNA polymerase II-specific, zinc ion binding activity and role in regulation of transcription, DNA-templated, transcription, DNA-templated	Transcription factor
AN6062		Has domain(s) with predicted DNA-binding transcription factor activity, RNA polymerase II-specific, zinc ion binding activity, role in regulation of transcription, DNA-templated and nucleus localization	Transcription factor
AN6091		Has domain(s) with predicted DNA binding, DNA-binding transcription factor activity, RNA polymerase II-specific, zinc ion binding activity and role in regulation of transcription, DNA-templated, transcription, DNA-templated	Transcription factor
AN6166		Ortholog(s) have transcription factor TFIIE complex localization	Transcription factor
AN6218		Has domain(s) with predicted DNA-binding transcription factor activity, RNA polymerase II-specific, zinc ion binding activity, role in regulation of transcription, DNA-templated and nucleus localization	Transcription factor
AN6223		Ortholog(s) have RNA polymerase II repressing transcription factor binding, transcription coactivator activity, transcription corepressor activity	Transcription factor
AN6322		Has domain(s) with predicted DNA-binding transcription factor activity, RNA polymerase II-specific, zinc ion binding activity, role in regulation of transcription, DNA-templated and nucleus localization	Transcription factor
AN6392		Has domain(s) with predicted DNA-binding transcription factor activity, RNA polymerase II-specific, zinc ion binding activity, role in regulation of transcription, DNA-templated and nucleus localization	Transcription factor
AN6396		Has domain(s) with predicted DNA binding, DNA-binding transcription factor activity, RNA polymerase II-specific, zinc ion binding activity and role in regulation of transcription, DNA-templated, transcription, DNA-templated	Transcription factor					A-B	A-B	A/B	A/B
AN6430		Putative transcription factor; predicted role in secondary metabolite production	Transcription factor
AN6667		Has domain(s) with predicted DNA binding, DNA-binding transcription factor activity, RNA polymerase II-specific, zinc ion binding activity and role in regulation of transcription, DNA-templated, transcription, DNA-templated	Transcription factor
AN6684		Has domain(s) with predicted DNA-binding transcription factor activity, RNA polymerase II-specific, zinc ion binding activity, role in regulation of transcription, DNA-templated and nucleus localization	Transcription factor
AN6715		Has domain(s) with predicted DNA binding, DNA-binding transcription factor activity and role in regulation of transcription, DNA-templated	Transcription factor
AN6747		Has domain(s) with predicted DNA binding, DNA-binding transcription factor activity, RNA polymerase II-specific, zinc ion binding activity and role in regulation of transcription, DNA-templated, transcription, DNA-templated	Transcription factor					A/B	A/B
AN6762		Has domain(s) with predicted DNA binding, DNA-binding transcription factor activity, RNA polymerase II-specific, zinc ion binding activity and role in regulation of transcription, DNA-templated, transcription, DNA-templated	Transcription factor
AN6788		Putative transcription factor; predicted role in secondary metabolite production	Transcription factor
AN6790		Putative transcription factor; predicted role in secondary metabolite production	Transcription factor
AN6828		Has domain(s) with predicted DNA-binding transcription factor activity, sequence-specific DNA binding, zinc ion binding activity and role in regulation of transcription, DNA-templated	Transcription factor
AN6832		Has domain(s) with predicted DNA binding, DNA-binding transcription factor activity, RNA polymerase II-specific, zinc ion binding activity and role in regulation of transcription, DNA-templated, transcription, DNA-templated	Transcription factor
AN6837		Has domain(s) with predicted DNA-binding transcription factor activity, RNA polymerase II-specific, zinc ion binding activity, role in regulation of transcription, DNA-templated and nucleus localization	Transcription factor
AN6846		Has domain(s) with predicted DNA-binding transcription factor activity, RNA polymerase II-specific, zinc ion binding activity, role in regulation of transcription, DNA-templated and nucleus localization	Transcription factor
AN6858		Has domain(s) with predicted DNA-binding transcription factor activity, RNA polymerase II-specific, zinc ion binding activity, role in regulation of transcription, DNA-templated and nucleus localization	Transcription factor					A/B	A/B
AN6884		Has domain(s) with predicted DNA-binding transcription factor activity, RNA polymerase II-specific, zinc ion binding activity, role in regulation of transcription, DNA-templated and nucleus localization	Transcription factor
AN6889		Ortholog(s) have DNA-binding transcription factor activity, RNA polymerase II-specific activity, role in aromatic amino acid family catabolic process, positive regulation of transcription by RNA polymerase II and nucleus localization	Transcription factor
AN7012		Has domain(s) with predicted DNA binding, DNA-binding transcription factor activity, sequence-specific DNA binding activity and role in regulation of transcription, DNA-templated	Transcription factor
AN7061		Putative transcription factor; predicted role in secondary metabolite production	Transcription factor					A/B	A/B
AN7073		Putative transcription factor; predicted role in secondary metabolite production; predicted secondary metabolism gene cluster member; coregulated with the PKS pkgA/AN7071	Transcription factor
AN7118		Has domain(s) with predicted DNA binding, DNA-binding transcription factor activity, RNA polymerase II-specific, nucleic acid binding, zinc ion binding activity	Transcription factor					A/B	A/B
AN7189		Ortholog(s) have DNA-binding transcription factor activity	Transcription factor
AN7190		Has domain(s) with predicted DNA-binding transcription factor activity, RNA polymerase II-specific, zinc ion binding activity, role in regulation of transcription, DNA-templated and nucleus localization	Transcription factor
AN7223		Has domain(s) with predicted DNA-binding transcription factor activity, DNA-binding transcription factor activity, RNA polymerase II-specific, zinc ion binding activity and role in regulation of transcription, DNA-templated	Transcription factor
AN7332		Has domain(s) with predicted DNA binding, DNA-binding transcription factor activity, RNA polymerase II-specific, zinc ion binding activity and role in regulation of transcription, DNA-templated, transcription, DNA-templated	Transcription factor
AN7342		Ortholog(s) have RNA polymerase III general transcription initiation factor activity, chromatin insulator sequence binding activity and role in transcription initiation from RNA polymerase III promoter	Transcription factor
AN7343		Putative Zn(II)2Cys6-domain containing transcription factor; transcript is induced by nitrate	Transcription factor
AN7376		Has domain(s) with predicted DNA-binding transcription factor activity, RNA polymerase II-specific, zinc ion binding activity, role in regulation of transcription, DNA-templated and nucleus localization	Transcription factor
AN7507		Has domain(s) with predicted DNA binding, DNA-binding transcription factor activity, RNA polymerase II-specific, zinc ion binding activity and role in regulation of transcription, DNA-templated, transcription, DNA-templated	Transcription factor					AA
AN7508		Has domain(s) with predicted DNA binding, DNA-binding transcription factor activity, RNA polymerase II-specific, zinc ion binding activity and role in regulation of transcription, DNA-templated, transcription, DNA-templated	Transcription factor
AN7559		Has domain(s) with predicted role in transcription initiation from RNA polymerase II promoter and transcription factor TFIID complex localization	Transcription factor
AN7592		Has domain(s) with predicted DNA-binding transcription factor activity, DNA-binding transcription factor activity, RNA polymerase II-specific, zinc ion binding activity and role in regulation of transcription, DNA-templated	Transcription factor	AA
AN7596		Has domain(s) with predicted DNA-binding transcription factor activity, RNA polymerase II-specific, zinc ion binding activity, role in regulation of transcription, DNA-templated and nucleus localization	Transcription factor					AA		AA
AN7776		Has domain(s) with predicted DNA-binding transcription factor activity, RNA polymerase II-specific, zinc ion binding activity, role in regulation of transcription, DNA-templated and nucleus localization	Transcription factor					AA
AN7867		Has domain(s) with predicted DNA-binding transcription factor activity, RNA polymerase II-specific, zinc ion binding activity, role in regulation of transcription, DNA-templated and nucleus localization	Transcription factor
AN7872		Predicted transcription factor; predicted secondary metabolism gene cluster member	Transcription factor
AN7919		Has domain(s) with predicted DNA binding, DNA-binding transcription factor activity, RNA polymerase II-specific, zinc ion binding activity and role in regulation of transcription, DNA-templated, transcription, DNA-templated	Transcription factor					AA
AN7921		Has domain(s) with predicted DNA binding, DNA-binding transcription factor activity, RNA polymerase II-specific, zinc ion binding activity and role in regulation of transcription, DNA-templated, transcription, DNA-templated	Transcription factor
AN7923		Has domain(s) with predicted DNA-binding transcription factor activity, RNA polymerase II-specific, zinc ion binding activity, role in regulation of transcription, DNA-templated and nucleus localization	Transcription factor
AN7942		Has domain(s) with predicted DNA-binding transcription factor activity, RNA polymerase II-specific, zinc ion binding activity, role in regulation of transcription, DNA-templated and nucleus localization	Transcription factor
AN7951		Has domain(s) with predicted DNA binding, DNA-binding transcription factor activity, RNA polymerase II-specific, zinc ion binding activity and role in regulation of transcription, DNA-templated, transcription, DNA-templated	Transcription factor
AN7997		Ortholog(s) have RNA polymerase III general transcription initiation factor activity, chromatin insulator sequence binding activity and role in transcription initiation from RNA polymerase III promoter	Transcription factor
AN8079		Has domain(s) with predicted DNA binding, DNA-binding transcription factor activity, RNA polymerase II-specific, protein kinase regulator activity, zinc ion binding activity	Transcription factor
AN8103		Putative transcription factor; predicted role in secondary metabolite production	Transcription factor
AN8111		Putative Zn(II)2Cys6 transcription factor; predicted role in secondary metabolite production; predicted secondary metabolism gene cluster member	Transcription factor
AN8125		Has domain(s) with predicted DNA binding, DNA-binding transcription factor activity, RNA polymerase II-specific, zinc ion binding activity and role in regulation of transcription, DNA-templated, transcription, DNA-templated	Transcription factor					AA		AA
AN8161		Has domain(s) with predicted DNA binding, DNA-binding transcription factor activity, RNA polymerase II-specific, zinc ion binding activity and role in regulation of transcription, DNA-templated, transcription, DNA-templated	Transcription factor
AN8164		Has domain(s) with predicted DNA binding, DNA-binding transcription factor activity, RNA polymerase II-specific, zinc ion binding activity and role in regulation of transcription, DNA-templated, transcription, DNA-templated	Transcription factor
AN8177		Putative glucose responsive transcription factor	Transcription factor					AA		AA
AN8298		Has domain(s) with predicted DNA binding, DNA-binding transcription factor activity, RNA polymerase II-specific, zinc ion binding activity and role in regulation of transcription, DNA-templated, transcription, DNA-templated	Transcription factor
AN8345		Has domain(s) with predicted DNA-binding transcription factor activity, RNA polymerase II-specific, zinc ion binding activity, role in regulation of transcription, DNA-templated and nucleus localization	Transcription factor
AN8355		Has domain(s) with predicted DNA binding, DNA-binding transcription factor activity, RNA polymerase II-specific, zinc ion binding activity and role in regulation of transcription, DNA-templated, transcription, DNA-templated	Transcription factor					A/B	A/B
AN8357		Has domain(s) with predicted DNA binding, DNA-binding transcription factor activity, RNA polymerase II-specific, nucleic acid binding, zinc ion binding activity	Transcription factor					A-B	A-B	AA
AN8391		Has domain(s) with predicted DNA-binding transcription factor activity, RNA polymerase II-specific, zinc ion binding activity, role in regulation of transcription, DNA-templated and nucleus localization	Transcription factor
AN8426		Has domain(s) with predicted DNA binding, DNA-binding transcription factor activity, RNA polymerase II-specific, zinc ion binding activity and role in regulation of transcription, DNA-templated, transcription, DNA-templated	Transcription factor
AN8431		Has domain(s) with predicted DNA-binding transcription factor activity, RNA polymerase II-specific, zinc ion binding activity, role in regulation of transcription, DNA-templated and nucleus localization	Transcription factor
AN8441		Has domain(s) with predicted DNA binding, DNA-binding transcription factor activity, RNA polymerase II-specific, zinc ion binding activity and role in regulation of transcription, DNA-templated, transcription, DNA-templated	Transcription factor	AA
AN8447		Has domain(s) with predicted DNA binding, DNA-binding transcription factor activity, RNA polymerase II-specific, zinc ion binding activity and role in regulation of transcription, DNA-templated, transcription, DNA-templated	Transcription factor
AN8460		Has domain(s) with predicted DNA binding, DNA-binding transcription factor activity, RNA polymerase II-specific, zinc ion binding activity and role in regulation of transcription, DNA-templated, transcription, DNA-templated	Transcription factor
AN8469		Has domain(s) with predicted DNA-binding transcription factor activity, RNA polymerase II-specific, zinc ion binding activity, role in regulation of transcription, DNA-templated and nucleus localization	Transcription factor					A-B	A-B	AA
AN8473		Has domain(s) with predicted DNA binding, DNA-binding transcription factor activity, RNA polymerase II-specific, zinc ion binding activity and role in regulation of transcription, DNA-templated, transcription, DNA-templated	Transcription factor					A-B	A-B	AA
AN8506		Putative transcription factor; predicted role in secondary metabolite production	Transcription factor
AN8509		Putative transcription factor; predicted role in secondary metabolite production	Transcription factor
AN8529		Has domain(s) with predicted DNA-binding transcription factor activity, RNA polymerase II-specific, zinc ion binding activity, role in regulation of transcription, DNA-templated and nucleus localization	Transcription factor
AN8535		Has domain(s) with predicted DNA binding, DNA-binding transcription factor activity, RNA polymerase II-specific, zinc ion binding activity and role in regulation of transcription, DNA-templated, transcription, DNA-templated	Transcription factor
AN8590		Has domain(s) with predicted DNA binding, DNA-binding transcription factor activity, RNA polymerase II-specific, zinc ion binding activity and role in regulation of transcription, DNA-templated, transcription, DNA-templated	Transcription factor
AN8636		Has domain(s) with predicted DNA binding, DNA-binding transcription factor activity, RNA polymerase II-specific, zinc ion binding activity and role in regulation of transcription, DNA-templated, transcription, DNA-templated	Transcription factor	AB	AB			A-B	A-B	AA
AN8655		Has domain(s) with predicted DNA binding, DNA-binding transcription factor activity, RNA polymerase II-specific, zinc ion binding activity and role in regulation of transcription, DNA-templated, transcription, DNA-templated	Transcription factor
AN8666		Has domain(s) with predicted DNA-binding transcription factor activity, RNA polymerase II-specific, zinc ion binding activity, role in regulation of transcription, DNA-templated and nucleus localization	Transcription factor
AN8694		Has domain(s) with predicted DNA-binding transcription factor activity, RNA polymerase II-specific, zinc ion binding activity, role in regulation of transcription, DNA-templated and nucleus localization	Transcription factor
AN8732		Has domain(s) with predicted DNA binding, DNA-binding transcription factor activity, RNA polymerase II-specific, zinc ion binding activity and role in regulation of transcription, DNA-templated, transcription, DNA-templated	Transcription factor
AN8735		Has domain(s) with predicted DNA binding, DNA-binding transcription factor activity, RNA polymerase II-specific, nucleic acid binding, zinc ion binding activity	Transcription factor
AN8778		Has domain(s) with predicted DNA-binding transcription factor activity, RNA polymerase II-specific, zinc ion binding activity, role in regulation of transcription, DNA-templated and nucleus localization	Transcription factor
AN8885		Has domain(s) with predicted DNA binding, DNA-binding transcription factor activity, RNA polymerase II-specific, zinc ion binding activity and role in regulation of transcription, DNA-templated, transcription, DNA-templated	Transcription factor
AN8894		Has domain(s) with predicted DNA binding, DNA-binding transcription factor activity, RNA polymerase II-specific, zinc ion binding activity and role in regulation of transcription, DNA-templated, transcription, DNA-templated	Transcription factor
AN8916		Putative transcription factor; predicted role in secondary metabolite production	Transcription factor
AN8918		Putative transcription factor; predicted role in secondary metabolite production	Transcription factor					AA		AA
AN8930		Has domain(s) with predicted DNA binding, DNA-binding transcription factor activity, RNA polymerase II-specific, zinc ion binding activity and role in regulation of transcription, DNA-templated, transcription, DNA-templated	Transcription factor	A-B	A-B	AA		AA		AA
AN8938		Has domain(s) with predicted DNA-binding transcription factor activity, RNA polymerase II-specific, zinc ion binding activity, role in regulation of transcription, DNA-templated and nucleus localization	Transcription factor
AN8949		Has domain(s) with predicted DNA-binding transcription factor activity, sequence-specific DNA binding activity and role in regulation of transcription, DNA-templated	Transcription factor
AN8973		Has domain(s) with predicted DNA-binding transcription factor activity, DNA-binding transcription factor activity, RNA polymerase II-specific, zinc ion binding activity and role in regulation of transcription, DNA-templated	Transcription factor					AA		AA
AN9013		Has domain(s) with predicted DNA-binding transcription factor activity, RNA polymerase II-specific, zinc ion binding activity, role in regulation of transcription, DNA-templated and nucleus localization	Transcription factor
AN9025		Has domain(s) with predicted DNA binding, DNA-binding transcription factor activity, RNA polymerase II-specific, nucleic acid binding, zinc ion binding activity	Transcription factor					A-B	A-B
AN9026		Has domain(s) with predicted DNA binding, DNA-binding transcription factor activity, RNA polymerase II-specific, zinc ion binding activity and role in regulation of transcription, DNA-templated, transcription, DNA-templated	Transcription factor					AA
AN9043		Has domain(s) with predicted DNA binding, DNA-binding transcription factor activity, RNA polymerase II-specific, zinc ion binding activity and role in regulation of transcription, DNA-templated, transcription, DNA-templated	Transcription factor
AN9047		Has domain(s) with predicted DNA binding, DNA-binding transcription factor activity, RNA polymerase II-specific, zinc ion binding activity and role in regulation of transcription, DNA-templated, transcription, DNA-templated	Transcription factor					AA		AA
AN9050		Zn(2)-Cys(6) binuclear domain-containing protein; predicted sequence-specific DNA binding transcription factor activity, zinc ion binding activity and a role in regulation of transcription; NeddH-associated protein	Transcription factor					A/B	A/B
AN9096		Has domain(s) with predicted DNA-binding transcription factor activity, RNA polymerase II-specific, zinc ion binding activity, role in regulation of transcription, DNA-templated and nucleus localization	Transcription factor
AN9141		Has domain(s) with predicted DNA-binding transcription factor activity, RNA polymerase II-specific, zinc ion binding activity, role in regulation of transcription, DNA-templated and nucleus localization	Transcription factor
AN9221		Putative transcription factor; predicted role in secondary metabolite production	Transcription factor
AN9236		Putative transcription factor; predicted role in secondary metabolite production	Transcription factor
AN9240		Putative C2H2 transcription factor; transcript repressed by light in developmentally competent mycelia	Transcription factor
AN9293		Has domain(s) with predicted DNA-binding transcription factor activity, RNA polymerase II-specific, zinc ion binding activity, role in regulation of transcription, DNA-templated and nucleus localization	Transcription factor
AN9328		Has domain(s) with predicted DNA binding, DNA-binding transcription factor activity, sequence-specific DNA binding, zinc ion binding activity and role in regulation of transcription, DNA-templated	Transcription factor
AN9373		Has domain(s) with predicted DNA-binding transcription factor activity, RNA polymerase II-specific, zinc ion binding activity, role in regulation of transcription, DNA-templated and nucleus localization	Transcription factor			A-B	A-B
AN9395		Has domain(s) with predicted DNA binding, DNA-binding transcription factor activity, RNA polymerase II-specific, zinc ion binding activity and role in regulation of transcription, DNA-templated, transcription, DNA-templated	Transcription factor
AN9458		Has domain(s) with predicted DNA binding, DNA-binding transcription factor activity, RNA polymerase II-specific, zinc ion binding activity and role in regulation of transcription, DNA-templated, transcription, DNA-templated	Transcription factor
AN9516		Has domain(s) with predicted DNA binding, DNA-binding transcription factor activity, RNA polymerase II-specific, zinc ion binding activity and role in regulation of transcription, DNA-templated, transcription, DNA-templated	Transcription factor
AN2911	atfA	Basic-region leucine zipper transcription factor; plays a role in the response of conidia to stress; expression upregulated after exposure to farnesol	Transcription factor
AN8643	atfB	Ortholog(s) have role in cellular response to heat, cellular response to hydrogen peroxide	Transcription factor
			Number of AtfA or AtfB dependent genes in the group:	9	4	7	1	54	23	37	4
			Number of genes in the group:	372	372	372	372	372	372	372	372
			Number of AtfA or AtfB depenent genes:	329	96	240	9	1496	439	1143	155
			Totel number of genes:	10775	10775	10775	10775	10775	10775	10775	10775
			p-value (Fisher's exact test):	0.8072	0.4243	0.7277	0.2712	0.3828	0.03053	0.6885	0.7879

## Sheet: TCA cycle, respiration
Table S6 Characterization of AtfA- and AtfB-dependent genes by their known or putative functions.
Sheet 4 - TCA cycle and respiration genes
a - According to Aspergillus Genome Database (http://www.aspgd.org/).
b - According to the reference(s) mentioned at the definition of the appropriate gene group in the Materials and methods chapter of the manuscript.
GENE ID	Gene namea	Description (AspGD)a	Groupb	Descriptionb	AtfA-dependent in untreated mycelial samples	AtfB-dependent in untreated mycelial samples	AtfA-dependent in MSB-treated mycelial samples	AtfB-dependent in MSB-treated mycelial samples	AtfA-dependent in untreated conidial samples	AtfB-dependent in untreated conidial samples	AtfA-dependent in MSB-treated conidial samples	AtfB-dependent in MSB-treated conidial samples
AN5162	pdhB	Putative pyruvate dehydrogenase (lipoamide) with a predicted role in pyruvate metabolism	TCA cycle	Pyruvate dehydrogenase complex
AN9403	pdhC	Putative pyruvate dehydrogenase (lipoamide) with a predicted role in pyruvate metabolism	TCA cycle	Pyruvate dehydrogenase complex
AN6708	pdhA	Putative dihydrolipoamide S-acetyltransferase with a predicted role in pyruvate metabolism	TCA cycle	Pyruvate dehydrogenase complex
AN2964	pdhX	Putative pyruvate dehydrogenase complex component	TCA cycle	Pyruvate dehydrogenase complex
AN8275	citA	Mitochondrial citrate synthase with a predicted role in the TCA cycle	TCA cycle	Citrate synthase					AA		AA
AN10973		Putative citrate synthase	TCA cycle	Citrate synthase
AN5300		Putative aconitate hydratase with a predicted role in the TCA cycle	TCA cycle	Aconitase
AN3894		Putative aconitate hydratase with a predicted role in the TCA cycle	TCA cycle	Aconitase
AN5525	acoA	Putative aconitate hydratase with a predicted role in the TCA cycle; intracellular; protein abundance decreased by menadione stress; protein expressed at increased levels in a hapX mutant versus wild-type	TCA cycle	Aconitase					AA		AA
AN5790		Putative isocitrate dehydrogenase (NAD+) with a predicted role in the TCA cycle	TCA cycle	Isocitrate dehydrogenase (NAD+)
AN1003		Putative isocitrate dehydrogenase (NAD+) with a predicted role in the TCA cycle; intracellular, menadione stress-induced protein	TCA cycle	Isocitrate dehydrogenase (NAD+)
AN2999	idpA	Putative isocitrate dehydrogenase (NADP+) with a predicted role in the TCA cycle; regulated by carbon source; alternative transcription start sites specify mitochondrial or cytoplasmic and peroxisomal protein localization	TCA cycle	Isocitrate dehydrogenase (NADP+)							AA
AN3466	kgdB	Putative dihydrolipoamide S-succinyl transferase with a predicted role in the TCA cycle	TCA cycle	a-ketoglutarate dehydrogenase
AN5571	kgdA	Putative oxoglutarate dehydrogenase (lipoamide) with a predicted role in the TCA cycle	TCA cycle	a-ketoglutarate dehydrogenase					AA		AA
AN7000		Putative succinate-CoA ligase (ADP-forming) with a predicted role in the TCA cycle	TCA cycle	Succinate-CoA ligase
AN2295		Putative succinate-CoA ligase (GDP-forming) with a predicted role in the TCA cycle	TCA cycle	Succinate-CoA ligase
AN1193		Putative succinate-CoA ligase (GDP-forming), alpha chain	TCA cycle	Succinate-CoA ligase
AN2916		Putative succinate dehydrogenase with a predicted role in the TCA cycle	TCA cycle	Succinate dehydrogenase
AN8793	carC	Putative succinate dehydrogenase (ubiquinone) with a predicted role in the TCA cycle; palA-dependent expression independent of pH	TCA cycle	Succinate dehydrogenase							AA
AN2332		Putative succinate dehydrogenase with a predicted role in the TCA cycle	TCA cycle	Succinate dehydrogenase							AA
AN0896		Putative succinate dehydrogenase	TCA cycle	Succinate dehydrogenase
AN1543		Putative succinate dehydrogenase	TCA cycle	Succinate dehydrogenase
AN6133		Putative succinate dehydrogenase	TCA cycle	Succinate dehydrogenase
AN8707		Putative fumarate dehydratase with a predicted role in the TCA cycle	TCA cycle	Fumarate hydratase
AN5718		Putative fumarate hydratase	TCA cycle	Fumarate hydratase					AA		AA
AN6499	mdhC	Putative malate dehydrogenase with a predicted role in the methylglyoxal bypass or the TCA cycle; intracellular; protein abundance decreased by menadione stress	TCA cycle	Malate dehydrogenase
AN6717	mdhA	Putative mitochondrial malate dehydrogenase with a predicted role in the TCA cycle; intracellular; protein abundance decreased by menadione stress	TCA cycle	Malate dehydrogenase
AN7633		Putative malate dehydrogenase	TCA cycle	Malate dehydrogenase
AN9053		Putative malate dehydrogenase	TCA cycle	Malate dehydrogenase					AA		AA
AN5031	mdhB	Putative malate dehydrogenase with a predicted role in the methylglyoxal bypass or the TCA cycle	TCA cycle	Malate dehydrogenase
AN2436	aclB	Putative ATP citrate synthase with a predicted role in TCA intermediate metabolism; transcript downregulated upon shift from glucose to ethanol and after exposure to farnesol	TCA cycle	ATP-citrate synthase
AN2435	aclA	Putative ATP citrate synthase with a predicted role in TCA intermediate metabolism; transcript downregulated upon shift from glucose to ethanol and after exposure to farnesol; protein induced by farnesol	TCA cycle	ATP-citrate synthase
AN3577		Putative citrate lyase	TCA cycle	Citrate lyase
AN4462	pycA	Putative pyruvate carboxylase or glutathione synthase	TCA cycle	Pyruvate carboxylase
AN11009		Putative mitochondrial pyruvate carboxylase	TCA cycle	Pyruvate carboxylase							AA
				Number of AtfA or AtfB dependent genes in the group:	0	0	0	0	5	0	9	0
				Number of genes in the group:	35	35	35	35	35	35	35	35
				Number of AtfA or AtfB depenent genes:	329	96	240	9	1496	439	1143	155
				Totel number of genes:	10775	10775	10775	10775	10775	10775	10775	10775
				p-value (Fisher's exact test):	1	1	1	1	0.5464	1	0.009103	1
GENE ID	Gene name	Description (AspGD)	Group	Description	AtfA-dependent in untreated mycelial samples	AtfB-dependent in untreated mycelial samples	AtfA-dependent in MSB-treated mycelial samples	AtfB-dependent in MSB-treated mycelial samples	AtfA-dependent in untreated conidial samples	AtfB-dependent in untreated conidial samples	AtfA-dependent in MSB-treated conidial samples	AtfB-dependent in MSB-treated conidial samples
AN0357		Putative ubiquinol-cytochrome-c reductase subunit with a predicted role in energy metabolism	Respration
AN10585		Ortholog(s) have cytochrome-c oxidase activity, enzyme regulator activity, role in aerobic respiration, mitochondrial respirasome assembly and mitochondrial respiratory chain complex IV, mitochondrion, plasma membrane localization	Respration
AN11347		Ortholog(s) have cytochrome-c oxidase activity, role in mitochondrial electron transport, cytochrome c to oxygen and mitochondrial respiratory chain complex IV, plasma membrane localization	Respration
AN12213		Ortholog(s) have ubiquinol-cytochrome-c reductase activity and role in aerobic respiration, mitochondrial electron transport, ubiquinol to cytochrome c	Respration
AN20000	ndhDL	Mitochondrially encoded subunit 4L of NADH dehydrogenase	Respration
AN20001	ndhE	Mitochondrially-encoded subunit 5 of NADH dehydrogenase	Respration								AA
AN20002	ndhB	Mitochondrially encoded subunit 2 of NADH dehydrogenase; note that the sequence represented in AspGD is N-terminally truncated relative to orthologous genes in other species	Respration								AA
AN20005	cobA	Cytochrome b, mitochondrially encoded subunit of the ubiquinol-cytochrome c reductase complex	Respration
AN20007	ndhA	Mitochondrially encoded subunit 1 of NADH dehydrogenase	Respration								AA
AN20008	ndhD	Mitochondrially encoded subunit 4 of NADH dehydrogenase; sequence in AspGD is truncated at the 3' end	Respration								AA
AN20011	ndhF	Mitochondrially encoded subunit 6 of NADH dehydrogenase	Respration
AN20012	oxiC	Subunit III of cytochrome c oxidase, which is the terminal member of the mitochondrial inner membrane electron transport chain; one of three mitochondrially-encoded subunits	Respration								AA
AN20014	oxiA	Subunit I of cytochrome c oxidase, which is the terminal member of the mitochondrial inner membrane electron transport chain; one of three mitochondrially-encoded subunits; 2nd and 3rd introns contain maturase-related open reading frames	Respration								AA
AN20018	ndhC	Mitochondrially encoded subunit 3 of NADH dehydrogenase	Respration
AN20019	oxiB	Subunit II of cytochrome c oxidase, which is the terminal member of the mitochondrial inner membrane electron transport chain; one of three mitochondrially-encoded subunits	Respration
AN2099		Putative alternative oxidase	Respration							BB
AN2306		Putative ubiquinol-cytochrome-c reductase subunit with a predicted role in energy metabolism; intracellular, menadione stress-induced protein	Respration
AN2316		Putative cytochrome c oxidase subunit with a predicted role in energy metabolism	Respration
AN4388		Putative ubiquinol-cytochrome-c reductase subunit with a predicted role in energy metabolism	Respration
AN4525		Putative cytochrome c oxidase subunit with a predicted role in energy metabolism	Respration
AN5629		Putative NADH dehydrogenase (ubiquinone) with a predicted role in energy metabolism	Respration
AN5971		Putative NADH-ubiquinone oxidoreductase	Respration
AN6246	cycA	Cytochrome C	Respration						AA		AA
AN8118		Putative cytochrome c oxidase subunit with a predicted role in energy metabolism	Respration
AN4755		Ortholog(s) have role in aerobic respiration, development of symbiont in host and mitochondrial intermembrane space localization	Respration
AN6297		Ortholog(s) have copper ion binding activity and role in aerobic respiration, cellular protein-containing complex assembly	Respration
				Number of AtfA or AtfB dependent genes in the group:	0	0	0	0	1	1	7	0
				Number of genes in the group:	26	26	26	26	26	26	26	26
				Number of AtfA or AtfB depenent genes:	329	96	240	9	1496	439	1143	155
				Totel number of genes:	10775	10775	10775	10775	10775	10775	10775	10775
				p-value (Fisher's exact test):	1	1	1	1	0.9796	0.6613	0.016	1
